# Supplementary material for: Phosphoproteomic analysis of lettuce (Lactuca sativa L.) reveals starch and sucrose metabolism functions during bolting induced by high temperature
Source: PLoS One. 2020 Dec 29;15(12):e0244198. doi: 10.1371/journal.pone.0244198 (PMC7771692; doi:10.1371/journal.pone.0244198)
Supplement: S2 Table — (XLSX) [file pone.0244198.s002.xlsx]

## Sheet: H_vs_CK
Sequence	PSMs	Protein Group Accessions	Protein Name	Gene Name	Description	Modifications	Missed.Cleavages	phosphoRS Site Probabilities	phosphoRS Binomial Peptide Score	IonScore	Charge	Exp_Value	MH+ [Da]	ΔM [ppm]	H-1/REF	H-2/REF	H-3/REF	average H	CK-1/REF	CK-2/REF	CK-3/REF	average CK	H/CK	T-test P value
aLGsFRssGHV	9	XP_023729504.1	aquaporin PIP2-1-like [Lactuca sativa]		aquaporin PIP2-1-like [Lactuca sativa]	N-Term(iTRAQ8plex); S4(Phospho); S7(Phospho); S8(Phospho)	1	S(4): 100.0; S(7): 100.0; S(8): 100.0	281.329	29.95	2	0.0244296	1661.68	-1.4918	1.23118	1.25224	1.25857	1.24733	0.738694	0.728145	0.768619	0.745153	1.67392	4.35472e-06
icLEsAPssPEEGk	7	XP_023769400.1	putative ribosomal RNA-processing protein 12 [Lactuca sativa]		putative ribosomal RNA-processing protein 12 [Lactuca sativa]	N-Term(iTRAQ8plex); C2(Carbamidomethyl); S5(Phospho); S8(Phospho); S9(Phospho); K14(iTRAQ8plex)	0	S(5): 100.0; S(8): 100.0; S(9): 100.0	329.897	37.9	3	0.0103309	2352.01	-1.56841	1.15015	1.18231	1.15855	1.16367	0.83363	0.843643	0.848896	0.842056	1.38194	7.08538e-06
sGSGsssssEDDGEGGR	3	XP_023764813.1	dehydrin Rab18-like [Lactuca sativa]		dehydrin Rab18-like [Lactuca sativa]	N-Term(iTRAQ8plex); S1(Phospho); S5(Phospho); S6(Phospho); S7(Phospho); S8(Phospho); S9(Phospho)	0	S(1): 94.8; S(3): 5.2; S(5): 100.0; S(6): 100.0; S(7): 100.0; S(8): 100.0; S(9): 100.0	267.236	33.6	2	0.000501993	2341.59	-1.52214	1.55998	1.5532	1.68151	1.59823	0.380651	0.34549	0.394803	0.373648	4.27737	1.00845e-05
sLADAsVTDEPEVQSEEEk	18	XP_023747405.1	stress-related protein-like [Lactuca sativa]		stress-related protein-like [Lactuca sativa]	N-Term(Acetyl); S1(Phospho); S6(Phospho); K19(iTRAQ8plex)	0	S(1): 100.0; S(6): 100.0; T(8): 0.0; S(15): 0.0	346.361	75.31	2	2.00073e-06	2569.08	0.98634	1.21083	1.26015	1.25331	1.24143	0.770311	0.755846	0.740633	0.755597	1.64298	1.03542e-05
icLEsAPSsPEEGk	34	XP_023769400.1	putative ribosomal RNA-processing protein 12 [Lactuca sativa]		putative ribosomal RNA-processing protein 12 [Lactuca sativa]	N-Term(iTRAQ8plex); C2(Carbamidomethyl); S5(Phospho); S9(Phospho); K14(iTRAQ8plex)	0	S(5): 100.0; S(8): 0.0; S(9): 100.0	308.592	40.91	2	0.00792714	2272.04	-1.28547	1.12264	1.11597	1.11457	1.11773	0.895439	0.864918	0.887399	0.882585	1.26642	1.55926e-05
vIEEEsPRsPEAk	10	XP_023732707.1	SNF1-related protein kinase regulatory subunit gamma-1-like isoform X1 [Lactuca sativa]		SNF1-related protein kinase regulatory subunit gamma-1-like isoform X1 [Lactuca sativa]	N-Term(iTRAQ8plex); S6(Phospho); S9(Phospho); K13(iTRAQ8plex)	1	S(6): 100.0; S(9): 100.0	295.459	36.58	2	0.0301766	2239.08	-2.16359	1.295	1.27479	1.23535	1.26838	0.680767	0.679836	0.736504	0.699036	1.81447	2.43758e-05
qYsRsItPR	2	XP_023754846.1	serine/arginine-rich SC35-like splicing factor SCL30A [Lactuca sativa]		serine/arginine-rich SC35-like splicing factor SCL30A [Lactuca sativa]	N-Term(iTRAQ8plex); S3(Phospho); S5(Phospho); T7(Phospho)	1	Y(2): 50.6; S(3): 98.8; S(5): 50.6; T(7): 100.0	191.043	21.88	2	0.247454	1651.69	-1.20822	1.26287	1.33268	1.34486	1.31347	0.659235	0.708682	0.640237	0.669385	1.9622	3.91432e-05
rDDsVsP	5	XP_023754846.1	serine/arginine-rich SC35-like splicing factor SCL30A [Lactuca sativa]		serine/arginine-rich SC35-like splicing factor SCL30A [Lactuca sativa]	N-Term(iTRAQ8plex); S4(Phospho); S6(Phospho)	1	S(4): 100.0; S(6): 100.0	188.741	26.89	2	0.00941365	1239.49	-1.37228	1.43177	1.39059	1.43458	1.41898	0.661449	0.522441	0.582145	0.588678	2.41045	4.12276e-05
asPPPPsPk	11	XP_023760581.1	formin-like protein 16 [Lactuca sativa]		formin-like protein 16 [Lactuca sativa]	N-Term(iTRAQ8plex); S2(Phospho); S7(Phospho); K9(iTRAQ8plex)	0	S(2): 100.0; S(7): 100.0	331.943	39.92	3	0.00856126	1645.82	-2.05314	1.13507	1.18772	1.14717	1.15665	0.843456	0.824777	0.844193	0.837475	1.38112	4.89722e-05
sDSFDLsD	4	XP_023751041.1	TOM1-like protein 5 [Lactuca sativa]		TOM1-like protein 5 [Lactuca sativa]	N-Term(iTRAQ8plex); S7(Phospho)	0	S(1): 0.0; S(3): 0.0; S(7): 100.0	137.38	35.2	2	0.00255186	1269.52	-1.14898	1.18343	1.22729	1.17839	1.19637	0.789961	0.786725	0.83856	0.805082	1.48603	6.82202e-05
dSsPPVsPSR	5	XP_023737060.1	pollen-specific leucine-rich repeat extensin-like protein 1 isoform X1 [Lactuca sativa]		pollen-specific leucine-rich repeat extensin-like protein 1 isoform X1 [Lactuca sativa]	N-Term(iTRAQ8plex); S3(Phospho); S7(Phospho)	0	S(2): 2.8; S(3): 97.2; S(7): 50.0; S(9): 50.0	191.204	18.5	2	0.305814	1492.64	-1.26949	1.31398	1.21016	1.24592	1.25668	0.757136	0.752993	0.747246	0.752458	1.67011	7.92542e-05
aLGsFRsTTNN	10	XP_023757784.1	probable aquaporin PIP2-5 [Lactuca sativa]		probable aquaporin PIP2-5 [Lactuca sativa]	N-Term(iTRAQ8plex); S4(Phospho); S7(Phospho)	1	S(4): 100.0; S(7): 97.5; T(8): 2.4; T(9): 0.1	246.119	17.83	2	0.574385	1631.71	-0.697119	1.15236	1.16343	1.15683	1.15754	0.867547	0.840011	0.799905	0.835821	1.38491	8.56376e-05
iQsmAIYQDLNR	3	XP_023754054.1	cytosolic sulfotransferase 12-like [Lactuca sativa]		cytosolic sulfotransferase 12-like [Lactuca sativa]	N-Term(iTRAQ8plex); S3(Phospho); M4(Oxidation)	0	S(3): 100.0; Y(7): 0.0	104.76	16.01	2	2.0901	1851.9	-0.150529	1.18336	1.16214	1.16778	1.17109	0.833937	0.898299	0.86126	0.864498	1.35465	9.95193e-05
tPIASVFGNDsDEE	2	XP_023741001.1	G patch domain-containing protein 8 isoform X2 [Lactuca sativa]		G patch domain-containing protein 8 isoform X2 [Lactuca sativa]	N-Term(iTRAQ8plex); S11(Phospho)	0	T(1): 0.0; S(5): 0.0; S(11): 100.0	180.375	26.47	2	0.109781	1864.81	-0.640089	1.18347	1.12332	1.14496	1.15058	0.859773	0.829711	0.856261	0.848582	1.35589	0.000111827
ySGSsIDsSDGGk	5	XP_023759265.1	CLIP-associated protein-like [Lactuca sativa]		CLIP-associated protein-like [Lactuca sativa]	N-Term(iTRAQ8plex); S5(Phospho); S8(Phospho); K13(iTRAQ8plex)	0	Y(1): 0.0; S(2): 0.0; S(4): 2.9; S(5): 97.0; S(8): 97.1; S(9): 3.0	128.49	9.35	2	6.17891	2027.88	-1.3429	1.13672	1.09662	1.14729	1.12688	0.86774	0.869303	0.88829	0.875111	1.28769	0.000115204
nsGsDNESVk	1	XP_023735487.1	receptor protein kinase TMK1 [Lactuca sativa]		receptor protein kinase TMK1 [Lactuca sativa]	N-Term(iTRAQ8plex); S2(Phospho); S4(Phospho); K10(iTRAQ8plex)	0	S(2): 100.0; S(4): 100.0; S(8): 0.0	158.749	7.68	2	9.9294	1804.8	2.06883	1.34511	1.33914	1.22405	1.30277	0.6631	0.696779	0.714292	0.69139	1.88427	0.000131535
skPSsPSGEPPQTR	4	XP_023737060.1	pollen-specific leucine-rich repeat extensin-like protein 1 isoform X1 [Lactuca sativa]		pollen-specific leucine-rich repeat extensin-like protein 1 isoform X1 [Lactuca sativa]	N-Term(iTRAQ8plex); S1(Phospho); K2(iTRAQ8plex); S5(Phospho)	0	S(1): 100.0; S(4): 3.1; S(5): 96.8; S(7): 0.1; T(13): 0.0	196.425	14.32	3	4.192	2223.06	-1.252	1.19736	1.27921	1.21552	1.23069	0.778525	0.713818	0.777895	0.756746	1.6263	0.000133536
nsSTIFDLEDLLR	4	XP_023772279.1	probable inactive receptor kinase At1g48480 [Lactuca sativa]		probable inactive receptor kinase At1g48480 [Lactuca sativa]	N-Term(iTRAQ8plex); S2(Phospho)	0	S(2): 100.0; S(3): 0.0; T(4): 0.0	308.635	31.71	2	0.0698474	1906.94	-2.14579	1.17037	1.18009	1.12149	1.15732	0.816298	0.838748	0.860881	0.838643	1.37999	0.000137694
aISQPTsPVHVQPPPsPPLsPSR	20	XP_023737060.1	pollen-specific leucine-rich repeat extensin-like protein 1 isoform X1 [Lactuca sativa]		pollen-specific leucine-rich repeat extensin-like protein 1 isoform X1 [Lactuca sativa]	N-Term(iTRAQ8plex); S7(Phospho); S16(Phospho); S20(Phospho)	0	S(3): 0.2; T(6): 4.0; S(7): 95.9; S(16): 99.8; S(20): 96.0; S(22): 4.1	355.951	31.82	3	0.122587	2920.37	-0.766508	1.09415	1.09682	1.13462	1.10853	0.91959	0.894846	0.898827	0.904421	1.22568	0.000175734
mEsPGPETVVAk	2	XP_023746666.1	diacylglycerol kinase 4-like [Lactuca sativa]		diacylglycerol kinase 4-like [Lactuca sativa]	N-Term(Acetyl); M1(Oxidation); S3(Phospho); K12(iTRAQ8plex)	0	S(3): 100.0; T(8): 0.0	143.907	36.38	2	0.0148558	1686.8	-0.17441	1.13168	1.12055	1.12202	1.12475	0.903036	0.882319	0.837413	0.874256	1.28652	0.000219471
sNTAsPMWER	2	XP_023747760.1	RPM1-interacting protein 4-like [Lactuca sativa]		RPM1-interacting protein 4-like [Lactuca sativa]	N-Term(iTRAQ8plex); S1(Phospho); S5(Phospho)	0	S(1): 100.0; T(3): 50.0; S(5): 50.0	226.412	30.53	2	0.0205789	1642.66	-1.39688	1.14289	1.14386	1.17963	1.15546	0.872121	0.865397	0.806111	0.847877	1.36277	0.00022098
sADsDsDVDGIEIAk	61	XP_023770207.1	uncharacterized protein LOC111918812 [Lactuca sativa]		uncharacterized protein LOC111918812 [Lactuca sativa]	N-Term(iTRAQ8plex); S4(Phospho); S6(Phospho); K15(iTRAQ8plex)	0	S(1): 0.0; S(4): 100.0; S(6): 100.0	510.78	85.25	2	2.92866e-07	2290.03	-0.850082	1.16823	1.10808	1.13518	1.13717	0.863311	0.822951	0.87171	0.852658	1.33367	0.000245487
mDsDEDNVEQGSTELk	7	XP_023766767.1	uncharacterized protein LOC111915335 [Lactuca sativa]		uncharacterized protein LOC111915335 [Lactuca sativa]	N-Term(Acetyl); M1(Oxidation); S3(Phospho); K16(iTRAQ8plex)	0	S(3): 100.0; S(12): 0.0; T(13): 0.0	276.556	74.07	2	1.78047e-06	2238.93	0.315889	1.27838	1.17928	1.21506	1.22424	0.778131	0.757437	0.82608	0.787216	1.55515	0.000247263
tLDQEIQGDSGsEANVETFLEDAk	19	XP_023743611.1	uncharacterized protein LOC111891786 [Lactuca sativa]		uncharacterized protein LOC111891786 [Lactuca sativa]	N-Term(iTRAQ8plex); S12(Phospho); K24(iTRAQ8plex)	0	T(1): 0.0; S(10): 50.0; S(12): 50.0; T(18): 0.0	225.952	68.23	3	3.48053e-05	3284.58	4.31577	1.14043	1.13687	1.09201	1.1231	0.875877	0.902556	0.860994	0.879809	1.27653	0.000250099
sELTRDEssLAR	11	XP_023750278.1	probable serine/threonine-protein kinase PBL16 [Lactuca sativa]		probable serine/threonine-protein kinase PBL16 [Lactuca sativa]	N-Term(iTRAQ8plex); S8(Phospho); S9(Phospho)	1	S(1): 0.0; T(4): 0.0; S(8): 100.0; S(9): 100.0	277.65	31.65	2	0.0408295	1827.82	-0.613008	1.14978	1.12549	1.18493	1.1534	0.822514	0.870392	0.801829	0.831578	1.387	0.000269518
aMGSMEsDsE	3	XP_023752169.1	uncharacterized protein LOC111900509 [Lactuca sativa]		uncharacterized protein LOC111900509 [Lactuca sativa]	N-Term(iTRAQ8plex); S7(Phospho); S9(Phospho)	0	S(4): 0.0; S(7): 100.0; S(9): 100.0	175.067	41.32	2	0.000324678	1507.5	0.172835	1.12843	1.16152	1.12914	1.1397	0.907586	0.841183	0.878242	0.87567	1.30151	0.000281074
mVIEEEsPRsPEAk	3	XP_023732707.1	SNF1-related protein kinase regulatory subunit gamma-1-like isoform X1 [Lactuca sativa]		SNF1-related protein kinase regulatory subunit gamma-1-like isoform X1 [Lactuca sativa]	N-Term(iTRAQ8plex); S7(Phospho); S10(Phospho); K14(iTRAQ8plex)	1	S(7): 100.0; S(10): 100.0	202.05	9.03	3	17.91	2370.12	-3.17119	1.20882	1.3001	1.17179	1.2269	0.760825	0.779187	0.737634	0.759215	1.61601	0.000305312
eYSVIEtsEEEEEDEEk	8	XP_023734131.1	uncharacterized protein LOC111881993 [Lactuca sativa]		uncharacterized protein LOC111881993 [Lactuca sativa]	N-Term(iTRAQ8plex); T7(Phospho); S8(Phospho); K17(iTRAQ8plex)	0	Y(2): 0.0; S(3): 0.0; T(7): 100.0; S(8): 100.0	268.462	70.75	3	7.06772e-06	2842.19	0.16181	1.10459	1.14841	1.09477	1.11592	0.872539	0.849079	0.894444	0.87202	1.2797	0.000317423
sPFGFDDsVPGsPAsR	1	XP_023754119.1	epidermal growth factor receptor substrate 15-like 1 [Lactuca sativa]		epidermal growth factor receptor substrate 15-like 1 [Lactuca sativa]	N-Term(iTRAQ8plex); S8(Phospho); S12(Phospho); S15(Phospho)	0	S(1): 0.0; S(8): 100.0; S(12): 100.0; S(15): 100.0	275.466	20.48	2	0.235033	2166.84	-3.51115	1.15636	1.16867	1.15321	1.15941	0.895874	0.82805	0.805221	0.843048	1.37526	0.000331949
sVssDAPstVMADR	2	XP_023747433.1	probable alpha,alpha-trehalose-phosphate synthase [UDP-forming] 7 [Lactuca sativa]		probable alpha,alpha-trehalose-phosphate synthase [UDP-forming] 7 [Lactuca sativa]	N-Term(iTRAQ8plex); S3(Phospho); S4(Phospho); S8(Phospho); T9(Phospho)	0	S(1): 0.0; S(3): 100.0; S(4): 100.0; S(8): 100.0; T(9): 100.0	151.582	15.18	2	0.241194	2046.72	-3.40687	1.17746	1.13013	1.12669	1.14476	0.866982	0.810586	0.873959	0.850509	1.34597	0.000342262
eIsRTsIGNEEDFISSNk	6	XP_023767109.1	uncharacterized protein LOC111915708 [Lactuca sativa]		uncharacterized protein LOC111915708 [Lactuca sativa]	N-Term(iTRAQ8plex); S3(Phospho); S6(Phospho); K18(iTRAQ8plex)	1	S(3): 97.6; T(5): 51.2; S(6): 51.2; S(15): 0.0; S(16): 0.0	149.982	11.78	3	10.8953	2794.31	-2.18185	1.24952	1.22619	1.13474	1.20349	0.731024	0.734426	0.799723	0.755057	1.5939	0.000418023
sLADASVTDEPEVQSEEEk	15	XP_023747405.1	stress-related protein-like [Lactuca sativa]		stress-related protein-like [Lactuca sativa]	N-Term(Acetyl); S1(Phospho); K19(iTRAQ8plex)	0	S(1): 100.0; S(6): 0.0; T(8): 0.0; S(15): 0.0	340.493	83.04	2	5.17697e-07	2489.11	0.144279	1.16802	1.11112	1.14321	1.14078	0.856403	0.876195	0.802753	0.845117	1.34985	0.000420309
aIsQPTsPVHVQPPPsPPLsPSR	35	XP_023737060.1	pollen-specific leucine-rich repeat extensin-like protein 1 isoform X1 [Lactuca sativa]		pollen-specific leucine-rich repeat extensin-like protein 1 isoform X1 [Lactuca sativa]	N-Term(iTRAQ8plex); S3(Phospho); S7(Phospho); S16(Phospho); S20(Phospho)	0	S(3): 66.7; T(6): 66.7; S(7): 66.7; S(16): 100.0; S(20): 99.8; S(22): 0.2	353.185	26.61	3	0.330029	3000.34	0.975587	1.07482	1.10258	1.10307	1.09349	0.899227	0.938419	0.89145	0.909699	1.20204	0.000441889
tLSDTPPAsPAGstPPVsPFAGSEAFR	6	XP_023751833.1	dormancy-associated protein homolog 3-like isoform X1 [Lactuca sativa]		dormancy-associated protein homolog 3-like isoform X1 [Lactuca sativa]	N-Term(iTRAQ8plex); S9(Phospho); S13(Phospho); T14(Phospho); S18(Phospho)	0	T(1): 0.6; S(3): 94.3; T(5): 99.7; S(9): 5.4; S(13): 0.3; T(14): 99.7; S(18): 100.0; S(23): 0.0	267.996	48.41	3	0.00131377	3268.35	-1.8053	1.14559	1.23997	1.17928	1.18828	0.863863	0.856689	0.803686	0.841413	1.41224	0.000491454
asRsPPPYR	1	XP_023739154.1	serine/arginine-rich splicing factor RSZ22-like [Lactuca sativa]		serine/arginine-rich splicing factor RSZ22-like [Lactuca sativa]	N-Term(iTRAQ8plex); S2(Phospho); S4(Phospho)	1	S(2): 100.0; S(4): 50.0; Y(8): 50.0	159.543	8.5	2	5.84084	1494.68	-1.27828	1.11475	1.17483	1.14645	1.14534	0.845813	0.899709	0.82592	0.857147	1.33623	0.000506304
aIIAEGDcGsPR	2	XP_023764884.1	glucose-6-phosphate isomerase 1, chloroplastic [Lactuca sativa]		glucose-6-phosphate isomerase 1, chloroplastic [Lactuca sativa]	N-Term(iTRAQ8plex); C8(Carbamidomethyl); S10(Phospho)	0	S(10): 100.0	174.873	22.06	2	0.339776	1629.76	-2.36147	1.14401	1.12403	1.14154	1.13652	0.818461	0.908137	0.863112	0.863237	1.31658	0.00050912
nLsTPPPLVR	1	XP_023761140.1	villin-4-like [Lactuca sativa]		villin-4-like [Lactuca sativa]	N-Term(iTRAQ8plex); S3(Phospho)	0	S(3): 100.0; T(4): 0.0	193.471	18.11	2	1.56148	1477.8	-2.56692	1.11916	1.18267	1.14506	1.14896	0.808671	0.861867	0.884563	0.8517	1.34902	0.000516129
vGsEANWATWG	5	XP_023767549.1	stem-specific protein TSJT1-like [Lactuca sativa]		stem-specific protein TSJT1-like [Lactuca sativa]	N-Term(iTRAQ8plex); S3(Phospho)	0	S(3): 100.0; T(9): 0.0	245.066	45.09	2	0.00129162	1561.7	-1.16613	1.09105	1.06592	1.11821	1.09173	0.874962	0.90961	0.912698	0.89909	1.21426	0.00057132
dYEEVGAEsGDGDEDEGEY	8	XP_023764450.1	tubulin alpha-4 chain-like [Lactuca sativa]		tubulin alpha-4 chain-like [Lactuca sativa]	N-Term(iTRAQ8plex); S9(Phospho)	0	Y(2): 0.0; S(9): 99.9; Y(19): 0.1	164.116	59.71	2	2.00448e-05	2448.91	2.03531	1.20277	1.1547	1.11957	1.15901	0.839579	0.896866	0.840681	0.859042	1.34919	0.00061069
asPEkPPPAIIVQPAsPR	11	PLY98846.1	hypothetical protein LSAT_7X20241 [Lactuca sativa]		hypothetical protein LSAT_7X20241 [Lactuca sativa]	N-Term(Acetyl); S2(Phospho); K5(iTRAQ8plex); S16(Phospho)	0	S(2): 100.0; S(16): 100.0	464.763	44.14	3	0.00580338	2361.19	-0.570127	1.15665	1.09098	1.17282	1.14015	0.877774	0.870538	0.824858	0.857723	1.32928	0.000710515
wGVVEDSDsQRNsPANTSSR	4	XP_023768597.1	serine/threonine-protein kinase PBL27-like [Lactuca sativa]		serine/threonine-protein kinase PBL27-like [Lactuca sativa]	N-Term(iTRAQ8plex); S9(Phospho); S13(Phospho)	1	S(7): 0.0; S(9): 100.0; S(13): 100.0; T(17): 0.0; S(18): 0.0; S(19): 0.0	219.333	13.02	3	4.01602	2656.13	-0.995915	1.08542	1.11436	1.12638	1.10872	0.843216	0.920362	0.862081	0.87522	1.26679	0.000877281
lNMGGGGDFDEDEDDsDtEDEIEMk	2	XP_023770812.1	uncharacterized protein OsI_027940-like [Lactuca sativa]		uncharacterized protein OsI_027940-like [Lactuca sativa]	N-Term(iTRAQ8plex); S16(Phospho); T18(Phospho); K25(iTRAQ8plex)	0	S(16): 100.0; T(18): 100.0	128.128	32.47	3	0.038391	3531.38	-0.149327	1.3811	1.23741	1.27229	1.29693	0.600517	0.703228	0.780793	0.694846	1.8665	0.000888842
aGSSTTFLsPPsSPR	8	XP_023728903.1	probable serine incorporator [Lactuca sativa]		probable serine incorporator [Lactuca sativa]	N-Term(iTRAQ8plex); S9(Phospho); S12(Phospho)	0	S(3): 0.0; S(4): 0.0; T(5): 0.0; T(6): 0.0; S(9): 100.0; S(12): 2.3; S(13): 97.7	302.135	26.92	2	0.145822	1955.88	1.24836	1.14214	1.10451	1.20286	1.14984	0.880675	0.839086	0.81356	0.84444	1.36165	0.00091851
gLENLDVAYsPGGRsGFDtPAsSTR	4	XP_023768204.1	probable alkaline/neutral invertase D [Lactuca sativa]		probable alkaline/neutral invertase D [Lactuca sativa]	N-Term(iTRAQ8plex); S10(Phospho); S15(Phospho); T19(Phospho); S22(Phospho)	1	Y(9): 92.2; S(10): 7.8; S(15): 99.9; T(19): 100.0; S(22): 91.6; S(23): 7.7; T(24): 0.7	177.959	29.42	3	0.0828587	3178.28	-1.63342	1.17176	1.17165	1.07763	1.14035	0.831367	0.869455	0.849621	0.850147	1.34135	0.00094749
sLADAsVtDEPEVQSEEEk	12	XP_023747405.1	stress-related protein-like [Lactuca sativa]		stress-related protein-like [Lactuca sativa]	N-Term(Acetyl); S1(Phospho); S6(Phospho); T8(Phospho); K19(iTRAQ8plex)	0	S(1): 100.0; S(6): 100.0; T(8): 100.0; S(15): 0.0	299.292	66.09	2	1.13792e-05	2649.05	2.8835	1.1026	1.07521	1.1349	1.10423	0.900529	0.919572	0.860189	0.89343	1.23595	0.00101483
gSFDDVssDEDGGNR	1	XP_023753370.1	protein phosphatase inhibitor 2-like isoform X2 [Lactuca sativa]		protein phosphatase inhibitor 2-like isoform X2 [Lactuca sativa]	N-Term(iTRAQ8plex); S7(Phospho); S8(Phospho)	0	S(2): 0.0; S(7): 100.0; S(8): 100.0	186.006	25.81	2	0.0505162	2020.74	-2.7417	1.13239	1.23427	1.20668	1.19111	0.821187	0.862554	0.749265	0.811002	1.46869	0.00107206
iQsMAIYQDLNR	11	XP_023754054.1	cytosolic sulfotransferase 12-like [Lactuca sativa]		cytosolic sulfotransferase 12-like [Lactuca sativa]	N-Term(iTRAQ8plex); S3(Phospho)	0	S(3): 100.0; Y(7): 0.0	296.356	40.86	2	0.00859318	1835.9	-2.58915	1.18074	1.2126	1.23401	1.20912	0.791201	0.812978	0.924709	0.842963	1.43436	0.00115467
sStPTYsPPk	5	XP_023764710.1	uncharacterized protein LOC111913223 [Lactuca sativa]		uncharacterized protein LOC111913223 [Lactuca sativa]	N-Term(iTRAQ8plex); T3(Phospho); S7(Phospho); K10(iTRAQ8plex)	0	S(1): 1.0; S(2): 49.5; T(3): 49.5; T(5): 0.0; Y(6): 0.0; S(7): 100.0	207.225	21.55	3	0.521032	1832.87	-1.61887	1.13169	1.19979	1.11949	1.15032	0.876675	0.797955	0.876788	0.850473	1.35257	0.00116491
tVLPESGGNTTEssPEVR	11	XP_023736968.1	protein WEAK CHLOROPLAST MOVEMENT UNDER BLUE LIGHT 1-like [Lactuca sativa]		protein WEAK CHLOROPLAST MOVEMENT UNDER BLUE LIGHT 1-like [Lactuca sativa]	N-Term(iTRAQ8plex); S13(Phospho); S14(Phospho)	0	T(1): 0.0; S(6): 0.0; T(10): 33.6; T(11): 33.6; S(13): 34.3; S(14): 98.5	268.517	44.9	2	0.0028816	2324.03	-1.17831	1.08742	1.17986	1.0909	1.11939	0.84969	0.881382	0.838473	0.856515	1.30692	0.00132455
asPPPPPPPPsPk	47	XP_023764710.1	uncharacterized protein LOC111913223 [Lactuca sativa]		uncharacterized protein LOC111913223 [Lactuca sativa]	N-Term(iTRAQ8plex); S2(Phospho); S11(Phospho); K13(iTRAQ8plex)	0	S(2): 100.0; S(11): 100.0	532.298	60.79	2	0.000106628	2034.03	-1.39465	1.11763	1.11859	1.07085	1.10236	0.90132	0.872756	0.939055	0.904377	1.21891	0.00134205
mDsDEDNVEQGSTELk	10	XP_023766767.1	uncharacterized protein LOC111915335 [Lactuca sativa]		uncharacterized protein LOC111915335 [Lactuca sativa]	N-Term(Acetyl); S3(Phospho); K16(iTRAQ8plex)	0	S(3): 100.0; S(12): 0.0; T(13): 0.0	284.682	54.67	2	0.000179638	2222.93	-0.871077	1.09452	1.0785	1.13432	1.10245	0.917242	0.923454	0.863259	0.901318	1.22315	0.00135854
sVSsDAPsTVMADR	3	XP_023747433.1	probable alpha,alpha-trehalose-phosphate synthase [UDP-forming] 7 [Lactuca sativa]		probable alpha,alpha-trehalose-phosphate synthase [UDP-forming] 7 [Lactuca sativa]	N-Term(iTRAQ8plex); S1(Phospho); S4(Phospho); S8(Phospho)	0	S(1): 96.2; S(3): 7.6; S(4): 96.2; S(8): 96.0; T(9): 4.0	179.588	19.82	2	0.182927	1966.75	-2.23059	1.209	1.21197	1.12271	1.18122	0.868458	0.825259	0.745531	0.813083	1.45277	0.00136627
vVTQHENDDDGsssD	6	XP_023745387.1	phosducin-like protein 3 [Lactuca sativa]		phosducin-like protein 3 [Lactuca sativa]	N-Term(iTRAQ8plex); S12(Phospho); S13(Phospho); S14(Phospho)	0	T(3): 0.0; S(12): 100.0; S(13): 100.0; S(14): 100.0	402.103	70.36	2	9.6187e-07	2148.73	-0.312603	1.20027	1.09963	1.11657	1.13882	0.886207	0.829964	0.82394	0.846703	1.34501	0.00137638
amAADASVFTFGDDDEDYEsD	5	XP_023754731.1	phosphatidylinositol 3,4,5-trisphosphate 3-phosphatase and protein-tyrosine-phosphatase PTEN2A [Lactuca sativa]		phosphatidylinositol 3,4,5-trisphosphate 3-phosphatase and protein-tyrosine-phosphatase PTEN2A [Lactuca sativa]	N-Term(iTRAQ8plex); M2(Oxidation); S20(Phospho)	0	S(7): 0.0; T(10): 0.0; Y(18): 0.0; S(20): 100.0	180.772	43.7	2	0.0018023	2671.03	1.51752	1.12953	1.09849	1.057	1.09501	0.892115	0.868544	0.922911	0.894523	1.22412	0.00157876
eTELTIsEstsEGLENDAR	1	XP_023758019.1	uncharacterized protein LOC111906495 isoform X5 [Lactuca sativa]		uncharacterized protein LOC111906495 isoform X5 [Lactuca sativa]	N-Term(iTRAQ8plex); S7(Phospho); S9(Phospho); T10(Phospho); S11(Phospho)	0	T(2): 0.6; T(5): 20.2; S(7): 90.3; S(9): 90.3; T(10): 98.7; S(11): 99.8	73.0709	11.41	3	2.31286	2705.02	-0.504254	1.13257	1.10851	1.09362	1.11157	0.94303	0.883021	0.850633	0.892228	1.24583	0.00171376
dLSTDQQsEDDDsPLtPGR	4	XP_023734110.1	uncharacterized protein LOC111881964 [Lactuca sativa]		uncharacterized protein LOC111881964 [Lactuca sativa]	N-Term(iTRAQ8plex); S8(Phospho); S13(Phospho); T16(Phospho)	0	S(3): 0.0; T(4): 0.0; S(8): 100.0; S(13): 100.0; T(16): 100.0	281.956	84.58	3	1.31672e-07	2620.01	0.234631	1.15666	1.19963	1.07963	1.14531	0.877108	0.888339	0.839142	0.868196	1.31918	0.00190333
vYFDsDGDDDDVAR	2	XP_023729610.1	DEAD-box ATP-dependent RNA helicase 32 [Lactuca sativa]		DEAD-box ATP-dependent RNA helicase 32 [Lactuca sativa]	N-Term(iTRAQ8plex); S5(Phospho)	0	Y(2): 2.7; S(5): 97.3	108.031	11.57	2	2.64021	1972.81	-2.0943	1.14783	1.10375	1.06847	1.10668	0.853235	0.886631	0.924253	0.88804	1.24621	0.00207631
vNsEYsMsPQR	3	XP_023739479.1	serine/arginine-rich splicing factor RS2Z32-like isoform X5 [Lactuca sativa]		serine/arginine-rich splicing factor RS2Z32-like isoform X5 [Lactuca sativa]	N-Term(iTRAQ8plex); S3(Phospho); S6(Phospho); S8(Phospho)	0	S(3): 100.0; Y(5): 0.1; S(6): 100.0; S(8): 100.0	249.84	28.11	2	0.0219426	1841.69	0.265052	1.31958	1.12458	1.20597	1.21671	0.752121	0.821353	0.71856	0.764011	1.59253	0.00212507
tLSDtPPAsPAGstPPVsPFAGSEAFR	2	XP_023751833.1	dormancy-associated protein homolog 3-like isoform X1 [Lactuca sativa]		dormancy-associated protein homolog 3-like isoform X1 [Lactuca sativa]	N-Term(iTRAQ8plex); T5(Phospho); S9(Phospho); S13(Phospho); T14(Phospho); S18(Phospho)	0	T(1): 0.8; S(3): 93.6; T(5): 99.6; S(9): 6.0; S(13): 100.0; T(14): 100.0; S(18): 100.0; S(23): 0.0	327.127	78.28	3	9.85175e-07	3348.33	0.819585	1.15959	1.0638	1.17792	1.13377	0.836084	0.890435	0.858222	0.86158	1.31592	0.00216201
nVSsVcsIPEMDDFDLTk	17	XP_023768204.1	probable alkaline/neutral invertase D [Lactuca sativa]		probable alkaline/neutral invertase D [Lactuca sativa]	N-Term(iTRAQ8plex); S4(Phospho); C6(Carbamidomethyl); S7(Phospho); K18(iTRAQ8plex)	0	S(3): 2.9; S(4): 97.1; S(7): 100.0; T(17): 0.0	246.985	42.3	3	0.0082232	2825.26	-1.73617	1.12806	1.11364	1.09587	1.11253	0.920661	0.809118	0.887055	0.872278	1.27543	0.00219267
eGsEEGsSPR	2	XP_023733552.1;PLY88894.1	vesicle-associated protein 1-1-like [Lactuca sativa]		vesicle-associated protein 1-1-like [Lactuca sativa]	N-Term(iTRAQ8plex); S3(Phospho); S7(Phospho)	0	S(3): 99.9; S(7): 96.4; S(8): 3.8	126.067	22.33	2	0.0654965	1498.58	-0.568612	1.11268	1.22638	1.20264	1.18057	0.863409	0.740583	0.856027	0.820006	1.43971	0.00239326
iSNsAPVtPPLsSPTSk	2	XP_023765295.1	protein BRASSINAZOLE-RESISTANT 1 [Lactuca sativa]		protein BRASSINAZOLE-RESISTANT 1 [Lactuca sativa]	N-Term(iTRAQ8plex); S4(Phospho); T8(Phospho); S12(Phospho); K17(iTRAQ8plex)	0	S(2): 0.3; S(4): 99.7; T(8): 100.0; S(12): 2.4; S(13): 47.7; T(15): 47.7; S(16): 2.3	154.096	19.8	3	1.61153	2531.21	1.49435	1.11844	1.12188	1.06697	1.10243	0.908464	0.928612	0.843388	0.893488	1.23385	0.00260279
vNSEYsMsPQR	1	XP_023739479.1	serine/arginine-rich splicing factor RS2Z32-like isoform X5 [Lactuca sativa]		serine/arginine-rich splicing factor RS2Z32-like isoform X5 [Lactuca sativa]	N-Term(iTRAQ8plex); S6(Phospho); S8(Phospho)	0	S(3): 0.0; Y(5): 50.0; S(6): 50.0; S(8): 100.0	233.923	17.56	2	0.554226	1761.73	4.23933	1.2144	1.10946	1.11062	1.14482	0.846347	0.907651	0.818546	0.857515	1.33505	0.00275239
tLDQEIQGDsGsEANVETFLEDAk	6	XP_023743611.1	uncharacterized protein LOC111891786 [Lactuca sativa]		uncharacterized protein LOC111891786 [Lactuca sativa]	N-Term(iTRAQ8plex); S10(Phospho); S12(Phospho); K24(iTRAQ8plex)	0	T(1): 0.0; S(10): 100.0; S(12): 100.0; T(18): 0.0	180.15	54.68	3	0.000629585	3364.53	-0.836573	1.1189	1.16728	1.14178	1.14266	0.885114	0.724085	0.841268	0.816822	1.3989	0.00287435
aLGsFRsSGHV	9	XP_023729504.1	aquaporin PIP2-1-like [Lactuca sativa]		aquaporin PIP2-1-like [Lactuca sativa]	N-Term(iTRAQ8plex); S4(Phospho); S7(Phospho)	1	S(4): 100.0; S(7): 97.8; S(8): 2.2	252.271	20.91	2	0.369798	1581.71	-0.781292	1.07677	1.20392	1.19327	1.15799	0.868216	0.886149	0.803636	0.852667	1.35808	0.00308737
ySAsGATsPTk	1	PLY90378.1	hypothetical protein LSAT_7X111701 [Lactuca sativa]		hypothetical protein LSAT_7X111701 [Lactuca sativa]	N-Term(iTRAQ8plex); S4(Phospho); S8(Phospho); K11(iTRAQ8plex)	0	Y(1): 0.0; S(2): 0.1; S(4): 99.7; T(7): 0.3; S(8): 3.3; T(10): 96.5	95.9215	9.45	2	8.31395	1837.85	-3.26585	1.10621	1.14544	1.1085	1.12005	0.930165	0.813005	0.902838	0.882002	1.26989	0.00318725
lFLSIDsDsEEEG	6	XP_023733270.1	E3 SUMO-protein ligase SIZ1-like [Lactuca sativa]		E3 SUMO-protein ligase SIZ1-like [Lactuca sativa]	N-Term(iTRAQ8plex); S7(Phospho); S9(Phospho)	0	S(4): 2.8; S(7): 97.2; S(9): 100.0	183.914	80.24	2	3.07527e-07	1904.78	-0.357673	1.0811	1.08791	1.15056	1.10652	0.922765	0.837046	0.910779	0.890197	1.24301	0.00338675
lPESIDsDDsDIEGDVk	3	XP_023738882.1	RNA-binding protein 34 [Lactuca sativa]		RNA-binding protein 34 [Lactuca sativa]	N-Term(iTRAQ8plex); S7(Phospho); S10(Phospho); K17(iTRAQ8plex)	0	S(4): 0.0; S(7): 100.0; S(10): 100.0	188.602	24.33	2	0.40403	2602.17	0.632346	1.07477	1.16966	1.07849	1.10764	0.908639	0.908223	0.924293	0.913718	1.21223	0.00352284
sLADAsVTDEPEVQSEEEk	1	XP_023747405.1	stress-related protein-like [Lactuca sativa]		stress-related protein-like [Lactuca sativa]	N-Term(iTRAQ8plex); S1(Phospho); S6(Phospho); K19(iTRAQ8plex)	0	S(1): 100.0; S(6): 100.0; T(8): 0.0; S(15): 0.0	188.927	27.58	3	0.266762	2831.3	8.03604	1.20638	1.08642	1.19944	1.16408	0.872599	0.765375	0.877433	0.838469	1.38834	0.00365394
gAIMELsPFGk	3	XP_023764710.1;XP_023760581.1	uncharacterized protein LOC111913223 [Lactuca sativa]		uncharacterized protein LOC111913223 [Lactuca sativa]	N-Term(iTRAQ8plex); S7(Phospho); K11(iTRAQ8plex)	0	S(7): 100.0	101.278	17.87	3	2.03642	1837.97	-2.78017	1.12011	1.08969	1.05923	1.08967	0.877525	0.856652	0.947435	0.893871	1.21905	0.00386555
vATEFEYDGEGsPTAR	4	XP_023765836.1	uncharacterized protein LOC111914294 isoform X1 [Lactuca sativa]		uncharacterized protein LOC111914294 isoform X1 [Lactuca sativa]	N-Term(iTRAQ8plex); S12(Phospho)	0	T(3): 0.0; Y(7): 0.0; S(12): 98.0; T(14): 2.0	230.791	42.53	2	0.00440075	2112.94	-0.80106	1.12866	1.15662	1.11663	1.13397	0.915713	0.789288	0.923071	0.876024	1.29445	0.00458945
sDHEDHk	1	XP_023738480.1	reticulon-like protein B1 [Lactuca sativa]		reticulon-like protein B1 [Lactuca sativa]	N-Term(Acetyl); S1(Phospho); K7(iTRAQ8plex)	0	S(1): 100.0	186.431	17.03	2	0.359647	1293.54	-1.68927	1.11321	1.21883	1.09222	1.14142	0.80977	0.914812	0.851399	0.858661	1.3293	0.00470509
gGEGGssDEISR	2	PLY82444.1	hypothetical protein LSAT_2X109721 [Lactuca sativa]		hypothetical protein LSAT_2X109721 [Lactuca sativa]	N-Term(iTRAQ8plex); S6(Phospho); S7(Phospho)	0	S(6): 100.0; S(7): 100.0; S(11): 0.0	163.872	16.74	2	0.384483	1614.64	2.72548	1.11434	1.07072	1.1774	1.12082	0.942251	0.854349	0.852369	0.88299	1.26935	0.00516158
gNksGsDDEGAGVVk	2	XP_023730404.1	MAR-binding filament-like protein 1-1 isoform X2 [Lactuca sativa]		MAR-binding filament-like protein 1-1 isoform X2 [Lactuca sativa]	N-Term(iTRAQ8plex); K3(iTRAQ8plex); S4(Phospho); S6(Phospho); K15(iTRAQ8plex)	1	S(4): 100.0; S(6): 100.0	168.07	25.47	3	0.439877	2492.21	-3.26988	1.08974	1.11913	1.07625	1.09504	0.94011	0.842155	0.936696	0.90632	1.20823	0.00543582
sLADAsVtDEPEVQsEEEkLk	1	XP_023747405.1	stress-related protein-like [Lactuca sativa]		stress-related protein-like [Lactuca sativa]	N-Term(Acetyl); S1(Phospho); S6(Phospho); T8(Phospho); S15(Phospho); K19(iTRAQ8plex); K21(iTRAQ8plex)	1	S(1): 100.0; S(6): 100.0; T(8): 100.0; S(15): 100.0	199.941	41.1	3	0.0101999	3274.4	2.22847	1.23732	1.16771	1.0535	1.15284	0.841629	0.817945	0.876785	0.845453	1.36358	0.0054502
sLsPPDsPVR	1	XP_023755742.1	uncharacterized protein LOC111904192, partial [Lactuca sativa]		uncharacterized protein LOC111904192, partial [Lactuca sativa]	N-Term(iTRAQ8plex); S3(Phospho); S7(Phospho)	0	S(1): 0.0; S(3): 100.0; S(7): 100.0	182.432	8.31	2	5.89545	1518.69	-1.35314	1.14885	1.09886	1.05873	1.10215	0.846158	0.928341	0.923616	0.899372	1.22546	0.00554134
fRPsPPsPSPTVPILPR	11	XP_023743548.1	uncharacterized protein LOC111891708 [Lactuca sativa]		uncharacterized protein LOC111891708 [Lactuca sativa]	N-Term(iTRAQ8plex); S4(Phospho); S7(Phospho)	0	S(4): 100.0; S(7): 100.0; S(9): 0.0; T(11): 0.0	279.462	29.51	3	0.180845	2309.17	-0.661072	1.10293	1.17322	1.05522	1.11046	0.914944	0.881796	0.814451	0.870397	1.27581	0.00607074
qLsPVREGsEER	3	PLY62710.1	hypothetical protein LSAT_6X42581 [Lactuca sativa]		hypothetical protein LSAT_6X42581 [Lactuca sativa]	N-Term(iTRAQ8plex); S3(Phospho); S9(Phospho)	1	S(3): 100.0; S(9): 100.0	128.742	13.47	2	2.6582	1850.83	-0.604731	1.04945	1.14907	1.20881	1.13578	0.871001	0.86289	0.767935	0.833942	1.36194	0.00612762
sSATNPLIVFTFDELR	10	XP_023750278.1	probable serine/threonine-protein kinase PBL16 [Lactuca sativa]		probable serine/threonine-protein kinase PBL16 [Lactuca sativa]	N-Term(iTRAQ8plex); S1(Phospho)	0	S(1): 98.8; S(2): 1.2; T(4): 0.0; T(11): 0.0	363.368	77.13	2	2.89205e-06	2194.11	-1.78099	1.08898	1.1584	1.04409	1.09716	0.857909	0.884826	0.928629	0.890455	1.23213	0.00615368
iVEsPIsPSLEk	2	XP_023732346.1	phototropin-2 [Lactuca sativa]		phototropin-2 [Lactuca sativa]	N-Term(iTRAQ8plex); S4(Phospho); S7(Phospho); K12(iTRAQ8plex)	0	S(4): 100.0; S(7): 100.0; S(9): 0.0	214.933	31.35	3	0.0949008	2067.06	-2.0178	1.16454	1.03398	1.1949	1.13114	0.859726	0.892213	0.860915	0.870952	1.29874	0.00673252
aLGsFRsNATN	1	XP_023736370.1	aquaporin PIP2-7 [Lactuca sativa]		aquaporin PIP2-7 [Lactuca sativa]	N-Term(iTRAQ8plex); S4(Phospho); S7(Phospho)	1	S(4): 100.0; S(7): 100.0; T(10): 0.0	128.807	14.25	3	1.58228	1601.7	-1.36581	1.22722	1.24565	1.23163	1.23483	0.574376	0.868178	0.842869	0.761808	1.62093	0.0073675
sTsEIsEVEIGILPk	11	XP_023750735.1	protein NETWORKED 1D [Lactuca sativa]		protein NETWORKED 1D [Lactuca sativa]	N-Term(iTRAQ8plex); S3(Phospho); S6(Phospho); K15(iTRAQ8plex)	0	S(1): 1.1; T(2): 49.5; S(3): 49.5; S(6): 100.0	352.506	28.97	3	0.229382	2370.2	-0.774264	1.14723	1.10526	1.03484	1.09578	0.924812	0.87634	0.931962	0.911038	1.20278	0.00763745
aPEsEsESEYDFLR	2	XP_023764289.1	calmodulin-binding transcription activator 2-like isoform X2 [Lactuca sativa]		calmodulin-binding transcription activator 2-like isoform X2 [Lactuca sativa]	N-Term(iTRAQ8plex); S4(Phospho); S6(Phospho)	0	S(4): 100.0; S(6): 99.7; S(8): 0.2; Y(10): 0.2	118.968	18.12	2	0.595096	2122.86	1.43917	1.15054	1.06443	1.18558	1.13352	0.906467	0.791167	0.913165	0.870266	1.30249	0.00793242
nIDIDTIQQSYtV	2	XP_023731474.1	plasma membrane ATPase 3-like [Lactuca sativa]		plasma membrane ATPase 3-like [Lactuca sativa]	N-Term(iTRAQ8plex); T12(Phospho)	0	T(6): 0.0; S(10): 0.0; Y(11): 1.7; T(12): 98.3	203.462	77.85	2	1.66028e-06	1893.91	-0.848346	1.05271	1.08608	1.13881	1.09253	0.94412	0.854021	0.929564	0.909235	1.2016	0.008133
rDsGNsLQsSSDISDDEGLGk	7	XP_023772378.1	phototropin-1 isoform X2 [Lactuca sativa]		phototropin-1 isoform X2 [Lactuca sativa]	N-Term(iTRAQ8plex); S3(Phospho); S6(Phospho); S9(Phospho); K21(iTRAQ8plex)	1	S(3): 100.0; S(6): 100.0; S(9): 33.3; S(10): 33.3; S(11): 33.3; S(14): 0.0	303.589	31.42	3	0.0709209	3015.29	1.57277	1.10533	1.1455	1.05944	1.10342	0.969277	0.865632	0.888847	0.907919	1.21533	0.0081533
eTLVNPFVLGIEDEEDDEDMsIGDGVLEDPLEEk	2	XP_023743611.1	uncharacterized protein LOC111891786 [Lactuca sativa]		uncharacterized protein LOC111891786 [Lactuca sativa]	N-Term(iTRAQ8plex); S21(Phospho); K34(iTRAQ8plex)	0	T(2): 0.0; S(21): 100.0	95.7929	9.88	4	30.7223	4479.12	3.73012	1.13024	1.46029	1.28578	1.2921	0.722766	0.842909	0.827282	0.797652	1.61988	0.00850462
sVSFSPDR	1	XP_023761140.1	villin-4-like [Lactuca sativa]		villin-4-like [Lactuca sativa]	N-Term(iTRAQ8plex); S1(Phospho)	0	S(1): 100.0; S(3): 0.0; S(5): 0.0	150.425	20.49	2	0.280051	1278.6	-3.42386	1.21253	1.03088	1.13786	1.12709	0.864473	0.880118	0.88514	0.876577	1.28579	0.00917354
sVSsDAPsTVMADR	4	XP_023747433.1	probable alpha,alpha-trehalose-phosphate synthase [UDP-forming] 7 [Lactuca sativa]		probable alpha,alpha-trehalose-phosphate synthase [UDP-forming] 7 [Lactuca sativa]	N-Term(iTRAQ8plex); S4(Phospho); S8(Phospho)	0	S(1): 0.0; S(3): 0.1; S(4): 99.9; S(8): 96.8; T(9): 3.2	194.339	28.19	2	0.056586	1886.8	2.66844	1.10191	1.12078	1.23071	1.15113	0.92411	0.854739	0.742456	0.840435	1.36969	0.00947088
kDsPTASQLsDGEk	2	XP_023764710.1	uncharacterized protein LOC111913223 [Lactuca sativa]		uncharacterized protein LOC111913223 [Lactuca sativa]	N-Term(iTRAQ8plex); K1(iTRAQ8plex); S3(Phospho); S10(Phospho); K14(iTRAQ8plex)	1	S(3): 100.0; T(5): 49.4; S(7): 1.2; S(10): 49.4	192.868	22.59	4	1.02671	2535.25	-1.22352	1.12824	1.18601	1.02416	1.11281	0.872451	0.917892	0.861155	0.883833	1.25907	0.0104932
sPPAVDTGNAPLSISSPTtVAEsQR	1	XP_023744189.1	probable NAD(P)H dehydrogenase (quinone) FQR1-like 2 [Lactuca sativa]		probable NAD(P)H dehydrogenase (quinone) FQR1-like 2 [Lactuca sativa]	N-Term(iTRAQ8plex); T19(Phospho); S23(Phospho)	0	S(1): 0.0; T(7): 0.0; S(13): 0.0; S(15): 4.1; S(16): 95.9; T(18): 0.0; T(19): 0.0; S(23): 100.0	241.945	20.57	3	1.58956	2946.39	1.79434	1.11246	1.22222	1.08975	1.14148	0.826034	0.953746	0.799397	0.859726	1.32772	0.0109257
qAIRPsSSsPSR	2	XP_023745312.1	protein IQ-DOMAIN 14-like isoform X2 [Lactuca sativa]		protein IQ-DOMAIN 14-like isoform X2 [Lactuca sativa]	N-Term(iTRAQ8plex); S6(Phospho); S9(Phospho)	0	S(6): 96.3; S(7): 3.6; S(8): 3.7; S(9): 96.3; S(11): 0.1	118.08	19.85	2	0.696651	1736.8	-1.08243	1.2422	1.03539	1.13572	1.13777	0.901383	0.843614	0.852839	0.865945	1.31391	0.0120592
aEQTTVAAATDsPLk	1	XP_023765188.1	spermidine synthase 1-like [Lactuca sativa]		spermidine synthase 1-like [Lactuca sativa]	N-Term(Acetyl); S12(Phospho); K15(iTRAQ8plex)	0	T(4): 0.0; T(5): 0.0; T(10): 0.0; S(12): 100.0	253.648	72.44	2	5.67599e-06	1928.95	-0.155289	1.1705	1.06119	1.12644	1.11938	0.808513	0.876375	0.961847	0.882245	1.26878	0.0121892
mDssDDEGEEYLFk	5	XP_023748644.1	ras-related protein RABA5c-like [Lactuca sativa]		ras-related protein RABA5c-like [Lactuca sativa]	N-Term(Acetyl); M1(Oxidation); S3(Phospho); S4(Phospho); K14(iTRAQ8plex)	0	S(3): 100.0; S(4): 100.0; Y(11): 0.0	222.421	34.47	2	0.00641305	2186.81	0.282305	1.18546	1.0262	1.12286	1.11151	0.864583	0.831774	0.930747	0.875701	1.26928	0.0125452
aLPGPDVQVLASSAsDsEEDDtDEDTTk	1	XP_023748785.1	inner membrane protein PPF-1, chloroplastic [Lactuca sativa]		inner membrane protein PPF-1, chloroplastic [Lactuca sativa]	N-Term(iTRAQ8plex); S15(Phospho); S17(Phospho); T22(Phospho); K28(iTRAQ8plex)	0	S(12): 29.0; S(13): 29.0; S(15): 79.0; S(17): 79.0; T(22): 79.0; T(26): 3.3; T(27): 1.7	79.3844	15.77	3	3.53442	3740.56	-6.18342	1.02603	1.20216	1.27769	1.16862	0.847576	0.7856	0.870933	0.834703	1.40005	0.0132807
gAAsssGsDDE	1	XP_023769455.1	dnaJ protein ERDJ2A [Lactuca sativa]		dnaJ protein ERDJ2A [Lactuca sativa]	N-Term(iTRAQ8plex); S4(Phospho); S5(Phospho); S6(Phospho); S8(Phospho)	0	S(4): 100.0; S(5): 100.0; S(6): 100.0; S(8): 100.0	165.523	26.82	2	0.00207477	1606.43	-1.88717	1.1461	1.03864	1.10084	1.09519	0.969888	0.856808	0.902007	0.909567	1.20408	0.0148581
sADsDSDVDGIEIAk	2	XP_023770207.1	uncharacterized protein LOC111918812 [Lactuca sativa]		uncharacterized protein LOC111918812 [Lactuca sativa]	N-Term(iTRAQ8plex); S4(Phospho); K15(iTRAQ8plex)	0	S(1): 1.7; S(4): 49.2; S(6): 49.2	91.1071	8.79	3	16.7606	2210.06	-3.11376	1.1112	1.11605	1.09742	1.10822	0.992551	0.813737	0.879848	0.895379	1.23771	0.0154197
sNDDsDsE	3	XP_023742468.1	thioredoxin domain-containing protein 9 homolog [Lactuca sativa]		thioredoxin domain-containing protein 9 homolog [Lactuca sativa]	N-Term(iTRAQ8plex); S5(Phospho); S7(Phospho)	0	S(1): 0.0; S(5): 100.0; S(7): 100.0	178.752	38	2	0.000348677	1332.42	-1.06242	1.07555	1.11579	1.15123	1.11419	0.980347	0.947335	0.839435	0.922372	1.20796	0.0159984
sDYEDSkDESLIEk	12	XP_023752736.1	reticulon-like protein B1 [Lactuca sativa]		reticulon-like protein B1 [Lactuca sativa]	N-Term(Acetyl); S1(Phospho); K7(iTRAQ8plex); K14(iTRAQ8plex)	1	S(1): 100.0; Y(3): 0.0; S(6): 0.0; S(10): 0.0	363.341	33.88	2	0.0611435	2388.13	0.222089	1.12388	1.1209	1.07763	1.10747	0.901972	0.792269	0.97328	0.889174	1.24551	0.016277
sESDITSLAPSsPsRSPk	8	XP_023738860.1	uncharacterized protein LOC111886839 [Lactuca sativa]		uncharacterized protein LOC111886839 [Lactuca sativa]	N-Term(iTRAQ8plex); S12(Phospho); S14(Phospho); K18(iTRAQ8plex)	1	S(1): 0.0; S(3): 0.0; T(6): 0.0; S(7): 0.0; S(11): 2.7; S(12): 97.3; S(14): 0.1; S(16): 99.9	306.866	18.27	3	2.47755	2614.26	-1.12872	1.13081	1.09807	1.08555	1.10481	0.924153	0.821246	0.985431	0.910277	1.21371	0.0174086
yPDDkDGEIAVGsPLR	3	PLY98846.1	hypothetical protein LSAT_7X20241 [Lactuca sativa]		hypothetical protein LSAT_7X20241 [Lactuca sativa]	N-Term(iTRAQ8plex); K5(iTRAQ8plex); S13(Phospho)	1	Y(1): 0.0; S(13): 100.0	257.315	12.62	3	9.47979	2420.23	-1.32608	1.03851	1.11902	1.16466	1.1074	0.860918	0.823822	0.972108	0.885616	1.25042	0.018543
tSNADTDmDsDssDsDEDEIENEGPk	1	XP_023746526.1	glutamate-rich WD repeat-containing protein 1-like [Lactuca sativa]		glutamate-rich WD repeat-containing protein 1-like [Lactuca sativa]	N-Term(iTRAQ8plex); M8(Oxidation); S10(Phospho); S12(Phospho); S13(Phospho); S15(Phospho); K26(iTRAQ8plex)	0	T(1): 0.0; S(2): 0.0; T(6): 6.8; S(10): 94.3; S(12): 99.6; S(13): 99.6; S(15): 99.6	105.132	20.85	3	0.239684	3747.33	2.22666	1.10495	1.05158	1.21439	1.12364	0.922618	0.935256	0.795453	0.884442	1.27045	0.0217268
iPSTsIDstASSTTR	1	PLY89708.1	hypothetical protein LSAT_7X29400 [Lactuca sativa]		hypothetical protein LSAT_7X29400 [Lactuca sativa]	N-Term(iTRAQ8plex); S5(Phospho); S8(Phospho); T9(Phospho)	0	S(3): 48.8; T(4): 48.8; S(5): 2.5; S(8): 97.4; T(9): 48.9; S(11): 48.6; S(12): 2.5; T(13): 2.5; T(14): 0.1	125.991	11.06	2	3.44317	2067.86	-0.465411	1.01063	1.11278	1.21039	1.11127	0.896378	0.861916	0.923577	0.893957	1.24309	0.022763
tLSDtPPAsPAGsTTPEADQR	1	XP_023746802.1	dormancy-associated protein homolog 3-like isoform X6 [Lactuca sativa]		dormancy-associated protein homolog 3-like isoform X6 [Lactuca sativa]	N-Term(iTRAQ8plex); T5(Phospho); S9(Phospho); S13(Phospho)	0	T(1): 0.1; S(3): 7.6; T(5): 92.4; S(9): 98.9; S(13): 4.6; T(14): 48.2; T(15): 48.2	106.86	5.76	3	19.7635	2643.11	6.50802	1.15947	1.24249	1.01153	1.13783	0.783425	0.903973	0.889689	0.859029	1.32455	0.0228221
mDsPGPEk	3	PLY75416.1	hypothetical protein LSAT_7X51280 [Lactuca sativa]		hypothetical protein LSAT_7X51280 [Lactuca sativa]	N-Term(Acetyl); M1(Oxidation); S3(Phospho); K8(iTRAQ8plex)	0	S(3): 100.0	165.224	25.59	2	0.057144	1302.56	-2.58003	1.17976	1.01735	1.13624	1.11111	0.945752	0.933742	0.82934	0.902944	1.23055	0.0269779
sLSQssDsDDHHIHQNNAk	1	XP_023762763.1	reticulon-like protein B9 [Lactuca sativa]		reticulon-like protein B9 [Lactuca sativa]	N-Term(Acetyl); S1(Phospho); S5(Phospho); S6(Phospho); S8(Phospho); K19(iTRAQ8plex)	0	S(1): 99.0; S(3): 1.2; S(5): 99.9; S(6): 100.0; S(8): 100.0	110.71	18.57	3	0.300925	2786.02	0.563634	1.1023	1.05074	1.20294	1.11866	0.891928	0.975285	0.80042	0.889211	1.25804	0.0272112
mSEEVQDGEDDVTsSQNASsEDIk	10	XP_023735176.1	titin isoform X2 [Lactuca sativa]		titin isoform X2 [Lactuca sativa]	N-Term(iTRAQ8plex); S14(Phospho); S20(Phospho); K24(iTRAQ8plex)	0	S(2): 0.0; T(13): 33.4; S(14): 33.4; S(15): 33.4; S(19): 49.9; S(20): 49.9	103.384	10.35	3	11.4214	3368.44	5.58773	0.995865	1.21537	1.15681	1.12268	0.885752	0.926617	0.831429	0.881266	1.27394	0.0274878
aLPGPDVQVLASsAsDSEEDDTDEDTTk	2	XP_023748785.1	inner membrane protein PPF-1, chloroplastic [Lactuca sativa]		inner membrane protein PPF-1, chloroplastic [Lactuca sativa]	N-Term(iTRAQ8plex); S13(Phospho); S15(Phospho); K28(iTRAQ8plex)	0	S(12): 5.4; S(13): 51.1; S(15): 94.4; S(17): 48.8; T(22): 0.3; T(26): 0.0; T(27): 0.0	180.761	34.13	3	0.071729	3660.6	-4.57832	1.07315	1.12673	1.32737	1.17575	0.875229	0.693136	0.916626	0.828331	1.41942	0.0283341
sVPYPTPPLQPPsPNNNPNPNHGAR	2	XP_023740111.1	enhancer of mRNA-decapping protein 4-like [Lactuca sativa]		enhancer of mRNA-decapping protein 4-like [Lactuca sativa]	N-Term(iTRAQ8plex); S13(Phospho)	0	S(1): 0.0; Y(4): 0.0; T(6): 0.0; S(13): 100.0	149.442	8.61	3	28.7837	3046.48	-2.52518	1.13847	1.14791	0.986822	1.09107	0.921273	0.932869	0.862739	0.905627	1.20476	0.0304833
aAAsPSGPTGASSFDNTTAsPLPYANsPR	1	XP_023762006.1	mediator of RNA polymerase II transcription subunit 8 isoform X2 [Lactuca sativa]		mediator of RNA polymerase II transcription subunit 8 isoform X2 [Lactuca sativa]	N-Term(iTRAQ8plex); S4(Phospho); S20(Phospho); S27(Phospho)	0	S(4): 91.1; S(6): 8.8; T(9): 0.6; S(12): 0.5; S(13): 0.5; T(17): 4.5; T(18): 47.0; S(20): 47.0; Y(24): 0.0; S(27): 100.0	144.375	9.98	3	12.196	3336.41	-2.39772	1.28792	1.11261	1.1457	1.18208	0.722063	1.01403	0.724781	0.82029	1.44105	0.0309254
eSIMAsLcPQDEksDSDPDSNYLEk	3	XP_023745115.1	AP3-complex subunit beta-A [Lactuca sativa]		AP3-complex subunit beta-A [Lactuca sativa]	N-Term(iTRAQ8plex); S6(Phospho); C8(Carbamidomethyl); K13(iTRAQ8plex); S14(Phospho); K25(iTRAQ8plex)	1	S(2): 0.0; S(6): 97.4; S(14): 48.8; S(16): 48.8; S(20): 2.5; Y(22): 2.5	158.565	18.56	4	3.14227	3930.76	-6.83864	1.09471	1.23101	1.04724	1.12432	0.972609	0.865776	0.794051	0.877478	1.28131	0.0310077
qGVGssDDDEFDDDER	1	XP_023729905.1	meiosis regulator and mRNA stability factor 1-like [Lactuca sativa]		meiosis regulator and mRNA stability factor 1-like [Lactuca sativa]	N-Term(iTRAQ8plex); S5(Phospho); S6(Phospho)	0	S(5): 100.0; S(6): 100.0	68.33	7.05	2	2.3176	2249.8	-1.99924	1.20147	1.05396	1.06114	1.10552	0.831019	0.979669	0.88085	0.897179	1.23222	0.0326041
mDssSPSPISLPDQkPk	6	XP_023749938.1	patellin-6 [Lactuca sativa]		patellin-6 [Lactuca sativa]	N-Term(Acetyl); S3(Phospho); S4(Phospho); K15(iTRAQ8plex); K17(iTRAQ8plex)	0	S(3): 99.6; S(4): 93.9; S(5): 6.1; S(7): 0.4; S(10): 0.0	119.449	9.66	3	17.8761	2624.26	0.738227	1.04589	1.22105	1.10259	1.12318	0.874971	0.984444	0.781294	0.880236	1.27599	0.0359325
lyEcLPSSLRPSSGsPDSSGk	1	PLY89461.1	hypothetical protein LSAT_8X21741 [Lactuca sativa]		hypothetical protein LSAT_8X21741 [Lactuca sativa]	N-Term(iTRAQ8plex); Y2(Phospho); C4(Carbamidomethyl); S15(Phospho); K21(iTRAQ8plex)	0	Y(2): 93.8; S(7): 0.4; S(8): 0.4; S(12): 5.8; S(13): 5.8; S(15): 93.2; S(18): 0.4; S(19): 0.4	98.3058	1.96	3	127.232	2992.4	1.53824	1.06033	1.0301	1.26665	1.11902	0.919507	0.838716	0.90738	0.888534	1.2594	0.0424993
eYsVIEtsEEEEEDEEk	1	XP_023734131.1	uncharacterized protein LOC111881993 [Lactuca sativa]		uncharacterized protein LOC111881993 [Lactuca sativa]	N-Term(iTRAQ8plex); S3(Phospho); T7(Phospho); S8(Phospho); K17(iTRAQ8plex)	0	Y(2): 3.2; S(3): 96.8; T(7): 100.0; S(8): 100.0	196.744	31.17	3	0.0431185	2922.17	2.42639	1.02677	1.08749	1.23773	1.11733	0.803775	0.974736	0.888231	0.888914	1.25696	0.0458101
nsPPsPPNPINPVSHPPsPLALPsPQLkPEYEQk	5	XP_023764710.1	uncharacterized protein LOC111913223 [Lactuca sativa]		uncharacterized protein LOC111913223 [Lactuca sativa]	N-Term(iTRAQ8plex); S2(Phospho); S5(Phospho); S18(Phospho); S24(Phospho); K28(iTRAQ8plex); K34(iTRAQ8plex)	0	S(2): 100.0; S(5): 100.0; S(14): 0.0; S(18): 100.0; S(24): 100.0; Y(31): 0.0	220.193	5.45	5	94.8676	4886.38	0.29539	1.0913	1.23529	0.997919	1.10817	0.851994	0.823397	0.959555	0.878315	1.2617	0.0461922
sAsPPPISsPk	3	XP_023728434.1	uncharacterized protein At2g33490-like [Lactuca sativa]		uncharacterized protein At2g33490-like [Lactuca sativa]	N-Term(iTRAQ8plex); S3(Phospho); S9(Phospho); K11(iTRAQ8plex)	0	S(1): 0.0; S(3): 100.0; S(8): 2.0; S(9): 98.0	240.606	24.59	3	0.3809	1835.91	-1.15498	1.1873	1.09485	0.988865	1.09034	0.852116	0.9122	0.957298	0.907205	1.20187	0.0477826
sLDNsFsIk	1	XP_023759641.1	calcium-dependent protein kinase 1-like [Lactuca sativa]		calcium-dependent protein kinase 1-like [Lactuca sativa]	N-Term(iTRAQ8plex); S5(Phospho); S7(Phospho); K9(iTRAQ8plex)	0	S(1): 0.0; S(5): 100.0; S(7): 100.0	135.456	19.01	2	1.07453	1778.85	-3.03803	0.670556	0.693968	0.633683	0.666069	1.39421	1.35421	1.30378	1.35073	0.493117	2.65135e-05
eGDHHDGGsssSsDsD	12	XP_023768019.1	protein SRC1 [Lactuca sativa]		protein SRC1 [Lactuca sativa]	N-Term(iTRAQ8plex); S9(Phospho); S10(Phospho); S11(Phospho); S13(Phospho); S15(Phospho)	0	S(9): 100.0; S(10): 97.8; S(11): 68.1; S(12): 68.1; S(13): 68.1; S(15): 97.8	195.477	52.87	2	5.15193e-06	2279.58	-1.94044	0.804183	0.830931	0.823351	0.819489	1.25688	1.20005	1.20886	1.22193	0.670651	3.16946e-05
nLSSFsSLSsPR	8	XP_023752830.1	uncharacterized protein LOC111901180 [Lactuca sativa]		uncharacterized protein LOC111901180 [Lactuca sativa]	N-Term(iTRAQ8plex); S6(Phospho); S10(Phospho)	0	S(3): 2.8; S(4): 97.2; S(6): 0.1; S(7): 0.0; S(9): 2.8; S(10): 97.2	173.881	39.5	2	0.00620476	1745.78	-2.02985	0.709772	0.642708	0.655342	0.669274	1.3876	1.28944	1.32773	1.33493	0.501356	4.60683e-05
qGsVTAHMMDPMVTLFGsVHEk	3	XP_023748498.1	monosaccharide-sensing protein 2-like [Lactuca sativa]		monosaccharide-sensing protein 2-like [Lactuca sativa]	N-Term(iTRAQ8plex); S3(Phospho); S18(Phospho); K22(iTRAQ8plex)	0	S(3): 0.0; T(5): 0.0; T(14): 100.0; S(18): 100.0	112.476	17.05	3	4.4705	3170.52	13.5408	0.653104	0.683705	0.585305	0.640705	1.42707	1.33667	1.3576	1.37378	0.466381	5.16156e-05
tAALQPsRsPsPsPR	20	XP_023740171.1	serine/arginine-rich splicing factor RS2Z33-like isoform X2 [Lactuca sativa]		serine/arginine-rich splicing factor RS2Z33-like isoform X2 [Lactuca sativa]	N-Term(iTRAQ8plex); S7(Phospho); S9(Phospho); S11(Phospho); S13(Phospho)	1	T(1): 0.0; S(7): 100.0; S(9): 100.0; S(11): 100.0; S(13): 100.0	334.046	23.34	2	0.186769	2175.89	-1.10201	0.833984	0.804416	0.844318	0.827573	1.19749	1.14137	1.18421	1.17436	0.704702	7.48264e-05
lIRPPGsSDsLVLGEGDSk	17	XP_023762151.1	protein NUCLEAR FUSION DEFECTIVE 4-like [Lactuca sativa]		protein NUCLEAR FUSION DEFECTIVE 4-like [Lactuca sativa]	N-Term(iTRAQ8plex); S7(Phospho); S10(Phospho); K19(iTRAQ8plex)	0	S(7): 97.8; S(8): 2.3; S(10): 99.9; S(18): 0.0	236.754	16.81	3	4.0387	2695.36	0.957836	0.820462	0.844164	0.769355	0.811327	1.17229	1.20067	1.17773	1.18356	0.685495	9.63824e-05
tAALQPsRsPSPsPR	9	XP_023740171.1	serine/arginine-rich splicing factor RS2Z33-like isoform X2 [Lactuca sativa]		serine/arginine-rich splicing factor RS2Z33-like isoform X2 [Lactuca sativa]	N-Term(iTRAQ8plex); S7(Phospho); S9(Phospho); S13(Phospho)	1	T(1): 0.0; S(7): 100.0; S(9): 100.0; S(11): 99.9; S(13): 0.2	168.826	18.32	2	1.0689	2095.93	0.730367	0.886129	0.891919	0.898543	0.892197	1.12647	1.08473	1.08415	1.09845	0.812232	0.000140401
aIEsFRssTHV	3	XP_023729503.1	aquaporin PIP2-1-like [Lactuca sativa]		aquaporin PIP2-1-like [Lactuca sativa]	N-Term(iTRAQ8plex); S4(Phospho); S7(Phospho); S8(Phospho)	1	S(4): 100.0; S(7): 100.0; S(8): 100.0; T(9): 0.0	234.76	20.48	2	0.291889	1777.73	0.0606781	0.840695	0.78109	0.845847	0.822544	1.20979	1.24089	1.17849	1.20972	0.679945	0.000147722
wMsVsSPETVESR	3	XP_023744529.1	protein IQ-DOMAIN 32 [Lactuca sativa]		protein IQ-DOMAIN 32 [Lactuca sativa]	N-Term(iTRAQ8plex); S3(Phospho); S5(Phospho)	0	S(3): 100.0; S(5): 49.4; S(6): 49.4; T(9): 1.3; S(12): 0.0	189.918	27.3	2	0.0684317	1958.82	-4.66015	0.854097	0.846908	0.778901	0.826635	1.16956	1.17476	1.19844	1.18092	0.699993	0.00015688
dMIQPASHGsILsVR	32	XP_023762187.1	monosaccharide-sensing protein 2-like [Lactuca sativa]		monosaccharide-sensing protein 2-like [Lactuca sativa]	N-Term(iTRAQ8plex); S10(Phospho); S13(Phospho)	0	S(7): 0.0; S(10): 100.0; S(13): 100.0	322.382	42.27	3	0.00567726	2074.97	-1.05819	0.8641	0.830404	0.834791	0.843098	1.1926	1.12121	1.15569	1.1565	0.72901	0.000172851
gGsFLAGNLsFSR	8	PLY91820.1;PLY84008.1	hypothetical protein LSAT_0X840 [Lactuca sativa]		hypothetical protein LSAT_0X840 [Lactuca sativa]	N-Term(iTRAQ8plex); S3(Phospho); S10(Phospho)	0	S(3): 100.0; S(10): 97.8; S(12): 2.2	246.777	36.74	2	0.0117251	1776.8	-1.56635	0.880616	0.87069	0.871822	0.874376	1.13909	1.07847	1.11393	1.1105	0.787372	0.000189109
gsHIsLAGADMPADGESFQAAALVSQPALYSk	5	XP_023740321.1	monosaccharide-sensing protein 2-like [Lactuca sativa]		monosaccharide-sensing protein 2-like [Lactuca sativa]	N-Term(iTRAQ8plex); S2(Phospho); S5(Phospho); K32(iTRAQ8plex)	0	S(2): 100.0; S(5): 100.0; S(17): 0.0; S(25): 0.0; Y(30): 0.0; S(31): 0.0	239.596	43.62	3	0.0129441	3957.91	3.62919	0.80685	0.870367	0.819014	0.832077	1.17952	1.12785	1.15479	1.15405	0.721004	0.0001944
dMIQPAsHGsILsVR	15	XP_023762187.1	monosaccharide-sensing protein 2-like [Lactuca sativa]		monosaccharide-sensing protein 2-like [Lactuca sativa]	N-Term(iTRAQ8plex); S7(Phospho); S10(Phospho); S13(Phospho)	0	S(7): 100.0; S(10): 100.0; S(13): 100.0	382.315	39.32	2	0.00747895	2154.94	-0.230023	0.7386	0.726908	0.815779	0.760429	1.33007	1.32889	1.2273	1.29542	0.587014	0.000262961
lQsFsSFREPMEAPNk	7	XP_023759795.1	BEACH domain-containing protein C2-like [Lactuca sativa]		BEACH domain-containing protein C2-like [Lactuca sativa]	N-Term(iTRAQ8plex); S3(Phospho); S5(Phospho); K16(iTRAQ8plex)	1	S(3): 98.6; S(5): 50.7; S(6): 50.7	214.782	16.5	3	3.56069	2636.24	-0.859869	0.878618	0.878327	0.824414	0.860453	1.10404	1.12014	1.14529	1.12316	0.766101	0.00026472
kAEssDESDsDDssDEEDAk	1	XP_023736442.1	nucleolin 1-like isoform X3 [Lactuca sativa]		nucleolin 1-like isoform X3 [Lactuca sativa]	K1(iTRAQ8plex); N-Term(iTRAQ8plex); S4(Phospho); S5(Phospho); S10(Phospho); S13(Phospho); S14(Phospho); K20(iTRAQ8plex)	1	S(4): 99.9; S(5): 99.3; S(8): 8.6; S(10): 92.3; S(13): 99.9; S(14): 99.9	109.443	11.99	3	1.5083	3458.25	-2.02209	0.735649	0.641386	0.772866	0.716634	1.3417	1.32339	1.24196	1.30235	0.550262	0.000296809
nDDDDEtsEsDsPSDSLR	5	XP_023730080.1	probable sucrose-phosphate synthase 1 [Lactuca sativa]		probable sucrose-phosphate synthase 1 [Lactuca sativa]	N-Term(iTRAQ8plex); T7(Phospho); S8(Phospho); S10(Phospho); S12(Phospho)	0	T(7): 100.0; S(8): 100.0; S(10): 100.0; S(12): 100.0; S(14): 0.0; S(16): 0.0	286.052	55.83	2	1.43669e-05	2607.83	2.0124	0.727774	0.834335	0.737886	0.766665	1.21933	1.25392	1.17075	1.21467	0.631174	0.000423703
tIQFVDWcPtGFk	13	XP_023758361.1;XP_023757910.1;XP_023755786.1;XP_023764450.1	tubulin alpha chain-like [Lactuca sativa]		tubulin alpha chain-like [Lactuca sativa]	N-Term(iTRAQ8plex); C8(Carbamidomethyl); T10(Phospho); K13(iTRAQ8plex)	0	T(1): 0.0; T(10): 100.0	313.186	39.95	3	0.0157452	2287.14	-1.88381	0.840807	0.808409	0.761498	0.803571	1.1741	1.17745	1.26427	1.20527	0.666713	0.000427293
aFGSSMsLPssAAR	4	XP_023768981.1	uncharacterized protein LOC111917536 [Lactuca sativa]		uncharacterized protein LOC111917536 [Lactuca sativa]	N-Term(iTRAQ8plex); S7(Phospho); S10(Phospho); S11(Phospho)	0	S(4): 49.0; S(5): 49.0; S(7): 2.0; S(10): 100.0; S(11): 100.0	184.682	21.86	2	0.146616	1912.76	-3.40532	0.87553	0.846595	0.917566	0.879897	1.1135	1.11668	1.15511	1.12843	0.779754	0.00053706
nAkPFVEWLQsAESEsE	3	XP_023753986.1	eukaryotic translation initiation factor 5-like [Lactuca sativa]		eukaryotic translation initiation factor 5-like [Lactuca sativa]	N-Term(iTRAQ8plex); K3(iTRAQ8plex); S11(Phospho); S16(Phospho)	0	S(11): 51.4; S(14): 51.4; S(16): 97.2	139.475	19.89	3	1.45745	2719.25	-1.12057	0.938657	0.867014	0.893097	0.89959	1.10979	1.1039	1.1164	1.11003	0.810419	0.000582922
tSAENDFMtEyVVTR	15	XP_023748812.1	mitogen-activated protein kinase 3-like [Lactuca sativa]		mitogen-activated protein kinase 3-like [Lactuca sativa]	N-Term(iTRAQ8plex); T9(Phospho); Y11(Phospho)	0	T(1): 0.0; S(2): 0.0; T(9): 100.0; Y(11): 100.0; T(14): 0.0	417.715	61.27	2	3.88527e-05	2226.93	-0.409826	0.899555	0.897416	0.947767	0.914913	1.11443	1.10258	1.08213	1.09971	0.831958	0.000619802
eGDHHDGGsssssDsD	10	XP_023768019.1	protein SRC1 [Lactuca sativa]		protein SRC1 [Lactuca sativa]	N-Term(iTRAQ8plex); S9(Phospho); S10(Phospho); S11(Phospho); S12(Phospho); S13(Phospho); S15(Phospho)	0	S(9): 100.0; S(10): 100.0; S(11): 100.0; S(12): 100.0; S(13): 100.0; S(15): 100.0	258.724	33.92	2	0.00192617	2359.55	-0.332134	0.787015	0.776296	0.829377	0.797563	1.30266	1.16936	1.19757	1.2232	0.652032	0.000621029
aEEAQYssGADYATTk	1	XP_023757573.1	far upstream element-binding protein 2 [Lactuca sativa]		far upstream element-binding protein 2 [Lactuca sativa]	N-Term(Acetyl); S7(Phospho); S8(Phospho); K16(iTRAQ8plex)	0	Y(6): 0.3; S(7): 99.9; S(8): 99.9; Y(12): 0.0; T(14): 0.0; T(15): 0.0	139.984	43.79	2	0.0016379	2197.89	0.375503	0.835296	0.828988	0.710668	0.791651	1.21554	1.18989	1.24856	1.21799	0.649962	0.000631876
dmIQPAsHGsILsVR	3	XP_023762187.1	monosaccharide-sensing protein 2-like [Lactuca sativa]		monosaccharide-sensing protein 2-like [Lactuca sativa]	N-Term(iTRAQ8plex); M2(Oxidation); S7(Phospho); S10(Phospho); S13(Phospho)	0	S(7): 100.0; S(10): 100.0; S(13): 100.0	197.873	22.77	2	0.326579	2170.93	0.764476	0.866848	0.854506	0.870418	0.863924	1.16995	1.16365	1.08194	1.13851	0.758819	0.000671539
lSPsPPMsPVR	3	XP_023769868.1	beta-amylase 1, chloroplastic [Lactuca sativa]		beta-amylase 1, chloroplastic [Lactuca sativa]	N-Term(iTRAQ8plex); S4(Phospho); S8(Phospho)	0	S(2): 0.0; S(4): 100.0; S(8): 100.0	221.355	31.08	2	0.0407461	1631.76	-0.907285	0.909326	0.867889	0.83954	0.872252	1.19144	1.1174	1.15101	1.15328	0.75632	0.000675661
yLsPPYLsPVWSGk	8	PLY63977.1	hypothetical protein LSAT_4X182821 [Lactuca sativa]		hypothetical protein LSAT_4X182821 [Lactuca sativa]	N-Term(iTRAQ8plex); S3(Phospho); S8(Phospho); K14(iTRAQ8plex)	0	Y(1): 0.0; S(3): 100.0; Y(6): 0.0; S(8): 100.0; S(12): 0.0	310.848	33.82	3	0.0716003	2362.16	-4.18104	0.855369	0.870759	0.785178	0.837102	1.20165	1.1218	1.17637	1.16661	0.717553	0.000736536
qGAEMDRLsPsPPMsPVR	3	XP_023769868.1	beta-amylase 1, chloroplastic [Lactuca sativa]		beta-amylase 1, chloroplastic [Lactuca sativa]	N-Term(iTRAQ8plex); S9(Phospho); S11(Phospho); S15(Phospho)	1	S(9): 100.0; S(11): 100.0; S(15): 100.0	233.915	21.05	3	0.487239	2499.05	0.430682	0.833412	0.781387	0.804034	0.806277	1.11311	1.20443	1.24361	1.18705	0.679227	0.000782967
gsLIsVAGGDMAADAGDVFQAAALVSQPALYSk	12	XP_023762187.1	monosaccharide-sensing protein 2-like [Lactuca sativa]		monosaccharide-sensing protein 2-like [Lactuca sativa]	N-Term(iTRAQ8plex); S2(Phospho); S5(Phospho); K33(iTRAQ8plex)	0	S(2): 100.0; S(5): 100.0; S(26): 0.0; Y(31): 0.0; S(32): 0.0	450.498	43.75	3	0.0119783	3948.94	1.2731	0.860794	0.826707	0.805942	0.831148	1.23864	1.11954	1.16267	1.17362	0.708192	0.000866106
sRsPMEGDDGVPVEENGHsRsPsPAPR	1	XP_023740171.1	serine/arginine-rich splicing factor RS2Z33-like isoform X2 [Lactuca sativa]		serine/arginine-rich splicing factor RS2Z33-like isoform X2 [Lactuca sativa]	N-Term(iTRAQ8plex); S1(Phospho); S3(Phospho); S19(Phospho); S21(Phospho); S23(Phospho)	2	S(1): 100.0; S(3): 100.0; S(19): 100.0; S(21): 100.0; S(23): 100.0	215.564	10.15	3	4.12504	3551.34	-1.28551	0.837206	0.907567	0.801116	0.84863	1.16063	1.13203	1.18753	1.16006	0.731537	0.000893585
dGGDDsGsDVGGGNNDsDDNLHsPLIsR	3	XP_023762187.1	monosaccharide-sensing protein 2-like [Lactuca sativa]		monosaccharide-sensing protein 2-like [Lactuca sativa]	N-Term(iTRAQ8plex); S6(Phospho); S8(Phospho); S17(Phospho); S23(Phospho); S27(Phospho)	0	S(6): 100.0; S(8): 100.0; S(17): 100.0; S(23): 100.0; S(27): 100.0	501.78	52.11	3	0.000112577	3476.19	-0.532792	0.890521	0.80135	0.786318	0.826063	1.19415	1.23282	1.14135	1.18944	0.694499	0.000977894
hEDWDEEsVGRDGGDDsGsDVGGGNNDsDDNLHsPLIsR	1	XP_023762187.1	monosaccharide-sensing protein 2-like [Lactuca sativa]		monosaccharide-sensing protein 2-like [Lactuca sativa]	N-Term(iTRAQ8plex); S8(Phospho); S17(Phospho); S19(Phospho); S28(Phospho); S34(Phospho); S38(Phospho)	1	S(8): 100.0; S(17): 100.0; S(19): 100.0; S(28): 100.0; S(34): 100.0; S(38): 100.0	240.151	19.82	4	0.901605	4895.71	0.64888	0.790231	0.858698	0.744983	0.797971	1.20319	1.28539	1.15339	1.21399	0.657311	0.00120502
qGDDSGsDsDEPQEYYTGGEk	9	PLY85691.1	hypothetical protein LSAT_7X92681 [Lactuca sativa]		hypothetical protein LSAT_7X92681 [Lactuca sativa]	N-Term(iTRAQ8plex); S7(Phospho); S9(Phospho); K21(iTRAQ8plex)	0	S(5): 66.7; S(7): 66.7; S(9): 66.7; Y(15): 0.0; Y(16): 0.0; T(17): 0.0	108.065	15.54	3	1.85983	3032.22	0.395123	0.898444	0.86795	0.918969	0.895121	1.07101	1.14547	1.11123	1.10924	0.806968	0.00120796
hEDWDEEsVGRDGGDDsGsDVGGGNNDsDDNLHsPLISR	5	XP_023762187.1	monosaccharide-sensing protein 2-like [Lactuca sativa]		monosaccharide-sensing protein 2-like [Lactuca sativa]	N-Term(iTRAQ8plex); S8(Phospho); S17(Phospho); S19(Phospho); S28(Phospho); S34(Phospho)	1	S(8): 100.0; S(17): 100.0; S(19): 100.0; S(28): 100.0; S(34): 99.9; S(38): 0.1	257.655	23.46	4	0.28965	4815.74	1.17127	0.766961	0.69276	0.714916	0.724879	1.16126	1.29258	1.38115	1.27833	0.56705	0.00120923
tTDPATVTADNssDDGASVTDTQR	11	XP_023767875.1	protein MODIFIER OF SNC1 11 [Lactuca sativa]		protein MODIFIER OF SNC1 11 [Lactuca sativa]	N-Term(iTRAQ8plex); S12(Phospho); S13(Phospho)	0	T(1): 0.0; T(2): 0.0; T(6): 0.0; T(8): 0.0; S(12): 100.0; S(13): 100.0; S(18): 0.0; T(20): 0.0; T(22): 0.0	385.392	91.37	3	6.28428e-08	2889.2	0.336549	0.946677	0.891695	0.903556	0.913976	1.10248	1.17645	1.10371	1.12755	0.810588	0.00196043
aDsDNsEDQNSR	3	XP_023736800.1	WPP domain-interacting protein 2-like [Lactuca sativa]		WPP domain-interacting protein 2-like [Lactuca sativa]	N-Term(iTRAQ8plex); S3(Phospho); S6(Phospho)	0	S(3): 100.0; S(6): 100.0; S(11): 0.0	200.004	20.36	2	0.0966472	1801.66	0.228436	0.86874	0.825154	0.910835	0.868243	1.17288	1.14118	1.08051	1.13152	0.767323	0.0019974
kAEssDEsDsDDssDEEDAk	4	XP_023736442.1	nucleolin 1-like isoform X3 [Lactuca sativa]		nucleolin 1-like isoform X3 [Lactuca sativa]	K1(iTRAQ8plex); N-Term(iTRAQ8plex); S4(Phospho); S5(Phospho); S8(Phospho); S10(Phospho); S13(Phospho); S14(Phospho); K20(iTRAQ8plex)	1	S(4): 100.0; S(5): 100.0; S(8): 100.0; S(10): 100.0; S(13): 100.0; S(14): 100.0	163.105	35.62	3	0.00453731	3538.22	0.0528152	0.822199	0.753234	0.743205	0.772879	1.21358	1.11551	1.31037	1.21316	0.637082	0.00201343
lAsIDAQLR	7	PLY65150.1	hypothetical protein LSAT_9X100240 [Lactuca sativa]		hypothetical protein LSAT_9X100240 [Lactuca sativa]	N-Term(iTRAQ8plex); S3(Phospho)	0	S(3): 100.0	193.758	13.61	2	4.12648	1370.73	0.00323868	0.749285	0.703782	0.796707	0.749924	1.22552	1.16138	1.38335	1.25675	0.596718	0.00205851
aADFsEEEDDD	7	XP_023751758.1	glutamic acid-rich protein-like [Lactuca sativa]		glutamic acid-rich protein-like [Lactuca sativa]	N-Term(iTRAQ8plex); S5(Phospho)	0	S(5): 100.0	207.833	61	2	7.54612e-06	1626.6	-1.45247	0.912302	0.902214	0.869501	0.894672	1.08345	1.155	1.06909	1.10251	0.811484	0.00215174
dGGDDsGsDVGGGNNDsDDNLHsPLISR	11	XP_023762187.1	monosaccharide-sensing protein 2-like [Lactuca sativa]		monosaccharide-sensing protein 2-like [Lactuca sativa]	N-Term(iTRAQ8plex); S6(Phospho); S8(Phospho); S17(Phospho); S23(Phospho)	0	S(6): 100.0; S(8): 100.0; S(17): 100.0; S(23): 100.0; S(27): 0.0	359.419	85.38	3	8.47473e-08	3396.23	0.359833	0.827454	0.827061	0.874719	0.843078	1.09521	1.1046	1.21897	1.13959	0.739806	0.00228151
vTSSSTSSTsPMQQSR	6	XP_023764710.1	uncharacterized protein LOC111913223 [Lactuca sativa]		uncharacterized protein LOC111913223 [Lactuca sativa]	N-Term(iTRAQ8plex); S10(Phospho)	0	T(2): 0.0; S(3): 0.0; S(4): 0.1; S(5): 0.1; T(6): 2.6; S(7): 2.6; S(8): 2.6; T(9): 2.6; S(10): 89.6; S(15): 0.0	172.346	14.13	2	3.29185	2054.94	0.030598	0.947948	0.907378	0.871648	0.908991	1.1189	1.07066	1.13378	1.10778	0.820553	0.00241143
aVVTssGGGDsGEAEAER	4	PLY95329.1	hypothetical protein LSAT_8X145000 [Lactuca sativa]		hypothetical protein LSAT_8X145000 [Lactuca sativa]	N-Term(iTRAQ8plex); S5(Phospho); S6(Phospho); S11(Phospho)	0	T(4): 0.1; S(5): 99.9; S(6): 100.0; S(11): 100.0	246.924	46.68	2	0.000500445	2222.86	2.12744	0.758773	0.888851	0.782952	0.810192	1.23954	1.11723	1.25978	1.20552	0.67207	0.00271713
mVAssDEEESSEEk	13	XP_023756396.1	protein RETICULATA-RELATED 3, chloroplastic-like [Lactuca sativa]		protein RETICULATA-RELATED 3, chloroplastic-like [Lactuca sativa]	N-Term(iTRAQ8plex); S4(Phospho); S5(Phospho); K14(iTRAQ8plex)	0	S(4): 100.0; S(5): 100.0; S(10): 0.0; S(11): 0.0	394.501	42.35	3	0.00338784	2324.97	-1.2572	0.861157	0.862149	0.840749	0.854685	1.16904	1.05392	1.19383	1.13893	0.750426	0.00287349
mIssEPtTPk	2	XP_023738749.1	sodium/hydrogen exchanger 2-like [Lactuca sativa]		sodium/hydrogen exchanger 2-like [Lactuca sativa]	N-Term(iTRAQ8plex); S3(Phospho); S4(Phospho); T7(Phospho); K10(iTRAQ8plex)	0	S(3): 100.0; S(4): 100.0; T(7): 2.2; T(8): 97.8	227.593	27.66	3	0.107894	1938.85	-2.23812	0.790532	0.877717	0.783806	0.817351	1.28961	1.16392	1.1267	1.19341	0.684888	0.00288442
gGYSSLQSMGsMGSIGR	2	PLY89751.1	hypothetical protein LSAT_1X50861 [Lactuca sativa]		hypothetical protein LSAT_1X50861 [Lactuca sativa]	N-Term(iTRAQ8plex); S11(Phospho)	0	Y(3): 0.0; S(4): 0.0; S(5): 0.0; S(8): 0.0; S(11): 99.9; S(14): 0.1	157.969	17.14	2	1.37653	2058.92	-2.22648	0.880753	0.910589	0.929378	0.906906	1.07063	1.07441	1.15019	1.09841	0.825654	0.0029145
eADsDsDsNsDsDDETNDQk	2	XP_023759453.1	calcium permeable stress-gated cation channel 1-like [Lactuca sativa]		calcium permeable stress-gated cation channel 1-like [Lactuca sativa]	N-Term(iTRAQ8plex); S4(Phospho); S6(Phospho); S8(Phospho); S10(Phospho); S12(Phospho); K20(iTRAQ8plex)	0	S(4): 100.0; S(6): 100.0; S(8): 100.0; S(10): 99.7; S(12): 100.0; T(16): 0.3	105.716	8.74	3	1.23635	3182.01	-2.50003	0.936146	0.829718	0.814312	0.860059	1.09812	1.1491	1.19596	1.14772	0.749361	0.00378004
lSAADsSGsASGk	5	PLY63199.1	hypothetical protein LSAT_6X60460 [Lactuca sativa]		hypothetical protein LSAT_6X60460 [Lactuca sativa]	N-Term(iTRAQ8plex); S6(Phospho); S9(Phospho); K13(iTRAQ8plex)	0	S(2): 0.0; S(6): 50.7; S(7): 50.7; S(9): 98.5; S(11): 0.1	150.125	21.25	2	0.493805	1905.88	-2.12617	0.844003	0.949249	0.927546	0.906933	1.10445	1.0963	1.1034	1.10138	0.823448	0.00378501
sEPPTQssELNVNsDSEGGPHQPDVPVk	5	PLY82389.1	hypothetical protein LSAT_4X166080 [Lactuca sativa]		hypothetical protein LSAT_4X166080 [Lactuca sativa]	N-Term(iTRAQ8plex); S7(Phospho); S8(Phospho); S14(Phospho); K28(iTRAQ8plex)	0	S(1): 0.2; T(5): 81.6; S(7): 81.6; S(8): 81.6; S(14): 27.5; S(16): 27.5	52.9449	13.71	3	8.45877	3779.67	0.0738089	0.761132	0.814533	0.917196	0.830954	1.13019	1.24932	1.14804	1.17585	0.706683	0.00425271
vILIsPPDSPESsPINETLk	68	XP_023733777.1	uncharacterized protein LOC111881605 [Lactuca sativa]		uncharacterized protein LOC111881605 [Lactuca sativa]	N-Term(iTRAQ8plex); S5(Phospho); S13(Phospho); K20(iTRAQ8plex)	0	S(5): 96.2; S(9): 3.7; S(12): 3.8; S(13): 96.3; T(18): 0.0	215.039	48.18	3	0.00325245	2904.48	-0.97068	0.893845	0.95135	0.862323	0.902506	1.09669	1.06749	1.14872	1.1043	0.817266	0.00461642
qLsIDQFENEGR	4	PLY88840.1	hypothetical protein LSAT_3X115781 [Lactuca sativa]		hypothetical protein LSAT_3X115781 [Lactuca sativa]	N-Term(iTRAQ8plex); S3(Phospho)	0	S(3): 100.0	279.422	40.3	2	0.00672876	1819.85	-1.60954	0.897307	0.899285	0.933543	0.910045	1.04351	1.09362	1.14783	1.09499	0.831102	0.00462521
sEPPTQsSELNVNsDSEGGPHQPDVPVk	6	PLY82389.1	hypothetical protein LSAT_4X166080 [Lactuca sativa]		hypothetical protein LSAT_4X166080 [Lactuca sativa]	N-Term(iTRAQ8plex); S7(Phospho); S14(Phospho); K28(iTRAQ8plex)	0	S(1): 0.0; T(5): 48.3; S(7): 48.3; S(8): 48.3; S(14): 27.5; S(16): 27.5	76.1133	6.68	3	52.6218	3699.71	1.69819	0.953951	0.850931	0.790138	0.865006	1.12448	1.14365	1.16168	1.14327	0.756608	0.00474596
kEGDHHDGGsssssDsD	2	XP_023768019.1	protein SRC1 [Lactuca sativa]		protein SRC1 [Lactuca sativa]	K1(iTRAQ8plex); N-Term(iTRAQ8plex); S10(Phospho); S11(Phospho); S12(Phospho); S13(Phospho); S14(Phospho); S16(Phospho)	1	S(10): 100.0; S(11): 100.0; S(12): 100.0; S(13): 100.0; S(14): 100.0; S(16): 100.0	99.8587	21.66	3	0.0225172	2791.84	-0.495543	0.932951	0.852623	0.833758	0.873111	1.16747	1.16088	1.06339	1.13058	0.772267	0.00475208
nDDDDETsEsDsPSDSLR	4	XP_023730080.1	probable sucrose-phosphate synthase 1 [Lactuca sativa]		probable sucrose-phosphate synthase 1 [Lactuca sativa]	N-Term(iTRAQ8plex); S8(Phospho); S10(Phospho); S12(Phospho)	0	T(7): 99.8; S(8): 96.2; S(10): 3.9; S(12): 99.8; S(14): 0.2; S(16): 0.0	166.034	42.54	2	0.000454106	2527.85	-1.39195	0.828324	0.930519	0.876224	0.878356	1.16479	1.13858	1.06118	1.12152	0.783185	0.00477029
qSsFEALQSATR	9	XP_023730201.1	mannose-1-phosphate guanyltransferase alpha [Lactuca sativa]		mannose-1-phosphate guanyltransferase alpha [Lactuca sativa]	N-Term(iTRAQ8plex); S3(Phospho)	0	S(2): 0.0; S(3): 100.0; S(9): 0.0; T(11): 0.0	311.642	36.12	2	0.0168841	1708.82	-1.25181	0.884038	0.91339	0.902464	0.899964	1.06952	1.0641	1.17255	1.10206	0.81662	0.00510208
gStGFSWk	6	XP_023728401.1	2,3-bisphosphoglycerate-independent phosphoglycerate mutase [Lactuca sativa]		2,3-bisphosphoglycerate-independent phosphoglycerate mutase [Lactuca sativa]	N-Term(Acetyl); T3(Phospho); K8(iTRAQ8plex)	0	S(2): 1.9; T(3): 98.1; S(6): 0.0	131.267	26.74	2	0.056878	1295.6	-0.775052	0.976799	0.879946	0.867192	0.907979	1.09702	1.16172	1.1184	1.12571	0.806581	0.00528277
vHAcVGGTsVR	8	XP_023744324.1	eukaryotic initiation factor 4A-15 [Lactuca sativa]		eukaryotic initiation factor 4A-15 [Lactuca sativa]	N-Term(iTRAQ8plex); C4(Carbamidomethyl); S9(Phospho)	0	T(8): 50.0; S(9): 50.0	146.319	17.09	3	1.14133	1526.74	-1.60133	0.888053	0.836035	0.923607	0.882565	1.13925	1.04398	1.1436	1.10894	0.795862	0.00538059
gGYSSLQSMGsMGsIGR	2	PLY89751.1	hypothetical protein LSAT_1X50861 [Lactuca sativa]		hypothetical protein LSAT_1X50861 [Lactuca sativa]	N-Term(iTRAQ8plex); S11(Phospho); S14(Phospho)	0	Y(3): 0.0; S(4): 0.0; S(5): 0.0; S(8): 0.0; S(11): 100.0; S(14): 100.0	287.93	49.89	2	0.000469236	2138.89	-1.46885	0.81212	0.895078	0.928871	0.87869	1.13767	1.19156	1.06999	1.13308	0.77549	0.00674436
fEDHSETSSsHGGtGVtSAGAVAVPQLPk	24	XP_023759370.1	protein argonaute 4-like isoform X2 [Lactuca sativa]		protein argonaute 4-like isoform X2 [Lactuca sativa]	N-Term(iTRAQ8plex); S10(Phospho); T14(Phospho); T17(Phospho); K29(iTRAQ8plex)	0	S(5): 7.4; T(7): 75.2; S(8): 16.0; S(9): 16.0; S(10): 16.0; T(14): 56.5; T(17): 56.5; S(18): 56.5	103.935	16.83	3	4.57415	3701.69	2.86454	0.908157	0.867837	0.892821	0.889605	1.21003	1.04983	1.15256	1.13747	0.782091	0.00683427
tTSETDFMtEyVVTR	10	XP_023734732.1	mitogen-activated protein kinase homolog NTF6-like isoform X2 [Lactuca sativa]		mitogen-activated protein kinase homolog NTF6-like isoform X2 [Lactuca sativa]	N-Term(iTRAQ8plex); T9(Phospho); Y11(Phospho)	0	T(1): 0.0; T(2): 0.0; S(3): 0.0; T(5): 0.0; T(9): 100.0; Y(11): 100.0; T(14): 0.0	330.97	52.3	2	0.000345946	2243.95	-0.701539	0.863175	0.941359	0.88919	0.897908	1.10544	1.17106	1.04981	1.10877	0.809826	0.00732549
gsMLFPHFGsMFsVTGNQPk	5	XP_023762187.1	monosaccharide-sensing protein 2-like [Lactuca sativa]		monosaccharide-sensing protein 2-like [Lactuca sativa]	N-Term(iTRAQ8plex); S2(Phospho); S10(Phospho); S13(Phospho); K20(iTRAQ8plex)	0	S(2): 100.0; S(10): 100.0; S(13): 97.5; T(15): 2.5	293.543	35.65	3	0.0336798	3017.33	-2.04039	0.847698	0.928406	0.822345	0.86615	1.11217	1.06425	1.2059	1.12744	0.768244	0.00759783
sGSGRPVEASLSSSPsLk	4	XP_023742220.1	uncharacterized protein LOC111890310 [Lactuca sativa]		uncharacterized protein LOC111890310 [Lactuca sativa]	N-Term(iTRAQ8plex); S1(Phospho); S16(Phospho); K18(iTRAQ8plex)	0	S(1): 97.7; S(3): 2.3; S(10): 0.0; S(12): 0.0; S(13): 0.0; S(14): 0.0; S(16): 100.0	321.388	39.38	3	0.0198682	2514.24	-2.41656	0.90373	0.903214	0.873418	0.893454	1.13746	1.04427	1.20525	1.12899	0.791372	0.00784462
tGEsssEEEsEsDSEEETPTPLk	2	XP_023753735.1	STOREKEEPER protein-like [Lactuca sativa]		STOREKEEPER protein-like [Lactuca sativa]	N-Term(iTRAQ8plex); S4(Phospho); S5(Phospho); S6(Phospho); S10(Phospho); S12(Phospho); K23(iTRAQ8plex)	0	T(1): 11.0; S(4): 89.1; S(5): 79.3; S(6): 79.3; S(10): 79.3; S(12): 79.3; S(14): 79.3; T(18): 3.2; T(20): 0.2	61.87	18.51	3	0.402352	3492.26	-1.39133	0.85194	0.886008	0.773942	0.837297	1.05686	1.19582	1.25628	1.16965	0.715852	0.00799748
mDEGYEsGTPEDQETFMk	1	XP_023730707.1	AT-rich interactive domain-containing protein 5-like [Lactuca sativa]		AT-rich interactive domain-containing protein 5-like [Lactuca sativa]	N-Term(iTRAQ8plex); S7(Phospho); K18(iTRAQ8plex)	0	Y(5): 2.9; S(7): 94.2; T(9): 2.9; T(15): 0.0	147.461	18.95	3	1.30152	2782.21	-1.09366	0.826416	0.966093	0.848356	0.880288	1.11667	1.18247	1.08803	1.12906	0.779668	0.00851464
qVsVsPsPVR	4	XP_023759047.1	serine/arginine repetitive matrix protein 1 isoform X2 [Lactuca sativa]		serine/arginine repetitive matrix protein 1 isoform X2 [Lactuca sativa]	N-Term(iTRAQ8plex); S3(Phospho); S5(Phospho); S7(Phospho)	0	S(3): 100.0; S(5): 100.0; S(7): 100.0	168.505	19.54	3	0.363536	1599.69	-1.46828	0.940389	0.844296	0.897459	0.894048	1.17285	1.0925	1.0559	1.10708	0.80757	0.00861399
tVQFVDWcPtGFk	12	XP_023752223.1	tubulin alpha-1 chain-like [Lactuca sativa]		tubulin alpha-1 chain-like [Lactuca sativa]	N-Term(iTRAQ8plex); C8(Carbamidomethyl); T10(Phospho); K13(iTRAQ8plex)	0	T(1): 0.0; T(10): 100.0	272.944	38.05	3	0.023846	2273.12	-1.72332	0.873069	0.907502	0.832222	0.870931	1.10997	1.05068	1.2163	1.12565	0.773712	0.00867285
nAtEDDDEsEVEMLsIssGDEDsVTDQk	2	XP_023748778.1	exocyst complex component SEC5A-like isoform X2 [Lactuca sativa]		exocyst complex component SEC5A-like isoform X2 [Lactuca sativa]	N-Term(iTRAQ8plex); T3(Phospho); S9(Phospho); S15(Phospho); S17(Phospho); S18(Phospho); S23(Phospho); K28(iTRAQ8plex)	0	T(3): 100.0; S(9): 100.0; S(15): 100.0; S(17): 100.0; S(18): 100.0; S(23): 99.8; T(25): 0.2	277.972	58.23	3	5.74952e-05	4133.46	-0.191417	0.950864	0.90181	0.798851	0.883842	1.1497	1.08151	1.11941	1.11687	0.791354	0.00889705
lFVFFAVAPPtPVtAR	1	PLY63173.1	hypothetical protein LSAT_4X158201 [Lactuca sativa]		hypothetical protein LSAT_4X158201 [Lactuca sativa]	N-Term(iTRAQ8plex); T11(Phospho); T14(Phospho)	0	T(11): 100.0; T(14): 100.0	177.188	35.02	2	0.0450758	2197.11	-2.04594	0.848441	0.921201	0.923994	0.897879	1.05866	1.18718	1.09174	1.11253	0.807064	0.00938918
qAGAEstQEE	3	XP_023765666.1	60S ribosomal protein L29-1-like [Lactuca sativa]		60S ribosomal protein L29-1-like [Lactuca sativa]	N-Term(iTRAQ8plex); S6(Phospho); T7(Phospho)	0	S(6): 100.0; T(7): 100.0	179.934	49.95	2	0.000135046	1513.57	-1.2255	0.870179	0.909694	0.929843	0.903238	1.13128	1.01912	1.12879	1.09306	0.826339	0.00974301
kAEssDDsssEEsDSEEEVk	1	XP_023736442.1	nucleolin 1-like isoform X3 [Lactuca sativa]		nucleolin 1-like isoform X3 [Lactuca sativa]	K1(iTRAQ8plex); N-Term(iTRAQ8plex); S4(Phospho); S5(Phospho); S8(Phospho); S9(Phospho); S10(Phospho); S13(Phospho); K20(iTRAQ8plex)	1	S(4): 100.0; S(5): 100.0; S(8): 100.0; S(9): 100.0; S(10): 100.0; S(13): 50.0; S(15): 50.0	272.888	41.34	3	0.00207133	3566.3	2.87852	0.857695	0.744389	0.740015	0.7807	1.27014	1.05842	1.35877	1.22911	0.635175	0.00988453
lMDDNDDGDYsNEDEEk	4	XP_023749623.1	GDP-fucose transporter 1 [Lactuca sativa]		GDP-fucose transporter 1 [Lactuca sativa]	N-Term(iTRAQ8plex); S11(Phospho); K17(iTRAQ8plex)	0	Y(10): 50.0; S(11): 50.0	154.933	22.67	3	0.37258	2692.11	1.03891	0.912626	0.840283	0.96353	0.905479	1.07271	1.14573	1.08229	1.10024	0.822981	0.0101367
aVPPPDssDQELDDDVAPETLLDIVk	12	XP_023733964.1	uncharacterized protein LOC111881803 [Lactuca sativa]		uncharacterized protein LOC111881803 [Lactuca sativa]	N-Term(iTRAQ8plex); S7(Phospho); S8(Phospho); K26(iTRAQ8plex)	0	S(7): 100.0; S(8): 100.0; T(20): 0.0	158.16	44.29	3	0.00936751	3546.71	2.03551	0.943346	0.894036	0.866115	0.901166	1.08547	1.02931	1.14599	1.08692	0.829098	0.0101819
dNAEIsGDEDSEVEEDTGMGSVDLDSTSSGITTEsVI	5	XP_023747383.1	eukaryotic translation initiation factor 2 subunit alpha homolog [Lactuca sativa]		eukaryotic translation initiation factor 2 subunit alpha homolog [Lactuca sativa]	N-Term(iTRAQ8plex); S6(Phospho); S35(Phospho)	0	S(6): 99.2; S(11): 7.0; T(17): 0.8; S(21): 0.8; S(26): 0.8; T(27): 0.8; S(28): 0.8; S(29): 0.8; T(32): 7.0; T(33): 7.0; S(35): 74.9	77.9799	35	3	0.041916	4254.76	5.07673	0.821109	0.892069	0.879754	0.864311	1.10263	1.00524	1.1544	1.08743	0.794822	0.0103165
aAAASNMSNGsPAEsPR	3	XP_023736072.1	dynamin-2B-like [Lactuca sativa]		dynamin-2B-like [Lactuca sativa]	N-Term(iTRAQ8plex); S11(Phospho); S15(Phospho)	0	S(5): 0.0; S(8): 3.8; S(11): 96.2; S(15): 100.0	182.789	23.44	2	0.187952	2081.86	-1.84101	0.963307	0.850658	0.910122	0.908029	1.06197	1.10486	1.17031	1.11238	0.816296	0.0107205
aFGsSMsLPssAAR	4	XP_023768981.1	uncharacterized protein LOC111917536 [Lactuca sativa]		uncharacterized protein LOC111917536 [Lactuca sativa]	N-Term(iTRAQ8plex); S4(Phospho); S7(Phospho); S10(Phospho); S11(Phospho)	0	S(4): 99.9; S(5): 50.1; S(7): 50.1; S(10): 100.0; S(11): 100.0	157.747	26.7	2	0.0279004	1992.73	0.456834	0.927806	0.80491	0.909616	0.880777	1.0612	1.15373	1.0682	1.09438	0.80482	0.0116463
lAGGGNDDDDEDsDkSksEVNDEADEGEsDDEEDDD	4	XP_023741270.1	high mobility group B protein 3-like [Lactuca sativa]		high mobility group B protein 3-like [Lactuca sativa]	N-Term(iTRAQ8plex); S13(Phospho); K15(iTRAQ8plex); K17(iTRAQ8plex); S18(Phospho); S29(Phospho)	2	S(13): 57.0; S(16): 57.0; S(18): 93.0; S(29): 93.0	54.0537	10.76	4	6.212	4984.9	0.411406	0.895355	0.917494	0.793313	0.868721	1.16535	1.04177	1.20656	1.13789	0.763446	0.0126203
iSsTDAMEAWANQQk	7	PLY73606.1	hypothetical protein LSAT_5X93700 [Lactuca sativa]		hypothetical protein LSAT_5X93700 [Lactuca sativa]	N-Term(iTRAQ8plex); S3(Phospho); K15(iTRAQ8plex)	0	S(2): 96.9; S(3): 1.6; T(4): 1.6	267.366	27.58	3	0.254628	2368.15	-0.0404717	0.915072	0.880241	0.895234	0.896849	1.10323	1.00934	1.16025	1.09094	0.822087	0.012644
sGNNLHSFLPFtEEGDQVDsESDVDEDGSLDNDNNTVR	5	XP_023737665.1	auxin transport protein BIG [Lactuca sativa]		auxin transport protein BIG [Lactuca sativa]	N-Term(iTRAQ8plex); T12(Phospho); S20(Phospho)	0	S(1): 0.0; S(7): 0.7; T(12): 63.8; S(20): 63.8; S(22): 63.8; S(29): 7.7; T(36): 0.0	82.3605	11	3	10.0006	4631.9	-3.90886	0.841383	0.715493	0.612753	0.72321	1.36947	1.24772	1.04135	1.21951	0.593032	0.0130026
qGsTINPSGVPLMDPLVTLFGsVHEk	12	XP_023762187.1	monosaccharide-sensing protein 2-like [Lactuca sativa]		monosaccharide-sensing protein 2-like [Lactuca sativa]	N-Term(iTRAQ8plex); S3(Phospho); S22(Phospho); K26(iTRAQ8plex)	0	S(3): 99.9; T(4): 0.1; S(8): 0.0; T(18): 0.0; S(22): 100.0	351.666	51.22	3	0.00214975	3491.75	0.988694	0.89786	0.88791	0.92419	0.90332	1.29578	1.09636	1.12059	1.17091	0.77147	0.0137252
eTNFPDVDTscLAtFTTSDIEDDFLk	10	XP_023735928.1	cyclin-dependent kinase F-1 [Lactuca sativa]		cyclin-dependent kinase F-1 [Lactuca sativa]	N-Term(iTRAQ8plex); S10(Phospho); C11(Carbamidomethyl); T14(Phospho); K26(iTRAQ8plex)	0	T(2): 0.0; T(9): 7.0; S(10): 76.8; T(14): 76.8; T(16): 13.2; T(17): 13.2; S(18): 13.2	113.459	28.53	3	0.282807	3749.67	1.13264	0.940591	0.891658	0.8327	0.888317	1.05805	1.20747	1.07959	1.11504	0.796671	0.0155879
dDsssssDsDDDkISAMk	1	XP_023738480.1	reticulon-like protein B1 [Lactuca sativa]		reticulon-like protein B1 [Lactuca sativa]	N-Term(iTRAQ8plex); S3(Phospho); S4(Phospho); S5(Phospho); S6(Phospho); S7(Phospho); S9(Phospho); K13(iTRAQ8plex); K18(iTRAQ8plex)	1	S(3): 100.0; S(4): 99.8; S(5): 99.8; S(6): 99.8; S(7): 99.8; S(9): 99.8; S(15): 1.0	79.2306	9.44	3	2.36626	3282.17	0.0248254	0.93881	0.830168	0.916362	0.895113	1.15492	1.0272	1.16281	1.11498	0.802809	0.0161898
sESFPSNDssssDDsLEGNkVk	1	XP_023756012.1	C2 domain-containing protein At1g53590-like [Lactuca sativa]		C2 domain-containing protein At1g53590-like [Lactuca sativa]	N-Term(iTRAQ8plex); S9(Phospho); S10(Phospho); S11(Phospho); S12(Phospho); S15(Phospho); K20(iTRAQ8plex); K22(iTRAQ8plex)	1	S(1): 0.0; S(3): 0.6; S(6): 25.0; S(9): 93.6; S(10): 93.6; S(11): 93.6; S(12): 93.6; S(15): 100.0	90.2534	7.53	3	15.3998	3628.47	1.75468	0.754698	0.900491	0.722955	0.792715	1.04444	1.35591	1.24711	1.21582	0.652	0.0164393
ysRsPPPR	1	PLY95693.1	hypothetical protein LSAT_2X53461 [Lactuca sativa]		hypothetical protein LSAT_2X53461 [Lactuca sativa]	N-Term(iTRAQ8plex); S2(Phospho); S4(Phospho)	1	Y(1): 3.4; S(2): 96.7; S(4): 99.9	79.863	10.26	3	3.26365	1423.64	-0.636652	0.861474	0.865768	0.913121	0.880121	1.24845	1.03991	1.10807	1.13214	0.777394	0.0166267
sIISNTSASQAAEtssDsDVEENSPEQIQk	3	XP_023735466.1	UBP1-associated protein 2A-like [Lactuca sativa]		UBP1-associated protein 2A-like [Lactuca sativa]	N-Term(iTRAQ8plex); T14(Phospho); S15(Phospho); S16(Phospho); S18(Phospho); K30(iTRAQ8plex)	0	Too many isoforms		63.2	3	7.72748e-05	4080.72	1.44554	0.868704	0.924093	0.849812	0.88087	0.995119	1.06535	1.13824	1.06624	0.826148	0.0168398
nLsVDEGSFEDk	4	XP_023759795.1	BEACH domain-containing protein C2-like [Lactuca sativa]		BEACH domain-containing protein C2-like [Lactuca sativa]	N-Term(iTRAQ8plex); S3(Phospho); K12(iTRAQ8plex)	0	S(3): 100.0; S(8): 0.0	235.788	33.74	3	0.0423303	2027.97	-4.31697	0.879655	0.933826	0.894034	0.902505	1.15088	1.00156	1.12993	1.09412	0.824868	0.0178674
tHssEssttGDEkPQR	1	XP_023735255.1	protein WVD2-like 5 [Lactuca sativa]		protein WVD2-like 5 [Lactuca sativa]	N-Term(iTRAQ8plex); S3(Phospho); S4(Phospho); S6(Phospho); S7(Phospho); T8(Phospho); T9(Phospho); K13(iTRAQ8plex)	0	T(1): 1.5; S(3): 98.7; S(4): 99.8; S(6): 100.0; S(7): 100.0; T(8): 100.0; T(9): 100.0	104.245	14.74	3	0.459961	2834.99	-2.35498	0.86623	0.9017	0.907481	0.891804	1.17001	1.00242	1.17929	1.11724	0.79822	0.0186581
kEEsssDEEEEssDEEPAkPQAAk	9	XP_023736442.1	nucleolin 1-like isoform X3 [Lactuca sativa]		nucleolin 1-like isoform X3 [Lactuca sativa]	K1(iTRAQ8plex); N-Term(iTRAQ8plex); S4(Phospho); S5(Phospho); S6(Phospho); S12(Phospho); S13(Phospho); K19(iTRAQ8plex); K24(iTRAQ8plex)	1	S(4): 100.0; S(5): 100.0; S(6): 100.0; S(12): 100.0; S(13): 100.0	177.685	24.87	4	0.461711	4252.77	-3.53591	0.936691	0.882546	0.815518	0.878252	1.18225	1.01984	1.20337	1.13515	0.773687	0.0192362
nMNsEsEEEYLDQVSGMPTR	5	XP_023744096.1	G-type lectin S-receptor-like serine/threonine-protein kinase SD2-5 [Lactuca sativa]		G-type lectin S-receptor-like serine/threonine-protein kinase SD2-5 [Lactuca sativa]	N-Term(iTRAQ8plex); S4(Phospho); S6(Phospho)	0	S(4): 100.0; S(6): 100.0; Y(10): 0.0; S(15): 0.0; T(19): 0.0	246.269	38.48	3	0.006776	2780.1	-3.76632	0.844739	0.958474	0.784908	0.862707	1.08114	1.13299	1.02956	1.08123	0.797894	0.0207809
tTPSTPNsDDAAsEGSAPR	7	XP_023745770.1	methyl-CpG-binding domain-containing protein 5-like [Lactuca sativa]		methyl-CpG-binding domain-containing protein 5-like [Lactuca sativa]	N-Term(iTRAQ8plex); S8(Phospho); S13(Phospho)	0	T(1): 0.0; T(2): 0.0; S(4): 0.0; T(5): 0.0; S(8): 100.0; S(13): 99.9; S(16): 0.1	192.852	17.05	2	1.12132	2324.96	1.39717	0.997418	0.824616	0.891816	0.904617	1.10138	1.11168	1.07328	1.09545	0.825796	0.0208474
tEEVStPSsDkR	3	XP_023751521.1	transcriptional regulator DEF1-like [Lactuca sativa]		transcriptional regulator DEF1-like [Lactuca sativa]	N-Term(iTRAQ8plex); T6(Phospho); S9(Phospho); K11(iTRAQ8plex)	1	T(1): 0.0; S(5): 2.4; T(6): 97.6; S(8): 2.4; S(9): 97.6	192.996	11.52	3	7.13502	2103.98	-2.41419	0.929318	0.877437	0.789162	0.865306	1.24111	1.02476	1.13964	1.13517	0.762272	0.0225
atEssEGEEETk	2	XP_023764621.1	anaphase-promoting complex subunit 10 [Lactuca sativa]		anaphase-promoting complex subunit 10 [Lactuca sativa]	N-Term(Acetyl); T2(Phospho); S4(Phospho); S5(Phospho); K12(iTRAQ8plex)	0	T(2): 100.0; S(4): 100.0; S(5): 100.0; T(11): 0.0	218.788	24.93	2	0.0303691	1882.66	2.85277	0.80416	0.964034	0.804068	0.857421	1.10778	1.26757	1.06957	1.14831	0.746682	0.0227029
aDNPADDNDDsEEFssEDDEEEDLPLPVANGk	16	XP_023758093.1	histone deacetylase HDT1 isoform X2 [Lactuca sativa]		histone deacetylase HDT1 isoform X2 [Lactuca sativa]	N-Term(iTRAQ8plex); S11(Phospho); S15(Phospho); S16(Phospho); K32(iTRAQ8plex)	0	S(11): 100.0; S(15): 100.0; S(16): 100.0	224.309	35.45	3	0.0247183	4326.7	-2.34852	0.907672	0.910067	0.895037	0.904259	1.11959	0.990178	1.17083	1.09353	0.826916	0.0247162
aAVDEDDDsDVDLFGEETEEEkk	18	XP_023729654.1	elongation factor 1-delta-like [Lactuca sativa]		elongation factor 1-delta-like [Lactuca sativa]	N-Term(iTRAQ8plex); S9(Phospho); K22(iTRAQ8plex); K23(iTRAQ8plex)	1	S(9): 100.0; T(18): 0.0	443.7	57.17	3	0.000504322	3577.69	4.76896	0.896283	0.88383	0.797748	0.859287	1.07234	1.03381	1.26291	1.12302	0.765157	0.0269835
nDDDDEtSESDsPSDSLR	9	XP_023730080.1	probable sucrose-phosphate synthase 1 [Lactuca sativa]		probable sucrose-phosphate synthase 1 [Lactuca sativa]	N-Term(iTRAQ8plex); T7(Phospho); S12(Phospho)	0	T(7): 49.9; S(8): 49.9; S(10): 0.3; S(12): 99.6; S(14): 0.2; S(16): 0.0	154.27	14.43	3	0.537262	2447.89	-0.710684	0.957618	0.846074	0.923184	0.908959	1.07951	1.19705	1.03684	1.10447	0.822983	0.0282582
eEEtESGDEPtSsGNEAAEEk	6	XP_023763875.1	inactive leucine-rich repeat receptor-like serine/threonine-protein kinase At1g60630 [Lactuca sativa]		inactive leucine-rich repeat receptor-like serine/threonine-protein kinase At1g60630 [Lactuca sativa]	N-Term(iTRAQ8plex); T4(Phospho); T11(Phospho); S13(Phospho); K21(iTRAQ8plex)	0	T(4): 50.0; S(6): 50.0; T(11): 50.9; S(12): 50.9; S(13): 98.3	131.799	17.98	3	0.82158	3073.21	4.03489	0.980247	0.73673	0.822681	0.846552	1.20841	1.26015	1.03597	1.16817	0.72468	0.0308047
gNEssEEDNFFESISGMPVR	3	XP_023750075.1	G-type lectin S-receptor-like serine/threonine-protein kinase SD2-5 [Lactuca sativa]		G-type lectin S-receptor-like serine/threonine-protein kinase SD2-5 [Lactuca sativa]	N-Term(iTRAQ8plex); S4(Phospho); S5(Phospho)	0	S(4): 100.0; S(5): 100.0; S(13): 0.0; S(15): 0.0	155.273	30.68	2	0.0583155	2695.1	4.05573	0.75279	0.937205	0.926181	0.872058	1.06876	1.09476	1.24317	1.13556	0.767953	0.0309637
sLSQPSFFPLDsLPPLsPSPyRDSPSAR	1	PLY91893.1	hypothetical protein LSAT_8X126961 [Lactuca sativa]		hypothetical protein LSAT_8X126961 [Lactuca sativa]	N-Term(iTRAQ8plex); S12(Phospho); S17(Phospho); Y21(Phospho)	1	S(1): 0.4; S(3): 92.9; S(6): 6.2; S(12): 0.4; S(17): 6.7; S(19): 93.3; Y(21): 92.9; S(24): 6.6; S(26): 0.5	156.473	10.17	3	21.7132	3589.64	1.25188	0.882481	0.924835	0.810064	0.87246	1.04218	1.07874	1.27581	1.13224	0.770558	0.0313582
gSMLFPHFGsMFsVTGNQPk	4	XP_023762187.1	monosaccharide-sensing protein 2-like [Lactuca sativa]		monosaccharide-sensing protein 2-like [Lactuca sativa]	N-Term(iTRAQ8plex); S10(Phospho); S13(Phospho); K20(iTRAQ8plex)	0	S(2): 0.0; S(10): 99.8; S(13): 99.8; T(15): 0.3	184.213	21.11	3	1.30961	2937.37	-0.0519728	0.878763	0.959918	0.860826	0.899835	1.05932	1.04505	1.22987	1.11142	0.80963	0.0338494
gsLIsVAGGDmAADAGDVFQAAALVSQPALYSk	2	XP_023762187.1	monosaccharide-sensing protein 2-like [Lactuca sativa]		monosaccharide-sensing protein 2-like [Lactuca sativa]	N-Term(iTRAQ8plex); S2(Phospho); S5(Phospho); M11(Oxidation); K33(iTRAQ8plex)	0	S(2): 100.0; S(5): 100.0; S(26): 0.0; Y(31): 0.0; S(32): 0.0	123.037	12.97	3	14.5721	3964.92	-2.77579	0.808	0.964637	0.925422	0.899353	1.01539	1.14466	1.13536	1.09847	0.818732	0.0338812
gFPPFFSSPSETStPPsESPPMSPMDSSLSR	9	XP_023769821.1	zinc finger CCCH domain-containing protein 20 [Lactuca sativa]		zinc finger CCCH domain-containing protein 20 [Lactuca sativa]	N-Term(iTRAQ8plex); T14(Phospho); S17(Phospho)	0	S(7): 16.9; S(8): 16.9; S(10): 16.9; T(12): 16.9; S(13): 16.9; T(14): 16.9; S(17): 49.3; S(19): 49.3; S(23): 0.1; S(27): 0.0; S(28): 0.0; S(30): 0.0	72.2034	6.19	3	35.9813	3734.59	-3.37348	0.904958	0.978065	0.692428	0.858484	1.17458	1.0662	1.18891	1.14323	0.750929	0.0388325
nEGAktPAGPsPsPsPsPSPsPQR	1	XP_023756422.1	zinc finger CCCH domain-containing protein 3-like [Lactuca sativa]		zinc finger CCCH domain-containing protein 3-like [Lactuca sativa]	N-Term(iTRAQ8plex); K5(iTRAQ8plex); T6(Phospho); S11(Phospho); S13(Phospho); S15(Phospho); S17(Phospho); S21(Phospho)	1	T(6): 100.0; S(11): 100.0; S(13): 100.0; S(15): 100.0; S(17): 100.0; S(19): 1.3; S(21): 98.7	131.227	7.3	3	9.59906	3418.33	-4.43598	1.01509	0.818577	0.710653	0.848108	1.24317	1.0621	1.17359	1.15962	0.731365	0.0396151
nNSsISNssLNHNIEEAIR	5	XP_023754379.1	zinc finger CCCH domain-containing protein 63-like [Lactuca sativa]		zinc finger CCCH domain-containing protein 63-like [Lactuca sativa]	N-Term(iTRAQ8plex); S4(Phospho); S8(Phospho); S9(Phospho)	0	S(3): 50.3; S(4): 50.3; S(6): 19.2; S(8): 90.1; S(9): 90.1	98.2411	3.83	3	32.0643	2643.12	0.789081	0.857676	0.972534	0.860598	0.896936	1.12816	1.20527	0.998101	1.11051	0.807678	0.0401247
aSPPPPsPk	2	XP_023760581.1	formin-like protein 16 [Lactuca sativa]		formin-like protein 16 [Lactuca sativa]	N-Term(iTRAQ8plex); S7(Phospho); K9(iTRAQ8plex)	0	S(2): 0.0; S(7): 100.0	150.674	19.34	3	1.16413	1565.85	-1.48104	0.947977	0.866348	0.91637	0.910232	1.02914	1.20807	1.04699	1.09473	0.831463	0.040258
psDLLSLGTVLGFGVcPTtNDPtIVk	1	PLY68555.1	hypothetical protein LSAT_2X10400 [Lactuca sativa]		hypothetical protein LSAT_2X10400 [Lactuca sativa]	N-Term(Acetyl); S2(Phospho); C16(Carbamidomethyl); T19(Phospho); T23(Phospho); K26(iTRAQ8plex)	0	S(2): 97.7; S(6): 10.3; T(9): 48.0; T(18): 48.0; T(19): 48.0; T(23): 48.0	35.7736	13.82	3	8.74308	3287.54	2.588	0.881596	0.874635	0.892857	0.883029	0.985655	1.11854	1.26704	1.12375	0.78579	0.0417351
rPPsPsPSSSR	7	XP_023745614.1	protein KINESIN LIGHT CHAIN-RELATED 1 [Lactuca sativa]		protein KINESIN LIGHT CHAIN-RELATED 1 [Lactuca sativa]	N-Term(iTRAQ8plex); S4(Phospho); S6(Phospho)	0	S(4): 100.0; S(6): 3.7; S(8): 92.5; S(9): 3.7; S(10): 0.2	100.161	10.59	3	4.1117	1618.73	-1.08733	1.0841	1.10064	1.08147	1.08874	0.953353	0.943226	0.936387	0.944322	1.15293	4.91461e-05
hEDWDEEsVGR	28	XP_023762187.1	monosaccharide-sensing protein 2-like [Lactuca sativa]		monosaccharide-sensing protein 2-like [Lactuca sativa]	N-Term(iTRAQ8plex); S8(Phospho)	0	S(8): 100.0	258.495	33.6	2	0.0149943	1742.73	-2.54048	0.915708	0.931455	0.928093	0.925086	1.06499	1.06919	1.08984	1.07467	0.860808	7.84994e-05
ePPPsSPPSETVNPDLNSSSFsLR	6	PLY89702.1	hypothetical protein LSAT_3X102280 [Lactuca sativa]		hypothetical protein LSAT_3X102280 [Lactuca sativa]	N-Term(iTRAQ8plex); S5(Phospho); S22(Phospho)	0	S(5): 50.0; S(6): 50.0; S(9): 0.0; T(11): 0.0; S(18): 3.1; S(19): 93.9; S(20): 3.1; S(22): 0.0	286.268	34.48	3	0.0483348	3005.34	-1.3402	0.907524	0.921012	0.885769	0.904768	1.07547	1.07843	1.0872	1.08037	0.837461	8.53854e-05
lYLSIEsDsEEER	6	XP_023729792.1	E3 SUMO-protein ligase SIZ1-like isoform X2 [Lactuca sativa]		E3 SUMO-protein ligase SIZ1-like isoform X2 [Lactuca sativa]	N-Term(iTRAQ8plex); S7(Phospho); S9(Phospho)	0	Y(2): 0.0; S(4): 0.0; S(7): 100.0; S(9): 100.0	188.612	30.96	2	0.0378392	2033.86	-3.63112	1.09293	1.06972	1.07874	1.08046	0.934493	0.929304	0.907302	0.9237	1.16971	0.000127609
iTFDsDED	4	XP_023768187.1	DEAD-box ATP-dependent RNA helicase 5 [Lactuca sativa]		DEAD-box ATP-dependent RNA helicase 5 [Lactuca sativa]	N-Term(iTRAQ8plex); S5(Phospho)	0	T(2): 0.0; S(5): 100.0	180.627	54.58	2	5.62565e-05	1325.54	-1.7261	0.933295	0.918246	0.950198	0.933913	1.06388	1.06156	1.05455	1.05999	0.881055	0.000197747
lGssFLSSTLTR	10	XP_023734650.1	amino acid transporter AVT1C-like [Lactuca sativa]		amino acid transporter AVT1C-like [Lactuca sativa]	N-Term(iTRAQ8plex); S3(Phospho); S4(Phospho)	0	S(3): 100.0; S(4): 100.0; S(7): 0.0; S(8): 0.0; T(9): 0.0; T(11): 0.0	246.311	25.97	2	0.181477	1732.82	-1.20101	0.927887	0.919293	0.922801	0.923327	1.09418	1.10689	1.05878	1.08662	0.849725	0.000364502
mEsPQSVVSPLk	4	XP_023739982.1	uncharacterized protein LOC111888105 [Lactuca sativa]		uncharacterized protein LOC111888105 [Lactuca sativa]	N-Term(Acetyl); S3(Phospho); K12(iTRAQ8plex)	0	S(3): 100.0; S(6): 0.0; S(9): 0.0	167.173	35.03	2	0.0250927	1727.86	1.63256	0.937964	0.941045	0.908364	0.929124	1.08956	1.07056	1.10547	1.08853	0.85356	0.00038966
dAAENLVsNSNDNNTNNVSk	9	XP_023733687.1	coilin-like isoform X2 [Lactuca sativa]		coilin-like isoform X2 [Lactuca sativa]	N-Term(iTRAQ8plex); S8(Phospho); K20(iTRAQ8plex)	0	S(8): 48.8; S(10): 48.8; T(15): 2.3; S(19): 0.0	107.08	24.15	3	0.677266	2808.31	-5.30785	0.924004	0.894818	0.933667	0.917496	1.05203	1.06895	1.07702	1.066	0.860691	0.000423339
eGDDYQsDVPGNDDNDDNLQsPLISR	14	XP_023740321.1	monosaccharide-sensing protein 2-like [Lactuca sativa]		monosaccharide-sensing protein 2-like [Lactuca sativa]	N-Term(iTRAQ8plex); S7(Phospho); S21(Phospho)	0	Y(5): 0.1; S(7): 99.9; S(21): 99.9; S(25): 0.1	389.359	68.79	3	1.19577e-05	3342.36	0.164874	0.921332	0.916162	0.941135	0.926209	1.05567	1.04692	1.08164	1.06141	0.872622	0.00046967
ePVYDtSPRsVTR	13	XP_023768517.1	myb-like protein X [Lactuca sativa]		myb-like protein X [Lactuca sativa]	N-Term(iTRAQ8plex); T6(Phospho); S10(Phospho)	1	Y(4): 0.0; T(6): 50.0; S(7): 50.0; S(10): 100.0; T(12): 0.0	353.977	14.07	2	2.95765	1970.89	-0.322624	1.06271	1.05393	1.08586	1.0675	0.944628	0.94554	0.962547	0.950905	1.12261	0.000475326
vDsEsDsDVDVRR	4	XP_023730179.1	ABC transporter F family member 4-like [Lactuca sativa]		ABC transporter F family member 4-like [Lactuca sativa]	N-Term(iTRAQ8plex); S3(Phospho); S5(Phospho); S7(Phospho)	1	S(3): 100.0; S(5): 100.0; S(7): 100.0	174.654	16	2	0.459675	2022.77	-0.91197	0.925267	0.938237	0.949139	0.937548	1.04888	1.06771	1.08655	1.06771	0.878089	0.000539366
eQTksLsGDDEMEEsSPk	2	XP_023745783.1	E3 ubiquitin-protein ligase RBBP6-like [Lactuca sativa]		E3 ubiquitin-protein ligase RBBP6-like [Lactuca sativa]	N-Term(iTRAQ8plex); K4(iTRAQ8plex); S5(Phospho); S7(Phospho); S15(Phospho); K18(iTRAQ8plex)	1	T(3): 3.6; S(5): 96.4; S(7): 100.0; S(15): 50.0; S(16): 50.0	197.92	29.21	3	0.164751	3149.38	0.232532	0.901118	0.953628	0.905558	0.920101	1.09651	1.08491	1.08349	1.0883	0.845446	0.000628141
mEPSsPVEGk	1	PLY87871.1	hypothetical protein LSAT_0X9300 [Lactuca sativa]		hypothetical protein LSAT_0X9300 [Lactuca sativa]	N-Term(Acetyl); S5(Phospho); K10(iTRAQ8plex)	0	S(4): 3.3; S(5): 96.7	69.2347	14.15	2	1.45376	1486.68	-1.5829	0.924082	0.927063	0.956797	0.935981	1.09104	1.07408	1.05583	1.07365	0.871775	0.000700653
mDHssGEEsDFSESEIAEYk	3	XP_023761778.1	factor of DNA methylation 1-like [Lactuca sativa]		factor of DNA methylation 1-like [Lactuca sativa]	N-Term(Acetyl); S4(Phospho); S5(Phospho); S9(Phospho); K20(iTRAQ8plex)	0	S(4): 100.0; S(5): 100.0; S(9): 99.9; S(12): 0.0; S(14): 0.0; Y(19): 0.0	94.8876	9.9	3	1.99542	2863.02	-1.95805	0.943202	0.915223	0.916916	0.925114	1.06335	1.11213	1.0756	1.08369	0.853666	0.000773619
iVksPPDsPGSIk	4	XP_023767388.1	uncharacterized calcium-binding protein C800.10c [Lactuca sativa]		uncharacterized calcium-binding protein C800.10c [Lactuca sativa]	N-Term(iTRAQ8plex); K3(iTRAQ8plex); S4(Phospho); S8(Phospho); K13(iTRAQ8plex)	1	S(4): 100.0; S(8): 99.9; S(11): 0.1	273.88	19.36	3	1.95775	2397.29	-0.547902	0.953566	0.959582	0.932359	0.948502	1.08273	1.0494	1.0772	1.06978	0.886632	0.000781813
lLEtDsD	4	PLY67856.1	hypothetical protein LSAT_9X92380 [Lactuca sativa]		hypothetical protein LSAT_9X92380 [Lactuca sativa]	N-Term(iTRAQ8plex); T4(Phospho); S6(Phospho)	0	T(4): 100.0; S(6): 100.0	150.366	41.3	2	0.00154193	1256.5	-2.17205	1.07904	1.05096	1.06549	1.06516	0.929837	0.962076	0.954734	0.948882	1.12255	0.000786291
vQDVAAVVVPQANVsEGARPESEcGsEDsNSNR	20	XP_023750520.1	uncharacterized protein LOC111898856 [Lactuca sativa]		uncharacterized protein LOC111898856 [Lactuca sativa]	N-Term(iTRAQ8plex); S15(Phospho); C24(Carbamidomethyl); S26(Phospho); S29(Phospho)	0	S(15): 96.4; S(22): 51.8; S(26): 51.8; S(29): 99.4; S(31): 0.6	242.603	32.24	4	0.0839133	4001.69	0.316434	1.05605	1.05417	1.05803	1.05608	0.947586	0.92242	0.964793	0.944933	1.11763	0.000844929
sGSSGLVWDDk	15	XP_023739333.1	uncharacterized protein At1g15400-like [Lactuca sativa]		uncharacterized protein At1g15400-like [Lactuca sativa]	N-Term(iTRAQ8plex); S1(Phospho); K11(iTRAQ8plex)	0	S(1): 49.7; S(3): 49.7; S(4): 0.7	217.398	38.93	2	0.0120518	1838.91	-4.38334	1.12267	1.07527	1.10374	1.10056	0.905536	0.918046	0.952754	0.925446	1.18922	0.000889956
yLNssDDDEEDERR	20	XP_023751135.1	uncharacterized protein LOC111899525 [Lactuca sativa]		uncharacterized protein LOC111899525 [Lactuca sativa]	N-Term(iTRAQ8plex); S4(Phospho); S5(Phospho)	1	Y(1): 0.0; S(4): 100.0; S(5): 100.0	318.876	25.96	3	0.0646458	2206.85	-0.675865	0.930577	0.916137	0.943651	0.930122	1.08435	1.10119	1.05002	1.07852	0.862404	0.000953729
eDAAsHVsGTEPAPVtP	9	XP_023751212.1	65-kDa microtubule-associated protein 1-like [Lactuca sativa]		65-kDa microtubule-associated protein 1-like [Lactuca sativa]	N-Term(iTRAQ8plex); S5(Phospho); S8(Phospho); T16(Phospho)	0	S(5): 100.0; S(8): 100.0; T(10): 0.0; T(16): 100.0	408.365	52.14	2	0.000205277	2208.88	-0.880352	1.05128	1.05497	1.08496	1.06374	0.949439	0.936544	0.913441	0.933141	1.13995	0.000955265
aFsGALtPSQVR	2	XP_023729042.1	uncharacterized protein LOC111876701 [Lactuca sativa]		uncharacterized protein LOC111876701 [Lactuca sativa]	N-Term(iTRAQ8plex); S3(Phospho); T7(Phospho)	0	S(3): 100.0; T(7): 97.2; S(9): 2.8	173.143	11.94	2	4.42697	1697.79	-1.59053	1.11143	1.0536	1.11076	1.09193	0.928033	0.911127	0.89625	0.911803	1.19755	0.00106198
vSstVSESPIVYk	42	XP_023767664.1	mitochondrial import receptor subunit TOM9-2-like [Lactuca sativa]		mitochondrial import receptor subunit TOM9-2-like [Lactuca sativa]	N-Term(iTRAQ8plex); S3(Phospho); T4(Phospho); K13(iTRAQ8plex)	0	S(2): 98.3; S(3): 50.0; T(4): 50.0; S(6): 1.7; S(8): 0.0; Y(12): 0.0	197.077	17.69	3	2.22472	2164.08	-2.06955	0.957337	0.923835	0.910361	0.930511	1.05866	1.09969	1.08728	1.08188	0.86009	0.0012177
lFLFPVSGQsPALtPNHsFGsTDQGR	34	XP_023763038.1	uncharacterized protein LOC111911491 [Lactuca sativa]		uncharacterized protein LOC111911491 [Lactuca sativa]	N-Term(iTRAQ8plex); S10(Phospho); T14(Phospho); S18(Phospho); S21(Phospho)	0	S(7): 0.0; S(10): 100.0; T(14): 100.0; S(18): 100.0; S(21): 95.8; T(22): 4.2	369.138	51.69	3	0.000775561	3384.43	-3.32062	0.95755	0.937548	0.919849	0.938316	1.07089	1.04219	1.07816	1.06375	0.882084	0.00125663
eAsDDEEEVDDDDDVR	4	XP_023761823.1	protein MLN51 homolog [Lactuca sativa]		protein MLN51 homolog [Lactuca sativa]	N-Term(iTRAQ8plex); S3(Phospho)	0	S(3): 100.0	417.553	81.87	2	1.7521e-07	2236.85	-2.58899	1.09688	1.04518	1.07176	1.07127	0.922389	0.887597	0.930717	0.913568	1.17262	0.00137972
fIAPAYAETQPNTVFAEsDsEEEDk	9	XP_023764055.1	WD repeat-containing protein 70 [Lactuca sativa]		WD repeat-containing protein 70 [Lactuca sativa]	N-Term(iTRAQ8plex); S18(Phospho); S20(Phospho); K25(iTRAQ8plex)	0	Y(6): 0.0; T(9): 0.0; T(13): 0.0; S(18): 100.0; S(20): 100.0	420.769	53.71	3	0.000809063	3556.58	-2.95789	0.944817	0.903689	0.944732	0.931079	1.04656	1.04411	1.03609	1.04225	0.893333	0.00138241
lGDGcIsPVsVtSNYsADk	5	PLY76373.1	hypothetical protein LSAT_6X103260 [Lactuca sativa]		hypothetical protein LSAT_6X103260 [Lactuca sativa]	N-Term(iTRAQ8plex); C5(Carbamidomethyl); S7(Phospho); S10(Phospho); T12(Phospho); S16(Phospho); K19(iTRAQ8plex)	0	S(7): 100.0; S(10): 99.5; T(12): 93.4; S(13): 6.7; Y(15): 6.7; S(16): 93.8	160.964	21.49	3	0.538924	2898.19	-0.989064	1.04379	1.06925	1.08506	1.06604	0.916606	0.934465	0.957894	0.936322	1.13854	0.0015679
lTTAssDHTDQVVk	7	XP_023745783.1	E3 ubiquitin-protein ligase RBBP6-like [Lactuca sativa]		E3 ubiquitin-protein ligase RBBP6-like [Lactuca sativa]	N-Term(iTRAQ8plex); S5(Phospho); S6(Phospho); K14(iTRAQ8plex)	0	T(2): 0.0; T(3): 0.1; S(5): 99.9; S(6): 100.0; T(9): 0.0	258.185	19.85	3	1.40314	2270.09	-0.980157	1.10239	1.09345	1.04979	1.08188	0.917776	0.881806	0.934533	0.911371	1.18709	0.00162399
sGGSGFDDVPSsPksPLsPk	8	PLY92192.1	hypothetical protein LSAT_6X52600 [Lactuca sativa]		hypothetical protein LSAT_6X52600 [Lactuca sativa]	N-Term(iTRAQ8plex); S12(Phospho); K14(iTRAQ8plex); S15(Phospho); S18(Phospho); K20(iTRAQ8plex)	1	S(1): 0.0; S(4): 0.0; S(11): 3.9; S(12): 96.4; S(15): 99.9; S(18): 99.9	197.24	15.92	4	5.44083	3098.46	-2.0033	0.94148	0.954787	0.904504	0.93359	1.10582	1.06349	1.06961	1.07964	0.864722	0.00187662
aAtPPEAPHsPAPEQQAGSENPNPk	9	XP_023761830.1	heat shock 70 kDa protein 15-like [Lactuca sativa]		heat shock 70 kDa protein 15-like [Lactuca sativa]	N-Term(iTRAQ8plex); T3(Phospho); S10(Phospho); K25(iTRAQ8plex)	0	T(3): 100.0; S(10): 100.0; S(19): 0.0	274.979	24.05	3	0.882536	3290.54	0.788012	0.925039	0.938359	0.876136	0.913178	1.09905	1.05585	1.0803	1.0784	0.846792	0.00188584
lIHPLPPAISsPETsPER	106	PLY88840.1	hypothetical protein LSAT_3X115781 [Lactuca sativa]		hypothetical protein LSAT_3X115781 [Lactuca sativa]	N-Term(iTRAQ8plex); S11(Phospho); S15(Phospho)	0	S(10): 1.8; S(11): 98.2; T(14): 1.8; S(15): 98.2	374.268	25.9	3	0.433754	2405.18	-1.32427	0.950791	0.953889	0.972711	0.95913	1.01379	1.0244	1.03338	1.02386	0.93678	0.00188796
tGDVATQAQPsTNsEk	11	PLY62833.1	hypothetical protein LSAT_4X19300 [Lactuca sativa]		hypothetical protein LSAT_4X19300 [Lactuca sativa]	N-Term(iTRAQ8plex); S11(Phospho); S14(Phospho); K16(iTRAQ8plex)	0	T(1): 0.0; T(6): 0.0; S(11): 50.0; T(12): 50.0; S(14): 100.0	264.908	19.87	3	1.20452	2402.11	-1.34539	0.96321	0.908977	0.894613	0.922267	1.081	1.06885	1.08697	1.07894	0.854791	0.00190367
rDEEMPTSQtPPYsPk	16	XP_023763234.1	UDP-glucuronic acid decarboxylase 1 [Lactuca sativa]		UDP-glucuronic acid decarboxylase 1 [Lactuca sativa]	N-Term(iTRAQ8plex); T10(Phospho); S14(Phospho); K16(iTRAQ8plex)	1	T(7): 0.0; S(8): 0.0; T(10): 100.0; Y(13): 0.1; S(14): 99.9	363.234	35.54	3	0.0383416	2631.2	-0.0918764	0.950791	0.955027	0.905537	0.937118	1.06848	1.06486	1.10146	1.07826	0.869099	0.00199252
sVLDDDD	6	XP_023732123.1	DNA-binding protein DDB_G0278111 [Lactuca sativa]		DNA-binding protein DDB_G0278111 [Lactuca sativa]	N-Term(iTRAQ8plex); S1(Phospho)	0	S(1): 100.0	164.786	44.6	2	0.000301661	1162.48	-2.82937	1.04387	1.04407	1.03793	1.04196	0.954187	0.982212	0.945021	0.960473	1.08484	0.00200498
vNYVAPPQPPsPVREGSEEGSsPR	34	XP_023733552.1	vesicle-associated protein 1-1-like [Lactuca sativa]		vesicle-associated protein 1-1-like [Lactuca sativa]	N-Term(iTRAQ8plex); S11(Phospho); S22(Phospho)	1	Y(3): 0.0; S(11): 100.0; S(17): 0.0; S(21): 50.0; S(22): 50.0	336.313	20.71	3	1.4279	3000.38	-1.57365	1.07596	1.12517	1.06612	1.08908	0.900814	0.947373	0.93515	0.927779	1.17386	0.00216791
lHsPsPPPRPR	18	XP_023759047.1	serine/arginine repetitive matrix protein 1 isoform X2 [Lactuca sativa]		serine/arginine repetitive matrix protein 1 isoform X2 [Lactuca sativa]	N-Term(iTRAQ8plex); S3(Phospho); S5(Phospho)	0	S(3): 100.0; S(5): 100.0	206.67	7.09	3	15.2243	1704.83	-0.0596692	0.931634	0.90215	0.935488	0.923091	1.09529	1.15454	1.07086	1.10689	0.833947	0.00242707
vILLDsDsGsDER	5	XP_023751392.1	protein RRP6-like 2 [Lactuca sativa]		protein RRP6-like 2 [Lactuca sativa]	N-Term(iTRAQ8plex); S6(Phospho); S8(Phospho); S10(Phospho)	0	S(6): 100.0; S(8): 100.0; S(10): 100.0	287.486	47.34	2	0.00059225	1949.78	-4.81799	1.048	1.07492	1.12315	1.08202	0.910155	0.936342	0.893037	0.913178	1.18489	0.00263322
gPPAsPDsDVIVYPk	2	PLY74578.1	hypothetical protein LSAT_7X31581 [Lactuca sativa]		hypothetical protein LSAT_7X31581 [Lactuca sativa]	N-Term(iTRAQ8plex); S5(Phospho); S8(Phospho); K15(iTRAQ8plex)	0	S(5): 100.0; S(8): 100.0; Y(13): 0.0	136.954	14.76	3	4.71382	2310.13	-0.831346	1.10833	1.08271	1.05753	1.08286	0.950802	0.927376	0.884105	0.920761	1.17605	0.00267636
ePEIEEEDssEmsENEMDPR	4	PLY74960.1	hypothetical protein LSAT_3X98801 [Lactuca sativa]		hypothetical protein LSAT_3X98801 [Lactuca sativa]	N-Term(iTRAQ8plex); S9(Phospho); S10(Phospho); M12(Oxidation); S13(Phospho)	0	S(9): 100.0; S(10): 100.0; S(13): 100.0	132.889	32.03	3	0.0110284	2942.01	-4.1088	1.12051	1.05303	1.07294	1.08216	0.893114	0.944421	0.916523	0.918019	1.1788	0.0027479
nVkPFVEWLQSAEsEsEEE	114	XP_023761543.1	eukaryotic translation initiation factor 5-like [Lactuca sativa]		eukaryotic translation initiation factor 5-like [Lactuca sativa]	N-Term(iTRAQ8plex); K3(iTRAQ8plex); S14(Phospho); S16(Phospho)	0	S(11): 0.0; S(14): 100.0; S(16): 100.0	238.001	50.81	2	0.00126677	3005.37	0.0113865	1.06608	1.04722	1.03459	1.0493	0.938122	0.924026	0.968695	0.943614	1.112	0.00275271
aAADEDEDsDVDLFGEETEEEk	49	XP_023728636.1	elongation factor 1-delta 1-like [Lactuca sativa]		elongation factor 1-delta 1-like [Lactuca sativa]	N-Term(iTRAQ8plex); S9(Phospho); K22(iTRAQ8plex)	0	S(9): 100.0; T(18): 0.0	439.283	95.38	3	3.64051e-08	3131.35	-0.495905	1.07321	1.0415	1.0432	1.05264	0.936469	0.919112	0.966116	0.940566	1.11915	0.00283825
aMAADASVFTFGDDDEDYEsD	38	XP_023754731.1	phosphatidylinositol 3,4,5-trisphosphate 3-phosphatase and protein-tyrosine-phosphatase PTEN2A [Lactuca sativa]		phosphatidylinositol 3,4,5-trisphosphate 3-phosphatase and protein-tyrosine-phosphatase PTEN2A [Lactuca sativa]	N-Term(iTRAQ8plex); S20(Phospho)	0	S(7): 0.0; T(10): 0.0; Y(18): 0.0; S(20): 100.0	227.177	71.11	2	3.59738e-06	2655.03	0.990744	1.01734	1.019	1.02392	1.02009	0.99951	1.00057	0.991226	0.997102	1.02305	0.00294768
sDsDDDELLQmALk	13	XP_023748778.1	exocyst complex component SEC5A-like isoform X2 [Lactuca sativa]		exocyst complex component SEC5A-like isoform X2 [Lactuca sativa]	N-Term(Acetyl); S1(Phospho); S3(Phospho); M11(Oxidation); K14(iTRAQ8plex)	0	S(1): 100.0; S(3): 100.0	322.241	32.56	2	0.0238212	2101.86	-1.62847	1.078	1.12777	1.10492	1.10356	0.913249	0.980463	0.919885	0.937866	1.17668	0.00300929
sPAEFssEDEGk	5	XP_023737051.1	uncharacterized protein LOC111884975 [Lactuca sativa]		uncharacterized protein LOC111884975 [Lactuca sativa]	N-Term(iTRAQ8plex); S6(Phospho); S7(Phospho); K12(iTRAQ8plex)	0	S(1): 0.0; S(6): 100.0; S(7): 100.0	167.593	39.67	2	0.00579934	2050.89	-0.141935	1.0934	1.08602	1.05397	1.0778	0.912236	0.97278	0.92732	0.937445	1.14972	0.00302116
tANAGLEtVGSGLsAVGDVVGLNDDEE	17	XP_023766767.1	uncharacterized protein LOC111915335 [Lactuca sativa]		uncharacterized protein LOC111915335 [Lactuca sativa]	N-Term(iTRAQ8plex); T8(Phospho); S14(Phospho)	0	T(1): 0.0; T(8): 95.8; S(11): 4.2; S(14): 100.0	259.348	65.8	3	3.94409e-05	3053.35	-0.0763656	1.09951	1.06351	1.05045	1.07116	0.882799	0.950819	0.912064	0.915227	1.17037	0.00315403
lIEEVVENDsENESESR	10	XP_023739756.1	metabotropic glutamate receptor-like protein P [Lactuca sativa]		metabotropic glutamate receptor-like protein P [Lactuca sativa]	N-Term(iTRAQ8plex); S10(Phospho)	0	S(10): 100.0; S(14): 0.0; S(16): 0.0	198.379	32.84	2	0.0532216	2362.07	4.74345	0.895473	0.928019	0.944313	0.922602	1.06765	1.12648	1.0594	1.08451	0.850709	0.00316993
yRDsSPPVsPSR	12	XP_023737060.1	pollen-specific leucine-rich repeat extensin-like protein 1 isoform X1 [Lactuca sativa]		pollen-specific leucine-rich repeat extensin-like protein 1 isoform X1 [Lactuca sativa]	N-Term(iTRAQ8plex); S4(Phospho); S9(Phospho)	1	Y(1): 1.7; S(4): 98.2; S(5): 0.0; S(9): 100.0; S(11): 0.0	312.394	41.24	2	0.00402494	1811.8	-0.84996	1.10546	1.05304	1.04351	1.06734	0.948165	0.941289	0.925163	0.938206	1.13764	0.00320654
aMsLPTsPHEFR	13	XP_023741217.1	serine/threonine-protein kinase EDR1-like isoform X2 [Lactuca sativa]		serine/threonine-protein kinase EDR1-like isoform X2 [Lactuca sativa]	N-Term(iTRAQ8plex); S3(Phospho); S7(Phospho)	0	S(3): 100.0; T(6): 2.3; S(7): 97.7	230.852	29.22	2	0.0513402	1836.8	-1.62198	0.917127	0.945858	0.931294	0.931426	1.12587	1.04509	1.09602	1.08899	0.85531	0.00323916
tLSDLNRPTANDsDsDSDGPQEYYTGGEk	11	XP_023742781.1	plant UBX domain-containing protein 4-like [Lactuca sativa]		plant UBX domain-containing protein 4-like [Lactuca sativa]	N-Term(iTRAQ8plex); S13(Phospho); S15(Phospho); K29(iTRAQ8plex)	0	T(1): 0.0; S(3): 0.0; T(9): 0.0; S(13): 99.6; S(15): 94.0; S(17): 6.4; Y(23): 0.0; Y(24): 0.0; T(25): 0.0	209.381	23.61	4	0.85295	3900.7	0.690928	0.958573	0.957017	0.985673	0.967088	1.03805	1.06771	1.04276	1.04951	0.921466	0.00324725
gENFDVYsDPGWsR	7	PLY70257.1	hypothetical protein LSAT_4X116240 [Lactuca sativa]		hypothetical protein LSAT_4X116240 [Lactuca sativa]	N-Term(iTRAQ8plex); S8(Phospho); S13(Phospho)	0	Y(7): 2.0; S(8): 98.0; S(13): 100.0	278.302	36.65	2	0.00721267	2092.83	-0.573425	1.09017	1.07052	1.11521	1.09197	0.962275	0.887319	0.882878	0.910824	1.19888	0.00327297
sYssDDDkPLIFR	6	XP_023748033.1	DNA topoisomerase 1 alpha-like [Lactuca sativa]		DNA topoisomerase 1 alpha-like [Lactuca sativa]	N-Term(Acetyl); S3(Phospho); S4(Phospho); K8(iTRAQ8plex)	0	S(1): 2.3; Y(2): 2.3; S(3): 95.5; S(4): 99.9	229.794	17.23	2	1.04363	2048.89	-0.343249	1.06738	1.04069	1.06288	1.05698	0.963536	0.898767	0.92291	0.928404	1.13849	0.0033701
iEYsDsDsGsDSDLGFR	2	XP_023755868.1	uncharacterized protein LOC111904335 [Lactuca sativa]		uncharacterized protein LOC111904335 [Lactuca sativa]	N-Term(iTRAQ8plex); S4(Phospho); S6(Phospho); S8(Phospho); S10(Phospho)	0	Y(3): 9.1; S(4): 91.0; S(6): 99.9; S(8): 99.1; S(10): 91.1; S(12): 9.8	93.7591	27.32	2	0.0227058	2473.85	4.26376	0.936763	0.958379	0.962108	0.952417	1.07694	1.05594	1.02738	1.05342	0.904119	0.0035212
tGTGPPLsPLAsPGGQNk	10	XP_023760739.1	uncharacterized protein LOC111909188 [Lactuca sativa]		uncharacterized protein LOC111909188 [Lactuca sativa]	N-Term(iTRAQ8plex); S8(Phospho); S12(Phospho); K18(iTRAQ8plex)	0	T(1): 0.0; T(3): 0.0; S(8): 100.0; S(12): 100.0	393.329	55.95	3	0.000419006	2447.22	-0.727296	0.956544	0.956278	0.913569	0.94213	1.06839	1.06876	1.03226	1.05647	0.891772	0.00363737
nVSsVcsIPEmDDFDLTk	2	XP_023768204.1	probable alkaline/neutral invertase D [Lactuca sativa]		probable alkaline/neutral invertase D [Lactuca sativa]	N-Term(iTRAQ8plex); S4(Phospho); C6(Carbamidomethyl); S7(Phospho); M11(Oxidation); K18(iTRAQ8plex)	0	S(3): 50.1; S(4): 50.1; S(7): 99.9; T(17): 0.0	103.512	10.3	3	11.5164	2841.25	-1.6982	1.08419	1.055	1.13426	1.09115	0.930001	0.926312	0.871863	0.909392	1.19987	0.00366125
rDPsAsPVGR	8	XP_023755561.1	serine/arginine-rich splicing factor RS40-like isoform X3 [Lactuca sativa]		serine/arginine-rich splicing factor RS40-like isoform X3 [Lactuca sativa]	N-Term(iTRAQ8plex); S4(Phospho); S6(Phospho)	1	S(4): 100.0; S(6): 100.0	266.007	28.25	3	0.0570066	1505.68	-1.35035	0.952313	0.893243	0.906135	0.91723	1.12674	1.05626	1.07123	1.08475	0.845572	0.00389758
mDssDDEGEEYLFk	7	XP_023748644.1	ras-related protein RABA5c-like [Lactuca sativa]		ras-related protein RABA5c-like [Lactuca sativa]	N-Term(Acetyl); S3(Phospho); S4(Phospho); K14(iTRAQ8plex)	0	S(3): 100.0; S(4): 100.0; Y(11): 0.0	249.927	48.06	2	0.00035249	2170.81	0.528641	1.04555	1.08092	1.06557	1.06401	0.982389	0.972388	0.939233	0.96467	1.10298	0.00390394
sGFDtPAsSTR	2	XP_023768204.1	probable alkaline/neutral invertase D [Lactuca sativa]		probable alkaline/neutral invertase D [Lactuca sativa]	N-Term(iTRAQ8plex); T5(Phospho); S8(Phospho)	0	S(1): 0.0; T(5): 100.0; S(8): 97.7; S(9): 2.3; T(10): 0.1	207.375	20.1	2	0.235026	1589.66	0.559969	1.02362	1.04296	1.07596	1.04751	0.953937	0.961318	0.954958	0.956738	1.09488	0.00419638
eLLGDDsDsEsDDEFk	14	XP_023758611.1	uncharacterized protein LOC111907048 [Lactuca sativa]		uncharacterized protein LOC111907048 [Lactuca sativa]	N-Term(iTRAQ8plex); S7(Phospho); S9(Phospho); S11(Phospho); K16(iTRAQ8plex)	0	S(7): 100.0; S(9): 100.0; S(11): 100.0	467.553	62.5	2	2.15658e-05	2649.04	-0.0317856	1.06132	1.04487	1.05073	1.0523	0.957185	0.935736	0.987449	0.960123	1.09601	0.00425526
sEIMIssDDEEDVDAR	3	XP_023746518.1	uncharacterized protein LOC111894659 [Lactuca sativa]		uncharacterized protein LOC111894659 [Lactuca sativa]	N-Term(iTRAQ8plex); S6(Phospho); S7(Phospho)	0	S(1): 0.0; S(6): 100.0; S(7): 100.0	144.035	29.5	2	0.0374754	2274.91	1.19208	1.02088	1.11274	1.09139	1.075	0.914045	0.912254	0.91151	0.912603	1.17795	0.00426141
lNsGsMPsPPLPEGAVVAR	2	PLY70426.1	hypothetical protein LSAT_1X63041 [Lactuca sativa]		hypothetical protein LSAT_1X63041 [Lactuca sativa]	N-Term(iTRAQ8plex); S3(Phospho); S5(Phospho); S8(Phospho)	0	S(3): 100.0; S(5): 100.0; S(8): 100.0	160.575	11.71	3	6.00667	2423.06	-5.85499	0.915498	0.949779	0.975165	0.946814	1.04102	1.0653	1.06353	1.05662	0.896077	0.00442864
tAPEEVEsPSSVNk	2	XP_023760843.1	nuclear pore complex protein NUP50A-like [Lactuca sativa]		nuclear pore complex protein NUP50A-like [Lactuca sativa]	N-Term(iTRAQ8plex); S8(Phospho); K14(iTRAQ8plex)	0	T(1): 0.0; S(8): 97.6; S(10): 2.4; S(11): 0.1	182.396	26.14	3	0.321294	2162.09	1.03207	0.984179	0.927658	0.934482	0.948773	1.05606	1.04832	1.07087	1.05842	0.896407	0.00447781
eEGVVssDEFsDEER	2	XP_023747445.1	uncharacterized protein LOC111895595 [Lactuca sativa]		uncharacterized protein LOC111895595 [Lactuca sativa]	N-Term(iTRAQ8plex); S6(Phospho); S7(Phospho); S11(Phospho)	0	S(6): 100.0; S(7): 100.0; S(11): 100.0	171.904	22.13	2	0.0967514	2257.81	-0.648089	1.10343	1.04483	1.05995	1.0694	0.927002	0.964202	0.911425	0.934209	1.14471	0.00454829
gNTDTTTAVSSLktPENsP	9	XP_023761827.1	nuclear pore complex protein NUP50A-like [Lactuca sativa]		nuclear pore complex protein NUP50A-like [Lactuca sativa]	N-Term(iTRAQ8plex); K13(iTRAQ8plex); T14(Phospho); S18(Phospho)	1	T(3): 0.0; T(5): 0.0; T(6): 0.0; T(7): 0.0; S(10): 0.0; S(11): 0.0; T(14): 100.0; S(18): 100.0	297.258	43.79	3	0.00658083	2688.26	-1.42436	1.05792	1.10657	1.06843	1.07764	0.921741	0.910867	0.975642	0.936083	1.15122	0.00471961
gLVSYGDIsP	6	XP_023773042.1	peptidyl-prolyl cis-trans isomerase CYP63 isoform X3 [Lactuca sativa]		peptidyl-prolyl cis-trans isomerase CYP63 isoform X3 [Lactuca sativa]	N-Term(iTRAQ8plex); S9(Phospho)	0	S(4): 0.0; Y(5): 0.0; S(9): 100.0	248.24	71.11	2	3.22176e-06	1391.67	-0.919765	0.972474	0.977017	0.934541	0.961344	1.03508	1.06193	1.05215	1.04972	0.915808	0.00476904
vNVNDSSSNsPR	8	XP_023761780.1	26S proteasome regulatory subunit rpn11 [Lactuca sativa]		26S proteasome regulatory subunit rpn11 [Lactuca sativa]	N-Term(iTRAQ8plex); S10(Phospho)	0	S(6): 0.1; S(7): 2.2; S(8): 2.2; S(10): 95.5	194.176	21.35	2	0.420275	1659.76	-0.463341	0.976197	0.962285	0.94519	0.961224	1.06159	1.02231	1.04759	1.04383	0.920861	0.00478156
sPGGGVtPk	3	XP_023749904.1	uncharacterized protein LOC111898209 isoform X2 [Lactuca sativa]		uncharacterized protein LOC111898209 isoform X2 [Lactuca sativa]	N-Term(iTRAQ8plex); S1(Phospho); T7(Phospho); K9(iTRAQ8plex)	0	S(1): 100.0; T(7): 100.0	299.195	29.26	3	0.0971737	1567.77	-1.05636	0.928968	0.943368	0.930216	0.934184	1.10404	1.16245	1.05754	1.10801	0.843118	0.00479503
nIscPVsPIGsPLLHSR	3	XP_023755544.1	mitogen-activated protein kinase kinase kinase YODA-like [Lactuca sativa]		mitogen-activated protein kinase kinase kinase YODA-like [Lactuca sativa]	N-Term(iTRAQ8plex); S3(Phospho); C4(Carbamidomethyl); S7(Phospho); S11(Phospho)	0	S(3): 100.0; S(7): 100.0; S(11): 100.0; S(16): 0.0	232.033	30.02	3	0.0986447	2378.06	-1.80283	0.921086	0.975972	0.910989	0.936016	1.06686	1.04825	1.04775	1.05429	0.887818	0.00501401
vLEQLSGQsPVFSk	5	XP_023732916.1	60S ribosomal protein L11 [Lactuca sativa]		60S ribosomal protein L11 [Lactuca sativa]	N-Term(iTRAQ8plex); S9(Phospho); K14(iTRAQ8plex)	0	S(6): 0.1; S(9): 99.8; S(13): 0.1	142.793	22.73	3	0.732269	2207.19	-2.05529	0.949457	0.976325	0.968544	0.964775	1.04021	1.07531	1.03354	1.04969	0.919106	0.00505629
lQsPHQsPGNTPVDIGk	5	PLY80938.1	hypothetical protein LSAT_8X149701 [Lactuca sativa]		hypothetical protein LSAT_8X149701 [Lactuca sativa]	N-Term(iTRAQ8plex); S3(Phospho); S7(Phospho); K17(iTRAQ8plex)	0	S(3): 100.0; S(7): 100.0; T(11): 0.0	278.914	29.22	3	0.203147	2543.24	-2.69228	0.956296	0.915321	0.94405	0.938556	1.09094	1.03108	1.09517	1.0724	0.875195	0.00506418
eIVSQPPYtEyVSTR	8	XP_023734462.1	cyclin-dependent kinase F-4-like isoform X8 [Lactuca sativa]		cyclin-dependent kinase F-4-like isoform X8 [Lactuca sativa]	N-Term(iTRAQ8plex); T9(Phospho); Y11(Phospho)	0	S(4): 0.1; Y(8): 50.8; T(9): 50.8; Y(11): 98.0; S(13): 0.1; T(14): 0.1	149.547	14.14	2	4.05716	2233.02	2.49578	0.868907	0.939233	0.925706	0.911282	1.10803	1.03613	1.08896	1.07771	0.845575	0.00544465
lVDVGEIPEYILssEEEQEVsAR	36	PLY77529.1	hypothetical protein LSAT_2X86661 [Lactuca sativa]		hypothetical protein LSAT_2X86661 [Lactuca sativa]	N-Term(iTRAQ8plex); S13(Phospho); S14(Phospho); S21(Phospho)	0	Y(10): 0.0; S(13): 100.0; S(14): 100.0; S(21): 100.0	436.478	106.12	2	3.73234e-09	3135.37	-0.93367	1.01314	1.0056	1.02935	1.01603	0.971277	0.96757	0.949208	0.962685	1.05541	0.00548982
aENVSsPsPsQSDSLPDESQVk	6	XP_023745783.1	E3 ubiquitin-protein ligase RBBP6-like [Lactuca sativa]		E3 ubiquitin-protein ligase RBBP6-like [Lactuca sativa]	N-Term(iTRAQ8plex); S6(Phospho); S8(Phospho); S10(Phospho); K22(iTRAQ8plex)	0	S(5): 95.4; S(6): 95.4; S(8): 9.1; S(10): 0.0; S(12): 0.0; S(14): 100.0; S(19): 0.0	131.913	20.13	3	1.1879	3136.35	-3.84889	1.08307	1.0359	1.05012	1.05636	0.974967	0.971444	0.943358	0.963256	1.09666	0.00562117
eYsGsDEDVk	4	XP_023746110.1	uncharacterized protein DDB_G0283697 [Lactuca sativa]		uncharacterized protein DDB_G0283697 [Lactuca sativa]	N-Term(iTRAQ8plex); S3(Phospho); S5(Phospho); K10(iTRAQ8plex)	0	Y(2): 1.7; S(3): 98.3; S(5): 100.0	252.757	36.33	3	0.0118733	1896.81	-2.58959	0.956934	0.945293	0.900707	0.934311	1.12387	1.06919	1.05336	1.08214	0.863393	0.00569818
eDLAALEkDYEEVGLEsGEGEDDEEEEY	10	XP_023757910.1	tubulin alpha chain-like [Lactuca sativa]		tubulin alpha chain-like [Lactuca sativa]	N-Term(iTRAQ8plex); K8(iTRAQ8plex); S17(Phospho)	1	Y(10): 0.0; S(17): 95.7; Y(28): 4.3	191.968	24.51	3	0.664453	3879.68	0.148278	0.907075	0.963518	0.958019	0.94287	1.05897	1.05108	1.0304	1.04682	0.9007	0.00639493
aYFDsADWALGk	1	XP_023741374.1	uncharacterized protein LOC111889457 [Lactuca sativa]		uncharacterized protein LOC111889457 [Lactuca sativa]	N-Term(iTRAQ8plex); S5(Phospho); K12(iTRAQ8plex)	0	Y(2): 0.0; S(5): 100.0	157.019	15.93	3	3.21002	2032	-0.448095	0.907168	0.913257	0.941483	0.920636	1.04701	1.14836	1.07221	1.08919	0.845248	0.00639591
vEEkEEsDDEmGFSLFDD	68	XP_023738100.1	60S acidic ribosomal protein P2-like [Lactuca sativa]		60S acidic ribosomal protein P2-like [Lactuca sativa]	N-Term(iTRAQ8plex); K4(iTRAQ8plex); S7(Phospho); M11(Oxidation)	1	S(7): 100.0; S(14): 0.0	281.65	33.24	3	0.0512181	2825.22	-0.999758	1.05956	1.07286	1.02432	1.05225	0.959502	0.924039	0.968324	0.950621	1.1069	0.00685257
yLDtGDSDsDDsDMHkR	39	XP_023732798.1	eukaryotic translation initiation factor 3 subunit C-like [Lactuca sativa]		eukaryotic translation initiation factor 3 subunit C-like [Lactuca sativa]	N-Term(iTRAQ8plex); T4(Phospho); S9(Phospho); S12(Phospho); K16(iTRAQ8plex)	1	Y(1): 0.0; T(4): 97.1; S(7): 3.0; S(9): 99.9; S(12): 100.0	203.134	22.1	3	0.260511	2805.09	-2.15378	0.931016	0.943712	0.90264	0.925789	1.13691	1.03618	1.12466	1.09925	0.8422	0.00695578
aLVYDsDED	3	XP_023742931.1	protein LEO1 homolog isoform X2 [Lactuca sativa]		protein LEO1 homolog isoform X2 [Lactuca sativa]	N-Term(iTRAQ8plex); S6(Phospho)	0	Y(4): 0.0; S(6): 100.0	169.359	41.89	2	0.00148196	1410.6	-1.98634	1.04768	1.04693	1.1167	1.07044	0.948083	0.958747	0.932581	0.94647	1.13098	0.00702335
tTsEDGsPHAVk	28	XP_023770376.1	epidermal growth factor receptor substrate 15-like 1 isoform X2 [Lactuca sativa]		epidermal growth factor receptor substrate 15-like 1 isoform X2 [Lactuca sativa]	N-Term(iTRAQ8plex); S3(Phospho); S7(Phospho); K12(iTRAQ8plex)	0	T(1): 0.0; T(2): 0.0; S(3): 100.0; S(7): 100.0	251.184	25.07	2	0.280677	1996.92	-3.1675	1.05733	1.08188	1.05954	1.06625	0.935965	0.89354	0.978105	0.93587	1.13932	0.00705555
yTFTASTANAAIEDDsGSEk	9	XP_023762435.1	BAG family molecular chaperone regulator 7 [Lactuca sativa]		BAG family molecular chaperone regulator 7 [Lactuca sativa]	N-Term(iTRAQ8plex); S16(Phospho); K20(iTRAQ8plex)	0	Y(1): 0.0; T(2): 0.0; T(4): 0.1; S(6): 0.1; T(7): 0.0; S(16): 96.4; S(18): 3.3	172.176	33.11	3	0.0760343	2766.29	-0.660187	0.958037	1.00738	0.946461	0.970624	1.0734	1.05884	1.08324	1.07182	0.905582	0.00715017
sVFsVQsEk	2	XP_023767840.1	protein IQ-DOMAIN 1-like [Lactuca sativa]		protein IQ-DOMAIN 1-like [Lactuca sativa]	N-Term(iTRAQ8plex); S4(Phospho); S7(Phospho); K9(iTRAQ8plex)	0	S(1): 0.0; S(4): 100.0; S(7): 100.0	136.62	14.99	2	2.75911	1778.86	0.393116	1.08446	1.04142	1.03818	1.05469	0.970114	0.956287	0.92109	0.949163	1.11118	0.00719755
tEmGAEGGGsPsPSPLSTSk	2	XP_023747909.1	heat shock factor-binding protein 1-like isoform X2 [Lactuca sativa]		heat shock factor-binding protein 1-like isoform X2 [Lactuca sativa]	N-Term(iTRAQ8plex); M3(Oxidation); S10(Phospho); S12(Phospho); K20(iTRAQ8plex)	0	T(1): 0.0; S(10): 100.0; S(12): 0.0; S(14): 99.9; S(17): 0.1; T(18): 0.0; S(19): 0.0	175.741	30.89	3	0.109211	2661.2	1.59332	1.03955	1.03631	1.06644	1.04743	0.983879	0.953032	0.929811	0.955574	1.09613	0.00744866
sNFTYEDTDVsDFEGEPLsPESSTR	5	XP_023729683.1	MLO-like protein 10 isoform X2 [Lactuca sativa]		MLO-like protein 10 isoform X2 [Lactuca sativa]	N-Term(iTRAQ8plex); S11(Phospho); S19(Phospho)	0	S(1): 0.0; T(4): 0.0; Y(5): 0.0; T(8): 0.0; S(11): 100.0; S(19): 100.0; S(22): 0.0; S(23): 0.0; T(24): 0.0	388.448	83.85	3	3.79748e-07	3273.34	0.654213	0.915864	0.934431	0.934609	0.928301	1.01152	0.990292	1.04712	1.01631	0.913403	0.00764992
ncIWNItPsPPR	7	XP_023769081.1	NF-kappa-B-activating protein [Lactuca sativa]		NF-kappa-B-activating protein [Lactuca sativa]	N-Term(iTRAQ8plex); C2(Carbamidomethyl); T7(Phospho); S9(Phospho)	0	T(7): 100.0; S(9): 100.0	307.441	22.51	2	0.350936	1918.86	-0.594945	1.06093	1.0303	1.09514	1.06212	0.924958	0.962412	0.964104	0.950491	1.11745	0.00790606
vGsAGNTSNsVR	3	PLY91820.1	hypothetical protein LSAT_0X840 [Lactuca sativa]		hypothetical protein LSAT_0X840 [Lactuca sativa]	N-Term(iTRAQ8plex); S3(Phospho); S10(Phospho)	0	S(3): 99.8; T(7): 0.4; S(8): 4.1; S(10): 95.7	111.193	17.53	2	0.77794	1612.7	-0.362647	0.923632	0.869185	0.927956	0.906924	1.12713	1.09746	1.02481	1.08313	0.837315	0.00791576
eGNLsSDIVSDs	8	XP_023756227.1	probable inactive receptor kinase RLK902 [Lactuca sativa]		probable inactive receptor kinase RLK902 [Lactuca sativa]	N-Term(iTRAQ8plex); S5(Phospho); S12(Phospho)	0	S(5): 97.4; S(6): 2.6; S(10): 2.6; S(12): 97.4	209.786	35.3	2	0.0063451	1686.67	-3.98007	1.04722	1.12481	1.04313	1.07172	0.951685	0.918113	0.907713	0.925837	1.15757	0.00797434
eFIAssEsEsEsEEDENNk	3	XP_023743988.1	pre-rRNA-processing protein esf1 [Lactuca sativa]		pre-rRNA-processing protein esf1 [Lactuca sativa]	N-Term(iTRAQ8plex); S5(Phospho); S6(Phospho); S8(Phospho); S10(Phospho); S12(Phospho); K19(iTRAQ8plex)	0	S(5): 100.0; S(6): 100.0; S(8): 100.0; S(10): 100.0; S(12): 100.0	98.3853	29.35	3	0.0220675	3168.13	4.07909	0.973524	1.01975	0.984929	0.992736	1.05645	1.06714	1.06353	1.06237	0.934451	0.00812937
gGGGGESEVISPVVVATVGsAPAsPSR	14	XP_023754172.1	la-related protein 1C-like [Lactuca sativa]		la-related protein 1C-like [Lactuca sativa]	N-Term(iTRAQ8plex); S20(Phospho); S24(Phospho)	0	S(7): 0.0; S(11): 0.0; T(17): 0.0; S(20): 100.0; S(24): 99.9; S(26): 0.1	567.76	68.13	3	2.79637e-05	2888.37	-0.192037	0.914989	0.98695	0.899124	0.933688	1.05433	1.08399	1.08179	1.07337	0.869866	0.00819482
vRVsDGPsDTDAR	3	XP_023757853.1	uncharacterized protein LOC111906317 [Lactuca sativa]		uncharacterized protein LOC111906317 [Lactuca sativa]	N-Term(iTRAQ8plex); S4(Phospho); S8(Phospho)	1	S(4): 99.9; S(8): 50.0; T(10): 50.0	134.792	8.69	2	5.92884	1838.8	-0.938962	1.1126	1.07841	1.03826	1.07642	0.966831	0.887455	0.894651	0.916312	1.17473	0.0085294
aPFsSSFPDSVPGTPAYSFAGsPR	5	XP_023770376.1	epidermal growth factor receptor substrate 15-like 1 isoform X2 [Lactuca sativa]		epidermal growth factor receptor substrate 15-like 1 isoform X2 [Lactuca sativa]	N-Term(iTRAQ8plex); S4(Phospho); S22(Phospho)	0	S(4): 0.1; S(5): 0.1; S(6): 3.6; S(10): 96.1; T(14): 0.0; Y(17): 0.0; S(18): 0.0; S(22): 100.0	292.178	39.02	3	0.0164851	2893.27	-1.38487	1.07589	1.01021	1.05389	1.04666	0.953162	0.958695	0.952233	0.954697	1.09633	0.00904565
icLEsAPssPEEGkANEALR	4	XP_023769400.1	putative ribosomal RNA-processing protein 12 [Lactuca sativa]		putative ribosomal RNA-processing protein 12 [Lactuca sativa]	N-Term(iTRAQ8plex); C2(Carbamidomethyl); S5(Phospho); S8(Phospho); S9(Phospho); K14(iTRAQ8plex)	1	S(5): 100.0; S(8): 100.0; S(9): 100.0	281.694	17.86	3	2.6631	3006.36	0.664612	1.03286	1.11227	1.07187	1.07234	0.934641	0.863805	0.940423	0.912956	1.17458	0.00906115
vTSETDFmtEyVVTR	6	XP_023737926.1	mitogen-activated protein kinase homolog MMK1 isoform X2 [Lactuca sativa]		mitogen-activated protein kinase homolog MMK1 isoform X2 [Lactuca sativa]	N-Term(iTRAQ8plex); M8(Oxidation); T9(Phospho); Y11(Phospho)	0	T(2): 0.0; S(3): 0.0; T(5): 0.0; T(9): 100.0; Y(11): 100.0; T(14): 0.0	224.218	53.6	2	0.000278934	2257.97	2.317	1.11426	1.06718	1.03272	1.07139	0.91644	0.964994	0.944969	0.942134	1.13719	0.00932286
qLsGVsDSk	3	XP_023768517.1	myb-like protein X [Lactuca sativa]		myb-like protein X [Lactuca sativa]	N-Term(iTRAQ8plex); S3(Phospho); S6(Phospho); K9(iTRAQ8plex)	0	S(3): 100.0; S(6): 99.9; S(8): 0.1	118.72	9.93	2	7.693	1688.81	-1.5654	0.994103	0.949422	0.980492	0.974673	1.03217	1.03954	1.049	1.04024	0.936972	0.00964284
aSPEkPPPAIIVQPAsPR	11	PLY98846.1	hypothetical protein LSAT_7X20241 [Lactuca sativa]		hypothetical protein LSAT_7X20241 [Lactuca sativa]	N-Term(Acetyl); K5(iTRAQ8plex); S16(Phospho)	0	S(2): 0.0; S(16): 100.0	418.664	46.96	3	0.0028756	2281.23	-0.205714	1.1047	1.02802	1.12237	1.08503	0.906655	0.915738	0.962656	0.928349	1.16877	0.00972557
tSsFGsASSSPSLASLPPIR	66	XP_023759138.1	mediator of RNA polymerase II transcription subunit 15 [Lactuca sativa]		mediator of RNA polymerase II transcription subunit 15 [Lactuca sativa]	N-Term(iTRAQ8plex); S3(Phospho); S6(Phospho)	0	T(1): 0.0; S(2): 3.1; S(3): 96.9; S(6): 100.0; S(8): 0.0; S(9): 0.0; S(10): 0.0; S(12): 0.0; S(15): 0.0	328.113	67.17	2	2.44918e-05	2413.14	1.41323	1.01721	1.06312	1.07699	1.05244	0.962113	0.972609	0.967672	0.967465	1.08784	0.00973919
gVAEAGtssskDDITGAStEGER	3	XP_023749664.1	probable inactive receptor kinase At2g26730 [Lactuca sativa]		probable inactive receptor kinase At2g26730 [Lactuca sativa]	N-Term(iTRAQ8plex); T7(Phospho); S8(Phospho); S9(Phospho); S10(Phospho); K11(iTRAQ8plex); T19(Phospho)	1	T(7): 99.9; S(8): 98.9; S(9): 98.9; S(10): 98.9; T(15): 4.4; S(18): 89.9; T(19): 9.2	76.4664	13.13	3	2.16938	3233.25	-3.4394	1.08855	1.01124	1.09732	1.0657	0.94668	0.927059	0.934968	0.936236	1.13829	0.00977539
vSPDSGYAssNEGAPAAk	1	XP_023762691.1	protein BTR1-like isoform X2 [Lactuca sativa]		protein BTR1-like isoform X2 [Lactuca sativa]	N-Term(Acetyl); S9(Phospho); S10(Phospho); K18(iTRAQ8plex)	0	S(2): 1.7; S(5): 15.5; Y(7): 15.5; S(9): 83.7; S(10): 83.7	52.5392	18.71	2	0.760411	2213.92	-2.75084	0.927543	0.883709	0.985078	0.93211	1.10261	1.0648	1.06887	1.07876	0.864055	0.00983879
nLSsSsISNDLQAISER	44	XP_023768517.1	myb-like protein X [Lactuca sativa]		myb-like protein X [Lactuca sativa]	N-Term(iTRAQ8plex); S4(Phospho); S6(Phospho)	0	S(3): 2.3; S(4): 95.5; S(5): 2.3; S(6): 99.9; S(8): 0.0; S(15): 0.0	397.931	80.32	2	9.11316e-07	2285.04	0.157342	1.03549	1.05519	1.02029	1.03699	0.963826	0.991172	0.959452	0.971483	1.06743	0.00984416
fSFPVtPsTR	4	XP_023745312.1	protein IQ-DOMAIN 14-like isoform X2 [Lactuca sativa]		protein IQ-DOMAIN 14-like isoform X2 [Lactuca sativa]	N-Term(iTRAQ8plex); T6(Phospho); S8(Phospho)	0	S(2): 0.0; T(6): 100.0; S(8): 98.0; T(9): 2.0	202.497	21.8	2	0.261304	1602.73	-0.217792	1.05789	1.09605	1.02803	1.06065	0.971804	0.966852	0.941413	0.960023	1.10482	0.00993783
gGEVQDVDPDPDRVHEsD	6	XP_023772279.1	probable inactive receptor kinase At1g48480 [Lactuca sativa]		probable inactive receptor kinase At1g48480 [Lactuca sativa]	N-Term(iTRAQ8plex); S17(Phospho)	1	S(17): 100.0	284.792	30.48	3	0.0623622	2350.01	-3.52082	1.02677	1.00604	1.04219	1.025	0.931652	0.972765	0.930896	0.945104	1.08454	0.00999368
lSLsLENEILDyLGNSPDADSPAEYLSSR	10	XP_023762854.1	repressor of RNA polymerase III transcription MAF1 homolog [Lactuca sativa]		repressor of RNA polymerase III transcription MAF1 homolog [Lactuca sativa]	N-Term(iTRAQ8plex); S4(Phospho); Y12(Phospho)	0	S(2): 4.9; S(4): 95.1; Y(12): 50.0; S(16): 50.0; S(21): 0.0; Y(25): 0.0; S(27): 0.0; S(28): 0.0	206.987	37.94	3	0.0368311	3632.65	-3.70907	1.14868	1.0647	1.06428	1.09255	0.968312	0.89635	0.932215	0.932292	1.1719	0.0101069
qQVEGVDsV	2	XP_023729284.1	vesicle-associated protein 4-2-like [Lactuca sativa]		vesicle-associated protein 4-2-like [Lactuca sativa]	N-Term(iTRAQ8plex); S8(Phospho)	0	S(8): 100.0	219.833	58.86	2	4.11504e-05	1344.63	-3.40882	1.06091	1.08242	1.1247	1.08934	0.958771	0.936409	0.850232	0.915138	1.19036	0.0101733
aENVssPsPsQsDsLPDESQVk	4	XP_023745783.1	E3 ubiquitin-protein ligase RBBP6-like [Lactuca sativa]		E3 ubiquitin-protein ligase RBBP6-like [Lactuca sativa]	N-Term(iTRAQ8plex); S5(Phospho); S6(Phospho); S8(Phospho); S10(Phospho); S12(Phospho); S14(Phospho); K22(iTRAQ8plex)	0	S(5): 100.0; S(6): 100.0; S(8): 100.0; S(10): 100.0; S(12): 100.0; S(14): 100.0; S(19): 0.0	173.68	38.82	3	0.00530785	3376.26	-0.775175	0.917111	0.942352	0.983076	0.947513	1.05319	1.08996	1.03789	1.06035	0.893587	0.0102157
aALVVVVPEsPEsDGGGGGGGGVEEDAMYSPR	44	PLY63977.1	hypothetical protein LSAT_4X182821 [Lactuca sativa]		hypothetical protein LSAT_4X182821 [Lactuca sativa]	N-Term(iTRAQ8plex); S10(Phospho); S13(Phospho)	0	S(10): 100.0; S(13): 100.0; Y(29): 0.0; S(30): 0.0	173.52	53.28	3	0.000898438	3509.56	3.86309	0.946509	0.993739	0.9388	0.959683	1.05552	1.02998	1.05836	1.04796	0.915767	0.0104146
aALVVVVPEsPEsDGGGGGGGGVEEDAmYsPR	30	PLY63977.1	hypothetical protein LSAT_4X182821 [Lactuca sativa]		hypothetical protein LSAT_4X182821 [Lactuca sativa]	N-Term(iTRAQ8plex); S10(Phospho); S13(Phospho); M28(Oxidation); S30(Phospho)	0	S(10): 99.7; S(13): 95.0; Y(29): 5.5; S(30): 99.7	138.262	38.66	3	0.0152754	3605.49	-5.90673	0.970563	0.963996	0.963162	0.965907	1.00908	1.04138	1.06399	1.03815	0.930412	0.0109356
sESFPSNDssssDDsLEGNk	6	XP_023756012.1	C2 domain-containing protein At1g53590-like [Lactuca sativa]		C2 domain-containing protein At1g53590-like [Lactuca sativa]	N-Term(iTRAQ8plex); S9(Phospho); S10(Phospho); S11(Phospho); S12(Phospho); S15(Phospho); K20(iTRAQ8plex)	0	S(1): 0.0; S(3): 0.0; S(6): 0.1; S(9): 99.9; S(10): 100.0; S(11): 100.0; S(12): 100.0; S(15): 100.0	158.213	43.88	3	0.000724391	3097.09	-0.553512	0.921891	0.907491	0.946108	0.925163	1.13041	1.01904	1.08899	1.07948	0.857045	0.0109359
vVTLHENDDDGSssD	22	XP_023740761.1	phosducin-like protein 3 [Lactuca sativa]		phosducin-like protein 3 [Lactuca sativa]	N-Term(iTRAQ8plex); S13(Phospho); S14(Phospho)	0	T(3): 0.0; S(12): 97.6; S(13): 4.8; S(14): 97.6	275.609	60.37	2	2.46113e-05	2053.79	-0.840023	1.03887	1.08076	1.14306	1.08757	0.884535	0.962585	0.900502	0.915874	1.18746	0.0111722
fDFLTsEPPsPPLsR	10	XP_023741443.1	mechanosensitive ion channel protein 6-like [Lactuca sativa]		mechanosensitive ion channel protein 6-like [Lactuca sativa]	N-Term(iTRAQ8plex); S6(Phospho); S10(Phospho); S14(Phospho)	0	T(5): 5.1; S(6): 95.2; S(10): 99.7; S(14): 100.0	121.621	17.81	2	1.02575	2233.96	1.8534	1.09741	1.07187	1.05093	1.0734	0.987919	0.894585	0.933809	0.938771	1.14341	0.0111927
iSGSNsTTPsNADHR	9	XP_023764849.1	calcium-dependent protein kinase 28-like [Lactuca sativa]		calcium-dependent protein kinase 28-like [Lactuca sativa]	N-Term(iTRAQ8plex); S6(Phospho); S10(Phospho)	0	S(2): 0.0; S(4): 0.3; S(6): 89.9; T(7): 9.8; T(8): 5.2; S(10): 94.8	106.377	14.18	3	1.75312	2007.85	-0.843151	0.907111	0.948168	0.920545	0.925275	1.13785	1.09141	1.02201	1.08376	0.853765	0.0114061
eRVsPEYEHGAIVsPR	15	XP_023755561.1	serine/arginine-rich splicing factor RS40-like isoform X3 [Lactuca sativa]		serine/arginine-rich splicing factor RS40-like isoform X3 [Lactuca sativa]	N-Term(iTRAQ8plex); S4(Phospho); S14(Phospho)	1	S(4): 100.0; Y(7): 0.0; S(14): 100.0	313.593	29.98	3	0.110508	2290.05	-3.28226	0.982353	0.949797	0.997582	0.976578	1.04176	1.03892	1.03597	1.03889	0.940023	0.0117795
lSssLQDFSAYR	3	XP_023748536.1	probable apyrase 7 [Lactuca sativa]		probable apyrase 7 [Lactuca sativa]	N-Term(iTRAQ8plex); S3(Phospho); S4(Phospho)	0	S(2): 3.0; S(3): 97.0; S(4): 100.0; S(9): 0.0; Y(11): 0.0	167.296	23.5	2	0.215972	1837.8	-2.10837	0.920867	0.938992	0.923631	0.92783	1.13009	1.03108	1.04168	1.06762	0.869065	0.01184
gTktDEENEEEDEDDNQMIDAPVMVEASk	14	XP_023735176.1	titin isoform X2 [Lactuca sativa]		titin isoform X2 [Lactuca sativa]	N-Term(iTRAQ8plex); K3(iTRAQ8plex); T4(Phospho); K29(iTRAQ8plex)	1	T(2): 50.0; T(4): 50.0; S(28): 0.0	272.864	27.43	4	0.497244	4260.95	1.28236	0.894992	0.950084	0.939907	0.928327	1.03773	1.06785	1.14205	1.08254	0.857542	0.0120016
lIEEVVENDsENEsESR	31	XP_023739756.1	metabotropic glutamate receptor-like protein P [Lactuca sativa]		metabotropic glutamate receptor-like protein P [Lactuca sativa]	N-Term(iTRAQ8plex); S10(Phospho); S14(Phospho)	0	S(10): 100.0; S(14): 99.9; S(16): 0.1	295.544	64.69	2	2.06832e-05	2442.03	-0.119841	0.97735	0.956798	0.949877	0.961342	1.06277	1.09907	1.0244	1.06208	0.90515	0.0120184
sLsscSSSSSLR	3	PLY78632.1	hypothetical protein LSAT_4X92761 [Lactuca sativa]		hypothetical protein LSAT_4X92761 [Lactuca sativa]	N-Term(iTRAQ8plex); S3(Phospho); S4(Phospho); C5(Carbamidomethyl)	0	S(1): 0.2; S(3): 99.6; S(4): 4.0; S(6): 3.8; S(7): 92.0; S(8): 0.2; S(9): 0.2; S(10): 0.0	126.196	6.24	2	6.63138	1721.71	-2.30114	0.932801	0.931359	0.958636	0.940932	1.05365	1.14082	1.04436	1.07961	0.871547	0.0122809
vILIsPPDsPESsPINETLk	12	XP_023733777.1	uncharacterized protein LOC111881605 [Lactuca sativa]		uncharacterized protein LOC111881605 [Lactuca sativa]	N-Term(iTRAQ8plex); S5(Phospho); S9(Phospho); S13(Phospho); K20(iTRAQ8plex)	0	S(5): 100.0; S(9): 100.0; S(12): 3.5; S(13): 96.5; T(18): 0.0	286.978	58.96	3	0.000272093	2984.45	-1.3612	1.05064	1.09604	1.06237	1.06968	0.881525	0.888644	0.982189	0.917453	1.16593	0.0123658
qLsIHDNR	2	XP_023736072.1	dynamin-2B-like [Lactuca sativa]		dynamin-2B-like [Lactuca sativa]	N-Term(iTRAQ8plex); S3(Phospho)	0	S(3): 100.0	131.267	22.18	3	0.321133	1366.68	-1.98481	0.857799	0.956916	0.960946	0.92522	1.08485	1.08764	1.05741	1.07663	0.859364	0.0124883
fTFVNDAETssPDcIDk	9	XP_023765808.1	filament-like plant protein 4 [Lactuca sativa]		filament-like plant protein 4 [Lactuca sativa]	N-Term(iTRAQ8plex); S10(Phospho); S11(Phospho); C14(Carbamidomethyl); K17(iTRAQ8plex)	0	T(2): 0.0; T(9): 66.7; S(10): 66.7; S(11): 66.7	119.956	25.45	3	0.316035	2714.19	-2.06872	1.05519	1.08155	1.1631	1.09995	0.975073	0.905308	0.909675	0.930019	1.18272	0.0126794
sQQDsEGEPESk	5	XP_023742211.1	uncharacterized protein LOC111890300 [Lactuca sativa]		uncharacterized protein LOC111890300 [Lactuca sativa]	N-Term(iTRAQ8plex); S5(Phospho); K12(iTRAQ8plex)	0	S(1): 0.0; S(5): 100.0; S(11): 0.0	177.162	18.67	3	1.13215	2008.93	-0.455866	1.03734	1.01825	1.02752	1.0277	0.918281	0.980768	0.944484	0.947845	1.08425	0.0135096
dLSTDQQsEDDDSPLtPGR	16	XP_023734110.1	uncharacterized protein LOC111881964 [Lactuca sativa]		uncharacterized protein LOC111881964 [Lactuca sativa]	N-Term(iTRAQ8plex); S8(Phospho); T16(Phospho)	0	S(3): 0.0; T(4): 0.0; S(8): 100.0; S(13): 0.0; T(16): 100.0	439.498	85.98	2	1.55699e-07	2540.04	0.977009	1.04364	1.03804	1.03578	1.03915	0.988605	0.934949	0.914962	0.946172	1.09827	0.0136385
asSSSQLTSGsFR	5	XP_023735104.1	uncharacterized membrane protein At1g16860-like [Lactuca sativa]		uncharacterized membrane protein At1g16860-like [Lactuca sativa]	N-Term(iTRAQ8plex); S2(Phospho); S11(Phospho)	0	S(2): 2.7; S(3): 97.1; S(4): 0.1; S(5): 0.1; T(8): 0.1; S(9): 0.1; S(11): 99.8	201.94	25.43	2	0.11872	1778.76	-1.08465	0.968173	0.926599	0.992328	0.962367	1.09551	1.04286	1.06001	1.06613	0.902676	0.0136394
yAGPGsPPR	1	XP_023760259.1	RNA-binding protein EWS [Lactuca sativa]		RNA-binding protein EWS [Lactuca sativa]	N-Term(iTRAQ8plex); S6(Phospho)	0	Y(1): 0.0; S(6): 100.0	88.6835	3.98	2	14.118	1285.62	-0.234333	1.12919	1.08979	1.02261	1.08053	0.926186	0.957624	0.884389	0.922733	1.17101	0.0138026
mEGGsPDQESVVSGTk	3	XP_023731559.1	uncharacterized protein LOC111879352 [Lactuca sativa]		uncharacterized protein LOC111879352 [Lactuca sativa]	N-Term(Acetyl); M1(Oxidation); S5(Phospho); K16(iTRAQ8plex)	0	S(5): 99.7; S(10): 0.3; S(13): 0.0; T(15): 0.0	79.4304	10.74	2	4.88712	2049.89	-3.11069	1.06204	1.11265	1.02911	1.06793	0.975371	0.910715	0.914469	0.933518	1.14399	0.0138133
aTAAGYAsDGYEtAsETEVGDDDTVSDNSDk	6	XP_023741206.1	tetratricopeptide repeat protein 1-like [Lactuca sativa]		tetratricopeptide repeat protein 1-like [Lactuca sativa]	N-Term(iTRAQ8plex); S8(Phospho); T13(Phospho); S15(Phospho); K31(iTRAQ8plex)	0	T(2): 0.0; Y(6): 0.0; S(8): 5.4; Y(11): 94.6; T(13): 100.0; S(15): 94.6; T(17): 5.4; T(24): 0.0; S(26): 0.0; S(29): 0.0	218.273	68.01	3	1.37015e-05	3989.58	-1.84358	0.964101	0.996906	0.933572	0.96486	1.11253	1.07384	1.04487	1.07708	0.89581	0.0138447
gGFLGSHGcVENGsPSFsPR	2	XP_023758128.1	protein MEI2-like 5 [Lactuca sativa]		protein MEI2-like 5 [Lactuca sativa]	N-Term(iTRAQ8plex); C9(Carbamidomethyl); S14(Phospho); S18(Phospho)	0	S(6): 0.0; S(14): 100.0; S(16): 5.2; S(18): 94.8	158.179	9.32	3	8.08709	2513.06	0.0950723	1.11557	1.08472	1.02411	1.0748	0.890234	0.969164	0.9243	0.927899	1.15832	0.0140915
tcSSPTSPssVLSNMk	3	PLY96390.1	hypothetical protein LSAT_2X37381 [Lactuca sativa]		hypothetical protein LSAT_2X37381 [Lactuca sativa]	N-Term(iTRAQ8plex); C2(Carbamidomethyl); S9(Phospho); S10(Phospho); K16(iTRAQ8plex)	0	T(1): 0.1; S(3): 48.8; S(4): 48.8; T(6): 6.8; S(7): 94.8; S(9): 0.3; S(10): 0.3; S(13): 0.0	67.5963	15.51	3	3.2604	2451.12	0.685209	1.00391	1.07196	1.08173	1.05254	0.92447	0.962807	0.930459	0.939246	1.12062	0.014116
asNEcsPMssPENTSNDRDTSk	3	XP_023754496.1	uncharacterized protein LOC111902918 [Lactuca sativa]		uncharacterized protein LOC111902918 [Lactuca sativa]	N-Term(Acetyl); S2(Phospho); C5(Carbamidomethyl); S6(Phospho); S9(Phospho); S10(Phospho); K22(iTRAQ8plex)	1	S(2): 100.0; S(6): 100.0; S(9): 100.0; S(10): 100.0; T(14): 0.0; S(15): 0.0; T(20): 0.0; S(21): 0.0	149.643	31.82	3	0.0170005	3080.07	2.45783	0.868488	0.927076	0.967307	0.920957	1.08093	1.14419	1.04441	1.08984	0.845035	0.014501
aANAPPEYDsDDEYISGPR	10	XP_023758893.1	tobamovirus multiplication protein 2A-like [Lactuca sativa]		tobamovirus multiplication protein 2A-like [Lactuca sativa]	N-Term(iTRAQ8plex); S10(Phospho)	0	Y(8): 0.0; S(10): 100.0; Y(14): 0.0; S(16): 0.0	347.232	70.58	2	7.24049e-06	2451.06	-3.41314	1.06685	1.04275	1.12174	1.07711	0.876505	0.975636	0.921202	0.924448	1.16514	0.0145194
lSsAPssVssEGIDDQTcEEPk	2	XP_023749608.1	uncharacterized protein LOC111897890 [Lactuca sativa]		uncharacterized protein LOC111897890 [Lactuca sativa]	N-Term(iTRAQ8plex); S3(Phospho); S6(Phospho); S7(Phospho); S9(Phospho); S10(Phospho); C18(Carbamidomethyl); K22(iTRAQ8plex)	0	S(2): 7.7; S(3): 92.6; S(6): 99.9; S(7): 99.9; S(9): 99.9; S(10): 99.9; T(17): 0.0	146.17	31.62	3	0.0287168	3331.25	-3.94961	0.94613	0.973213	0.908503	0.942616	1.02439	1.10322	1.06258	1.0634	0.886419	0.0149197
wDAtPtPGR	3	XP_023763576.1	splicing factor 3B subunit 1 [Lactuca sativa]		splicing factor 3B subunit 1 [Lactuca sativa]	N-Term(iTRAQ8plex); T4(Phospho); T6(Phospho)	0	T(4): 100.0; T(6): 100.0	186.89	18.26	2	0.321697	1464.62	-0.927073	1.04171	1.09443	1.08002	1.07205	0.983108	0.906015	0.86705	0.918724	1.16689	0.0150642
vIsPsPSPNPTLLS	3	XP_023735761.1	uncharacterized protein LOC111883671 [Lactuca sativa]		uncharacterized protein LOC111883671 [Lactuca sativa]	N-Term(iTRAQ8plex); S3(Phospho); S5(Phospho)	0	S(3): 100.0; S(5): 99.9; S(7): 0.2; T(11): 0.0; S(14): 0.0	156.945	19.69	2	1.07345	1872.91	0.974609	0.972026	0.945527	0.965017	0.960857	1.12315	1.10836	1.02735	1.08629	0.884532	0.0152132
tLSDtPPAsPAGstTPVSPFPGGR	9	XP_023746799.1	dormancy-associated protein homolog 3-like isoform X3 [Lactuca sativa]		dormancy-associated protein homolog 3-like isoform X3 [Lactuca sativa]	N-Term(iTRAQ8plex); T5(Phospho); S9(Phospho); S13(Phospho); T14(Phospho)	0	T(1): 0.0; S(3): 5.8; T(5): 94.2; S(9): 94.2; S(13): 0.0; T(14): 5.8; T(15): 100.0; S(18): 100.0	166.713	42.19	3	0.00501881	2921.21	0.343796	1.01883	1.04309	1.09161	1.05118	0.932631	0.974699	0.925689	0.944339	1.11314	0.0153348
sVDPIsPMsSR	1	XP_023739534.1	zinc finger CCCH domain-containing protein 30 [Lactuca sativa]		zinc finger CCCH domain-containing protein 30 [Lactuca sativa]	N-Term(iTRAQ8plex); S6(Phospho); S9(Phospho)	0	S(1): 0.0; S(6): 100.0; S(9): 97.1; S(10): 2.9	148.368	20.31	2	0.287712	1639.7	-4.07286	0.929011	0.963693	0.90027	0.930991	1.08941	1.01653	1.12077	1.07557	0.865581	0.0157858
sNYPFSDVDysPVSMR	1	XP_023735633.1	COP1-interacting protein 7 [Lactuca sativa]		COP1-interacting protein 7 [Lactuca sativa]	N-Term(iTRAQ8plex); Y10(Phospho); S11(Phospho)	0	S(1): 0.0; Y(3): 0.0; S(6): 7.6; Y(10): 96.0; S(11): 96.0; S(14): 0.4	113.354	18.63	2	0.605244	2327.96	-0.046781	1.02898	1.11714	1.04956	1.06523	0.929832	0.97124	0.915529	0.938867	1.13459	0.0158671
tGGATDsPAQSDFtPR	4	XP_023770067.1	RPM1-interacting protein 4-like [Lactuca sativa]		RPM1-interacting protein 4-like [Lactuca sativa]	N-Term(iTRAQ8plex); S7(Phospho); T14(Phospho)	0	T(1): 0.0; T(5): 0.0; S(7): 100.0; S(11): 0.0; T(14): 100.0	242.969	31.62	2	0.0336062	2071.87	1.65939	1.06324	1.07551	1.09411	1.07762	0.985145	0.857867	0.934735	0.925916	1.16385	0.0163455
eVGEATPNsLEsEENIsSSEVDSSVSSk	3	XP_023763264.1	calmodulin-binding transcription activator 3 [Lactuca sativa]		calmodulin-binding transcription activator 3 [Lactuca sativa]	N-Term(iTRAQ8plex); S9(Phospho); S12(Phospho); S17(Phospho); K28(iTRAQ8plex)	0	T(6): 5.3; S(9): 94.4; S(12): 0.3; S(17): 66.6; S(18): 66.6; S(19): 66.6; S(23): 0.1; S(24): 0.1; S(26): 0.0; S(27): 0.0	138.632	44.82	3	0.00546658	3745.62	1.17943	0.912595	0.904995	0.99811	0.938567	1.04334	1.10265	1.11863	1.08821	0.862489	0.0164393
tEMGAEGGGsPsPSPLSTSk	9	XP_023747909.1	heat shock factor-binding protein 1-like isoform X2 [Lactuca sativa]		heat shock factor-binding protein 1-like isoform X2 [Lactuca sativa]	N-Term(iTRAQ8plex); S10(Phospho); S12(Phospho); K20(iTRAQ8plex)	0	T(1): 0.0; S(10): 99.9; S(12): 0.1; S(14): 100.0; S(17): 0.0; T(18): 0.0; S(19): 0.0	209.393	52.87	3	0.000704134	2645.2	-0.43476	0.962878	0.952947	0.978099	0.964641	1.07499	1.05979	1.00946	1.04808	0.92039	0.0167866
sMYGTAGDGsssDEEGVSk	9	PLY66520.1	hypothetical protein LSAT_4X167420 [Lactuca sativa]		hypothetical protein LSAT_4X167420 [Lactuca sativa]	N-Term(iTRAQ8plex); S10(Phospho); S11(Phospho); S12(Phospho); K19(iTRAQ8plex)	0	S(1): 0.0; Y(3): 0.0; T(5): 0.0; S(10): 100.0; S(11): 100.0; S(12): 100.0; S(18): 0.0	339.099	66.68	2	9.57932e-06	2712.07	0.288705	0.972099	0.935687	0.940983	0.94959	1.11402	1.02749	1.1452	1.09557	0.866754	0.0168768
fDFLtSEPPsPPLSR	23	XP_023741443.1	mechanosensitive ion channel protein 6-like [Lactuca sativa]		mechanosensitive ion channel protein 6-like [Lactuca sativa]	N-Term(iTRAQ8plex); T5(Phospho); S10(Phospho)	0	T(5): 97.2; S(6): 2.8; S(10): 99.9; S(14): 0.1	194.872	21.48	3	0.656094	2153.99	0.707922	1.03032	1.03685	1.07998	1.04905	0.962187	0.901156	0.969061	0.944134	1.11112	0.0169354
hQLNsAPStPR	12	XP_023744893.1	protein IQ-DOMAIN 1-like [Lactuca sativa]		protein IQ-DOMAIN 1-like [Lactuca sativa]	N-Term(iTRAQ8plex); S5(Phospho); T9(Phospho)	0	S(5): 100.0; S(8): 2.0; T(9): 98.0	240.079	27.63	3	0.0814595	1671.75	-0.791113	1.06925	1.06751	1.07627	1.07101	0.959665	0.975759	0.863529	0.932984	1.14794	0.0171328
lADSDAtPAGGAtPGAtPAGMAWDAtPk	4	XP_023763576.1	splicing factor 3B subunit 1 [Lactuca sativa]		splicing factor 3B subunit 1 [Lactuca sativa]	N-Term(iTRAQ8plex); T7(Phospho); T13(Phospho); T17(Phospho); T26(Phospho); K28(iTRAQ8plex)	0	S(4): 0.0; T(7): 100.0; T(13): 100.0; T(17): 100.0; T(26): 100.0	194.093	39.09	3	0.0150315	3526.49	-0.570237	1.03635	1.05296	1.07506	1.05479	0.987585	0.973731	0.915669	0.958995	1.09989	0.0179097
fMtEyVVTR	2	XP_023767183.1	mitogen-activated protein kinase homolog NTF3-like isoform X2 [Lactuca sativa]		mitogen-activated protein kinase homolog NTF3-like isoform X2 [Lactuca sativa]	N-Term(iTRAQ8plex); T3(Phospho); Y5(Phospho)	0	T(3): 100.0; Y(5): 100.0; T(8): 0.0	160.327	8.74	2	3.75583	1609.7	0.229857	0.905021	0.931015	0.938143	0.924726	1.00471	1.10899	1.13313	1.08228	0.854426	0.0179323
gNTsAQDVHsVPDLER	16	XP_023759138.1	mediator of RNA polymerase II transcription subunit 15 [Lactuca sativa]		mediator of RNA polymerase II transcription subunit 15 [Lactuca sativa]	N-Term(iTRAQ8plex); S4(Phospho); S10(Phospho)	0	T(3): 2.2; S(4): 97.8; S(10): 100.0	326.321	50.08	2	0.000699986	2188.96	2.85323	1.04428	1.0962	1.05762	1.06603	0.974684	0.905476	0.844087	0.908082	1.17394	0.0179869
fIQWLNEAsEEED	17	PLY93235.1	hypothetical protein LSAT_6X96941 [Lactuca sativa]		hypothetical protein LSAT_6X96941 [Lactuca sativa]	N-Term(iTRAQ8plex); S9(Phospho)	0	S(9): 100.0	265.969	70.63	2	4.8049e-06	1993.87	-0.592976	0.953282	0.998277	0.917672	0.95641	1.05809	1.05817	1.03646	1.05091	0.910082	0.017987
lSEETTLGsPTIEESEk	6	XP_023751758.1	glutamic acid-rich protein-like [Lactuca sativa]		glutamic acid-rich protein-like [Lactuca sativa]	N-Term(iTRAQ8plex); S9(Phospho); K17(iTRAQ8plex)	0	S(2): 0.0; T(5): 0.1; T(6): 0.1; S(9): 99.9; T(11): 0.0; S(15): 0.0	207.862	38.87	3	0.0232714	2538.28	3.15965	0.957048	0.934918	0.959713	0.950559	1.14565	1.04706	1.0484	1.08037	0.879846	0.0180494
aVVTSsGGGDsGEAEAER	12	PLY95329.1	hypothetical protein LSAT_8X145000 [Lactuca sativa]		hypothetical protein LSAT_8X145000 [Lactuca sativa]	N-Term(iTRAQ8plex); S6(Phospho); S11(Phospho)	0	T(4): 0.1; S(5): 50.0; S(6): 50.0; S(11): 99.9	167.157	27.24	2	0.0725933	2142.89	-0.744905	0.914077	0.946719	0.953935	0.938244	1.09148	1.04553	1.00341	1.04681	0.896289	0.0183784
sSQSPSLSGSPsQR	2	XP_023743121.1	uncharacterized protein LOC111891289 [Lactuca sativa]		uncharacterized protein LOC111891289 [Lactuca sativa]	N-Term(iTRAQ8plex); S12(Phospho)	0	S(1): 0.0; S(2): 0.0; S(4): 0.0; S(6): 0.0; S(8): 0.1; S(10): 2.4; S(12): 97.6	204.086	13.55	2	3.2345	1788.84	0.934604	1.09099	1.05786	1.03402	1.06096	0.994465	0.921966	0.910035	0.942155	1.1261	0.0188279
sEVNNEEDEEGsDEDEDDD	1	XP_023772577.1	high mobility group B protein 3-like [Lactuca sativa]		high mobility group B protein 3-like [Lactuca sativa]	N-Term(iTRAQ8plex); S12(Phospho)	0	S(1): 0.0; S(12): 100.0	138.796	57.19	2	2.79794e-05	2554.89	1.03762	0.979372	0.868032	0.967088	0.938164	1.07313	1.06877	1.07329	1.07173	0.875372	0.0193286
aEFsFGNNNINIEGGk	1	XP_023734806.1	probable auxin efflux carrier component 1c [Lactuca sativa]		probable auxin efflux carrier component 1c [Lactuca sativa]	N-Term(iTRAQ8plex); S4(Phospho); K16(iTRAQ8plex)	0	S(4): 100.0	98.5918	5.9	3	44.0566	2399.18	-0.680799	0.956084	0.941825	0.96939	0.955767	1.00347	1.078	1.07441	1.05196	0.908558	0.019667
tPLmAsPGAAGGDEsDNEEEIYk	1	PLY74682.1	hypothetical protein LSAT_5X79561 [Lactuca sativa]		hypothetical protein LSAT_5X79561 [Lactuca sativa]	N-Term(iTRAQ8plex); M4(Oxidation); S6(Phospho); S15(Phospho); K23(iTRAQ8plex)	0	T(1): 7.2; S(6): 92.8; S(15): 100.0; Y(22): 0.0	92.5928	8.25	3	19.87	3165.38	-0.910481	1.12992	1.06291	1.01272	1.06851	0.928102	0.955824	0.92033	0.934752	1.1431	0.0198531
mEsPGPETVVAk	5	XP_023746666.1	diacylglycerol kinase 4-like [Lactuca sativa]		diacylglycerol kinase 4-like [Lactuca sativa]	N-Term(Acetyl); S3(Phospho); K12(iTRAQ8plex)	0	S(3): 100.0; T(8): 0.0	214.684	46.33	2	0.00155167	1670.8	-0.0779087	1.12489	0.992673	1.10387	1.07381	0.90256	0.87378	0.937967	0.904769	1.18683	0.01987
gsMLFPHFGsMFsVTGNQEk	5	XP_023740321.1	monosaccharide-sensing protein 2-like [Lactuca sativa]		monosaccharide-sensing protein 2-like [Lactuca sativa]	N-Term(iTRAQ8plex); S2(Phospho); S10(Phospho); S13(Phospho); K20(iTRAQ8plex)	0	S(2): 100.0; S(10): 100.0; S(13): 99.8; T(15): 0.2	284.147	39.54	3	0.0137521	3049.32	-1.3059	0.880288	0.934939	0.954692	0.923306	1.00853	1.09481	1.11918	1.07417	0.859551	0.0200116
fGLsEDGGsVFk	2	XP_023758117.1	guanylate-binding protein 4-like [Lactuca sativa]		guanylate-binding protein 4-like [Lactuca sativa]	N-Term(iTRAQ8plex); S4(Phospho); S9(Phospho); K12(iTRAQ8plex)	0	S(4): 100.0; S(9): 100.0	109.21	4.63	2	39.8413	2010.94	0.235723	1.09431	1.05375	1.08668	1.07824	0.953379	0.974839	0.849009	0.925743	1.16473	0.0201719
ttSSIGDIPILGSIFGk	16	XP_023757787.1	uncharacterized protein LOC111906258 isoform X2 [Lactuca sativa]		uncharacterized protein LOC111906258 isoform X2 [Lactuca sativa]	N-Term(iTRAQ8plex); T2(Phospho); K17(iTRAQ8plex)	0	T(1): 2.7; T(2): 94.5; S(3): 2.7; S(4): 0.1; S(13): 0.0	225.314	19.04	3	1.95403	2394.3	-4.67762	1.03491	1.06474	1.07112	1.05692	0.906309	0.940497	0.998329	0.948378	1.11445	0.0202548
mVDASDsEDsGSESGSAP	2	XP_023736464.1	uncharacterized protein LOC111884381 [Lactuca sativa]		uncharacterized protein LOC111884381 [Lactuca sativa]	N-Term(iTRAQ8plex); S7(Phospho); S10(Phospho)	0	S(5): 50.1; S(7): 50.1; S(10): 99.8; S(12): 0.0; S(14): 0.0; S(16): 0.0	152.919	40.5	2	0.00114971	2191.79	-2.64913	0.937388	0.953685	0.870172	0.920415	1.13138	1.12034	1.01428	1.08867	0.845451	0.0204891
mHGsDDDsDIDVR	1	XP_023730179.1	ABC transporter F family member 4-like [Lactuca sativa]		ABC transporter F family member 4-like [Lactuca sativa]	M1(Oxidation); N-Term(iTRAQ8plex); S4(Phospho); S8(Phospho)	0	S(4): 100.0; S(8): 100.0	156.205	34.94	2	0.005114	1941.72	-0.51925	0.936014	0.863474	0.998509	0.932666	1.07704	1.06973	1.08788	1.07822	0.865007	0.0208933
nPPPsPAPPPLAsPVNPQR	8	XP_023762885.1	golgin subfamily A member 6-like protein 22 [Lactuca sativa]		golgin subfamily A member 6-like protein 22 [Lactuca sativa]	N-Term(iTRAQ8plex); S5(Phospho); S13(Phospho)	0	S(5): 100.0; S(13): 100.0	407.9	18.04	3	2.39402	2397.17	-0.608941	1.12743	1.05454	1.03635	1.07277	0.967488	0.868693	0.936291	0.924158	1.16081	0.0210707
tTPQTDsPsDSEk	1	XP_023754799.1	DEAD-box ATP-dependent RNA helicase 7 [Lactuca sativa]		DEAD-box ATP-dependent RNA helicase 7 [Lactuca sativa]	N-Term(iTRAQ8plex); S7(Phospho); S9(Phospho); K13(iTRAQ8plex)	0	T(1): 0.0; T(2): 0.0; T(5): 0.0; S(7): 100.0; S(9): 99.9; S(11): 0.1	154.391	14.83	3	2.42035	2160.95	-0.667008	0.991359	0.964282	0.956884	0.970842	1.03533	1.06279	1.01232	1.03681	0.936371	0.0213353
dmIQPASHGsILsVR	6	XP_023762187.1	monosaccharide-sensing protein 2-like [Lactuca sativa]		monosaccharide-sensing protein 2-like [Lactuca sativa]	N-Term(iTRAQ8plex); M2(Oxidation); S10(Phospho); S13(Phospho)	0	S(7): 0.0; S(10): 100.0; S(13): 100.0	276.6	25.78	3	0.258824	2090.97	0.739618	0.949978	0.955926	0.909143	0.938349	1.0903	1.00142	1.04906	1.04693	0.896288	0.021403
dVSALDtsEVSDDEEDDIVGEk	3	XP_023732365.1	alpha-1,4 glucan phosphorylase L-1 isozyme, chloroplastic/amyloplastic [Lactuca sativa]		alpha-1,4 glucan phosphorylase L-1 isozyme, chloroplastic/amyloplastic [Lactuca sativa]	N-Term(iTRAQ8plex); T7(Phospho); S8(Phospho); K22(iTRAQ8plex)	0	S(3): 0.0; T(7): 96.5; S(8): 99.9; S(11): 3.6	150.861	17.9	3	2.37838	3135.37	1.02999	1.09361	1.05249	1.08428	1.0768	0.989623	0.854934	0.935015	0.926524	1.16219	0.0215592
sFAPGDNEDsGsDEPDR	4	PLY69290.1	hypothetical protein LSAT_7X78081 [Lactuca sativa]		hypothetical protein LSAT_7X78081 [Lactuca sativa]	N-Term(iTRAQ8plex); S10(Phospho); S12(Phospho)	0	S(1): 0.0; S(10): 100.0; S(12): 100.0	219.805	49.03	2	0.000258804	2258.85	3.04483	1.12676	1.07375	0.99851	1.06634	0.919835	0.938031	0.860448	0.906105	1.17684	0.0218792
dMIHPAsSIIsMR	23	XP_023740321.1	monosaccharide-sensing protein 2-like [Lactuca sativa]		monosaccharide-sensing protein 2-like [Lactuca sativa]	N-Term(iTRAQ8plex); S7(Phospho); S11(Phospho)	0	S(7): 50.0; S(8): 50.0; S(11): 100.0	157.729	21.8	3	0.357435	1921.86	-0.79377	0.982708	0.965746	0.939676	0.96271	1.00734	1.06716	1.04909	1.0412	0.924619	0.0223865
mASMFGDssGDEGEIDE	8	XP_023767400.1	uncharacterized protein LOC111916000 [Lactuca sativa]		uncharacterized protein LOC111916000 [Lactuca sativa]	M1(Oxidation); N-Term(iTRAQ8plex); S8(Phospho); S9(Phospho)	0	S(3): 0.0; S(8): 100.0; S(9): 100.0	183.95	53.49	2	5.32779e-05	2256.8	3.36982	1.07993	1.02027	1.05298	1.05106	0.993351	0.91994	0.938714	0.950668	1.1056	0.0229814
eMNENETPLTYsGTGFPEk	5	PLY70257.1	hypothetical protein LSAT_4X116240 [Lactuca sativa]		hypothetical protein LSAT_4X116240 [Lactuca sativa]	N-Term(iTRAQ8plex); S12(Phospho); K19(iTRAQ8plex)	0	T(7): 0.9; T(10): 0.9; Y(11): 32.7; S(12): 32.7; T(14): 32.7	172.695	36.66	3	0.0362285	2832.32	-1.58032	1.11674	1.03233	1.06367	1.07091	0.989473	0.916302	0.888951	0.931575	1.14957	0.0229839
lFLFPVSGQsPALtPNHSFGSTDQGR	29	XP_023763038.1	uncharacterized protein LOC111911491 [Lactuca sativa]		uncharacterized protein LOC111911491 [Lactuca sativa]	N-Term(iTRAQ8plex); S10(Phospho); T14(Phospho)	0	S(7): 0.0; S(10): 100.0; T(14): 98.1; S(18): 1.9; S(21): 0.0; T(22): 0.0	410.166	56.67	3	0.000443796	3224.52	2.96426	0.88079	1.00447	0.939325	0.941527	1.09812	1.08003	1.05442	1.07752	0.873787	0.0230008
eLAQQSsTPSsPMk	31	XP_023763315.1	protein MODIFIER OF SNC1 1 [Lactuca sativa]		protein MODIFIER OF SNC1 1 [Lactuca sativa]	N-Term(iTRAQ8plex); S7(Phospho); S11(Phospho); K14(iTRAQ8plex)	0	S(6): 2.0; S(7): 98.0; T(8): 0.0; S(10): 0.0; S(11): 100.0	278.134	40.19	3	0.0105818	2259.06	-0.913825	1.02048	1.08523	1.03048	1.0454	0.98484	0.951491	0.956212	0.964181	1.08423	0.0230829
aSsDsEEEEQDVQQk	8	XP_023752638.1	splicing factor 3B subunit 2 [Lactuca sativa]		splicing factor 3B subunit 2 [Lactuca sativa]	N-Term(iTRAQ8plex); S3(Phospho); S5(Phospho); K15(iTRAQ8plex)	0	S(2): 2.1; S(3): 97.9; S(5): 100.0	273.7	41.48	2	0.00579995	2477.05	-1.26287	0.954893	0.955714	0.968015	0.959541	1.10103	1.02906	1.02193	1.05067	0.913264	0.0236452
nSDGGsDNsDEDEVDGVLESLVk	13	XP_023755515.1	COP1-interacting protein 7 [Lactuca sativa]		COP1-interacting protein 7 [Lactuca sativa]	N-Term(iTRAQ8plex); S6(Phospho); S9(Phospho); K23(iTRAQ8plex)	0	S(2): 0.1; S(6): 99.9; S(9): 100.0; S(20): 0.0	313.272	45.93	3	0.00354187	3148.37	-0.761067	1.04885	1.0852	1.05096	1.06167	0.930433	0.905676	1.00542	0.947177	1.12088	0.0237206
lQSYADIDLPPsDDEEDDDAEYEsGEEVQk	26	XP_023763869.1	ABC transporter F family member 4-like [Lactuca sativa]		ABC transporter F family member 4-like [Lactuca sativa]	N-Term(iTRAQ8plex); S12(Phospho); S24(Phospho); K30(iTRAQ8plex)	0	S(3): 0.0; Y(4): 0.0; S(12): 99.9; Y(22): 2.3; S(24): 97.7	260.989	42.85	3	0.00930468	4169.78	4.41257	0.897804	0.947414	0.919815	0.921678	0.988309	1.07933	1.01836	1.02867	0.895992	0.0244148
gFPPFFSSPSETSTPPsEsPPMsPMDSSLSR	3	XP_023769821.1	zinc finger CCCH domain-containing protein 20 [Lactuca sativa]		zinc finger CCCH domain-containing protein 20 [Lactuca sativa]	N-Term(iTRAQ8plex); S17(Phospho); S19(Phospho); S23(Phospho)	0	Too many isoforms		21.76	3	0.785165	3814.57	0.883524	0.86067	1.01055	0.892017	0.92108	1.11837	1.11318	1.05657	1.09604	0.84037	0.0245177
kSPFGFDDsVPGsPASR	2	XP_023754119.1	epidermal growth factor receptor substrate 15-like 1 [Lactuca sativa]		epidermal growth factor receptor substrate 15-like 1 [Lactuca sativa]	K1(iTRAQ8plex); N-Term(iTRAQ8plex); S9(Phospho); S13(Phospho)	1	S(2): 0.0; S(9): 100.0; S(13): 99.7; S(16): 0.3	112.057	21.95	3	0.884314	2519.18	-1.45638	1.01272	1.0445	1.08469	1.04731	0.92788	0.981136	0.959292	0.956103	1.09539	0.0245203
dVSGAPVIDIDssDDDscssGDGIk	3	XP_023771543.1	protein MICRORCHIDIA 7-like [Lactuca sativa]		protein MICRORCHIDIA 7-like [Lactuca sativa]	N-Term(iTRAQ8plex); S12(Phospho); S13(Phospho); S17(Phospho); C18(Carbamidomethyl); S19(Phospho); S20(Phospho); K25(iTRAQ8plex)	0	S(3): 0.1; S(12): 100.0; S(13): 100.0; S(17): 100.0; S(19): 100.0; S(20): 100.0	82.9025	21.58	3	0.281485	3519.31	-0.690475	0.969421	0.880736	0.924421	0.92486	1.08779	1.04382	1.00739	1.04633	0.883905	0.0246053
sDsDDDELLQMALk	18	XP_023748778.1	exocyst complex component SEC5A-like isoform X2 [Lactuca sativa]		exocyst complex component SEC5A-like isoform X2 [Lactuca sativa]	N-Term(Acetyl); S1(Phospho); S3(Phospho); K14(iTRAQ8plex)	0	S(1): 100.0; S(3): 100.0	408.706	38.69	2	0.00594236	2085.86	-0.567435	1.06125	1.02727	1.02591	1.03815	0.949877	0.949228	1.00033	0.966479	1.07415	0.0249807
dYEEVGLEsGEGEDDEEEEY	14	XP_023757910.1	tubulin alpha chain-like [Lactuca sativa]		tubulin alpha chain-like [Lactuca sativa]	N-Term(iTRAQ8plex); S9(Phospho)	0	Y(2): 0.0; S(9): 100.0; Y(20): 0.0	158.8	82.59	2	1.55603e-07	2706.03	0.357992	1.06058	1.01133	1.01305	1.02832	0.970068	0.951937	0.976838	0.966281	1.06421	0.0250864
lVVTLDPHQGYssDsD	15	XP_023743294.1	protein misato homolog 1 [Lactuca sativa]		protein misato homolog 1 [Lactuca sativa]	N-Term(iTRAQ8plex); S12(Phospho); S13(Phospho); S15(Phospho)	0	T(4): 0.0; Y(11): 0.0; S(12): 100.0; S(13): 100.0; S(15): 100.0	275.226	42.59	2	0.00211235	2276.91	-0.0256576	0.91973	0.926106	0.928483	0.924773	1.16938	1.06848	1.0137	1.08385	0.853229	0.0252752
mEITksGAEDE	2	XP_023765200.1	14-3-3 protein 9-like [Lactuca sativa]		14-3-3 protein 9-like [Lactuca sativa]	N-Term(iTRAQ8plex); K5(iTRAQ8plex); S6(Phospho)	1	T(4): 2.5; S(6): 97.5	144.924	20.64	3	0.72145	1897.9	-4.39394	0.940691	0.916834	0.925277	0.927601	1.12974	0.992823	1.10774	1.07677	0.861469	0.0256451
eTSIsPPsSPPSSTAATTNTTLGEVIEQPEk	9	XP_023756854.1	patellin-3-like [Lactuca sativa]		patellin-3-like [Lactuca sativa]	N-Term(iTRAQ8plex); S5(Phospho); S8(Phospho); K31(iTRAQ8plex)	0	T(2): 0.1; S(3): 2.5; S(5): 97.4; S(8): 50.0; S(9): 50.0; S(12): 0.0; S(13): 0.0; T(14): 0.0; T(17): 0.0; T(18): 0.0; T(20): 0.0; T(21): 0.0	239.28	23.23	4	1.44692	3924.9	4.30833	1.06727	1.0956	1.07408	1.07898	0.99114	0.84285	0.941737	0.925242	1.16616	0.0257984
tLDsGEGEFsDDVPLGVWk	5	XP_023760794.1	sister chromatid cohesion protein PDS5 homolog B-like isoform X2 [Lactuca sativa]		sister chromatid cohesion protein PDS5 homolog B-like isoform X2 [Lactuca sativa]	N-Term(iTRAQ8plex); S4(Phospho); S10(Phospho); K19(iTRAQ8plex)	0	T(1): 0.1; S(4): 99.9; S(10): 100.0	271.529	34.69	3	0.0528457	2819.3	-1.78095	0.968027	1.01186	0.930811	0.970234	1.09016	1.05035	1.04999	1.0635	0.912303	0.0258046
fVDLQPPEEQFFtPFSsPR	12	XP_023759429.1	ankyrin repeat domain-containing protein 13C-like [Lactuca sativa]		ankyrin repeat domain-containing protein 13C-like [Lactuca sativa]	N-Term(iTRAQ8plex); T13(Phospho); S17(Phospho)	0	T(13): 99.8; S(16): 4.3; S(17): 95.9	166.919	15.94	3	3.66107	2732.23	-1.72729	0.823456	0.987267	0.916034	0.908919	1.04703	1.10961	1.10345	1.08669	0.836407	0.0259014
dGsINLGNTE	6	PLY73012.1	hypothetical protein LSAT_9X34801 [Lactuca sativa]		hypothetical protein LSAT_9X34801 [Lactuca sativa]	N-Term(iTRAQ8plex); S3(Phospho)	0	S(3): 100.0; T(9): 0.0	140.082	30.74	2	0.0259747	1403.63	-2.56807	0.993566	0.967704	0.964543	0.975271	1.005	1.02731	1.0439	1.0254	0.951111	0.0261207
sAsPPPAIGLQNPYNLR	24	PLY85691.1	hypothetical protein LSAT_7X92681 [Lactuca sativa]		hypothetical protein LSAT_7X92681 [Lactuca sativa]	N-Term(iTRAQ8plex); S1(Phospho); S3(Phospho)	0	S(1): 100.0; S(3): 100.0; Y(14): 0.0	525.382	73.89	3	5.20607e-06	2259.09	-0.459562	1.04077	1.00948	1.02111	1.02379	0.996704	0.980579	0.968987	0.98209	1.04246	0.0265807
dGGDDsGsDVGGGNNDsDDNLHSPLISR	10	XP_023762187.1	monosaccharide-sensing protein 2-like [Lactuca sativa]		monosaccharide-sensing protein 2-like [Lactuca sativa]	N-Term(iTRAQ8plex); S6(Phospho); S8(Phospho); S17(Phospho)	0	S(6): 100.0; S(8): 100.0; S(17): 100.0; S(23): 0.0; S(27): 0.0	279.406	57.09	3	7.89553e-05	3316.25	-2.45908	1.00474	0.923875	0.882517	0.937045	1.03875	1.09499	1.08868	1.07414	0.87237	0.0267236
cEVIGssDEEQENsGGETELPEIDPR	3	XP_023731900.1	homeotic protein knotted-1 isoform X1 [Lactuca sativa]		homeotic protein knotted-1 isoform X1 [Lactuca sativa]	N-Term(iTRAQ8plex); C1(Carbamidomethyl); S6(Phospho); S7(Phospho); S14(Phospho)	0	S(6): 100.0; S(7): 100.0; S(14): 97.1; T(18): 2.9	194.168	52.15	3	0.000375475	3420.34	-0.510248	1.10406	1.02114	1.18426	1.10315	0.899023	0.92754	0.963858	0.930141	1.18601	0.0269525
vAGNTTTAsPAAtPR	10	PLY74682.1	hypothetical protein LSAT_5X79561 [Lactuca sativa]		hypothetical protein LSAT_5X79561 [Lactuca sativa]	N-Term(iTRAQ8plex); S9(Phospho); T13(Phospho)	0	T(5): 0.0; T(6): 0.0; T(7): 0.0; S(9): 100.0; T(13): 100.0	300.15	33.84	3	0.0309166	1878.87	-0.564507	1.14336	1.03865	1.08443	1.08881	0.994806	0.878175	0.85408	0.90902	1.19778	0.0274382
gEIIYFRDsDDEMPDsDEDPDDDLDI	3	AIU49327.1	AT2G18410-like protein, partial [Lactuca sativa]		AT2G18410-like protein, partial [Lactuca sativa]	N-Term(iTRAQ8plex); S9(Phospho); S16(Phospho)	1	Y(5): 3.8; S(9): 96.2; S(16): 100.0	203.509	18.28	3	0.809835	3495.35	0.27414	0.968302	0.9013	0.909459	0.926354	0.994216	1.07842	1.03156	1.03473	0.89526	0.0282357
eDGGGAGGDGGsTsSIGNDVAAQDANYIAR	12	XP_023738173.1	SNF1-related protein kinase regulatory subunit beta-2 [Lactuca sativa]		SNF1-related protein kinase regulatory subunit beta-2 [Lactuca sativa]	N-Term(iTRAQ8plex); S12(Phospho); S14(Phospho)	0	S(12): 97.2; T(13): 4.1; S(14): 49.3; S(15): 49.3; Y(27): 0.0	316.784	76.07	3	2.26657e-06	3246.35	-1.86623	0.874269	0.980894	0.903073	0.919412	1.09376	1.01947	1.03752	1.05025	0.875423	0.0282563
hEDWDEEsVGGR	14	XP_023740321.1	monosaccharide-sensing protein 2-like [Lactuca sativa]		monosaccharide-sensing protein 2-like [Lactuca sativa]	N-Term(iTRAQ8plex); S8(Phospho)	0	S(8): 100.0	190.292	19.16	3	0.407699	1799.75	-0.763811	0.988729	0.956942	0.880683	0.942118	1.03199	1.06783	1.09306	1.06429	0.885207	0.0289599
eSGVYAQPLPsPSASDR	1	PLY91594.1	hypothetical protein LSAT_7X10221 [Lactuca sativa]		hypothetical protein LSAT_7X10221 [Lactuca sativa]	N-Term(iTRAQ8plex); S11(Phospho)	0	S(2): 0.0; Y(5): 0.0; S(11): 33.3; S(13): 33.3; S(15): 33.3	200.058	30.89	2	0.0907173	2145.02	1.44087	1.00047	0.936233	0.883551	0.940086	1.08489	1.03216	1.08245	1.0665	0.881467	0.0290159
dIVEsEEEsADEFVEPR	25	XP_023738355.1	sister-chromatid cohesion protein 3 [Lactuca sativa]		sister-chromatid cohesion protein 3 [Lactuca sativa]	N-Term(iTRAQ8plex); S5(Phospho); S9(Phospho)	0	S(5): 100.0; S(9): 100.0	493.87	61.05	2	4.60541e-05	2444.01	-0.279254	1.0583	1.04403	1.00525	1.03586	0.990725	0.937759	0.958365	0.962283	1.07646	0.0291732
sAETTYTPPPPPPR	5	XP_023772378.1	phototropin-1 isoform X2 [Lactuca sativa]		phototropin-1 isoform X2 [Lactuca sativa]	N-Term(iTRAQ8plex); S1(Phospho)	0	S(1): 100.0; T(4): 0.0; T(5): 0.0; Y(6): 0.0; T(7): 0.0	216.238	29.58	2	0.114175	1894.93	0.171235	1.09431	1.01929	1.04254	1.05204	0.990731	0.953968	0.966079	0.970259	1.08429	0.0295096
vAtVPGVLSELDDEGFSSDAPSsVsQDR	5	XP_023736195.1	alpha,alpha-trehalose-phosphate synthase [UDP-forming] 5 [Lactuca sativa]		alpha,alpha-trehalose-phosphate synthase [UDP-forming] 5 [Lactuca sativa]	N-Term(iTRAQ8plex); T3(Phospho); S23(Phospho); S25(Phospho)	0	T(3): 100.0; S(9): 0.0; S(17): 0.0; S(18): 0.0; S(22): 100.0; S(23): 100.0; S(25): 0.0	268.282	38.45	3	0.0164609	3408.44	-3.07628	0.950586	0.992203	1.00776	0.983515	1.02877	1.06129	1.06521	1.05176	0.935116	0.0296013
yPDMESPWsPAYYsPR	10	PLY75489.1	hypothetical protein LSAT_7X54081 [Lactuca sativa]		hypothetical protein LSAT_7X54081 [Lactuca sativa]	N-Term(iTRAQ8plex); S9(Phospho); S14(Phospho)	0	Y(1): 0.0; S(6): 0.0; S(9): 100.0; Y(12): 0.0; Y(13): 0.0; S(14): 100.0	334.955	43.43	2	0.00207451	2409.98	0.774352	0.984306	0.926569	0.934097	0.948324	1.15687	1.09801	1.02065	1.09184	0.868553	0.0297554
dSSPDsGsEEFTRPk	1	XP_023752796.1	uncharacterized protein LOC111901150 [Lactuca sativa]		uncharacterized protein LOC111901150 [Lactuca sativa]	N-Term(iTRAQ8plex); S6(Phospho); S8(Phospho); K15(iTRAQ8plex)	0	S(2): 0.0; S(3): 2.5; S(6): 97.5; S(8): 99.9; T(12): 0.0	159.058	3.93	3	38.6572	2407.07	-0.981513	0.968317	0.911726	0.902978	0.927674	1.14927	1.00555	1.08727	1.0807	0.858403	0.0299617
gAsPsPSPLGSGR	1	XP_023740193.1	protein IQ-DOMAIN 1-like [Lactuca sativa]		protein IQ-DOMAIN 1-like [Lactuca sativa]	N-Term(iTRAQ8plex); S3(Phospho); S5(Phospho)	0	S(3): 99.8; S(5): 4.0; S(7): 96.2; S(11): 0.0	91.2362	9.52	2	4.95887	1633.73	0.0233852	1.05939	1.03081	1.16987	1.08669	0.923091	0.967009	0.873225	0.921108	1.17976	0.0301949
fYmEPDTsDsGSMTSGR	4	XP_023772276.1	protein argonaute 1-like [Lactuca sativa]		protein argonaute 1-like [Lactuca sativa]	N-Term(iTRAQ8plex); M3(Oxidation); S8(Phospho); S10(Phospho)	0	Y(2): 0.0; T(7): 50.0; S(8): 50.0; S(10): 49.9; S(12): 49.9; T(14): 0.1; S(15): 0.0	99.2719	14.68	2	0.714857	2347.88	-0.273451	1.08203	1.02021	1.09428	1.06551	0.971905	0.986104	0.90481	0.954273	1.11656	0.0306587
sAGsSPNLPEIR	18	XP_023759453.1	calcium permeable stress-gated cation channel 1-like [Lactuca sativa]		calcium permeable stress-gated cation channel 1-like [Lactuca sativa]	N-Term(iTRAQ8plex); S1(Phospho); S4(Phospho)	0	S(1): 100.0; S(4): 99.9; S(5): 0.1	239.828	29.03	2	0.0694519	1691.77	-1.84748	1.05783	1.03533	1.0632	1.05212	1.01393	0.934148	0.931187	0.959754	1.09624	0.0313474
vEMSPIGEDYEESRNSMsPsVATTED	6	XP_023758076.1	leucine-rich repeat receptor-like protein kinase PXC1 [Lactuca sativa]		leucine-rich repeat receptor-like protein kinase PXC1 [Lactuca sativa]	N-Term(iTRAQ8plex); S18(Phospho); S20(Phospho)	1	S(4): 0.0; Y(10): 49.4; S(13): 49.4; S(16): 3.8; S(18): 97.3; S(20): 0.1; T(23): 0.0; T(24): 0.0	107.884	17.19	3	1.71982	3324.36	1.16734	0.93699	0.968817	0.941387	0.949065	1.05693	1.00535	1.11974	1.06068	0.894774	0.0319319
tSsFGsAsSSPSLASLPPIR	61	XP_023759138.1	mediator of RNA polymerase II transcription subunit 15 [Lactuca sativa]		mediator of RNA polymerase II transcription subunit 15 [Lactuca sativa]	N-Term(iTRAQ8plex); S3(Phospho); S6(Phospho); S8(Phospho)	0	T(1): 0.1; S(2): 0.1; S(3): 99.7; S(6): 100.0; S(8): 1.8; S(9): 49.1; S(10): 49.1; S(12): 0.1; S(15): 0.0	292.723	68.47	2	1.31423e-05	2493.11	1.26098	1.02733	1.00723	1.02479	1.01978	0.9949	0.993103	0.968233	0.985412	1.03488	0.0323033
aLHSAFFENDMsDID	2	XP_023768428.1	aspartokinase 2, chloroplastic-like isoform X2 [Lactuca sativa]		aspartokinase 2, chloroplastic-like isoform X2 [Lactuca sativa]	N-Term(iTRAQ8plex); S12(Phospho)	0	S(4): 0.0; S(12): 100.0	254.608	51.1	2	0.000495246	2095.91	5.30236	1.02738	1.10723	1.09611	1.07691	0.859788	0.900327	1.0011	0.920406	1.17003	0.0328312
vAtVPGVLSELDDEGFSSDAPSSVsQDR	5	XP_023736195.1	alpha,alpha-trehalose-phosphate synthase [UDP-forming] 5 [Lactuca sativa]		alpha,alpha-trehalose-phosphate synthase [UDP-forming] 5 [Lactuca sativa]	N-Term(iTRAQ8plex); T3(Phospho); S25(Phospho)	0	T(3): 100.0; S(9): 0.0; S(17): 0.0; S(18): 0.0; S(22): 49.9; S(23): 49.9; S(25): 0.1	225.389	40.74	3	0.0150156	3328.49	2.83448	0.928843	0.976388	0.9378	0.947677	0.997486	1.09399	1.05413	1.04854	0.903809	0.0330676
sVVsVQsEk	3	XP_023744893.1	protein IQ-DOMAIN 1-like [Lactuca sativa]		protein IQ-DOMAIN 1-like [Lactuca sativa]	N-Term(iTRAQ8plex); S4(Phospho); S7(Phospho); K9(iTRAQ8plex)	0	S(1): 0.0; S(4): 100.0; S(7): 100.0	195.587	21.7	2	0.686562	1730.86	0.474544	0.976522	0.970077	0.929621	0.95874	1.07996	1.02862	1.01085	1.03981	0.922032	0.0331274
gWsEsEEDEPEkR	1	XP_023744283.1	protein CTR9 homolog [Lactuca sativa]		protein CTR9 homolog [Lactuca sativa]	N-Term(iTRAQ8plex); S3(Phospho); S5(Phospho); K12(iTRAQ8plex)	1	S(3): 100.0; S(5): 100.0	171.785	5.53	3	18.9211	2346.01	-0.345719	0.943217	0.990373	0.921414	0.951668	1.01999	1.10462	1.04133	1.05531	0.901786	0.0334163
sLSMPPTPTTPGTPTTPSPtAAR	25	XP_023736750.1	dormancy-associated protein 1-like [Lactuca sativa]		dormancy-associated protein 1-like [Lactuca sativa]	N-Term(iTRAQ8plex); S1(Phospho); T20(Phospho)	0	S(1): 0.2; S(3): 99.8; T(7): 0.0; T(9): 0.0; T(10): 0.0; T(13): 0.0; T(15): 0.0; T(16): 0.0; S(18): 96.3; T(20): 3.7	284.047	34.4	3	0.0579654	2730.27	-0.819768	0.935412	0.917837	1.00631	0.953188	1.0651	1.08427	1.02168	1.05701	0.901773	0.0339262
mVNTTEIsPAssSGk	1	PLY62817.1	hypothetical protein LSAT_4X20360 [Lactuca sativa]		hypothetical protein LSAT_4X20360 [Lactuca sativa]	N-Term(iTRAQ8plex); S8(Phospho); S11(Phospho); S12(Phospho); K15(iTRAQ8plex)	0	T(4): 0.0; T(5): 0.2; S(8): 99.8; S(11): 96.0; S(12): 96.0; S(13): 8.0	175.609	19.23	3	0.937878	2357.03	-2.78031	0.983416	0.836174	0.958405	0.925999	1.12746	1.07336	1.05543	1.08541	0.853129	0.0340395
iMGGssGSLGGGALTSQNR	2	XP_023747178.1	probable protein S-acyltransferase 7 [Lactuca sativa]		probable protein S-acyltransferase 7 [Lactuca sativa]	N-Term(iTRAQ8plex); S5(Phospho); S6(Phospho)	0	S(5): 97.5; S(6): 51.3; S(8): 51.3; T(15): 0.0; S(16): 0.0	103.42	9.96	2	8.77041	2213.99	-1.31232	0.955345	0.899656	0.971994	0.942332	1.13007	1.06086	1.015	1.06864	0.881802	0.034156
gtkTDEENEEEDEDDNQmIDAPVMVEASk	6	XP_023735176.1	titin isoform X2 [Lactuca sativa]		titin isoform X2 [Lactuca sativa]	N-Term(iTRAQ8plex); T2(Phospho); K3(iTRAQ8plex); M18(Oxidation); K29(iTRAQ8plex)	1	T(2): 94.2; T(4): 5.8; S(28): 0.0	119.664	35.37	4	0.0733847	4276.92	-4.95432	1.0132	1.16352	1.05202	1.07625	0.910502	0.958325	0.90456	0.924462	1.16419	0.0344605
kVDDsDsDsDEMDEEDsDDENEk	2	XP_023746397.1	replication stress response regulator SDE2 [Lactuca sativa]		replication stress response regulator SDE2 [Lactuca sativa]	K1(iTRAQ8plex); N-Term(iTRAQ8plex); S5(Phospho); S7(Phospho); S9(Phospho); S17(Phospho); K23(iTRAQ8plex)	1	S(5): 100.0; S(7): 100.0; S(9): 100.0; S(17): 100.0	109.908	24.16	3	0.14907	3880.43	1.18263	0.852015	1.00689	0.878112	0.912339	1.07973	1.14225	1.04099	1.08765	0.838814	0.0356032
vNYVAPPQPPsPVR	3	XP_023733552.1	vesicle-associated protein 1-1-like [Lactuca sativa]		vesicle-associated protein 1-1-like [Lactuca sativa]	N-Term(iTRAQ8plex); S11(Phospho)	0	Y(3): 0.0; S(11): 100.0	186.649	33.45	2	0.0539742	1904.99	-1.94461	0.968943	0.984328	0.955399	0.969557	1.00371	0.991893	0.997493	0.9977	0.971792	0.0356116
sIsITPEIGDDIVR	1	XP_023741217.1	serine/threonine-protein kinase EDR1-like isoform X2 [Lactuca sativa]		serine/threonine-protein kinase EDR1-like isoform X2 [Lactuca sativa]	N-Term(iTRAQ8plex); S1(Phospho); S3(Phospho)	0	S(1): 100.0; S(3): 100.0; T(5): 0.0	142.195	15.67	2	2.40665	1978.94	-1.5542	1.05055	1.04883	1.13888	1.07942	0.887182	1.0049	0.889825	0.927303	1.16404	0.0358203
lILFGGATALEGNSANAGtPTsAGGAGIR	2	PLY88840.1	hypothetical protein LSAT_3X115781 [Lactuca sativa]		hypothetical protein LSAT_3X115781 [Lactuca sativa]	N-Term(iTRAQ8plex); T19(Phospho); S22(Phospho)	0	T(8): 7.4; S(14): 7.4; T(19): 85.1; T(21): 8.1; S(22): 91.9	120.08	19.36	3	2.61073	3108.52	2.61817	0.946387	0.875091	1.00591	0.942462	1.07496	1.09225	1.03956	1.06892	0.881692	0.0364221
dNsVELsETEDSIGR	3	XP_023738585.1	transcription factor TCP14-like [Lactuca sativa]		transcription factor TCP14-like [Lactuca sativa]	N-Term(iTRAQ8plex); S3(Phospho); S7(Phospho)	0	S(3): 100.0; S(7): 49.1; T(9): 49.1; S(12): 1.7	141.569	18.7	2	0.799935	2114.89	1.23913	1.09352	1.07517	1.03029	1.06633	0.925356	0.875102	1.00612	0.935527	1.13981	0.0371033
dGsLNVDNEGT	1	XP_023770690.1	calcium-dependent protein kinase 8-like [Lactuca sativa]		calcium-dependent protein kinase 8-like [Lactuca sativa]	N-Term(iTRAQ8plex); S3(Phospho)	0	S(3): 100.0; T(11): 0.0	179.788	34.08	2	0.00926293	1504.64	-4.14559	1.1922	1.02233	1.0572	1.09058	0.929501	0.94781	0.864979	0.914097	1.19306	0.037459
yLDELSSYkPQPTNsPNNsE	6	XP_023738794.1	FACT complex subunit SSRP1-like isoform X2 [Lactuca sativa]		FACT complex subunit SSRP1-like isoform X2 [Lactuca sativa]	N-Term(iTRAQ8plex); K9(iTRAQ8plex); S15(Phospho); S19(Phospho)	0	Y(1): 0.0; S(6): 0.0; S(7): 0.0; Y(8): 0.0; T(13): 0.0; S(15): 100.0; S(19): 100.0	338.643	30.85	3	0.132874	3051.38	-1.29578	0.981876	0.938866	0.88842	0.936387	1.18334	1.01502	1.1252	1.10785	0.845227	0.038119
sLADAsVtDEPEVQsEEEk	2	XP_023747405.1	stress-related protein-like [Lactuca sativa]		stress-related protein-like [Lactuca sativa]	N-Term(Acetyl); S1(Phospho); S6(Phospho); T8(Phospho); S15(Phospho); K19(iTRAQ8plex)	0	S(1): 100.0; S(6): 100.0; T(8): 100.0; S(15): 100.0	313.891	70.63	2	2.16242e-06	2729.01	-1.14549	1.10074	0.986584	1.11337	1.0669	0.960668	0.914804	0.939364	0.938279	1.13708	0.0387672
eAEPVVDtPPPAtPEVVAEEPk	8	XP_023742797.1	major latex allergen Hev b 5-like [Lactuca sativa]		major latex allergen Hev b 5-like [Lactuca sativa]	N-Term(iTRAQ8plex); T8(Phospho); T13(Phospho); K22(iTRAQ8plex)	0	T(8): 100.0; T(13): 100.0	472.64	66.91	3	4.56603e-05	3069.49	0.150566	0.913855	0.936446	0.94071	0.930337	1.14363	0.983524	1.11725	1.08147	0.860253	0.0396599
eREEGVTAEssEDGNESk	9	XP_023768171.1	protein EMBRYO DEFECTIVE 514 [Lactuca sativa]		protein EMBRYO DEFECTIVE 514 [Lactuca sativa]	N-Term(iTRAQ8plex); S10(Phospho); S11(Phospho); K18(iTRAQ8plex)	1	T(7): 0.0; S(10): 100.0; S(11): 100.0; S(17): 0.0	251.667	35.97	3	0.0257356	2721.18	3.02015	0.983843	0.918114	1.00513	0.969029	1.07259	1.06834	1.0303	1.05708	0.916707	0.0403031
asLEGsTPVPVYk	1	PLY84008.1	hypothetical protein LSAT_8X29340 [Lactuca sativa]		hypothetical protein LSAT_8X29340 [Lactuca sativa]	N-Term(iTRAQ8plex); S2(Phospho); S6(Phospho); K13(iTRAQ8plex)	0	S(2): 0.6; S(6): 99.7; T(7): 99.7; Y(12): 0.0	61.482	9.1	3	16.381	2116.06	-1.04842	0.981325	0.936123	0.976869	0.964772	1.08604	1.03816	1.00904	1.04441	0.923745	0.0404426
hYADDItDDDDsDYEER	1	XP_023767941.1	protein GRAVITROPIC IN THE LIGHT 1-like [Lactuca sativa]		protein GRAVITROPIC IN THE LIGHT 1-like [Lactuca sativa]	N-Term(iTRAQ8plex); T7(Phospho); S12(Phospho)	0	Y(2): 0.0; T(7): 100.0; S(12): 99.9; Y(14): 0.1	209.181	36.63	2	0.0043454	2537.92	2.40517	0.907471	0.976892	0.998079	0.960814	1.03388	1.04246	1.0657	1.04735	0.917379	0.0404461
sVAADSWsIksDYGsTLDDDQR	3	XP_023761541.1	EEF1A lysine methyltransferase 2 [Lactuca sativa]		EEF1A lysine methyltransferase 2 [Lactuca sativa]	N-Term(iTRAQ8plex); S8(Phospho); K10(iTRAQ8plex); S11(Phospho); S15(Phospho)	1	S(1): 0.0; S(6): 5.5; S(8): 94.5; S(11): 99.0; Y(13): 89.3; S(15): 5.8; T(16): 5.8	135.329	15.56	3	3.66227	3264.39	-1.5212	0.986761	0.983259	0.874688	0.948236	1.07226	1.06875	1.04305	1.06135	0.893423	0.0406247
tGDDGEFmGHsPPPsPR	7	XP_023738173.1	SNF1-related protein kinase regulatory subunit beta-2 [Lactuca sativa]		SNF1-related protein kinase regulatory subunit beta-2 [Lactuca sativa]	N-Term(iTRAQ8plex); M8(Oxidation); S11(Phospho); S15(Phospho)	0	T(1): 0.0; S(11): 100.0; S(15): 100.0	249.295	30.62	3	0.0280029	2263.89	-4.00902	1.06702	1.10616	1.08201	1.08506	1.02364	0.91912	0.850237	0.930998	1.16548	0.0406939
eGDDYQSDVPGNDDNDDNLQsPLISR	6	XP_023740321.1	monosaccharide-sensing protein 2-like [Lactuca sativa]		monosaccharide-sensing protein 2-like [Lactuca sativa]	N-Term(iTRAQ8plex); S21(Phospho)	0	Y(5): 0.0; S(7): 0.0; S(21): 100.0; S(25): 0.0	290.576	61.24	3	0.000101695	3262.4	0.662208	1.0005	0.971759	0.960653	0.977638	1.03342	1.00646	1.01963	1.01984	0.958622	0.041034
vVTLHENDDDGsssD	6	XP_023740761.1	phosducin-like protein 3 [Lactuca sativa]		phosducin-like protein 3 [Lactuca sativa]	N-Term(iTRAQ8plex); S12(Phospho); S13(Phospho); S14(Phospho)	0	T(3): 0.0; S(12): 100.0; S(13): 100.0; S(14): 100.0	371.57	65.8	2	3.82704e-06	2133.76	-1.39113	1.05955	1.01354	1.00802	1.02704	0.964878	0.967028	0.988672	0.973526	1.05497	0.0411339
sPFGFDDSVPGsPASR	6	XP_023754119.1	epidermal growth factor receptor substrate 15-like 1 [Lactuca sativa]		epidermal growth factor receptor substrate 15-like 1 [Lactuca sativa]	N-Term(iTRAQ8plex); S12(Phospho)	0	S(1): 0.0; S(8): 0.0; S(12): 98.1; S(15): 1.9	258.41	31.9	2	0.0524917	2006.92	2.37469	1.00614	1.01741	1.01068	1.01141	1.0002	0.978382	0.969597	0.982727	1.02919	0.0412798
aAsPNsPPPPYR	15	XP_023749844.1	serrate RNA effector molecule [Lactuca sativa]		serrate RNA effector molecule [Lactuca sativa]	N-Term(iTRAQ8plex); S3(Phospho); S6(Phospho)	0	S(3): 100.0; S(6): 100.0; Y(11): 0.0	277.105	32.99	2	0.0239617	1717.76	-0.9686	1.02041	1.00019	1.04471	1.02177	0.980211	0.989874	0.973112	0.981066	1.04149	0.0415882
iDFEsDEEsPLTLSQSAGAk	3	PLY84285.1	hypothetical protein LSAT_1X39720 [Lactuca sativa]		hypothetical protein LSAT_1X39720 [Lactuca sativa]	N-Term(iTRAQ8plex); S5(Phospho); S9(Phospho); K20(iTRAQ8plex)	0	S(5): 100.0; S(9): 100.0; T(12): 0.0; S(14): 0.0; S(16): 0.0	241.215	35.97	3	0.04554	2892.34	-1.23796	1.0486	1.02992	1.12535	1.06795	0.997743	0.887236	0.934559	0.939846	1.13631	0.041685
lYsEsDDGENDWGGGAGSTVk	2	XP_023729119.1	DEAD-box ATP-dependent RNA helicase 31-like [Lactuca sativa]		DEAD-box ATP-dependent RNA helicase 31-like [Lactuca sativa]	N-Term(iTRAQ8plex); S3(Phospho); S5(Phospho); K21(iTRAQ8plex)	0	Y(2): 2.9; S(3): 97.1; S(5): 100.0; S(18): 0.0; T(19): 0.0	266.971	54.85	3	0.000301644	2912.23	-5.10487	0.904079	0.972533	0.916308	0.930973	1.15296	1.07311	0.999922	1.07533	0.865755	0.0420366
lPLPPTsPtSPPAPSSLPGTR	15	XP_023732191.1	mitogen-activated protein kinase kinase kinase 3-like [Lactuca sativa]		mitogen-activated protein kinase kinase kinase 3-like [Lactuca sativa]	N-Term(iTRAQ8plex); S7(Phospho); T9(Phospho)	0	T(6): 50.0; S(7): 50.0; T(9): 50.0; S(10): 50.0; S(15): 0.0; S(16): 0.0; T(20): 0.0	90.3568	10.19	3	16.2292	2534.26	1.38827	1.10921	1.02615	1.02182	1.05239	0.951991	0.982439	0.909683	0.948038	1.11007	0.0420828
fYMEPDtSDSGSMISGAAGGR	2	XP_023739101.1	protein argonaute 1-like [Lactuca sativa]		protein argonaute 1-like [Lactuca sativa]	N-Term(iTRAQ8plex); T7(Phospho)	0	Y(2): 0.0; T(7): 48.9; S(8): 48.9; S(10): 2.1; S(12): 0.1; S(15): 0.0	131.15	16.43	2	1.90426	2520.07	-0.0376718	1.01325	0.932609	0.936657	0.960838	1.05478	1.06517	1.0214	1.04712	0.917602	0.0424701
eGDDYQsDVPGNDDNDDNLQsPLIsR	5	XP_023740321.1	monosaccharide-sensing protein 2-like [Lactuca sativa]		monosaccharide-sensing protein 2-like [Lactuca sativa]	N-Term(iTRAQ8plex); S7(Phospho); S21(Phospho); S25(Phospho)	0	Y(5): 0.1; S(7): 99.9; S(21): 100.0; S(25): 100.0	389.918	54.6	3	0.000199894	3422.33	1.50989	0.915146	0.971686	0.88012	0.922317	1.12874	0.987545	1.08993	1.06874	0.862996	0.0425097
msSGsIADSVTR	2	XP_023740367.1	serine/threonine-protein kinase PAK 1 isoform X1 [Lactuca sativa]		serine/threonine-protein kinase PAK 1 isoform X1 [Lactuca sativa]	N-Term(iTRAQ8plex); S2(Phospho); S5(Phospho)	0	S(2): 99.9; S(3): 0.1; S(5): 100.0; S(9): 0.0; T(11): 0.0	212.17	19.8	2	0.370684	1674.71	-0.414646	0.936778	0.96793	0.973627	0.959445	1.10523	1.03027	1.01235	1.04928	0.914382	0.04284
rDSGNSLQsSsDISDDEGLGk	5	XP_023772378.1	phototropin-1 isoform X2 [Lactuca sativa]		phototropin-1 isoform X2 [Lactuca sativa]	N-Term(iTRAQ8plex); S9(Phospho); S11(Phospho); K21(iTRAQ8plex)	1	S(3): 98.6; S(6): 5.2; S(9): 5.2; S(10): 5.2; S(11): 5.2; S(14): 80.7	92.9986	9.4	3	15.879	2935.32	0.791516	1.0185	1.01955	1.09442	1.04416	0.944041	0.951101	0.987512	0.960885	1.08666	0.0432246
vVVIEssGDES	4	PLY99096.1	hypothetical protein LSAT_5X59341 [Lactuca sativa]		hypothetical protein LSAT_5X59341 [Lactuca sativa]	N-Term(iTRAQ8plex); S6(Phospho); S7(Phospho)	0	S(6): 99.9; S(7): 99.9; S(11): 0.2	166.039	65.17	2	8.37764e-06	1584.67	-1.41877	1.08527	1.00366	1.12607	1.07167	0.96834	0.871327	0.960162	0.933276	1.14828	0.043633
fEESsERsDEESPGk	5	XP_023756012.1	C2 domain-containing protein At1g53590-like [Lactuca sativa]		C2 domain-containing protein At1g53590-like [Lactuca sativa]	N-Term(iTRAQ8plex); S5(Phospho); S8(Phospho); K15(iTRAQ8plex)	1	S(4): 50.0; S(5): 50.0; S(8): 4.0; S(12): 96.0	117.327	9.59	3	9.02284	2481.06	-1.60547	0.982981	0.968943	0.866885	0.939603	1.07012	1.02338	1.10285	1.06545	0.881885	0.0436793
tAEVPEGsQQsEMk	8	PLY62833.1	hypothetical protein LSAT_4X19300 [Lactuca sativa]		hypothetical protein LSAT_4X19300 [Lactuca sativa]	N-Term(iTRAQ8plex); S8(Phospho); S11(Phospho); K14(iTRAQ8plex)	0	T(1): 0.0; S(8): 100.0; S(11): 100.0	233.075	32.51	3	0.0515603	2289.03	-0.665319	1.01711	0.963529	0.949411	0.976682	1.06318	1.03275	1.03386	1.04326	0.936181	0.0437919
gLVSYGDGsPDsQk	16	XP_023763432.1	peptidyl-prolyl cis-trans isomerase CYP95 isoform X2 [Lactuca sativa]		peptidyl-prolyl cis-trans isomerase CYP95 isoform X2 [Lactuca sativa]	N-Term(iTRAQ8plex); S9(Phospho); S12(Phospho); K14(iTRAQ8plex)	0	S(4): 0.0; Y(5): 0.0; S(9): 100.0; S(12): 100.0	397.552	53.52	2	0.00040417	2178	-0.740107	0.975952	0.999788	0.960388	0.978709	1.03554	1.00274	1.03055	1.02295	0.956755	0.0448553
eGEAETVAPtPtPk	1	XP_023739259.1	DUF724 domain-containing protein 7-like isoform X5 [Lactuca sativa]		DUF724 domain-containing protein 7-like isoform X5 [Lactuca sativa]	N-Term(iTRAQ8plex); T10(Phospho); T12(Phospho); K14(iTRAQ8plex)	0	T(6): 0.2; T(10): 99.8; T(12): 100.0	130.17	15.73	3	3.22365	2195.04	-4.1712	0.939272	0.945847	0.921858	0.935659	1.01439	1.03438	1.16166	1.07015	0.874329	0.0449439
qNSGPLPPVLPATGLItsGPIsSGPLTSSGAPR	6	XP_023758967.1	uncharacterized membrane protein At1g16860-like [Lactuca sativa]		uncharacterized membrane protein At1g16860-like [Lactuca sativa]	N-Term(iTRAQ8plex); T17(Phospho); S18(Phospho); S22(Phospho)	0	S(3): 100.0; T(13): 0.0; T(17): 4.8; S(18): 90.6; S(22): 9.4; S(23): 95.2; T(27): 0.0; S(28): 0.0; S(29): 0.0	201.19	50.31	3	0.00268206	3670.79	1.77457	1.10579	1.08639	0.993009	1.06173	0.924345	0.985703	0.930399	0.946816	1.12137	0.045054
vAtEFEYDGEGsPTAR	1	XP_023765836.1	uncharacterized protein LOC111914294 isoform X1 [Lactuca sativa]		uncharacterized protein LOC111914294 isoform X1 [Lactuca sativa]	N-Term(iTRAQ8plex); T3(Phospho); S12(Phospho)	0	T(3): 99.8; Y(7): 0.2; S(12): 96.0; T(14): 4.0	113.529	13.19	2	2.56657	2192.91	1.11057	1.11504	1.0398	1.02263	1.05916	0.953551	0.988826	0.895362	0.945913	1.11972	0.045087
sssPSPDDR	1	XP_023740171.1	serine/arginine-rich splicing factor RS2Z33-like isoform X2 [Lactuca sativa]		serine/arginine-rich splicing factor RS2Z33-like isoform X2 [Lactuca sativa]	N-Term(iTRAQ8plex); S2(Phospho); S3(Phospho)	0	S(1): 50.7; S(2): 50.7; S(3): 98.6; S(5): 0.1	142.711	12.24	2	0.653754	1411.55	1.33968	1.11383	1.00581	1.09894	1.07286	0.883736	1.00058	0.914802	0.933039	1.14986	0.045182
mDTMFTQGQTQTGSSPEVQIsGQtSPQTR	3	XP_023744607.1	zinc finger CCCH domain-containing protein 32-like [Lactuca sativa]		zinc finger CCCH domain-containing protein 32-like [Lactuca sativa]	N-Term(iTRAQ8plex); S21(Phospho); T24(Phospho)	0	T(3): 0.0; T(6): 0.0; T(10): 0.0; T(12): 0.0; S(14): 0.0; S(15): 0.0; S(21): 100.0; T(24): 4.0; S(25): 96.0; T(28): 0.0	278.054	46.19	3	0.00414873	3592.56	0.0982424	0.913376	0.951927	0.872884	0.912729	0.998923	1.19305	1.07019	1.08739	0.839379	0.0460299
aSsIsSLLDGSVk	8	XP_023758431.1	uncharacterized protein LOC111906886 [Lactuca sativa]		uncharacterized protein LOC111906886 [Lactuca sativa]	N-Term(iTRAQ8plex); S3(Phospho); S5(Phospho); K13(iTRAQ8plex)	0	S(2): 96.6; S(3): 3.4; S(5): 50.0; S(6): 50.0; S(11): 0.0	134.792	19.64	2	1.39062	2032.02	-3.30639	0.910604	0.882521	0.960638	0.917921	1.04621	1.20853	1.02707	1.09394	0.839097	0.0467645
iISSVTAFVMLSPTTSNsFLmYAk	2	XP_023771546.1	RNA pseudouridine synthase 7 isoform X2 [Lactuca sativa]		RNA pseudouridine synthase 7 isoform X2 [Lactuca sativa]	N-Term(Acetyl); S18(Phospho); M21(Oxidation); K24(iTRAQ8plex)	0	S(3): 12.3; S(4): 12.3; T(6): 12.3; S(12): 12.3; T(14): 12.3; T(15): 12.3; S(16): 12.3; S(18): 12.3; Y(22): 1.7	25.5303	10.88	4	18.418	3050.51	-2.69343	1.07942	1.04467	1.0692	1.06443	0.893321	0.889499	1.02396	0.935592	1.13771	0.0469187
kEEsEEGsEGDAEEGsEQEEEDIMDE	3	XP_023744132.1	peter Pan-like protein [Lactuca sativa]		peter Pan-like protein [Lactuca sativa]	K1(iTRAQ8plex); N-Term(iTRAQ8plex); S4(Phospho); S8(Phospho); S16(Phospho)	1	S(4): 100.0; S(8): 100.0; S(16): 100.0	202.484	51.52	3	0.000281877	3764.4	0.490281	0.862109	0.91517	1.02471	0.933996	1.06707	1.07287	1.06994	1.06996	0.872925	0.0469438
vDsSGEMcGANFk	8	XP_023752517.1	stem-specific protein TSJT1 [Lactuca sativa]		stem-specific protein TSJT1 [Lactuca sativa]	N-Term(iTRAQ8plex); S3(Phospho); C8(Carbamidomethyl); K13(iTRAQ8plex)	0	S(3): 98.3; S(4): 1.7	276.125	54.23	3	0.000315839	2089.95	-2.54813	1.08642	1.08457	1.08679	1.08592	0.869846	0.848483	1.03642	0.918249	1.1826	0.047713
vGLGPAIQPQsPR	1	XP_023769051.1	dnaJ homolog subfamily C member 2 [Lactuca sativa]		dnaJ homolog subfamily C member 2 [Lactuca sativa]	N-Term(iTRAQ8plex); S11(Phospho)	0	S(11): 100.0	156.851	16.29	2	2.23803	1703.91	-2.39459	0.980471	0.958693	0.861683	0.933615	1.11865	1.09783	1.00673	1.0744	0.868961	0.0484194
lFLFPVTTQTPsItPAHsFGSTEGR	6	XP_023744825.1	uncharacterized protein LOC111892981 [Lactuca sativa]		uncharacterized protein LOC111892981 [Lactuca sativa]	N-Term(iTRAQ8plex); S12(Phospho); T14(Phospho); S18(Phospho)	0	T(7): 2.1; T(8): 48.9; T(10): 48.9; S(12): 0.2; T(14): 99.8; S(18): 99.6; S(21): 0.2; T(22): 0.2	171.327	20.56	3	1.802	3235.48	-1.05747	0.923383	1.00409	0.973357	0.966943	1.01792	1.05786	1.0906	1.05546	0.916136	0.0484872
gLDIETIQQAYtV	9	XP_023744185.1	plasma membrane ATPase 1 [Lactuca sativa]		plasma membrane ATPase 1 [Lactuca sativa]	N-Term(iTRAQ8plex); T12(Phospho)	0	T(6): 0.0; Y(11): 0.0; T(12): 100.0	270.721	55.51	2	0.00030481	1834.91	-0.350182	0.930615	0.926032	1.03114	0.962597	1.08649	1.0365	1.08188	1.06829	0.901062	0.0491014
tVQScsEIEQEEDTk	2	XP_023735176.1	titin isoform X2 [Lactuca sativa]		titin isoform X2 [Lactuca sativa]	N-Term(iTRAQ8plex); C5(Carbamidomethyl); S6(Phospho); K15(iTRAQ8plex)	0	T(1): 0.0; S(4): 4.0; S(6): 96.0; T(14): 0.0	112.2	13.94	3	4.77714	2471.14	-3.50345	1.0113	1.08044	1.10564	1.06579	0.867782	0.980473	0.968059	0.938771	1.13531	0.0491503
lAVDGTsHVssIVR	6	PLY82444.1	hypothetical protein LSAT_2X109721 [Lactuca sativa]		hypothetical protein LSAT_2X109721 [Lactuca sativa]	N-Term(iTRAQ8plex); S7(Phospho); S10(Phospho); S11(Phospho)	0	T(6): 50.9; S(7): 50.9; S(10): 98.3; S(11): 99.9	170.553	43.42	2	0.00298927	1984.88	-1.045	1.1285	1.0309	1.01831	1.05924	0.938083	0.934896	0.984929	0.952636	1.1119	0.0500036
sPMsEtYTDNLDAQSQPLTR	1	PLY72851.1	hypothetical protein LSAT_6X17640 [Lactuca sativa]		hypothetical protein LSAT_6X17640 [Lactuca sativa]	N-Term(iTRAQ8plex); S4(Phospho); T6(Phospho)	0	S(1): 93.1; S(4): 93.1; T(6): 13.5; Y(7): 0.2; T(8): 0.2; S(15): 0.0; T(19): 0.0	74.2733	8.54	3	11.1827	2718.15	-6.26183	0.863945	0.919923	0.995094	0.926321	0.999876	1.13224	1.11791	1.08334	0.855058	0.0500862
kEEEAEAsDDDmGFGLFD	79	XP_023734135.1	60S acidic ribosomal protein P0-like [Lactuca sativa]		60S acidic ribosomal protein P0-like [Lactuca sativa]	K1(iTRAQ8plex); N-Term(iTRAQ8plex); S8(Phospho); M12(Oxidation)	1	S(8): 100.0	399.482	39.44	2	0.0108302	2709.17	-0.257694	1.03045	1.05655	1.01241	1.03314	0.970552	0.933936	1.00127	0.968585	1.06664	0.0503179
sVDsDGDGYVNFEEFR	3	XP_023762839.1	calcium-binding allergen Ole e 8-like [Lactuca sativa]		calcium-binding allergen Ole e 8-like [Lactuca sativa]	N-Term(iTRAQ8plex); S4(Phospho)	0	S(1): 2.8; S(4): 97.2; Y(9): 0.0	118.458	14.81	2	1.83025	2219.93	-4.83049	1.09204	1.09267	1.01176	1.06549	0.992031	0.966131	0.88077	0.946311	1.12594	0.0503498
sVGSNYFDNPSTVGSPTVyDWLYSGETR	4	XP_023736750.1	dormancy-associated protein 1-like [Lactuca sativa]		dormancy-associated protein 1-like [Lactuca sativa]	N-Term(iTRAQ8plex); S1(Phospho); Y19(Phospho)	0	S(1): 99.7; S(4): 0.2; Y(6): 0.2; S(11): 0.1; T(12): 0.1; S(15): 92.7; T(17): 3.5; Y(19): 3.5; Y(23): 0.0; S(24): 0.0; T(27): 0.0	222.262	33.55	3	0.0624822	3562.53	-3.18368	0.964618	0.983946	0.934761	0.961109	1.02505	1.03268	1.12995	1.06256	0.904522	0.0505257
kPAEVHstDDDETLSk	1	XP_023768731.1	protein starmaker-like isoform X2 [Lactuca sativa]		protein starmaker-like isoform X2 [Lactuca sativa]	N-Term(iTRAQ8plex); K1(iTRAQ8plex); S7(Phospho); T8(Phospho); K16(iTRAQ8plex)	0	S(7): 100.0; T(8): 100.0; T(13): 0.0; S(15): 0.0	156.288	16.75	3	4.39817	2844.38	-0.0247634	1.00073	0.838798	0.820558	0.886696	1.09608	1.02618	1.2357	1.11932	0.792176	0.0505303
vSsTISESPIVNk	8	PLY99792.1	hypothetical protein LSAT_0X8120 [Lactuca sativa]		hypothetical protein LSAT_0X8120 [Lactuca sativa]	N-Term(iTRAQ8plex); S3(Phospho); K13(iTRAQ8plex)	0	S(2): 49.3; S(3): 49.3; T(4): 1.4; S(6): 0.0; S(8): 0.0	161.47	14.19	3	5.21108	2049.1	-2.69122	1.01791	0.908304	0.949341	0.958518	1.08987	1.05051	1.03389	1.05809	0.905895	0.0506364
lTGPSASSPVGSSFsAFQDDGGAVsPAAR	2	XP_023759437.1	protein MKS1 [Lactuca sativa]		protein MKS1 [Lactuca sativa]	N-Term(iTRAQ8plex); S15(Phospho); S25(Phospho)	0	T(2): 0.5; S(5): 6.4; S(7): 92.6; S(8): 0.5; S(12): 0.0; S(13): 0.0; S(15): 0.0; S(25): 100.0	131.1	28.15	3	0.260744	3187.43	1.61944	0.969921	0.909122	0.853862	0.910968	1.0961	0.991759	1.18517	1.09101	0.834979	0.0507119
tLSDtPPAsPAGSTTPVSPFPGGR	4	XP_023746799.1	dormancy-associated protein homolog 3-like isoform X3 [Lactuca sativa]		dormancy-associated protein homolog 3-like isoform X3 [Lactuca sativa]	N-Term(iTRAQ8plex); T5(Phospho); S9(Phospho)	0	T(1): 3.9; S(3): 3.9; T(5): 92.3; S(9): 100.0; S(13): 0.0; T(14): 0.0; T(15): 0.0; S(18): 0.0	316.116	70.6	3	1.33127e-05	2761.28	0.203106	0.983512	0.955267	0.904055	0.947611	1.03246	1.11232	1.01373	1.05284	0.900057	0.0509032
qQAAVNLFsPVNtFSPk	2	XP_023751496.1	zinc finger CCCH domain-containing protein 30-like [Lactuca sativa]		zinc finger CCCH domain-containing protein 30-like [Lactuca sativa]	N-Term(iTRAQ8plex); S9(Phospho); T13(Phospho); K17(iTRAQ8plex)	0	S(9): 97.7; T(13): 51.2; S(15): 51.2	106.949	14.15	3	7.33032	2616.31	1.0584	1.00453	1.13098	1.0659	1.06713	0.970185	0.875767	0.962828	0.93626	1.13978	0.0509697
kNsDGGsDNsDEDEVDGVLESLVk	12	XP_023755515.1	COP1-interacting protein 7 [Lactuca sativa]		COP1-interacting protein 7 [Lactuca sativa]	K1(iTRAQ8plex); N-Term(iTRAQ8plex); S3(Phospho); S7(Phospho); S10(Phospho); K24(iTRAQ8plex)	1	S(3): 100.0; S(7): 100.0; S(10): 100.0; S(21): 0.0	271.018	60.13	3	0.000207544	3660.63	-3.00508	1.09528	1.10576	1.00054	1.06719	0.960642	0.877952	0.98259	0.940395	1.13483	0.0516679
nNPEENEGsGSGFk	4	XP_023738873.1	metacaspase-4-like [Lactuca sativa]		metacaspase-4-like [Lactuca sativa]	N-Term(iTRAQ8plex); S9(Phospho); K14(iTRAQ8plex)	0	S(9): 97.2; S(11): 2.8	150.416	21.79	3	0.620166	2153.99	-3.39306	1.01522	1.04766	1.17683	1.0799	0.877587	0.976111	0.919495	0.924398	1.16822	0.0525949
aAYPEVEVQPAsPPR	1	XP_023770188.1	N6-adenosine-methyltransferase MT-A70-like [Lactuca sativa]		N6-adenosine-methyltransferase MT-A70-like [Lactuca sativa]	N-Term(iTRAQ8plex); S12(Phospho)	0	Y(3): 0.0; S(12): 100.0	129.377	8.75	3	15.5889	1994.98	-2.14886	0.956039	0.927942	0.987547	0.957176	1.00614	1.10905	1.04043	1.05187	0.909972	0.0529592
fYDSSSEDGLYStGsGGGGsTGGDNSLVQAAGNR	4	XP_023767783.1	type II inositol polyphosphate 5-phosphatase 15 isoform X2 [Lactuca sativa]		type II inositol polyphosphate 5-phosphatase 15 isoform X2 [Lactuca sativa]	N-Term(iTRAQ8plex); T13(Phospho); S15(Phospho); S20(Phospho)	0	Y(2): 0.7; S(4): 80.8; S(5): 8.7; S(6): 8.7; Y(11): 17.4; S(12): 17.4; T(13): 21.0; S(15): 67.7; S(20): 67.7; T(21): 9.9; S(26): 0.0	118.734	39.3	3	0.00917595	3814.51	0.479109	0.98338	0.810613	0.894713	0.896235	1.2435	1.07129	1.03498	1.11659	0.802655	0.0536834
aADAPEATDDFGRQDDsssDEDD	2	XP_023728442.1	RRP15-like protein [Lactuca sativa]		RRP15-like protein [Lactuca sativa]	N-Term(iTRAQ8plex); S17(Phospho); S18(Phospho); S19(Phospho)	1	T(8): 0.1; S(17): 100.0; S(18): 100.0; S(19): 100.0	72.2776	15.38	3	0.407077	2973.03	2.56889	0.934712	0.932842	0.722179	0.863245	0.999388	1.2303	1.15199	1.12723	0.765813	0.0541954
qSGEsAtEE	2	XP_023732294.1	60S ribosomal protein L29-1 [Lactuca sativa]		60S ribosomal protein L29-1 [Lactuca sativa]	N-Term(iTRAQ8plex); S5(Phospho); T7(Phospho)	0	S(2): 0.0; S(5): 100.0; T(7): 100.0	158.892	23.14	2	0.02936	1401.51	-1.44676	1.28074	1.06374	1.04783	1.13077	0.956682	0.900975	0.749622	0.869093	1.30109	0.0547227
sPPAVDTGNAPLSISsPTTVAESQR	4	XP_023744189.1	probable NAD(P)H dehydrogenase (quinone) FQR1-like 2 [Lactuca sativa]		probable NAD(P)H dehydrogenase (quinone) FQR1-like 2 [Lactuca sativa]	N-Term(iTRAQ8plex); S16(Phospho)	0	S(1): 0.0; T(7): 0.0; S(13): 0.1; S(15): 96.7; S(16): 3.2; T(18): 0.0; T(19): 0.0; S(23): 0.0	231.091	39.73	3	0.0216819	2866.41	-2.44901	1.04967	1.05289	1.02815	1.04357	0.940879	1.01774	0.982436	0.980351	1.06449	0.0548462
nATQLFNDsDtEELVDtDLEDTEk	1	XP_023749276.1	uncharacterized protein LOC111897552 isoform X2 [Lactuca sativa]		uncharacterized protein LOC111897552 isoform X2 [Lactuca sativa]	N-Term(iTRAQ8plex); S9(Phospho); T11(Phospho); T17(Phospho); K24(iTRAQ8plex)	0	T(3): 0.0; S(9): 100.0; T(11): 100.0; T(17): 100.0; T(22): 0.1	111.584	23.04	3	0.724776	3590.54	3.95962	1.11231	1.00451	1.11222	1.07635	0.97051	0.973286	0.850679	0.931492	1.15551	0.0552776
ySGIHDsDsE	1	XP_023748801.1	thioredoxin domain-containing protein PLP3B-like [Lactuca sativa]		thioredoxin domain-containing protein PLP3B-like [Lactuca sativa]	N-Term(iTRAQ8plex); S7(Phospho); S9(Phospho)	0	Y(1): 0.0; S(2): 0.0; S(7): 100.0; S(9): 100.0	233.288	21.22	2	0.0728664	1573.57	-1.01091	1.08981	1.15327	1.09569	1.11292	1.04097	0.869053	0.767912	0.892644	1.24677	0.0553025
qQVEGEDsI	3	XP_023758367.1	vesicle-associated protein 4-2-like [Lactuca sativa]		vesicle-associated protein 4-2-like [Lactuca sativa]	N-Term(iTRAQ8plex); S8(Phospho)	0	S(8): 100.0	182.094	46.86	2	0.0007851	1388.62	-0.108677	1.04255	1.00276	1.09387	1.04639	0.980022	0.979208	0.92483	0.961353	1.08846	0.0569282
vNQELLSsPPk	33	XP_023736080.1	protein IWS1 homolog [Lactuca sativa]		protein IWS1 homolog [Lactuca sativa]	N-Term(iTRAQ8plex); S8(Phospho); K11(iTRAQ8plex)	0	S(7): 0.0; S(8): 100.0	277.983	43.67	3	0.0050535	1900.04	-0.930544	1.04325	1.02462	1.03852	1.03546	0.92144	0.919257	1.01385	0.951515	1.08823	0.0569371
qLsLDQFENESR	2	PLY96490.1	hypothetical protein LSAT_5X189700 [Lactuca sativa]		hypothetical protein LSAT_5X189700 [Lactuca sativa]	N-Term(iTRAQ8plex); S3(Phospho)	0	S(3): 100.0; S(11): 0.0	221.6	30.7	2	0.0689422	1849.86	-1.089	1.01563	0.899144	0.899524	0.938098	1.01592	1.11985	1.06818	1.06798	0.878382	0.057003
sGsEGssGHSGGAPAk	3	XP_023731312.1	integrin-linked protein kinase 1-like [Lactuca sativa]		integrin-linked protein kinase 1-like [Lactuca sativa]	N-Term(Acetyl); S1(Phospho); S3(Phospho); S6(Phospho); S7(Phospho); K16(iTRAQ8plex)	0	S(1): 100.0; S(3): 100.0; S(6): 94.4; S(7): 99.6; S(10): 6.0	176.361	32.91	3	0.00363294	2038.69	-0.201069	1.04801	1.061	1.06023	1.05641	1.01995	0.860583	0.9178	0.932778	1.13254	0.0574788
tDDMGsGPGsLSk	1	XP_023766652.1	ethylene-insensitive protein 2-like [Lactuca sativa]		ethylene-insensitive protein 2-like [Lactuca sativa]	N-Term(iTRAQ8plex); S6(Phospho); S10(Phospho); K13(iTRAQ8plex)	0	T(1): 0.0; S(6): 97.8; S(10): 100.0; S(12): 2.2	141.608	18.06	2	0.92382	2019.88	-5.28644	0.987637	0.95209	0.783925	0.907884	1.05596	1.16933	1.06903	1.09811	0.826772	0.0581548
lPNDPsDNGEDFFNNFPtPR	1	PLY98161.1	hypothetical protein LSAT_1X101701 [Lactuca sativa]		hypothetical protein LSAT_1X101701 [Lactuca sativa]	N-Term(iTRAQ8plex); S6(Phospho); T18(Phospho)	0	S(6): 100.0; T(18): 100.0	138.241	11.6	3	5.60383	2757.15	-0.716591	0.848252	0.865954	1.01193	0.908713	1.1688	1.15333	0.997477	1.10654	0.821223	0.0585452
gLDIEtIQQAYtV	3	XP_023744185.1	plasma membrane ATPase 1 [Lactuca sativa]		plasma membrane ATPase 1 [Lactuca sativa]	N-Term(iTRAQ8plex); T6(Phospho); T12(Phospho)	0	T(6): 100.0; Y(11): 1.8; T(12): 98.2	285.781	70.57	2	6.93269e-06	1914.88	-1.23974	0.924016	0.962307	0.943094	0.943139	1.13884	1.05032	0.99027	1.05981	0.889913	0.058843
gNsMDsFTEEIEESNDLDALk	20	XP_023735255.1	protein WVD2-like 5 [Lactuca sativa]		protein WVD2-like 5 [Lactuca sativa]	N-Term(iTRAQ8plex); S3(Phospho); S6(Phospho); K21(iTRAQ8plex)	0	S(3): 100.0; S(6): 100.0; T(8): 0.0; S(14): 0.0	401.676	49.81	3	0.00129441	3112.35	-2.70905	0.991945	0.960444	0.884989	0.945793	1.01861	1.14793	1.06015	1.07556	0.879345	0.059014
aFGSSMsLPsSAAR	1	XP_023768981.1	uncharacterized protein LOC111917536 [Lactuca sativa]		uncharacterized protein LOC111917536 [Lactuca sativa]	N-Term(iTRAQ8plex); S7(Phospho); S10(Phospho)	0	S(4): 3.4; S(5): 93.3; S(7): 3.4; S(10): 99.9; S(11): 0.1	154.331	8.26	2	6.71757	1832.79	-2.2762	0.943017	0.879393	1.01537	0.945926	1.07626	1.02078	1.09557	1.0642	0.88886	0.0590934
vPDNDQsDPDDNPsDDDNNAPDDQPQVDFTk	2	XP_023751245.1	pre-mRNA-splicing factor syf2 [Lactuca sativa]		pre-mRNA-splicing factor syf2 [Lactuca sativa]	N-Term(iTRAQ8plex); S7(Phospho); S14(Phospho); K31(iTRAQ8plex)	0	S(7): 100.0; S(14): 100.0; T(30): 0.0	101.485	44.38	3	0.0044044	4197.73	2.10317	1.04267	0.767849	0.787239	0.865919	1.08917	1.07424	1.23065	1.13135	0.765383	0.05928
sGGDDEVPAGGkDsDAsMDsDLDNWEVSQR	4	XP_023729062.1	uncharacterized protein LOC111876718 [Lactuca sativa]		uncharacterized protein LOC111876718 [Lactuca sativa]	N-Term(iTRAQ8plex); K12(iTRAQ8plex); S14(Phospho); S17(Phospho); S20(Phospho)	1	S(1): 0.0; S(14): 100.0; S(17): 100.0; S(20): 100.0; S(28): 0.0	209.235	25.77	3	0.304975	3987.61	0.151002	1.03611	0.968127	0.967652	0.99063	1.06286	1.03972	1.05448	1.05235	0.94135	0.0599555
rNsFGsQSsEIDNQEAR	12	XP_023768814.1	protein IQ-DOMAIN 32-like [Lactuca sativa]		protein IQ-DOMAIN 32-like [Lactuca sativa]	N-Term(iTRAQ8plex); S3(Phospho); S6(Phospho); S9(Phospho)	1	S(3): 100.0; S(6): 100.0; S(8): 3.7; S(9): 96.3	233.635	38.9	3	0.00627378	2468.98	-0.399738	0.986248	1.09109	1.09617	1.05783	0.876851	0.997277	0.894049	0.922726	1.14642	0.0599591
sPFGFDDsVPGsPASR	8	XP_023754119.1	epidermal growth factor receptor substrate 15-like 1 [Lactuca sativa]		epidermal growth factor receptor substrate 15-like 1 [Lactuca sativa]	N-Term(iTRAQ8plex); S8(Phospho); S12(Phospho)	0	S(1): 0.0; S(8): 100.0; S(12): 100.0; S(15): 0.0	269.156	39.86	2	0.00520512	2086.89	2.33145	1.06439	0.99164	1.06192	1.03931	0.999242	0.928187	0.919109	0.948846	1.09535	0.0600342
aNLMssDQDEDDEEEEHk	1	XP_023729119.1	DEAD-box ATP-dependent RNA helicase 31-like [Lactuca sativa]		DEAD-box ATP-dependent RNA helicase 31-like [Lactuca sativa]	N-Term(iTRAQ8plex); S5(Phospho); S6(Phospho); K18(iTRAQ8plex)	0	S(5): 100.0; S(6): 100.0	124.77	7.84	3	10.5075	2889.17	0.935693	0.879476	1.02292	0.887418	0.929939	1.12196	1.01503	1.09252	1.07651	0.863851	0.0602041
gFPPFFSSPSETstPPsEsPPMsPMDSSLSR	4	XP_023769821.1	zinc finger CCCH domain-containing protein 20 [Lactuca sativa]		zinc finger CCCH domain-containing protein 20 [Lactuca sativa]	N-Term(iTRAQ8plex); S13(Phospho); T14(Phospho); S17(Phospho); S19(Phospho); S23(Phospho)	0	Too many isoforms		12.49	3	3.64674	3974.52	5.75081	0.899835	0.870014	0.993723	0.921191	0.990695	1.13402	1.07274	1.06582	0.864304	0.0605517
mDVsDDDEEDEMQIDNk	2	PLY99591.1	hypothetical protein LSAT_5X119261 [Lactuca sativa]		hypothetical protein LSAT_5X119261 [Lactuca sativa]	N-Term(iTRAQ8plex); S4(Phospho); K17(iTRAQ8plex)	0	S(4): 100.0	173.559	24.42	3	0.298525	2716.15	1.41722	0.981407	0.956375	0.89834	0.945374	1.11592	0.990275	1.07388	1.06002	0.891841	0.0610746
tLSLPPVQIEELQPsPPVsPk	11	XP_023770721.1	uncharacterized protein LOC111919361 [Lactuca sativa]		uncharacterized protein LOC111919361 [Lactuca sativa]	N-Term(iTRAQ8plex); S15(Phospho); S19(Phospho); K21(iTRAQ8plex)	0	T(1): 0.0; S(3): 0.0; S(15): 100.0; S(19): 100.0	413.046	34.83	3	0.0698645	3024.59	-0.702364	1.00465	1.03498	1.07875	1.03946	0.962067	0.969021	0.999012	0.9767	1.06426	0.0612246
vLLPmsMFGPPAPAPAPVTEk	1	XP_023733281.1	fasciclin-like arabinogalactan protein 12 [Lactuca sativa]		fasciclin-like arabinogalactan protein 12 [Lactuca sativa]	N-Term(iTRAQ8plex); M5(Oxidation); S6(Phospho); K21(iTRAQ8plex)	0	S(6): 50.0; T(19): 50.0	87.647	3.83	4	78.2459	2854.51	-0.617031	1.13295	1.03153	1.02557	1.06335	0.985574	0.960751	0.879905	0.942077	1.12873	0.0621639
eDTISFSSVYGSEPGsPLQS	3	XP_023755953.1	65-kDa microtubule-associated protein 6-like isoform X2 [Lactuca sativa]		65-kDa microtubule-associated protein 6-like isoform X2 [Lactuca sativa]	N-Term(iTRAQ8plex); S16(Phospho)	0	T(3): 0.0; S(5): 0.0; S(7): 0.0; S(8): 0.0; Y(10): 0.0; S(12): 0.0; S(16): 99.9; S(20): 0.1	164.962	43.6	2	0.00483441	2471.13	4.58055	0.99687	0.918698	0.953699	0.956423	1.01099	1.0736	1.15987	1.08148	0.884362	0.0621858
sEVNDEADEDEsDDEEDDD	1	PLY80625.1	hypothetical protein LSAT_4X135300 [Lactuca sativa]		hypothetical protein LSAT_4X135300 [Lactuca sativa]	N-Term(iTRAQ8plex); S12(Phospho)	0	S(1): 0.0; S(12): 100.0	53.4067	7.86	2	1.98873	2555.89	7.19391	0.924377	0.950678	0.867026	0.914027	1.20636	0.978788	1.09654	1.0939	0.83557	0.0624763
sNSGLLGGQGGSMPSQSGFPSLVsPR	2	XP_023755713.1	transcriptional corepressor SEUSS [Lactuca sativa]		transcriptional corepressor SEUSS [Lactuca sativa]	N-Term(iTRAQ8plex); S1(Phospho); S24(Phospho)	0	S(1): 4.8; S(3): 95.2; S(12): 0.0; S(15): 0.0; S(17): 0.0; S(21): 0.3; S(24): 99.7	228.131	30.74	3	0.13565	2968.36	0.281469	1.05105	1.14804	0.990786	1.06329	0.898089	0.965985	0.94268	0.935585	1.1365	0.0628561
vTsISPtGDDGR	1	XP_023749141.1	BEL1-like homeodomain protein 1 [Lactuca sativa]		BEL1-like homeodomain protein 1 [Lactuca sativa]	N-Term(iTRAQ8plex); S3(Phospho); T7(Phospho)	0	T(2): 50.0; S(3): 50.0; S(5): 99.9; T(7): 0.1	138.481	24.05	2	0.159585	1668.72	0.542122	1.05933	1.07667	1.05863	1.06488	0.887952	1.03711	0.89546	0.940174	1.13264	0.0631997
sGTDVLLDLLsSGSPPAPAPAPAPATQk	3	PLY96927.1	hypothetical protein LSAT_4X7040 [Lactuca sativa]		hypothetical protein LSAT_4X7040 [Lactuca sativa]	N-Term(iTRAQ8plex); S11(Phospho); K28(iTRAQ8plex)	0	S(1): 0.0; T(3): 0.0; S(11): 33.3; S(12): 33.3; S(14): 33.3; T(26): 0.0	103.367	8.1	4	31.4255	3346.78	2.43574	1.00132	0.94682	0.829495	0.925878	1.13702	1.02078	1.08295	1.08025	0.857095	0.0640734
sAGssPNLPEIR	8	XP_023759453.1	calcium permeable stress-gated cation channel 1-like [Lactuca sativa]		calcium permeable stress-gated cation channel 1-like [Lactuca sativa]	N-Term(iTRAQ8plex); S1(Phospho); S4(Phospho); S5(Phospho)	0	S(1): 100.0; S(4): 100.0; S(5): 100.0	276.157	36.65	2	0.00740731	1771.73	-1.63894	0.968093	0.905535	0.955441	0.943023	1.00118	1.07612	0.996221	1.02451	0.920467	0.0642764
nDVEVGIGtPsPR	2	XP_023734348.1	SAC3 family protein B [Lactuca sativa]		SAC3 family protein B [Lactuca sativa]	N-Term(iTRAQ8plex); T9(Phospho); S11(Phospho)	0	T(9): 100.0; S(11): 100.0	134.792	13.03	2	3.35973	1804.82	0.251563	1.07376	0.975448	1.08855	1.04592	0.967937	0.956282	0.931767	0.951995	1.09866	0.0643621
aAVDEDDDsDVDLFGEETEEEk	77	XP_023729654.1	elongation factor 1-delta-like [Lactuca sativa]		elongation factor 1-delta-like [Lactuca sativa]	N-Term(iTRAQ8plex); S9(Phospho); K22(iTRAQ8plex)	0	S(9): 100.0; T(18): 0.0	454.103	87.69	3	2.37877e-07	3145.37	-1.43307	1.05555	1.02759	1.02168	1.03494	0.974158	0.925578	1.00757	0.969102	1.06794	0.0644628
dSPTASQLsDGEk	5	XP_023764710.1	uncharacterized protein LOC111913223 [Lactuca sativa]		uncharacterized protein LOC111913223 [Lactuca sativa]	N-Term(iTRAQ8plex); S9(Phospho); K13(iTRAQ8plex)	0	S(2): 0.0; T(4): 0.1; S(6): 0.0; S(9): 99.9	151.764	24.89	3	0.350935	2022.98	-0.8939	1.09425	1.09342	0.989864	1.05918	0.90729	0.94047	0.998445	0.948735	1.11641	0.0648966
tYssEsEDENDDDEVsEDDVTIPLSk	5	XP_023753888.1	histone deacetylase 5 [Lactuca sativa]		histone deacetylase 5 [Lactuca sativa]	N-Term(iTRAQ8plex); S3(Phospho); S4(Phospho); S6(Phospho); S16(Phospho); K26(iTRAQ8plex)	0	T(1): 0.3; Y(2): 4.8; S(3): 95.2; S(4): 99.7; S(6): 100.0; S(16): 100.0; T(21): 0.0; S(25): 0.0	369.307	44.35	3	0.00222757	3846.49	1.50772	1.02619	1.07038	1.02112	1.03923	0.900807	1.00766	0.946813	0.951758	1.09191	0.0651623
mASmFGDssGDEGEIDE	3	XP_023767400.1	uncharacterized protein LOC111916000 [Lactuca sativa]		uncharacterized protein LOC111916000 [Lactuca sativa]	N-Term(iTRAQ8plex); M1(Oxidation); M4(Oxidation); S8(Phospho); S9(Phospho)	0	S(3): 0.0; S(8): 100.0; S(9): 100.0	123.496	30.33	2	0.00912927	2272.78	-0.646852	1.05504	1.07295	1.03917	1.05572	0.934483	1.01358	0.846088	0.931383	1.1335	0.0653923
eMNAsSEsLATR	3	XP_023738322.1	protein NPGR2-like [Lactuca sativa]		protein NPGR2-like [Lactuca sativa]	N-Term(iTRAQ8plex); S5(Phospho); S8(Phospho)	0	S(5): 97.7; S(6): 2.4; S(8): 99.9; T(11): 0.0	206.936	21.11	2	0.273385	1759.73	-0.129968	0.974847	0.990466	0.920978	0.962097	1.05812	1.10804	1.00154	1.0559	0.911163	0.0655909
eGSsSTPsPLAWk	5	XP_023749608.1	uncharacterized protein LOC111897890 [Lactuca sativa]		uncharacterized protein LOC111897890 [Lactuca sativa]	N-Term(iTRAQ8plex); S4(Phospho); S8(Phospho); K13(iTRAQ8plex)	0	S(3): 2.4; S(4): 95.2; S(5): 2.4; T(6): 0.1; S(8): 100.0	158.763	16.15	2	2.4254	2115	0.0622053	0.930134	0.950063	0.978189	0.952795	1.1273	1.03554	0.999897	1.05425	0.903769	0.0660937
sGEDDDDEVWtGEsEEDAEIIk	1	XP_023731080.1	midasin [Lactuca sativa]		midasin [Lactuca sativa]	N-Term(iTRAQ8plex); T11(Phospho); S14(Phospho); K22(iTRAQ8plex)	0	S(1): 0.0; T(11): 100.0; S(14): 100.0	83.5134	21.79	3	0.623808	3236.34	-2.90499	1.09115	1.0122	1.07724	1.0602	1.02233	0.919602	0.898526	0.94682	1.11974	0.0666778
sEVHDDEEDDDDsADDDDDEDDE	4	XP_023770244.1	HMG1/2-like protein [Lactuca sativa]		HMG1/2-like protein [Lactuca sativa]	N-Term(iTRAQ8plex); S13(Phospho)	0	S(1): 0.0; S(13): 100.0	166.321	73.41	2	5.26723e-07	3024.99	2.05096	0.961858	0.729817	0.869004	0.85356	1.31971	1.13997	0.985145	1.14828	0.74334	0.0667311
dGFMGENQALNTPtDYGEDFFNNLPsPk	7	PLY99881.1	hypothetical protein LSAT_4X32040 [Lactuca sativa]		hypothetical protein LSAT_4X32040 [Lactuca sativa]	N-Term(iTRAQ8plex); T14(Phospho); S26(Phospho); K28(iTRAQ8plex)	0	T(12): 3.7; T(14): 96.1; Y(16): 0.2; S(26): 100.0	262.107	32.79	4	0.100206	3886.72	0.237453	0.954186	0.961351	1.00241	0.972648	1.03315	1.00364	1.07735	1.03804	0.937001	0.0667907
dEGsGsGsEIDEVNEDDENDENAPGYVYDVPk	1	XP_023736347.1	uncharacterized CRM domain-containing protein At3g25440, chloroplastic [Lactuca sativa]		uncharacterized CRM domain-containing protein At3g25440, chloroplastic [Lactuca sativa]	N-Term(iTRAQ8plex); S4(Phospho); S6(Phospho); S8(Phospho); K32(iTRAQ8plex)	0	S(4): 98.5; S(6): 98.5; S(8): 98.5; Y(26): 3.6; Y(28): 0.8	56.7777	19.75	3	1.05237	4292.72	2.98289	0.582349	0.782642	1.04064	0.801878	1.13922	1.42276	1.09758	1.21985	0.657357	0.0670226
lNmGGGGDFDEDEDDsDtEDEIEMk	1	XP_023770812.1	uncharacterized protein OsI_027940-like [Lactuca sativa]		uncharacterized protein OsI_027940-like [Lactuca sativa]	N-Term(iTRAQ8plex); M3(Oxidation); S16(Phospho); T18(Phospho); K25(iTRAQ8plex)	0	S(16): 100.0; T(18): 100.0	43.2797	10.34	3	6.17698	3547.39	3.69358	1.32428	0.949501	1.1407	1.13816	0.86231	0.837698	0.896187	0.865398	1.31518	0.0674422
lASPIDDPAPEsPsPPR	1	XP_023761930.1	formin-like protein 7 [Lactuca sativa]		formin-like protein 7 [Lactuca sativa]	N-Term(iTRAQ8plex); S12(Phospho); S14(Phospho)	0	S(3): 0.0; S(12): 100.0; S(14): 100.0	146.752	12.28	2	5.29152	2210	-4.52061	1.04412	1.03776	1.07923	1.0537	1.00349	0.875537	0.976181	0.951737	1.10714	0.0676502
tANAGLETVGsGLSAVGDVVGLNDDEE	16	XP_023766767.1	uncharacterized protein LOC111915335 [Lactuca sativa]		uncharacterized protein LOC111915335 [Lactuca sativa]	N-Term(iTRAQ8plex); S11(Phospho)	0	T(1): 0.0; T(8): 1.9; S(11): 96.2; S(14): 1.9	186.236	46.32	2	0.00462025	2973.4	4.32643	0.956667	1.02306	0.978787	0.986172	1.05078	1.02609	1.03651	1.03779	0.950258	0.0679937
iSNsAPVtPPLsSPTSR	5	XP_023759843.1	BES1/BZR1 homolog protein 2-like [Lactuca sativa]		BES1/BZR1 homolog protein 2-like [Lactuca sativa]	N-Term(iTRAQ8plex); S4(Phospho); T8(Phospho); S12(Phospho)	0	S(2): 0.0; S(4): 100.0; T(8): 100.0; S(12): 32.7; S(13): 32.7; T(15): 32.7; S(16): 2.0	119.925	12.16	2	5.13874	2255.01	-0.37759	1.04046	0.999161	1.15595	1.06519	0.942074	0.973513	0.89064	0.935409	1.13874	0.0697471
tHQPIAQETsETDNENER	1	XP_023744637.1	probable DNA-directed RNA polymerase I subunit RPA43 isoform X2 [Lactuca sativa]		probable DNA-directed RNA polymerase I subunit RPA43 isoform X2 [Lactuca sativa]	N-Term(iTRAQ8plex); S10(Phospho)	0	T(1): 0.0; T(9): 3.6; S(10): 92.8; T(12): 3.6	135.039	8.5	3	12.388	2483.1	-1.42169	1.0738	1.00851	1.05359	1.0453	0.985422	0.994023	0.905895	0.96178	1.08684	0.0702312
vNYVSPHQPPsPVREGSEEGsSPR	6	PLY88894.1	hypothetical protein LSAT_3X129161 [Lactuca sativa]		hypothetical protein LSAT_3X129161 [Lactuca sativa]	N-Term(iTRAQ8plex); S11(Phospho); S21(Phospho)	1	Y(3): 0.0; S(5): 0.1; S(11): 99.0; S(17): 33.6; S(21): 33.6; S(22): 33.6	71.9292	13.98	3	6.80706	3056.39	1.66625	1.06493	0.987062	1.1718	1.0746	0.975234	0.918182	0.908378	0.933931	1.15062	0.0705971
qFsGISDSk	2	XP_023768517.1	myb-like protein X [Lactuca sativa]		myb-like protein X [Lactuca sativa]	N-Term(iTRAQ8plex); S3(Phospho); K9(iTRAQ8plex)	0	S(3): 100.0; S(6): 0.0; S(8): 0.0	79.0494	16	3	2.6312	1656.85	-0.153508	0.78593	0.870765	1.04217	0.89962	1.04792	1.09258	1.16827	1.10292	0.815668	0.0708162
mEDsLGsDSVPSGPIDk	10	XP_023741377.1	histone-lysine N-methyltransferase, H3 lysine-9 specific SUVH1-like [Lactuca sativa]		histone-lysine N-methyltransferase, H3 lysine-9 specific SUVH1-like [Lactuca sativa]	N-Term(Acetyl); S4(Phospho); S7(Phospho); K17(iTRAQ8plex)	0	S(4): 100.0; S(7): 99.9; S(9): 0.1; S(12): 0.0	208.455	32.37	2	0.0323901	2239.94	0.661047	1.0275	1.04606	1.04339	1.03898	1.00485	0.982368	0.90568	0.964299	1.07745	0.071001
sYsPsPPR	3	XP_023754846.1;PLY95693.1	serine/arginine-rich SC35-like splicing factor SCL30A [Lactuca sativa]		serine/arginine-rich SC35-like splicing factor SCL30A [Lactuca sativa]	N-Term(iTRAQ8plex); S3(Phospho); S5(Phospho)	0	S(1): 0.0; Y(2): 0.1; S(3): 99.9; S(5): 100.0	143.171	36.04	3	0.00516438	1354.57	-2.65302	1.0215	0.889486	0.707318	0.872767	1.05545	1.13147	1.12023	1.10238	0.791709	0.0712183
gTEEVQsEsEEVDEEQsQDEEDEEPVSk	5	XP_023733687.1	coilin-like isoform X2 [Lactuca sativa]		coilin-like isoform X2 [Lactuca sativa]	N-Term(iTRAQ8plex); S7(Phospho); S9(Phospho); S17(Phospho); K28(iTRAQ8plex)	0	T(2): 0.0; S(7): 100.0; S(9): 100.0; S(17): 100.0; S(27): 0.0	160.129	60.69	3	7.73335e-05	4044.61	0.841647	0.90908	0.929192	0.841939	0.893404	1.16353	1.07355	0.945194	1.06076	0.842233	0.0713089
nYESsGsGDDETFYQETPQTTTINNNQ	3	PLY65591.1	hypothetical protein LSAT_7X95440 [Lactuca sativa]		hypothetical protein LSAT_7X95440 [Lactuca sativa]	N-Term(iTRAQ8plex); S5(Phospho); S7(Phospho)	0	Y(2): 0.5; S(4): 93.7; S(5): 11.7; S(7): 94.1; T(12): 0.0; Y(14): 0.0; T(17): 0.0; T(20): 0.0; T(21): 0.0; T(22): 0.0	96.0492	3.29	3	36.8956	3504.39	0.00827443	1.02007	0.937722	0.906475	0.954755	1.03523	1.0324	1.11777	1.0618	0.899185	0.0715504
qsSMMTssQMIR	1	XP_023728196.1	sugar transporter ERD6-like 6 [Lactuca sativa]		sugar transporter ERD6-like 6 [Lactuca sativa]	N-Term(iTRAQ8plex); S2(Phospho); S7(Phospho); S8(Phospho)	0	S(2): 95.3; S(3): 4.7; T(6): 8.9; S(7): 95.6; S(8): 95.6	97.3272	3.82	2	6.3073	1930.72	-0.187057	0.871269	0.849376	0.969648	0.896764	1.16297	1.23681	0.957634	1.11914	0.801299	0.0716282
mVAssDEEESSEEk	4	XP_023756396.1	protein RETICULATA-RELATED 3, chloroplastic-like [Lactuca sativa]		protein RETICULATA-RELATED 3, chloroplastic-like [Lactuca sativa]	N-Term(iTRAQ8plex); M1(Oxidation); S4(Phospho); S5(Phospho); K14(iTRAQ8plex)	0	S(4): 100.0; S(5): 100.0; S(10): 0.0; S(11): 0.0	187.802	22.73	2	0.286668	2340.96	-0.243956	1.01917	0.886745	0.905578	0.937165	1.0215	1.05378	1.04664	1.04064	0.900567	0.0716399
sTAAMDAEDGssssEEEEEVkk	1	XP_023738255.1	uncharacterized protein At4g26485-like [Lactuca sativa]		uncharacterized protein At4g26485-like [Lactuca sativa]	N-Term(Acetyl); S11(Phospho); S12(Phospho); S13(Phospho); S14(Phospho); K21(iTRAQ8plex); K22(iTRAQ8plex)	1	S(1): 0.0; T(2): 0.0; S(11): 100.0; S(12): 100.0; S(13): 100.0; S(14): 100.0	84.9262	24.26	3	0.17305	3286.25	0.45879	0.743	0.928119	0.776661	0.815927	1.3812	0.909424	1.28763	1.19275	0.684072	0.0719497
wDEtPtPGR	5	XP_023763576.1	splicing factor 3B subunit 1 [Lactuca sativa]		splicing factor 3B subunit 1 [Lactuca sativa]	N-Term(iTRAQ8plex); T4(Phospho); T6(Phospho)	0	T(4): 100.0; T(6): 100.0	233.804	16.66	2	0.444495	1522.63	-0.161572	1.03757	0.999183	1.07379	1.03685	0.990653	0.988164	0.963287	0.980701	1.05725	0.0731266
kTsIGGGGGAIGGsFSR	12	XP_023736080.1	protein IWS1 homolog [Lactuca sativa]		protein IWS1 homolog [Lactuca sativa]	K1(iTRAQ8plex); N-Term(iTRAQ8plex); S3(Phospho); S14(Phospho)	1	T(2): 94.0; S(3): 6.0; S(14): 94.0; S(16): 6.0	105.128	31.79	3	0.0994649	2277.12	-0.812517	0.936724	0.992178	0.946158	0.958353	1.07505	0.983045	1.05315	1.03708	0.924086	0.0732164
lEEWLGGsDD	1	XP_023764693.1	BLOC-1-related complex subunit 8 homolog [Lactuca sativa]		BLOC-1-related complex subunit 8 homolog [Lactuca sativa]	N-Term(iTRAQ8plex); S8(Phospho)	0	S(8): 100.0	132.631	19.44	2	0.282132	1504.65	1.61345	1.05013	1.0673	0.985883	1.03444	0.948295	0.97189	0.986605	0.96893	1.06761	0.0735051
tEMGAEGGGsPsPsPLSTSk	3	XP_023747909.1	heat shock factor-binding protein 1-like isoform X2 [Lactuca sativa]		heat shock factor-binding protein 1-like isoform X2 [Lactuca sativa]	N-Term(iTRAQ8plex); S10(Phospho); S12(Phospho); S14(Phospho); K20(iTRAQ8plex)	0	T(1): 0.0; S(10): 99.8; S(12): 99.2; S(14): 92.7; S(17): 7.3; T(18): 0.8; S(19): 0.2	110.832	16.74	3	1.91818	2725.16	-2.55793	1.00271	0.974227	0.953834	0.976923	1.12408	1.00926	1.0588	1.06405	0.91812	0.0735293
dLSTDQQsEDDDSPLTPGR	3	XP_023734110.1	uncharacterized protein LOC111881964 [Lactuca sativa]		uncharacterized protein LOC111881964 [Lactuca sativa]	N-Term(iTRAQ8plex); S8(Phospho)	0	S(3): 0.1; T(4): 0.1; S(8): 99.8; S(13): 0.0; T(16): 0.0	139.666	22.4	2	0.430429	2460.05	-6.92147	0.939757	0.926952	0.92212	0.929609	1.0132	1.12812	0.977477	1.0396	0.8942	0.0740146
sDADEGQSGFsDEDDYNR	3	XP_023768494.1	LOW QUALITY PROTEIN: transcription elongation factor SPT6-like [Lactuca sativa]		LOW QUALITY PROTEIN: transcription elongation factor SPT6-like [Lactuca sativa]	N-Term(iTRAQ8plex); S11(Phospho)	0	S(1): 0.0; S(8): 98.1; S(11): 1.9; Y(16): 0.0	180.844	31.98	2	0.0169243	2390.91	-2.46441	1.13343	0.994242	1.05333	1.06033	0.97504	0.964979	0.941858	0.960626	1.10379	0.0741987
mEEASsPLSQPk	4	XP_023757070.1	WD-40 repeat-containing protein MSI4-like [Lactuca sativa]		WD-40 repeat-containing protein MSI4-like [Lactuca sativa]	N-Term(Acetyl); S6(Phospho); K12(iTRAQ8plex)	0	S(5): 49.1; S(6): 49.1; S(9): 1.8	78.5279	6.84	2	13.1143	1729.8	0.00249866	1.03254	1.07098	1.05008	1.0512	0.975011	1.0061	0.873656	0.95159	1.10468	0.0743519
aLsAsPEEETcEITVsPLPsPk	1	PLY71078.1	hypothetical protein LSAT_2X85241 [Lactuca sativa]		hypothetical protein LSAT_2X85241 [Lactuca sativa]	N-Term(iTRAQ8plex); S3(Phospho); S5(Phospho); C11(Carbamidomethyl); S16(Phospho); S20(Phospho); K22(iTRAQ8plex)	0	S(3): 100.0; S(5): 100.0; T(10): 0.0; T(14): 0.0; S(16): 100.0; S(20): 100.0	297.224	42.68	3	0.00775816	3270.42	-1.13648	0.997728	1.12535	1.0683	1.06379	0.970249	0.983117	0.872546	0.941971	1.12933	0.0745285
aTsPPPPPPPPPPPR	4	XP_023745312.1	protein IQ-DOMAIN 14-like isoform X2 [Lactuca sativa]		protein IQ-DOMAIN 14-like isoform X2 [Lactuca sativa]	N-Term(iTRAQ8plex); S3(Phospho)	0	T(2): 50.0; S(3): 50.0	221.234	23.07	3	0.614248	1885.99	0.289614	0.990114	0.929904	0.961431	0.960483	1.11374	1.04908	0.994746	1.05252	0.912553	0.07531
aVSILQTFFLDDVIPtDAVsDNDEEEDk	1	PLY64266.1	hypothetical protein LSAT_7X3821 [Lactuca sativa]		hypothetical protein LSAT_7X3821 [Lactuca sativa]	N-Term(iTRAQ8plex); T16(Phospho); S20(Phospho); K28(iTRAQ8plex)	0	S(3): 0.0; T(7): 0.0; T(16): 100.0; S(20): 100.0	321.809	52.51	3	0.00149716	3893.8	-3.17365	1.09042	1.11206	1.01604	1.07284	1.03288	0.86195	0.897217	0.930684	1.15274	0.0757947
dVSALDTSEVsDDEEDDIVGEk	5	XP_023732365.1	alpha-1,4 glucan phosphorylase L-1 isozyme, chloroplastic/amyloplastic [Lactuca sativa]		alpha-1,4 glucan phosphorylase L-1 isozyme, chloroplastic/amyloplastic [Lactuca sativa]	N-Term(iTRAQ8plex); S11(Phospho); K22(iTRAQ8plex)	0	S(3): 0.0; T(7): 1.7; S(8): 49.2; S(11): 49.2	194.188	46.47	3	0.00409595	3055.39	-3.27056	0.906111	0.987638	0.869352	0.921034	1.10604	0.9714	1.16556	1.081	0.852019	0.0760405
mEsPQSVVsPFk	2	XP_023762164.1	uncharacterized protein LOC111910554 [Lactuca sativa]		uncharacterized protein LOC111910554 [Lactuca sativa]	N-Term(Acetyl); S3(Phospho); S9(Phospho); K12(iTRAQ8plex)	0	S(3): 100.0; S(6): 0.1; S(9): 99.9	120.444	36.43	2	0.0111594	1841.81	-0.720461	0.974466	0.964046	0.986553	0.975022	1.00906	1.00741	1.07571	1.03073	0.945954	0.076096
sDLDIQIPSAFDPFAEANAEDSGAGSk	1	XP_023765907.1	protein translation factor SUI1 homolog [Lactuca sativa]		protein translation factor SUI1 homolog [Lactuca sativa]	N-Term(Acetyl); S1(Phospho); K27(iTRAQ8plex)	0	S(1): 100.0; S(9): 0.0; S(22): 0.0; S(26): 0.0	188.391	32.32	3	0.100699	3178.43	-4.78067	0.763037	0.977617	0.910959	0.883871	1.06665	1.0247	1.27604	1.12246	0.787441	0.0761265
lSGQNVGGPPSYEDAVsDGHsPVDTk	16	XP_023741696.1	clathrin interactor EPSIN 2-like isoform X2 [Lactuca sativa]		clathrin interactor EPSIN 2-like isoform X2 [Lactuca sativa]	N-Term(iTRAQ8plex); S17(Phospho); S21(Phospho); K26(iTRAQ8plex)	0	S(2): 0.0; S(11): 0.4; Y(12): 0.4; S(17): 99.2; S(21): 100.0; T(25): 0.0	149.536	25.94	3	0.549861	3381.55	-1.02422	0.966818	0.876835	0.839948	0.894534	1.19389	1.10287	0.953734	1.0835	0.8256	0.0762373
dTsPFHsGVISk	2	XP_023767952.1	probable serine/threonine-protein kinase PBL10 [Lactuca sativa]		probable serine/threonine-protein kinase PBL10 [Lactuca sativa]	N-Term(iTRAQ8plex); S3(Phospho); S7(Phospho); K12(iTRAQ8plex)	0	T(2): 50.0; S(3): 50.0; S(7): 99.9; S(11): 0.0	84.99	14.76	3	3.59928	2042.98	-0.738135	1.12008	1.19193	0.969634	1.09388	0.954418	0.813204	0.946494	0.904705	1.2091	0.0770773
dYNsDDsEDDDNDIEEEEEEAAPPLk	2	XP_023728442.1	RRP15-like protein [Lactuca sativa]		RRP15-like protein [Lactuca sativa]	N-Term(iTRAQ8plex); S4(Phospho); S7(Phospho); K26(iTRAQ8plex)	0	Y(2): 0.0; S(4): 100.0; S(7): 100.0	330.603	44.1	3	0.00348973	3751.52	3.55801	1.03567	0.881261	0.901373	0.939433	1.08142	1.07966	1.02494	1.062	0.884586	0.0774851
aVVTsSGGGDSGEAEAER	3	PLY95329.1	hypothetical protein LSAT_8X145000 [Lactuca sativa]		hypothetical protein LSAT_8X145000 [Lactuca sativa]	N-Term(iTRAQ8plex); S5(Phospho)	0	T(4): 1.7; S(5): 48.3; S(6): 48.3; S(11): 1.7	99.673	3.38	2	30.6055	2062.92	-1.94639	0.931905	0.938809	1.01149	0.960733	0.999725	1.08362	1.0475	1.04361	0.920582	0.0780511
tASssPEHPsLR	3	XP_023741217.1	serine/threonine-protein kinase EDR1-like isoform X2 [Lactuca sativa]		serine/threonine-protein kinase EDR1-like isoform X2 [Lactuca sativa]	N-Term(iTRAQ8plex); S4(Phospho); S5(Phospho); S10(Phospho)	0	T(1): 40.9; S(3): 40.9; S(4): 59.1; S(5): 59.1; S(10): 100.0	80.1184	8.03	2	4.04514	1812.73	-0.20852	1.16327	1.01599	1.01644	1.06523	0.929604	0.9007	0.982057	0.937453	1.1363	0.0789674
iVsPNPsPDAALTGSMR	11	PLY71261.1	hypothetical protein LSAT_5X81060 [Lactuca sativa]		hypothetical protein LSAT_5X81060 [Lactuca sativa]	N-Term(iTRAQ8plex); S3(Phospho); S7(Phospho)	0	S(3): 100.0; S(7): 100.0; T(13): 0.0; S(15): 0.0	349.645	44.35	2	0.00336982	2177	0.019882	0.999379	1.01702	1.09181	1.03607	0.987586	0.959249	0.938297	0.961711	1.07732	0.0790542
iEEHDDVSDsEkEyDMLPk	6	XP_023771283.1	WEB family protein At3g02930, chloroplastic [Lactuca sativa]		WEB family protein At3g02930, chloroplastic [Lactuca sativa]	N-Term(iTRAQ8plex); S10(Phospho); K12(iTRAQ8plex); Y14(Phospho); K19(iTRAQ8plex)	1	S(8): 50.9; S(10): 50.9; Y(14): 98.1	127.447	19.52	3	2.30521	3351.55	-1.00993	1.15389	1.11539	0.974914	1.0814	0.855703	0.881067	1.00583	0.914198	1.18289	0.0794813
lADIsDGEsDEGGR	13	XP_023738759.1	protein EMSY-LIKE 3-like [Lactuca sativa]		protein EMSY-LIKE 3-like [Lactuca sativa]	N-Term(iTRAQ8plex); S5(Phospho); S9(Phospho)	0	S(5): 100.0; S(9): 100.0	383.701	48.08	2	0.00055548	1884.76	-0.130507	1.04055	1.01314	1.05654	1.03674	0.968686	1.01464	0.925315	0.969548	1.0693	0.0795266
sEIDYAAGNLsDSEVVsPTSR	2	PLY74167.1	hypothetical protein LSAT_9X12080 [Lactuca sativa]		hypothetical protein LSAT_9X12080 [Lactuca sativa]	N-Term(iTRAQ8plex); S11(Phospho); S17(Phospho)	0	S(1): 0.0; Y(5): 0.0; S(11): 99.5; S(13): 0.5; S(17): 93.4; T(19): 6.1; S(20): 0.4	130.986	17.7	3	1.8358	2661.16	-0.533127	1.11161	1.00728	1.0991	1.07266	1.0321	0.891856	0.867784	0.93058	1.15268	0.0799262
dGALtsNDDLEsISAR	3	XP_023773048.1	histone acetyltransferase GCN5 [Lactuca sativa]		histone acetyltransferase GCN5 [Lactuca sativa]	N-Term(iTRAQ8plex); T5(Phospho); S6(Phospho); S12(Phospho)	0	T(5): 100.0; S(6): 100.0; S(12): 99.8; S(14): 0.2	139.813	31.99	2	0.0229566	2207.87	-4.30755	1.01826	0.975618	0.956602	0.983494	1.08379	1.07459	1.00581	1.05473	0.932461	0.0805811
sGSEGssGHSGGAPAk	6	XP_023731312.1	integrin-linked protein kinase 1-like [Lactuca sativa]		integrin-linked protein kinase 1-like [Lactuca sativa]	N-Term(Acetyl); S6(Phospho); S7(Phospho); K16(iTRAQ8plex)	0	S(1): 92.5; S(3): 4.0; S(6): 96.0; S(7): 7.5; S(10): 0.0	164.517	21.94	2	0.21655	1878.76	1.40468	1.07296	0.807684	0.828504	0.903048	1.14747	1.10536	1.07029	1.10771	0.815241	0.0807286
sDSEPLSSsPGLGNDsVAVPSPPPTENSAATAk	4	XP_023734801.1	putative DNA-binding protein At1g48610 [Lactuca sativa]		putative DNA-binding protein At1g48610 [Lactuca sativa]	N-Term(iTRAQ8plex); S9(Phospho); S16(Phospho); K33(iTRAQ8plex)	0	S(1): 0.0; S(3): 0.7; S(7): 4.6; S(8): 49.4; S(9): 49.4; S(16): 88.5; S(21): 7.4; T(25): 0.0; S(28): 0.0; T(31): 0.0	111.806	21.43	4	1.87093	3934.83	-2.95976	1.11174	0.976805	1.1123	1.06695	0.972787	0.928687	0.969987	0.957154	1.11471	0.0809084
nDPNYDsGEEPYQLVGSSVTDPLDEYk	2	XP_023732729.1	uncharacterized protein LOC111880529 [Lactuca sativa]		uncharacterized protein LOC111880529 [Lactuca sativa]	N-Term(iTRAQ8plex); S7(Phospho); K27(iTRAQ8plex)	0	Y(5): 2.5; S(7): 97.5; Y(12): 0.0; S(17): 0.0; S(18): 0.0; T(20): 0.0; Y(26): 0.0	324.497	51.22	3	0.00192511	3719.72	3.26818	0.975766	0.957785	0.821878	0.918476	1.18394	0.999862	1.07256	1.08546	0.846166	0.0820309
sYSNLLDLASGELPsPSFTR	4	XP_023769155.1	alpha,alpha-trehalose-phosphate synthase [UDP-forming] 6-like [Lactuca sativa]		alpha,alpha-trehalose-phosphate synthase [UDP-forming] 6-like [Lactuca sativa]	N-Term(iTRAQ8plex); S1(Phospho); S15(Phospho)	0	S(1): 96.9; Y(2): 3.0; S(3): 0.1; S(10): 0.0; S(15): 94.3; S(17): 2.9; T(19): 2.9	326.47	24.04	3	0.50175	2618.2	-1.93394	1.05452	1.00225	0.998892	1.01855	0.959917	0.974771	0.985959	0.973549	1.04623	0.0824992
mDYGLsDssGtDDDFPPPHQNk	28	XP_023742164.1	protein EMSY-LIKE 3-like isoform X1 [Lactuca sativa]		protein EMSY-LIKE 3-like isoform X1 [Lactuca sativa]	N-Term(Acetyl); S6(Phospho); S8(Phospho); S9(Phospho); T11(Phospho); K22(iTRAQ8plex)	0	Y(3): 0.2; S(6): 99.9; S(8): 100.0; S(9): 100.0; T(11): 100.0	111.89	11.84	3	1.08342	3089.09	-0.319697	0.921114	1.00798	1.00049	0.976527	1.05287	1.05299	1.02574	1.04386	0.935494	0.0826169
eGFsDGF	1	XP_023770023.1	proline-rich receptor-like protein kinase PERK1 [Lactuca sativa]		proline-rich receptor-like protein kinase PERK1 [Lactuca sativa]	N-Term(iTRAQ8plex); S4(Phospho)	0	S(4): 100.0	107.609	23.15	2	0.0547115	1142.47	-2.90197	1.09326	1.33427	1.00678	1.14477	0.833229	0.711574	1.00012	0.848306	1.34948	0.0828193
nTTAAAPSsPtTTDTVAATSPPTTR	1	XP_023765102.1	transcription factor GTE4-like [Lactuca sativa]		transcription factor GTE4-like [Lactuca sativa]	N-Term(iTRAQ8plex); S9(Phospho); T11(Phospho)	0	T(2): 0.0; T(3): 0.0; S(8): 0.7; S(9): 89.9; T(11): 7.4; T(12): 0.7; T(13): 0.7; T(15): 0.7; T(19): 46.1; S(20): 46.1; T(23): 3.8; T(24): 3.8	48.9533	3.69	3	63.3007	2881.32	1.22845	0.998378	0.869737	0.959094	0.942403	0.990297	1.10003	1.10727	1.06587	0.884167	0.0829113
aVEALNsPTTATtPLFk	6	XP_023764915.1	zinc finger protein ZAT10-like [Lactuca sativa]		zinc finger protein ZAT10-like [Lactuca sativa]	N-Term(Acetyl); S7(Phospho); T13(Phospho); K17(iTRAQ8plex)	0	S(7): 46.9; T(9): 46.9; T(10): 9.6; T(12): 9.6; T(13): 87.0	71.0718	0.88	3	114.403	2267.09	0.0126094	1.18321	1.00889	1.01727	1.06979	0.900556	0.958312	0.941532	0.933466	1.14604	0.0830199
qNsEVsYYADDEDANR	1	XP_023755772.1	zinc finger protein-like 1 homolog [Lactuca sativa]		zinc finger protein-like 1 homolog [Lactuca sativa]	N-Term(iTRAQ8plex); S3(Phospho); S6(Phospho)	0	S(3): 100.0; S(6): 99.6; Y(7): 0.4; Y(8): 0.0	115.863	6.71	3	5.3966	2339.9	-0.670196	1.10675	1.06977	1.09715	1.09122	1.05173	0.787132	0.902303	0.913722	1.19426	0.0835363
kQEEEDNEEEEEEDEVsEsEEDEsNEEDEk	5	XP_023747195.1	protein DEK-like isoform X2 [Lactuca sativa]		protein DEK-like isoform X2 [Lactuca sativa]	K1(iTRAQ8plex); N-Term(iTRAQ8plex); S17(Phospho); S19(Phospho); S24(Phospho); K30(iTRAQ8plex)	1	S(17): 100.0; S(19): 100.0; S(24): 100.0	191.626	40.06	4	0.0077275	4797.86	-0.791653	0.983125	0.979156	0.951011	0.971097	1.09971	1.09695	0.985109	1.06059	0.91562	0.0838516
eVVDsDDEADLSk	3	XP_023750767.1	suppressor of mec-8 and unc-52 protein homolog 2 [Lactuca sativa]		suppressor of mec-8 and unc-52 protein homolog 2 [Lactuca sativa]	N-Term(iTRAQ8plex); S5(Phospho); K13(iTRAQ8plex)	0	S(5): 100.0; S(12): 0.0	161.306	24.26	3	0.376098	2110	-4.29789	1.00979	0.944681	0.956852	0.97044	1.00717	1.03234	1.01795	1.01915	0.952205	0.083882
sIsEIGFSDESk	1	XP_023761973.1	uncharacterized protein LOC111910361 [Lactuca sativa]		uncharacterized protein LOC111910361 [Lactuca sativa]	N-Term(iTRAQ8plex); S3(Phospho); K12(iTRAQ8plex)	0	S(1): 0.1; S(3): 99.9; S(8): 0.0; S(11): 0.0	120.89	21.24	3	1.02371	1986.99	-0.352992	0.923542	0.989082	0.903774	0.938799	0.967884	1.10802	1.12363	1.06651	0.88025	0.0840805
tTSDSISsPTEQGIEVR	6	XP_023735176.1	titin isoform X2 [Lactuca sativa]		titin isoform X2 [Lactuca sativa]	N-Term(iTRAQ8plex); S8(Phospho)	0	T(1): 0.0; T(2): 0.0; S(3): 0.0; S(5): 0.0; S(7): 0.1; S(8): 99.9; T(10): 0.0	219.495	8.69	2	16.3195	2191.04	-0.260192	0.957565	1.01032	0.941142	0.969675	1.03287	1.0014	1.03809	1.02412	0.946839	0.0841415
iNsGGLSAAMsPk	3	XP_023759238.1	BTB/POZ domain-containing protein At5g48800 [Lactuca sativa]		BTB/POZ domain-containing protein At5g48800 [Lactuca sativa]	N-Term(iTRAQ8plex); S3(Phospho); S11(Phospho); K13(iTRAQ8plex)	0	S(3): 100.0; S(7): 0.0; S(11): 100.0	261.064	25.99	3	0.267755	2000.97	-1.8373	1.04307	0.961998	0.890792	0.965288	1.1275	1.06007	1.05166	1.07974	0.893998	0.084416
sASSAASLTPDEkDGATTDSsAQDGEsstVEA	1	XP_023760377.1	MFP1 attachment factor 1-like [Lactuca sativa]		MFP1 attachment factor 1-like [Lactuca sativa]	N-Term(iTRAQ8plex); K13(iTRAQ8plex); S21(Phospho); S27(Phospho); S28(Phospho); T29(Phospho)	1	Too many isoforms		19.68	3	1.07808	4000.6	-0.790847	0.988416	0.806754	0.966367	0.920512	1.18918	1.03569	1.05151	1.09213	0.842861	0.0845178
mEDYMDQssGGDtDGsDsEVEEYVDk	18	XP_023757257.1	protein INVOLVED IN DE NOVO 2-like [Lactuca sativa]		protein INVOLVED IN DE NOVO 2-like [Lactuca sativa]	N-Term(Acetyl); S8(Phospho); S9(Phospho); T13(Phospho); S16(Phospho); S18(Phospho); K26(iTRAQ8plex)	0	Y(4): 26.5; S(8): 94.2; S(9): 94.2; T(13): 94.7; S(16): 94.7; S(18): 94.7; Y(23): 1.0	96.2036	23.37	3	0.201362	3634.13	-0.751635	0.942193	0.909274	0.995981	0.949149	0.978172	1.17036	1.15547	1.10133	0.861818	0.0846441
mNTsLPVsPtSSPLR	5	PLY96390.1	hypothetical protein LSAT_2X37381 [Lactuca sativa]		hypothetical protein LSAT_2X37381 [Lactuca sativa]	N-Term(iTRAQ8plex); S4(Phospho); S8(Phospho); T10(Phospho)	0	T(3): 0.1; S(4): 99.9; S(8): 99.9; T(10): 0.1; S(11): 0.3; S(12): 99.7	192.155	20.17	2	0.663993	2130.93	0.917559	1.00902	1.10145	1.03601	1.04883	1.00526	0.893194	0.957145	0.951866	1.10186	0.0846678
sVDYssDEENEtENEIDNR	2	XP_023761450.1	probable inactive receptor kinase At5g67200 [Lactuca sativa]		probable inactive receptor kinase At5g67200 [Lactuca sativa]	N-Term(iTRAQ8plex); S1(Phospho); S5(Phospho); S6(Phospho); T12(Phospho)	0	S(1): 100.0; Y(4): 0.5; S(5): 99.5; S(6): 100.0; T(12): 100.0	173.668	39.19	3	0.00129541	2868.96	-4.13746	0.916159	0.949207	0.985656	0.950341	1.13827	0.994817	1.03795	1.05701	0.899081	0.0857477
lPVTADLIsDDDR	6	XP_023761541.1	EEF1A lysine methyltransferase 2 [Lactuca sativa]		EEF1A lysine methyltransferase 2 [Lactuca sativa]	N-Term(iTRAQ8plex); S9(Phospho)	0	T(4): 0.0; S(9): 100.0	238.111	50.78	2	0.000789227	1813.89	0.626172	1.04217	0.986379	1.14075	1.05643	0.946835	0.932917	0.972505	0.950753	1.11115	0.0859157
nGEsEsEDEAPR	2	XP_023758146.1	30-kDa cleavage and polyadenylation specificity factor 30 [Lactuca sativa]		30-kDa cleavage and polyadenylation specificity factor 30 [Lactuca sativa]	N-Term(iTRAQ8plex); S4(Phospho); S6(Phospho)	0	S(4): 100.0; S(6): 100.0	223.498	15.93	2	0.371418	1783.67	-3.50619	0.981689	0.932279	0.866282	0.92675	1.15131	0.966802	1.09904	1.07238	0.864196	0.0861499
gGDYsEsPPPVR	27	XP_023757249.1	serine/arginine-rich SC35-like splicing factor SCL30 [Lactuca sativa]		serine/arginine-rich SC35-like splicing factor SCL30 [Lactuca sativa]	N-Term(iTRAQ8plex); S5(Phospho); S7(Phospho)	0	Y(4): 0.1; S(5): 99.9; S(7): 100.0	257.053	27.1	2	0.0696095	1724.72	-0.793016	0.983871	0.977056	1.00124	0.98739	1.04695	1.04743	0.995232	1.02987	0.958753	0.0862241
tATQNTEILSSsPk	9	XP_023732729.1	uncharacterized protein LOC111880529 [Lactuca sativa]		uncharacterized protein LOC111880529 [Lactuca sativa]	N-Term(iTRAQ8plex); S12(Phospho); K14(iTRAQ8plex)	0	T(1): 0.0; T(3): 0.0; T(6): 0.0; S(10): 0.0; S(11): 0.0; S(12): 100.0	262.646	39.54	3	0.0164592	2165.13	0.59447	1.02181	1.01521	1.02178	1.0196	0.967549	0.976125	1.01495	0.986208	1.03386	0.0862713
tLSDTPPASPAGstPPVsPFAGSEAFR	1	XP_023751833.1	dormancy-associated protein homolog 3-like isoform X1 [Lactuca sativa]		dormancy-associated protein homolog 3-like isoform X1 [Lactuca sativa]	N-Term(iTRAQ8plex); S13(Phospho); T14(Phospho); S18(Phospho)	0	T(1): 18.0; S(3): 18.0; T(5): 82.0; S(9): 81.9; S(13): 0.1; T(14): 0.1; S(18): 8.0; S(23): 92.0	93.5389	10.67	3	12.2428	3188.4	1.64047	0.953181	0.88587	1.02903	0.956028	1.06653	1.02577	1.07048	1.05426	0.906826	0.0881163
aPFsSSFPDSVPGTPAYsFAGsPR	2	XP_023770376.1	epidermal growth factor receptor substrate 15-like 1 isoform X2 [Lactuca sativa]		epidermal growth factor receptor substrate 15-like 1 isoform X2 [Lactuca sativa]	N-Term(iTRAQ8plex); S4(Phospho); S18(Phospho); S22(Phospho)	0	S(4): 0.0; S(5): 0.1; S(6): 0.1; S(10): 99.7; T(14): 99.9; Y(17): 0.1; S(18): 0.0; S(22): 100.0	258.848	27.93	3	0.141254	2973.24	-2.56632	1.0232	1.13634	0.998179	1.05257	0.976533	0.95674	0.912299	0.948524	1.10969	0.0890994
yLNssDDDEEDER	3	XP_023751135.1	uncharacterized protein LOC111899525 [Lactuca sativa]		uncharacterized protein LOC111899525 [Lactuca sativa]	N-Term(iTRAQ8plex); S4(Phospho); S5(Phospho)	0	Y(1): 0.0; S(4): 100.0; S(5): 100.0	306.626	45.39	2	0.000450946	2050.75	0.0753926	0.997254	0.981809	0.979875	0.986313	1.03595	1.0529	0.993628	1.02749	0.95992	0.0895689
nVEEDEEsDsDSkPLk	50	XP_023745783.1	E3 ubiquitin-protein ligase RBBP6-like [Lactuca sativa]		E3 ubiquitin-protein ligase RBBP6-like [Lactuca sativa]	N-Term(iTRAQ8plex); S8(Phospho); S10(Phospho); K13(iTRAQ8plex); K16(iTRAQ8plex)	0	S(8): 100.0; S(10): 100.0; S(12): 0.0	309.626	19.35	3	2.17307	2893.35	-0.389871	1.05114	1.04985	0.997808	1.03293	1.0031	0.936166	0.982531	0.973933	1.06058	0.0896744
eGDHHDGGsssSSDSD	3	XP_023768019.1	protein SRC1 [Lactuca sativa]		protein SRC1 [Lactuca sativa]	N-Term(iTRAQ8plex); S9(Phospho); S10(Phospho); S11(Phospho)	0	S(9): 99.8; S(10): 4.3; S(11): 93.9; S(12): 50.9; S(13): 50.9; S(15): 0.1	158.727	27.23	2	0.00454162	2119.64	-1.02909	0.722227	1.01978	0.868354	0.870119	1.20389	1.24045	0.970964	1.13843	0.764312	0.0897992
sFFTGEGTTQsPsPSENFGGPNFDIAR	10	XP_023758019.1	uncharacterized protein LOC111906495 isoform X5 [Lactuca sativa]		uncharacterized protein LOC111906495 isoform X5 [Lactuca sativa]	N-Term(iTRAQ8plex); S11(Phospho); S13(Phospho)	0	S(1): 0.0; T(4): 0.0; T(8): 0.1; T(9): 3.5; S(11): 96.3; S(13): 100.0; S(15): 0.0	335.899	82.61	3	6.89184e-07	3311.41	-2.83609	1.07019	1.04752	0.990762	1.03616	0.966204	1.00299	0.944541	0.971245	1.06683	0.0898434
tSsFGsAssSPSLASLPPIR	25	XP_023759138.1	mediator of RNA polymerase II transcription subunit 15 [Lactuca sativa]		mediator of RNA polymerase II transcription subunit 15 [Lactuca sativa]	N-Term(iTRAQ8plex); S3(Phospho); S6(Phospho); S8(Phospho); S9(Phospho)	0	T(1): 0.3; S(2): 4.9; S(3): 94.8; S(6): 9.2; S(8): 93.9; S(9): 65.6; S(10): 65.6; S(12): 65.6; S(15): 0.0	143.701	35.1	2	0.0207822	2573.08	4.72374	1.02573	1.01612	1.04514	1.02899	0.965708	1.01885	0.945466	0.976675	1.05357	0.0898617
aITSLPVsPSAsPLR	9	XP_023732191.1	mitogen-activated protein kinase kinase kinase 3-like [Lactuca sativa]		mitogen-activated protein kinase kinase kinase 3-like [Lactuca sativa]	N-Term(iTRAQ8plex); S8(Phospho); S12(Phospho)	0	T(3): 0.0; S(4): 0.0; S(8): 99.9; S(10): 2.7; S(12): 97.4	232.359	24.66	2	0.410375	1959.99	0.148141	0.970879	1.05126	1.11209	1.04474	0.942709	0.975136	0.930131	0.949326	1.10051	0.0908953
qPISFEDsPDWEEPDVEVR	3	PLY70426.1	hypothetical protein LSAT_1X63041 [Lactuca sativa]		hypothetical protein LSAT_1X63041 [Lactuca sativa]	N-Term(iTRAQ8plex); S8(Phospho)	0	S(4): 4.0; S(8): 96.0	131.104	10.56	3	10.8296	2658.19	-0.000324469	0.9643	0.95485	0.929976	0.949709	1.00466	1.14679	1.01209	1.05451	0.900615	0.091086
gsDADMEDyGFEYSEEEPEEQDVDIENQYYNSk	3	XP_023768524.1	COP9 signalosome complex subunit 2 isoform X3 [Lactuca sativa]		COP9 signalosome complex subunit 2 isoform X3 [Lactuca sativa]	N-Term(Acetyl); S2(Phospho); Y9(Phospho); K33(iTRAQ8plex)	0	S(2): 100.0; Y(9): 33.3; Y(13): 33.3; S(14): 33.3; Y(29): 0.1; Y(30): 0.0; S(32): 0.0	125.361	47.94	3	0.001018	4430.68	-0.0852338	0.988661	0.971621	0.567733	0.842672	1.10213	1.14215	1.22989	1.15806	0.727661	0.0915157
tDDLVDNPSssssPPtPPAEAPPVPTk	1	XP_023760836.1	uncharacterized protein LOC111909280 [Lactuca sativa]		uncharacterized protein LOC111909280 [Lactuca sativa]	N-Term(iTRAQ8plex); S10(Phospho); S11(Phospho); S12(Phospho); S13(Phospho); T16(Phospho); K27(iTRAQ8plex)	0	T(1): 0.0; S(9): 69.4; S(10): 69.4; S(11): 69.4; S(12): 96.1; S(13): 96.1; T(16): 99.4; T(26): 0.1	69.6276	9.98	3	11.7138	3711.54	0.268793	0.996204	1.13124	1.15771	1.09505	0.827093	0.84827	1.04449	0.906616	1.20784	0.0919428
aSGEDsEVENsDIELDDDLGTGDSSYk	2	PLY79050.1	hypothetical protein LSAT_3X6620 [Lactuca sativa]		hypothetical protein LSAT_3X6620 [Lactuca sativa]	N-Term(iTRAQ8plex); S6(Phospho); S11(Phospho); K27(iTRAQ8plex)	0	S(2): 91.6; S(6): 9.3; S(11): 98.2; T(21): 0.9; S(24): 0.0; S(25): 0.0; Y(26): 0.0	73.7658	5.86	3	30.4686	3615.52	-2.26877	0.950726	0.943506	0.915204	0.936479	1.18808	1.05575	0.977958	1.07393	0.872012	0.0919546
lVDVGEIPEYILssEEEQEVSAR	39	PLY77529.1	hypothetical protein LSAT_2X86661 [Lactuca sativa]		hypothetical protein LSAT_2X86661 [Lactuca sativa]	N-Term(iTRAQ8plex); S13(Phospho); S14(Phospho)	0	Y(10): 0.0; S(13): 100.0; S(14): 100.0; S(21): 0.0	445.349	95.04	2	6.3731e-08	3055.41	1.20664	1.01521	1.04549	0.988888	1.01653	0.938702	0.991644	0.970667	0.967004	1.05121	0.0921093
qEsYDsGDIR	3	XP_023753572.1	zinc finger CCCH domain-containing protein 38-like [Lactuca sativa]		zinc finger CCCH domain-containing protein 38-like [Lactuca sativa]	N-Term(iTRAQ8plex); S3(Phospho); S6(Phospho)	0	S(3): 100.0; Y(4): 0.0; S(6): 100.0	239.372	26.93	2	0.0326457	1633.64	-0.994804	1.04384	1.00532	1.07676	1.04197	1.02178	0.925901	0.933243	0.960307	1.08504	0.0924407
eGNLSSDIVSDs	7	XP_023756227.1	probable inactive receptor kinase RLK902 [Lactuca sativa]		probable inactive receptor kinase RLK902 [Lactuca sativa]	N-Term(iTRAQ8plex); S12(Phospho)	0	S(5): 0.0; S(6): 0.0; S(10): 1.7; S(12): 98.3	188.436	62.12	2	2.6269e-05	1606.72	0.850158	1.07242	1.00964	1.10376	1.06194	0.865246	1.02322	0.945456	0.944641	1.12417	0.0927623
fYMEPDtSDSGSmISGAAGGR	1	XP_023739101.1	protein argonaute 1-like [Lactuca sativa]		protein argonaute 1-like [Lactuca sativa]	N-Term(iTRAQ8plex); T7(Phospho); M13(Oxidation)	0	Y(2): 1.8; T(7): 24.5; S(8): 24.5; S(10): 24.5; S(12): 24.5; S(15): 0.0	79.8578	2.52	3	43.6891	2536.07	-0.468416	0.799864	0.962939	0.974138	0.912314	1.06483	1.00763	1.21375	1.0954	0.832857	0.092982
mAQDEHTSRcSNSSSGGGGGGGGGGGGGGGGGGGSsHRSSk	1	XP_023771331.1	probable serine/threonine-protein kinase DDB_G0272282 [Lactuca sativa]		probable serine/threonine-protein kinase DDB_G0272282 [Lactuca sativa]	N-Term(iTRAQ8plex); M1(Oxidation); C10(Carbamidomethyl); S36(Phospho); K41(iTRAQ8plex)	2	T(7): 4.0; S(8): 4.0; S(11): 0.2; S(13): 0.0; S(14): 0.0; S(15): 0.0; S(35): 4.0; S(36): 83.4; S(39): 4.0; S(40): 0.2	98.0344	3.38	5	65.9868	4253.77	-13.2246	0.772025	0.896758	1.01834	0.895707	1.06438	1.02582	1.25229	1.11416	0.803928	0.0936872
lGLTAASPAPVAPPsPssSNVSVR	3	PLY67039.1	hypothetical protein LSAT_5X148881 [Lactuca sativa]		hypothetical protein LSAT_5X148881 [Lactuca sativa]	N-Term(iTRAQ8plex); S15(Phospho); S17(Phospho); S18(Phospho)	0	T(4): 0.0; S(7): 0.0; S(15): 60.0; S(17): 60.0; S(18): 60.0; S(19): 60.0; S(22): 60.0	93.1857	0.33	3	164.327	2806.33	5.51083	1.05443	0.803633	0.83701	0.898359	1.2193	1.02383	1.09113	1.11142	0.808299	0.0937533
iVsPNPsPDAALTGSmR	2	PLY71261.1	hypothetical protein LSAT_5X81060 [Lactuca sativa]		hypothetical protein LSAT_5X81060 [Lactuca sativa]	N-Term(iTRAQ8plex); S3(Phospho); S7(Phospho); M16(Oxidation)	0	S(3): 100.0; S(7): 100.0; T(13): 0.0; S(15): 0.0	170.442	21.2	3	0.664135	2193	0.857262	1.01484	1.05113	1.03822	1.03473	1.01864	0.916474	0.963028	0.966046	1.0711	0.0938346
mDsGEssDESPVVTk	5	PLY94848.1	hypothetical protein LSAT_2X101121 [Lactuca sativa]		hypothetical protein LSAT_2X101121 [Lactuca sativa]	M1(Oxidation); N-Term(Acetyl); S3(Phospho); S6(Phospho); S7(Phospho); K15(iTRAQ8plex)	0	S(3): 100.0; S(6): 99.8; S(7): 95.3; S(10): 5.0; T(14): 0.0	157.294	39.23	2	0.00208948	2169.8	3.03144	1.06763	1.09259	1.00341	1.05454	0.907742	1.02841	0.928503	0.954884	1.10437	0.0949072
aPsFSGPLNLPNR	11	XP_023770281.1	serine/threonine-protein kinase BLUS1-like [Lactuca sativa]		serine/threonine-protein kinase BLUS1-like [Lactuca sativa]	N-Term(iTRAQ8plex); S3(Phospho)	0	S(3): 99.9; S(5): 0.1	128.297	19.83	2	1.09452	1753.89	-1.08037	0.96998	1.00865	0.893015	0.957215	1.1217	1.01133	1.04585	1.05963	0.90335	0.0952973
lGIWEYGDIQsDDDENQNPLPSSVk	2	XP_023748465.1	ribonuclease TUDOR 2-like [Lactuca sativa]		ribonuclease TUDOR 2-like [Lactuca sativa]	N-Term(iTRAQ8plex); S11(Phospho); K25(iTRAQ8plex)	0	Y(6): 3.2; S(11): 96.8; S(22): 0.0; S(23): 0.0	145.277	16.3	3	5.99185	3507.67	-0.824599	0.951691	0.957011	0.95519	0.95463	0.989843	1.13938	1.02758	1.05227	0.907211	0.0954497
lHRsDsssssssDEEcDENGEk	2	XP_023737908.1	dehydrin ERD14-like [Lactuca sativa]		dehydrin ERD14-like [Lactuca sativa]	N-Term(iTRAQ8plex); S4(Phospho); S6(Phospho); S7(Phospho); S8(Phospho); S9(Phospho); S10(Phospho); S11(Phospho); S12(Phospho); C16(Carbamidomethyl); K22(iTRAQ8plex)	1	S(4): 100.0; S(6): 100.0; S(7): 100.0; S(8): 100.0; S(9): 100.0; S(10): 100.0; S(11): 100.0; S(12): 100.0	257.838	6.99	3	13.939	3690.11	1.45009	1.07383	0.999508	1.012	1.02845	0.991714	0.973705	0.955776	0.973732	1.05619	0.0957721
aEDMGGLPEEQssDEELtEDEYDSGDDDmAAGPVDP	3	XP_023730819.1	ubiquitin-conjugating enzyme E2-23 kDa-like isoform X1 [Lactuca sativa]		ubiquitin-conjugating enzyme E2-23 kDa-like isoform X1 [Lactuca sativa]	N-Term(iTRAQ8plex); S12(Phospho); S13(Phospho); T18(Phospho); M29(Oxidation)	0	S(12): 95.4; S(13): 95.4; T(18): 36.4; Y(22): 36.4; S(24): 36.4	129.774	9.56	3	6.25242	4375.5	-15.6822	0.874579	0.984155	0.612795	0.823843	1.36599	0.950632	1.22485	1.18049	0.697883	0.0957781
eVQAFGPVDAATsS	15	XP_023766691.1	cysteine proteinase inhibitor A-like [Lactuca sativa]		cysteine proteinase inhibitor A-like [Lactuca sativa]	N-Term(iTRAQ8plex); S13(Phospho)	0	T(12): 0.0; S(13): 50.0; S(14): 50.0	218.49	69.8	2	7.53409e-06	1762.82	1.44042	1.02305	1.00376	0.988597	1.00513	0.967042	0.994315	0.959617	0.973658	1.03233	0.0959455
ySLDDsDDESDILLGk	3	XP_023761490.1	CHD3-type chromatin-remodeling factor PICKLE isoform X2 [Lactuca sativa]		CHD3-type chromatin-remodeling factor PICKLE isoform X2 [Lactuca sativa]	N-Term(iTRAQ8plex); S6(Phospho); K16(iTRAQ8plex)	0	Y(1): 0.0; S(2): 0.0; S(6): 100.0; S(10): 0.0	202.852	33.19	3	0.0735911	2473.18	-1.58429	0.936353	0.902574	1.00746	0.948796	0.988938	1.05656	1.12301	1.05617	0.898337	0.096054
sGREDsDsDAPEEFTAEQAIQk	2	XP_023770354.1	uncharacterized protein LOC111918975 [Lactuca sativa]		uncharacterized protein LOC111918975 [Lactuca sativa]	N-Term(Acetyl); S1(Phospho); S6(Phospho); S8(Phospho); K22(iTRAQ8plex)	1	S(1): 100.0; S(6): 100.0; S(8): 100.0; T(15): 0.0	207.353	27.36	3	0.104499	2996.17	-2.81388	0.968796	1.00779	0.870094	0.948893	1.00505	1.09417	1.06326	1.05416	0.900143	0.0962239
eAEPVVDTPPPAtPEVVAEEPk	2	XP_023742797.1	major latex allergen Hev b 5-like [Lactuca sativa]		major latex allergen Hev b 5-like [Lactuca sativa]	N-Term(iTRAQ8plex); T13(Phospho); K22(iTRAQ8plex)	0	T(8): 5.1; T(13): 94.9	58.7068	12.24	2	13.0631	2989.51	-5.36627	0.861393	0.807681	0.94757	0.872215	1.03987	0.990202	1.33638	1.12215	0.77727	0.0964484
fYMEPDtsDsGsMISGAAGGR	5	XP_023739101.1	protein argonaute 1-like [Lactuca sativa]		protein argonaute 1-like [Lactuca sativa]	N-Term(iTRAQ8plex); T7(Phospho); S8(Phospho); S10(Phospho); S12(Phospho)	0	Y(2): 0.0; T(7): 100.0; S(8): 100.0; S(10): 100.0; S(12): 100.0; S(15): 0.0	217.93	57.3	2	3.4821e-05	2759.98	3.03726	0.923686	0.87628	1.0232	0.941054	1.10273	1.01283	1.03722	1.05093	0.895452	0.0972056
aNAESLssEEEEEEEsDEETIGAVk	8	XP_023753735.1	STOREKEEPER protein-like [Lactuca sativa]		STOREKEEPER protein-like [Lactuca sativa]	N-Term(iTRAQ8plex); S7(Phospho); S8(Phospho); S16(Phospho); K25(iTRAQ8plex)	0	S(5): 4.8; S(7): 95.5; S(8): 99.8; S(16): 99.8; T(20): 0.2	284.271	75.63	3	2.69287e-06	3559.46	-0.0680655	0.959204	0.941674	0.906557	0.935812	1.06953	0.948287	1.07742	1.03175	0.907018	0.0976914
sDEGEk	1	PLY71232.1	hypothetical protein LSAT_6X14400 [Lactuca sativa]		hypothetical protein LSAT_6X14400 [Lactuca sativa]	N-Term(Acetyl); S1(Phospho); K6(iTRAQ8plex)	0	S(1): 100.0	161.914	31.13	2	0.00655268	1090.46	2.82028	0.814528	0.765058	0.988586	0.856057	1.37782	1.17834	0.939584	1.16525	0.734657	0.097757
tLSDtPPAsPAGSTPPVSPFAGSEAFR	1	XP_023751833.1	dormancy-associated protein homolog 3-like isoform X1 [Lactuca sativa]		dormancy-associated protein homolog 3-like isoform X1 [Lactuca sativa]	N-Term(iTRAQ8plex); T5(Phospho); S9(Phospho)	0	T(1): 0.3; S(3): 5.0; T(5): 94.8; S(9): 100.0; S(13): 0.0; T(14): 0.0; S(18): 0.0; S(23): 0.0	205.548	29.31	3	0.214336	3108.43	0.668838	0.907145	0.842266	1.03635	0.928588	1.16225	1.00755	1.0831	1.0843	0.856395	0.0980572
fmVESPAIITAtP	3	XP_023752110.1	stem-specific protein TSJT1 [Lactuca sativa]		stem-specific protein TSJT1 [Lactuca sativa]	N-Term(iTRAQ8plex); M2(Oxidation); T12(Phospho)	0	S(5): 0.0; T(10): 0.0; T(12): 100.0	176.888	25.14	2	0.315382	1776.88	-1.72369	0.959302	0.963064	0.898793	0.940386	0.970804	1.15719	1.06415	1.06405	0.883783	0.0987092
eYNsLSPGTsPR	2	PLY92721.1	hypothetical protein LSAT_7X4721 [Lactuca sativa]		hypothetical protein LSAT_7X4721 [Lactuca sativa]	N-Term(iTRAQ8plex); S4(Phospho); S10(Phospho)	0	Y(2): 3.5; S(4): 3.5; S(6): 93.0; T(9): 50.0; S(10): 50.0	112.386	9.24	2	4.53863	1771.76	-2.55802	1.04732	1.14112	1.06901	1.08582	1.04821	0.793764	0.911339	0.917772	1.18311	0.099915
sVVsPVksPMVESLk	1	XP_023736552.1	ENHANCER OF AG-4 protein 2 [Lactuca sativa]		ENHANCER OF AG-4 protein 2 [Lactuca sativa]	N-Term(iTRAQ8plex); S4(Phospho); K7(iTRAQ8plex); S8(Phospho); K15(iTRAQ8plex)	1	S(1): 0.0; S(4): 100.0; S(8): 100.0; S(13): 0.0	90.0255	10.98	3	13.6657	2659.43	-0.103048	1.09386	1.14715	0.993702	1.07824	1.01748	0.819785	0.932049	0.923106	1.16805	0.100112
sSsSsPPTAVPLPYR	7	XP_023741312.1	trihelix transcription factor ASIL2-like [Lactuca sativa]		trihelix transcription factor ASIL2-like [Lactuca sativa]	N-Term(iTRAQ8plex); S3(Phospho); S5(Phospho)	0	S(1): 0.1; S(2): 2.7; S(3): 97.1; S(4): 2.8; S(5): 97.3; T(8): 0.0; Y(14): 0.0	175.216	16.43	2	1.84965	2009.91	-7.32031	1.03792	1.0207	1.0578	1.03881	0.918488	1.02776	0.95291	0.966386	1.07494	0.100141
iVEIQGsPDHGALLMk	2	XP_023762435.1	BAG family molecular chaperone regulator 7 [Lactuca sativa]		BAG family molecular chaperone regulator 7 [Lactuca sativa]	N-Term(iTRAQ8plex); S7(Phospho); K16(iTRAQ8plex)	0	S(7): 100.0	213.836	21.51	3	1.18661	2396.29	1.45105	0.936198	0.920957	0.880525	0.91256	1.03038	0.988562	1.25231	1.09042	0.83689	0.100232
lHDEAYGNVssDssDEDFsDSEGPk	1	XP_023771901.1	pathogenesis-related homeodomain protein [Lactuca sativa]		pathogenesis-related homeodomain protein [Lactuca sativa]	N-Term(iTRAQ8plex); S10(Phospho); S11(Phospho); S13(Phospho); S14(Phospho); S19(Phospho); K25(iTRAQ8plex)	0	Y(6): 0.0; S(10): 76.1; S(11): 76.1; S(13): 76.1; S(14): 76.1; S(19): 97.9; S(21): 97.9	95.7421	29.76	3	0.0303307	3695.31	-3.89414	0.904354	1.01145	0.927321	0.947709	1.14427	1.03017	1.00783	1.06076	0.893429	0.101412
tSGFSYsPDsGDSYTVENLAR	6	PLY90420.1	hypothetical protein LSAT_8X133220 [Lactuca sativa]		hypothetical protein LSAT_8X133220 [Lactuca sativa]	N-Term(iTRAQ8plex); S7(Phospho); S10(Phospho)	0	T(1): 0.0; S(2): 0.0; S(5): 1.6; Y(6): 49.2; S(7): 49.2; S(10): 99.9; S(13): 0.0; Y(14): 0.0; T(15): 0.1	166.453	25.58	2	0.2143	2717.14	2.27152	1.06527	1.00866	0.992147	1.02202	0.97301	0.921652	0.984635	0.959765	1.06487	0.101653
tDEIssEETTESk	2	XP_023735176.1	titin isoform X2 [Lactuca sativa]		titin isoform X2 [Lactuca sativa]	N-Term(iTRAQ8plex); S5(Phospho); S6(Phospho); K13(iTRAQ8plex)	0	T(1): 0.3; S(5): 99.8; S(6): 99.8; T(9): 0.0; T(10): 0.0; S(12): 0.0	117.235	9.43	3	8.19269	2223.97	-1.02649	1.15751	1.00401	1.02689	1.0628	0.9898	0.861655	0.949722	0.933726	1.13824	0.101706
lLMAAAGSSPNFPFPNsPk	1	XP_023763504.1	zinc finger CCCH domain-containing protein 53-like [Lactuca sativa]		zinc finger CCCH domain-containing protein 53-like [Lactuca sativa]	N-Term(iTRAQ8plex); S17(Phospho); K19(iTRAQ8plex)	0	S(8): 0.0; S(9): 0.0; S(17): 100.0	128.388	14.29	3	7.36032	2634.36	-1.86229	1.0951	1.03656	1.03162	1.05443	0.858029	1.00138	0.987002	0.948803	1.11132	0.101854
fYmEPDTsDsGSMISGAAGGR	19	XP_023739101.1	protein argonaute 1-like [Lactuca sativa]		protein argonaute 1-like [Lactuca sativa]	N-Term(iTRAQ8plex); M3(Oxidation); S8(Phospho); S10(Phospho)	0	Y(2): 0.0; T(7): 51.6; S(8): 51.6; S(10): 96.4; S(12): 0.5; S(15): 0.0	153.223	59.34	3	5.90212e-05	2616.05	5.4401	0.963425	0.912219	0.988503	0.954716	1.07638	1.00262	0.999064	1.02602	0.930501	0.102152
fSGLLsSSGsPR	14	XP_023771928.1	autophagy-related protein 13a [Lactuca sativa]		autophagy-related protein 13a [Lactuca sativa]	N-Term(iTRAQ8plex); S6(Phospho); S10(Phospho)	0	S(2): 0.0; S(6): 99.9; S(7): 0.1; S(8): 2.6; S(10): 97.4	210.375	24.57	2	0.17876	1658.74	-2.99681	1.0366	1.03768	1.02352	1.0326	1.00371	0.962417	1.01974	0.995288	1.03749	0.102286
fFSAsVPGsR	2	PLY89670.1;XP_023770744.1	hypothetical protein LSAT_3X110861 [Lactuca sativa]		hypothetical protein LSAT_3X110861 [Lactuca sativa]	N-Term(iTRAQ8plex); S5(Phospho); S9(Phospho)	0	S(3): 0.0; S(5): 100.0; S(9): 100.0	150.257	11.16	2	2.74466	1518.66	-4.07829	1.01286	1.01959	1.09864	1.0437	0.953223	0.914549	1.01264	0.960137	1.08703	0.102784
yASDDDGssGDDGMLYLPDLEk	6	XP_023766366.1	uncharacterized protein At3g03773 isoform X2 [Lactuca sativa]		uncharacterized protein At3g03773 isoform X2 [Lactuca sativa]	N-Term(iTRAQ8plex); Y1(Phospho); S8(Phospho); S9(Phospho); K22(iTRAQ8plex)	0	Y(1): 0.4; S(3): 99.6; S(8): 100.0; S(9): 100.0; Y(16): 0.0	126.279	18.35	3	0.989894	3211.3	-0.177709	1.01587	0.951545	0.913151	0.960189	1.07302	1.07175	0.991101	1.04529	0.918587	0.102904
vVNSPVsPAsGSAsVEENVNPGMR	14	XP_023767540.1	protein WVD2-like 2 [Lactuca sativa]		protein WVD2-like 2 [Lactuca sativa]	N-Term(iTRAQ8plex); S7(Phospho); S10(Phospho); S14(Phospho)	0	S(4): 0.0; S(7): 100.0; S(10): 96.6; S(12): 6.8; S(14): 96.6	279.754	58.57	3	0.000170756	2928.26	1.01553	0.932284	0.925165	0.972601	0.94335	0.966807	1.1271	1.043	1.04563	0.902179	0.103067
gAPEDDEDEYMsDEDDFYDR	1	PLY87303.1	hypothetical protein LSAT_3X95261 [Lactuca sativa]		hypothetical protein LSAT_3X95261 [Lactuca sativa]	N-Term(iTRAQ8plex); S12(Phospho)	0	Y(10): 4.7; S(12): 95.0; Y(18): 0.3	105.019	1.93	3	17.8256	2797.02	-3.92525	1.02997	0.896141	0.906655	0.944256	1.03349	1.0191	1.1327	1.06176	0.889328	0.103265
sGAEDE	2	XP_023765200.1	14-3-3 protein 9-like [Lactuca sativa]		14-3-3 protein 9-like [Lactuca sativa]	N-Term(iTRAQ8plex); S1(Phospho)	0	S(1): 100.0	143.977	37.09	2	0.00040064	991.392	-0.53568	0.856315	0.821241	0.87554	0.851032	1.36194	1.23501	0.876601	1.15785	0.735011	0.103792
dSSVEAWGGEIPsFk	1	XP_023771061.1	phosphoinositide phospholipase C 2-like [Lactuca sativa]		phosphoinositide phospholipase C 2-like [Lactuca sativa]	N-Term(iTRAQ8plex); S13(Phospho); K15(iTRAQ8plex)	0	S(2): 0.0; S(3): 0.0; S(13): 100.0	148.378	21.68	3	0.896888	2297.12	-3.43829	0.998054	1.00053	0.887535	0.962039	1.03427	1.03207	1.06203	1.04279	0.922564	0.103872
tPQQDDTHTPsPDGAPtTPQPGIFGTITk	2	XP_023754731.1	phosphatidylinositol 3,4,5-trisphosphate 3-phosphatase and protein-tyrosine-phosphatase PTEN2A [Lactuca sativa]		phosphatidylinositol 3,4,5-trisphosphate 3-phosphatase and protein-tyrosine-phosphatase PTEN2A [Lactuca sativa]	N-Term(iTRAQ8plex); S11(Phospho); T17(Phospho); K29(iTRAQ8plex)	0	T(1): 0.0; T(7): 0.1; T(9): 1.1; S(11): 95.2; T(17): 51.8; T(18): 51.8; T(26): 0.0; T(28): 0.0	109.094	10.18	4	25.333	3773.79	0.372704	0.893229	0.917685	0.984046	0.931653	1.15418	0.950021	1.12905	1.07775	0.864444	0.104349
aGGITSLVsPcPVtPAVLPtPIFSPSR	1	XP_023739756.1	metabotropic glutamate receptor-like protein P [Lactuca sativa]		metabotropic glutamate receptor-like protein P [Lactuca sativa]	N-Term(iTRAQ8plex); S9(Phospho); C11(Carbamidomethyl); T14(Phospho); T20(Phospho)	0	T(5): 3.4; S(6): 96.5; S(9): 0.1; T(14): 100.0; T(20): 0.0; S(24): 50.0; S(26): 50.0	255.684	34.24	3	0.0909175	3265.57	0.203608	1.02097	1.11493	0.99402	1.0433	0.980651	0.969806	0.931312	0.96059	1.08611	0.104886
nYPDLcSQENGsPTTQLEATTR	4	XP_023741439.1	tRNA pseudouridine synthase 1-like isoform X2 [Lactuca sativa]		tRNA pseudouridine synthase 1-like isoform X2 [Lactuca sativa]	N-Term(iTRAQ8plex); C6(Carbamidomethyl); S12(Phospho)	0	Y(2): 0.0; S(7): 3.7; S(12): 96.0; T(14): 0.2; T(15): 0.2; T(20): 0.0; T(21): 0.0	135.682	19.39	3	1.44023	2866.27	-5.62446	1.01118	0.951583	0.962453	0.97507	1.0637	1.03615	0.995033	1.03163	0.945177	0.105086
fSGESIIPVGsYNPSEFASPSVADFFEDk	1	XP_023773282.1	translation initiation factor eIF-2B subunit delta isoform X1 [Lactuca sativa]		translation initiation factor eIF-2B subunit delta isoform X1 [Lactuca sativa]	N-Term(iTRAQ8plex); S11(Phospho); K29(iTRAQ8plex)	0	S(2): 0.0; S(5): 0.0; S(11): 90.4; Y(12): 3.2; S(15): 3.2; S(19): 3.2; S(21): 0.1	132.064	31.35	3	0.210284	3811.82	-0.979745	1.12829	1.05361	1.01677	1.06622	0.84778	0.92257	1.03329	0.934547	1.1409	0.10516
aELsPRtDTstDGDTEDk	2	XP_023740580.1	transcription factor HBP-1b(c38)-like [Lactuca sativa]		transcription factor HBP-1b(c38)-like [Lactuca sativa]	N-Term(Acetyl); S4(Phospho); T7(Phospho); S10(Phospho); T11(Phospho); K18(iTRAQ8plex)	1	S(4): 78.7; T(7): 78.7; T(9): 78.7; S(10): 78.7; T(11): 78.7; T(15): 6.7	38.1832	0.54	3	14.2617	2603.93	-4.26665	1.00892	0.871106	0.918421	0.932815	1.1816	0.99033	1.05854	1.07682	0.866266	0.10533
mHGsDDDsDIDVR	16	XP_023730179.1	ABC transporter F family member 4-like [Lactuca sativa]		ABC transporter F family member 4-like [Lactuca sativa]	N-Term(iTRAQ8plex); S4(Phospho); S8(Phospho)	0	S(4): 100.0; S(8): 100.0	315.243	45.85	2	0.000404325	1925.73	-1.19906	0.968053	0.986234	0.989595	0.981294	1.0364	0.999592	0.997414	1.01113	0.970488	0.105365
eGNLssDIVsDS	6	XP_023756227.1	probable inactive receptor kinase RLK902 [Lactuca sativa]		probable inactive receptor kinase RLK902 [Lactuca sativa]	N-Term(iTRAQ8plex); S5(Phospho); S6(Phospho); S10(Phospho)	0	S(5): 100.0; S(6): 100.0; S(10): 96.0; S(12): 4.0	167.569	26.84	2	0.0210119	1766.64	-2.08516	1.06708	1.08125	1.03102	1.05978	0.89116	1.04649	0.832264	0.923304	1.14782	0.106051
vVYIPANPPsPVPEESEEGSsPR	36	XP_023733538.1	vesicle-associated protein 1-3 [Lactuca sativa]		vesicle-associated protein 1-3 [Lactuca sativa]	N-Term(iTRAQ8plex); S10(Phospho); S21(Phospho)	0	Y(3): 0.0; S(10): 100.0; S(16): 0.1; S(20): 2.8; S(21): 97.1	303.144	45.51	2	0.00465088	2901.33	1.9941	1.05124	0.992097	1.05696	1.03343	1.00744	0.971505	0.927094	0.968679	1.06685	0.106107
sFSEMsITMsPPR	3	XP_023740638.1	probable alkaline/neutral invertase D [Lactuca sativa]		probable alkaline/neutral invertase D [Lactuca sativa]	N-Term(iTRAQ8plex); S6(Phospho); S10(Phospho)	0	S(1): 2.3; S(3): 95.3; S(6): 2.3; T(8): 50.0; S(10): 50.0	143.75	4.31	2	15.1608	1933.81	-3.48975	0.964268	0.968359	1.01357	0.982065	1.02702	1.00047	1.03998	1.02249	0.960467	0.108359
nDTALLTLEDGGsPVR	7	XP_023763087.1	kinesin-like protein KIN-14B [Lactuca sativa]		kinesin-like protein KIN-14B [Lactuca sativa]	N-Term(iTRAQ8plex); S13(Phospho)	0	T(3): 0.0; T(7): 0.0; S(13): 100.0	170.652	38.37	3	0.0157845	2042.01	-1.66053	1.10259	1.00716	1.01164	1.04046	0.935618	1.00702	0.938404	0.960346	1.08342	0.108396
smVDEPLYPIAVLIDELk	2	XP_023746220.1	serine/threonine-protein phosphatase 2A 65 kDa regulatory subunit A beta isoform [Lactuca sativa]		serine/threonine-protein phosphatase 2A 65 kDa regulatory subunit A beta isoform [Lactuca sativa]	N-Term(Acetyl); S1(Phospho); M2(Oxidation); K18(iTRAQ8plex)	0	S(1): 100.0; Y(8): 0.0	183.754	72.64	2	9.5288e-06	2487.26	-1.70334	0.9838	1.06951	1.19424	1.08252	0.890498	0.819665	1.01817	0.909445	1.19031	0.109304
sSANNLNELDsQNVDVPSSIPVFPSTGDk	1	XP_023737018.1	probable LIM domain-containing serine/threonine-protein kinase DDB_G0287001 [Lactuca sativa]		probable LIM domain-containing serine/threonine-protein kinase DDB_G0287001 [Lactuca sativa]	N-Term(iTRAQ8plex); S11(Phospho); K29(iTRAQ8plex)	0	S(1): 50.0; S(2): 50.0; S(11): 0.0; S(18): 0.0; S(19): 0.0; S(25): 0.0; T(26): 0.0	100.416	32.53	3	0.159108	3719.82	-1.24573	0.943567	1.11882	1.13603	1.06614	0.946983	0.937885	0.934943	0.939937	1.13427	0.109823
mDHssGEEsDFsESEIAEYk	13	XP_023761778.1	factor of DNA methylation 1-like [Lactuca sativa]		factor of DNA methylation 1-like [Lactuca sativa]	N-Term(Acetyl); S4(Phospho); S5(Phospho); S9(Phospho); S12(Phospho); K20(iTRAQ8plex)	0	S(4): 100.0; S(5): 100.0; S(9): 100.0; S(12): 96.3; S(14): 3.7; Y(19): 0.0	225.212	26.22	2	0.0268629	2943	0.16603	0.942191	1.00578	0.877303	0.941757	1.08233	1.05727	0.980724	1.04011	0.905442	0.110118
dSGNSLQSssDIsDDEGLGk	1	XP_023772378.1	phototropin-1 isoform X2 [Lactuca sativa]		phototropin-1 isoform X2 [Lactuca sativa]	N-Term(iTRAQ8plex); S9(Phospho); S10(Phospho); S13(Phospho); K20(iTRAQ8plex)	0	S(2): 0.0; S(5): 0.0; S(8): 97.2; S(9): 51.4; S(10): 51.4; S(13): 100.0	128.518	19.33	3	0.882108	2859.18	-1.2072	0.976258	1.09644	1.11821	1.06364	0.991862	0.862647	0.970648	0.941719	1.12946	0.110121
yALVsDDEksNDDDEAk	5	XP_023730179.1	ABC transporter F family member 4-like [Lactuca sativa]		ABC transporter F family member 4-like [Lactuca sativa]	N-Term(iTRAQ8plex); S5(Phospho); K9(iTRAQ8plex); S10(Phospho); K17(iTRAQ8plex)	1	Y(1): 0.0; S(5): 100.0; S(10): 100.0	177.103	17.3	3	2.98958	2986.37	-1.73891	0.931032	0.996329	0.919907	0.949089	1.15726	0.996321	1.02859	1.06073	0.894755	0.110525
gLENLDVAYsPGGR	4	XP_023768204.1	probable alkaline/neutral invertase D [Lactuca sativa]		probable alkaline/neutral invertase D [Lactuca sativa]	N-Term(iTRAQ8plex); S10(Phospho)	0	Y(9): 1.9; S(10): 98.1	231.408	21.93	2	0.675835	1831.88	-3.13873	0.993321	1.01722	1.07621	1.02892	0.982542	0.985334	0.960682	0.976186	1.05402	0.110809
vGSGSANVGVPGGVsSPR	2	XP_023737416.1	proteoglycan 4-like [Lactuca sativa]		proteoglycan 4-like [Lactuca sativa]	N-Term(iTRAQ8plex); S15(Phospho)	0	S(3): 0.0; S(5): 0.0; S(15): 50.0; S(16): 50.0	111.81	7.93	2	20.1653	1967.98	-0.368682	0.961634	1.0881	1.20461	1.08478	0.99446	0.869812	0.90511	0.923127	1.17512	0.111335
aASGMssDER	1	XP_023735623.1	rRNA-processing protein efg1 [Lactuca sativa]		rRNA-processing protein efg1 [Lactuca sativa]	N-Term(iTRAQ8plex); S6(Phospho); S7(Phospho)	0	S(3): 0.3; S(6): 99.9; S(7): 99.9	119.678	12.62	2	0.670095	1474.55	-2.6965	0.955774	0.88598	0.951224	0.930993	1.22046	1.0049	1.01655	1.08064	0.861522	0.111576
aTGFSAPIIPSQSPDSAPAYNsVPPPVDEIELAk	19	XP_023757573.1	far upstream element-binding protein 2 [Lactuca sativa]		far upstream element-binding protein 2 [Lactuca sativa]	N-Term(iTRAQ8plex); S22(Phospho); K34(iTRAQ8plex)	0	T(2): 0.0; S(5): 0.0; S(11): 0.3; S(13): 0.3; S(16): 0.3; Y(20): 5.3; S(22): 93.8	157.602	30.52	4	0.2276	4154.13	3.20957	0.914613	0.95413	0.933076	0.93394	1.16316	0.943287	1.10037	1.06894	0.873708	0.111727
iLVSNLsGIFQR	11	XP_023739997.1	WEB family protein At5g55860 [Lactuca sativa]		WEB family protein At5g55860 [Lactuca sativa]	N-Term(iTRAQ8plex); S7(Phospho)	0	S(4): 0.0; S(7): 100.0	275.393	35.42	2	0.0270571	1730.95	-0.540512	1.0134	1.12229	1.01525	1.05032	0.913053	0.92371	1.01693	0.951231	1.10416	0.112289
sEsSVsNNsDDEAHQYWR	10	XP_023744993.1	polyadenylate-binding protein-interacting protein 7-like [Lactuca sativa]		polyadenylate-binding protein-interacting protein 7-like [Lactuca sativa]	N-Term(iTRAQ8plex); S3(Phospho); S6(Phospho); S9(Phospho)	0	S(1): 5.7; S(3): 91.8; S(4): 51.3; S(6): 51.3; S(9): 100.0; Y(16): 0.0	136.815	11.76	3	1.66702	2654.97	-0.252912	0.99999	0.98478	0.975266	0.986679	1.03545	1.06706	0.993731	1.03208	0.956009	0.11287
aDADsDDESVR	1	XP_023744933.1	DNA topoisomerase 6 subunit A [Lactuca sativa]		DNA topoisomerase 6 subunit A [Lactuca sativa]	N-Term(iTRAQ8plex); S5(Phospho)	0	S(5): 100.0; S(9): 0.0	147.755	7.62	2	3.61532	1563.65	0.143586	1.02471	0.905271	0.903658	0.944548	1.03885	1.00328	1.1412	1.06111	0.890151	0.112962
aALVVVVPEsPEsDGGGGGGGGVEEDAMYsPR	34	PLY63977.1	hypothetical protein LSAT_4X182821 [Lactuca sativa]		hypothetical protein LSAT_4X182821 [Lactuca sativa]	N-Term(iTRAQ8plex); S10(Phospho); S13(Phospho); S30(Phospho)	0	S(10): 100.0; S(13): 100.0; Y(29): 0.1; S(30): 99.9	475.076	94.16	3	5.10331e-08	3589.51	-0.752194	1.01194	0.986006	0.990859	0.996269	1.00249	1.03243	1.0285	1.02114	0.975643	0.113501
lVSELFSsASD	9	PLY89459.1	hypothetical protein LSAT_8X21800 [Lactuca sativa]		hypothetical protein LSAT_8X21800 [Lactuca sativa]	N-Term(iTRAQ8plex); S8(Phospho)	0	S(3): 0.0; S(7): 0.0; S(8): 1.8; S(10): 98.2	181.47	46.48	2	0.00144164	1538.73	-2.06696	1.00705	1.02226	1.0259	1.01841	0.961666	0.968869	1.01589	0.982141	1.03692	0.113533
kILEDsDNEsDDDFVISR	1	XP_023765814.1	FK506-binding protein 4 [Lactuca sativa]		FK506-binding protein 4 [Lactuca sativa]	K1(iTRAQ8plex); N-Term(iTRAQ8plex); S6(Phospho); S10(Phospho)	1	S(6): 100.0; S(10): 100.0; S(17): 0.0	90.5156	2.26	3	84.4489	2865.3	-1.00162	0.932424	0.975631	0.966212	0.958089	1.00941	1.00098	1.13292	1.04777	0.914407	0.114791
fYMEPDtsDsGSMISGAAGGR	20	XP_023739101.1	protein argonaute 1-like [Lactuca sativa]		protein argonaute 1-like [Lactuca sativa]	N-Term(iTRAQ8plex); T7(Phospho); S8(Phospho); S10(Phospho)	0	Y(2): 0.0; T(7): 100.0; S(8): 100.0; S(10): 99.9; S(12): 0.1; S(15): 0.0	325.295	77.24	2	5.80557e-07	2680.01	1.40541	0.990348	0.986496	0.95874	0.978528	1.00171	1.0433	0.997244	1.01408	0.964938	0.115323
aSGtATSDVTDGPVLTLINk	8	XP_023730104.1	uncharacterized protein LOC111877832 [Lactuca sativa]		uncharacterized protein LOC111877832 [Lactuca sativa]	N-Term(Acetyl); T4(Phospho); K20(iTRAQ8plex)	0	S(2): 0.0; T(4): 1.4; T(6): 1.4; S(7): 48.6; T(10): 48.6; T(16): 0.0	168.343	74.07	2	6.84569e-06	2386.21	0.791981	0.912301	1.04005	0.910404	0.954251	1.05728	1.01456	1.06631	1.04605	0.912245	0.115403
gNTENVEEGVsDDEDNEDALk	2	PLY71364.1	hypothetical protein LSAT_4X125921 [Lactuca sativa]		hypothetical protein LSAT_4X125921 [Lactuca sativa]	N-Term(iTRAQ8plex); S11(Phospho); K21(iTRAQ8plex)	0	T(3): 0.0; S(11): 100.0	114.842	16.27	3	3.50885	2967.32	-0.154023	1.07591	0.983431	1.05233	1.03722	1.00405	0.929912	0.967046	0.967004	1.07261	0.115594
iLEDssEDDDDFVLSHk	19	XP_023758648.1	proteoglycan 4-like [Lactuca sativa]		proteoglycan 4-like [Lactuca sativa]	N-Term(iTRAQ8plex); S5(Phospho); S6(Phospho); K17(iTRAQ8plex)	0	S(5): 100.0; S(6): 100.0; S(15): 0.0	455.462	44.01	3	0.00513767	2732.22	-1.76674	1.02672	1.07722	1.02023	1.04139	0.996863	0.946142	1.01579	0.986265	1.05589	0.115621
fWSNQADsEtESEVSDyEQDDVNEGQEDATNAPDR	28	XP_023732798.1	eukaryotic translation initiation factor 3 subunit C-like [Lactuca sativa]		eukaryotic translation initiation factor 3 subunit C-like [Lactuca sativa]	N-Term(iTRAQ8plex); S8(Phospho); T10(Phospho); Y17(Phospho)	0	S(3): 0.0; S(8): 97.9; T(10): 51.0; S(12): 51.0; S(15): 50.0; Y(17): 50.0; T(30): 0.0	191.579	72.65	3	3.86251e-06	4521.71	1.43021	0.954056	1.0295	0.802378	0.928643	1.06078	1.07149	1.05487	1.06238	0.874118	0.116486
eSSVDEsssDVDSDDDVDWR	2	XP_023769993.1	zinc finger protein 830 [Lactuca sativa]		zinc finger protein 830 [Lactuca sativa]	N-Term(iTRAQ8plex); S7(Phospho); S8(Phospho); S9(Phospho)	0	S(2): 0.0; S(3): 0.0; S(7): 98.1; S(8): 51.9; S(9): 51.9; S(13): 98.1	120.769	27.14	2	0.026468	2787.97	-1.05074	0.906417	0.906749	0.980907	0.931358	1.01115	1.00427	1.21154	1.07565	0.865854	0.116852
tQEEEPtSISSS	6	XP_023728969.1	probable tRNA (guanine(26)-N(2))-dimethyltransferase 1 [Lactuca sativa]		probable tRNA (guanine(26)-N(2))-dimethyltransferase 1 [Lactuca sativa]	N-Term(iTRAQ8plex); T7(Phospho)	0	T(1): 0.0; T(7): 0.0; S(8): 0.0; S(10): 1.0; S(11): 49.5; S(12): 49.5	120.88	35.62	2	0.0111719	1678.74	-0.423574	0.974358	0.976207	0.955042	0.968536	1.05738	1.08472	0.971393	1.03783	0.933231	0.117341
dTLLAVDySDsDSDLTDANISQR	52	XP_023768658.1	BSD domain-containing protein 1-like [Lactuca sativa]		BSD domain-containing protein 1-like [Lactuca sativa]	N-Term(iTRAQ8plex); Y8(Phospho); S11(Phospho)	0	T(2): 0.0; Y(8): 94.7; S(9): 7.7; S(11): 48.7; S(13): 48.7; T(16): 0.2; S(21): 0.0	182.514	39.45	3	0.0137166	2978.29	2.80407	1.03666	1.01693	1.01341	1.02233	1.01181	0.942959	0.985027	0.979934	1.04327	0.117441
eEsDDEMGFSLFDD	2	XP_023738100.1	60S acidic ribosomal protein P2-like [Lactuca sativa]		60S acidic ribosomal protein P2-like [Lactuca sativa]	N-Term(iTRAQ8plex); S3(Phospho)	0	S(3): 100.0; S(10): 0.0	119.094	27.19	2	0.03877	2019.78	1.8478	1.06566	0.986214	1.04833	1.0334	0.929007	0.974362	1.00338	0.968917	1.06655	0.11746
tLsDTPPASPAGSTTPVsPFPGGR	8	XP_023746799.1	dormancy-associated protein homolog 3-like isoform X3 [Lactuca sativa]		dormancy-associated protein homolog 3-like isoform X3 [Lactuca sativa]	N-Term(iTRAQ8plex); T1(Phospho); S3(Phospho); S18(Phospho)	0	T(1): 0.0; S(3): 0.2; T(5): 99.8; S(9): 100.0; S(13): 0.0; T(14): 0.0; T(15): 0.0; S(18): 100.0	259.54	45.17	3	0.00358216	2841.24	-0.304579	1.00211	1.0137	1.07089	1.0289	0.998036	0.976323	0.910679	0.96168	1.0699	0.117493
aLVYILDEDEDEIsDAE	6	XP_023744206.1	anaphase-promoting complex subunit 4 [Lactuca sativa]		anaphase-promoting complex subunit 4 [Lactuca sativa]	N-Term(iTRAQ8plex); S14(Phospho)	0	Y(4): 0.0; S(14): 100.0	259.388	94.63	2	2.93386e-08	2323.04	-0.307758	0.970207	0.867102	1.02061	0.95264	1.08811	1.01546	1.05122	1.0516	0.905897	0.117874
vYVGNSESGTTPGGAAGASSPstPVSATR	1	PLY94898.1	hypothetical protein LSAT_4X71560 [Lactuca sativa]		hypothetical protein LSAT_4X71560 [Lactuca sativa]	N-Term(iTRAQ8plex); S22(Phospho); T23(Phospho)	0	Y(2): 0.0; S(6): 0.0; S(8): 0.0; T(10): 0.0; T(11): 0.0; S(19): 5.6; S(20): 89.1; S(22): 10.8; T(23): 94.0; S(26): 0.4; T(28): 0.0	199.476	38.12	3	0.0272341	3129.4	-1.81963	0.994949	0.811524	1.0091	0.938524	1.06422	1.11998	1.03736	1.07386	0.873975	0.117918
hEQQQVFsPPLtPILLSNLk	2	XP_023740717.1	uncharacterized protein At2g33490-like [Lactuca sativa]		uncharacterized protein At2g33490-like [Lactuca sativa]	N-Term(iTRAQ8plex); S8(Phospho); T12(Phospho); K20(iTRAQ8plex)	0	S(8): 100.0; T(12): 100.0; S(17): 0.0	193.198	21.15	3	1.64254	3057.6	-2.01696	1.10902	1.02288	0.998785	1.04356	1.00702	0.910182	0.953458	0.956885	1.09058	0.117938
kAEssDDsssEEsDsEEEVk	1	XP_023736442.1	nucleolin 1-like isoform X3 [Lactuca sativa]		nucleolin 1-like isoform X3 [Lactuca sativa]	K1(iTRAQ8plex); N-Term(iTRAQ8plex); S4(Phospho); S5(Phospho); S8(Phospho); S9(Phospho); S10(Phospho); S13(Phospho); S15(Phospho); K20(iTRAQ8plex)	1	S(4): 100.0; S(5): 100.0; S(8): 100.0; S(9): 100.0; S(10): 100.0; S(13): 100.0; S(15): 100.0	203.924	18.4	4	0.299929	3646.25	-0.826827	0.929522	0.852776	0.789544	0.857281	1.33193	0.869067	1.25007	1.15036	0.745231	0.119219
nAsEEEQIATk	1	XP_023749805.1	uncharacterized protein LOC111898111 isoform X2 [Lactuca sativa]		uncharacterized protein LOC111898111 isoform X2 [Lactuca sativa]	N-Term(iTRAQ8plex); S3(Phospho); K11(iTRAQ8plex)	0	S(3): 100.0; T(10): 0.0	149.205	17.67	3	2.13581	1907.95	-1.37809	1.04727	0.854885	0.896574	0.932911	1.10815	1.13382	0.9905	1.07749	0.86582	0.119545
lSQANEEVEGDEDsEEEEDTGMGEIDLDk	28	XP_023747375.1	eukaryotic translation initiation factor 2 subunit alpha homolog [Lactuca sativa]		eukaryotic translation initiation factor 2 subunit alpha homolog [Lactuca sativa]	N-Term(iTRAQ8plex); S14(Phospho); K29(iTRAQ8plex)	0	S(2): 0.0; S(14): 99.9; T(20): 0.1	267.197	85.81	3	5.028e-07	3900.7	2.94445	0.962537	0.953677	1.02163	0.979282	1.05062	1.00239	1.0368	1.02994	0.950816	0.120037
gREEGVVsSDEFsDEER	3	XP_023747445.1	uncharacterized protein LOC111895595 [Lactuca sativa]		uncharacterized protein LOC111895595 [Lactuca sativa]	N-Term(iTRAQ8plex); S8(Phospho); S13(Phospho)	1	S(8): 95.1; S(9): 4.9; S(13): 100.0	137.046	16.37	3	1.03458	2390.97	-1.18299	1.03492	1.03545	1.0427	1.03769	0.922052	1.0383	0.933456	0.964604	1.07577	0.12004
lDTsSPTGVSDNPSAAADEQk	3	XP_023750801.1	mitogen-activated protein kinase 9 isoform X2 [Lactuca sativa]		mitogen-activated protein kinase 9 isoform X2 [Lactuca sativa]	N-Term(iTRAQ8plex); S4(Phospho); K21(iTRAQ8plex)	0	T(3): 1.7; S(4): 48.3; S(5): 48.3; T(7): 1.7; S(10): 0.0; S(14): 0.0	222.156	16.89	3	3.68258	2778.33	-0.11941	1.01122	1.03883	1.07122	1.04042	0.96593	1.02476	0.910295	0.966996	1.07593	0.120525
lPSVPMPQYsPSsSPFGR	6	XP_023770273.1	autophagy-related protein 13b [Lactuca sativa]		autophagy-related protein 13b [Lactuca sativa]	N-Term(iTRAQ8plex); S10(Phospho); S13(Phospho)	0	S(3): 0.0; Y(9): 33.8; S(10): 33.8; S(12): 44.2; S(13): 44.2; S(14): 44.2	89.5903	11.49	3	7.69182	2398.09	0.697721	1.0411	1.01139	1.09233	1.04827	1.03628	0.926328	0.909282	0.957296	1.09504	0.120793
tGVVTEVAGDsDsDsssDDEDEDEDNEVVGPk	3	PLY74983.1	hypothetical protein LSAT_5X39960 [Lactuca sativa]		hypothetical protein LSAT_5X39960 [Lactuca sativa]	N-Term(iTRAQ8plex); S11(Phospho); S13(Phospho); S15(Phospho); S16(Phospho); S17(Phospho); K32(iTRAQ8plex)	0	T(1): 0.0; T(5): 0.2; S(11): 100.0; S(13): 100.0; S(15): 100.0; S(16): 100.0; S(17): 100.0	76.6834	44.57	3	0.00152225	4306.59	3.50551	1.05628	0.942296	0.795386	0.93132	1.02352	1.24404	1.10921	1.12559	0.827406	0.121519
iQRDDssssDsDSEk	2	XP_023744615.1	reticulon-like protein B1 [Lactuca sativa]		reticulon-like protein B1 [Lactuca sativa]	N-Term(iTRAQ8plex); S6(Phospho); S7(Phospho); S8(Phospho); S9(Phospho); S11(Phospho); K15(iTRAQ8plex)	1	S(6): 100.0; S(7): 100.0; S(8): 100.0; S(9): 100.0; S(11): 94.7; S(13): 5.4	133.269	21.2	2	0.13313	2663.94	0.977158	1.03248	1.05108	1.01069	1.03142	1.0272	0.939851	0.953983	0.973679	1.0593	0.121742
eVFDFDQVsQSQEVsPVTEPR	2	PLY76363.1	hypothetical protein LSAT_6X102941 [Lactuca sativa]		hypothetical protein LSAT_6X102941 [Lactuca sativa]	N-Term(iTRAQ8plex); S9(Phospho); S15(Phospho)	0	S(9): 50.0; S(11): 50.0; S(15): 99.8; T(18): 0.2	144.538	22.24	3	0.851372	2887.28	2.6465	1.076	0.842576	0.864794	0.927791	1.1153	1.03792	1.08696	1.08006	0.859019	0.121742
aEsPTELENIQSAEAPDLEFEk	1	XP_023735176.1	titin isoform X2 [Lactuca sativa]		titin isoform X2 [Lactuca sativa]	N-Term(iTRAQ8plex); S3(Phospho); K22(iTRAQ8plex)	0	S(3): 99.9; T(5): 0.1; S(12): 0.0	210.237	11.14	3	18.3745	3135.52	-2.53878	1.19906	1.09275	0.979523	1.09045	0.787519	0.907631	1.02634	0.907164	1.20204	0.121968
mmEEsGGAAAAAAPTTTTTTTGNEVEHTGAsNIk	4	XP_023758290.1	BAG family molecular chaperone regulator 4-like [Lactuca sativa]		BAG family molecular chaperone regulator 4-like [Lactuca sativa]	N-Term(Acetyl); M1(Oxidation); M2(Oxidation); S5(Phospho); S31(Phospho); K34(iTRAQ8plex)	0	S(5): 13.6; T(15): 13.6; T(16): 13.6; T(17): 13.6; T(18): 13.6; T(19): 13.6; T(20): 13.6; T(21): 13.6; T(28): 45.6; S(31): 45.6	39.7747	7.04	3	28.9033	3845.63	-2.91623	0.947528	0.966823	0.982745	0.965698	1.08065	0.969251	1.05225	1.03405	0.933899	0.122055
nSGVSSETTMsPVLGPsR	3	XP_023765183.1	uncharacterized protein At2g24330-like [Lactuca sativa]		uncharacterized protein At2g24330-like [Lactuca sativa]	N-Term(iTRAQ8plex); S11(Phospho); S17(Phospho)	0	S(2): 0.0; S(5): 0.0; S(6): 0.8; T(8): 33.1; T(9): 33.1; S(11): 33.1; S(17): 100.0	281.041	39.15	2	0.00926734	2270	-3.89527	0.986065	0.891942	0.953788	0.943932	0.963707	1.04776	1.07794	1.0298	0.916617	0.122349
gRsPAFNALASTFENANAR	4	XP_023761140.1	villin-4-like [Lactuca sativa]		villin-4-like [Lactuca sativa]	N-Term(iTRAQ8plex); S3(Phospho)	1	S(3): 100.0; S(11): 0.0; T(12): 0.0	185.53	12.4	3	8.95097	2378.14	-4.68766	1.03687	1.03842	1.03332	1.0362	0.940028	0.943631	1.03758	0.973745	1.06414	0.122431
aAADEDEDsDVDLFGEEtEEEk	2	XP_023728636.1	elongation factor 1-delta 1-like [Lactuca sativa]		elongation factor 1-delta 1-like [Lactuca sativa]	N-Term(iTRAQ8plex); S9(Phospho); T18(Phospho); K22(iTRAQ8plex)	0	S(9): 100.0; T(18): 100.0	206.097	35.51	3	0.0258976	3211.33	2.89257	1.05883	1.0394	1.00875	1.03566	0.911115	1.02029	0.97204	0.967816	1.0701	0.122945
iVsDDEEEEEDDDDDMDD	3	XP_023770167.1	crooked neck-like protein 1 [Lactuca sativa]		crooked neck-like protein 1 [Lactuca sativa]	N-Term(iTRAQ8plex); S3(Phospho)	0	S(3): 100.0	153.207	60.86	2	1.07876e-05	2513.87	-0.557848	0.984971	0.956842	0.94956	0.963791	0.982812	1.1036	1.02177	1.03606	0.930245	0.123955
nAsssDQEsQYsAAEDEEDSRPSLMR	1	XP_023739443.1	protein ENHANCED DISEASE RESISTANCE 2-like [Lactuca sativa]		protein ENHANCED DISEASE RESISTANCE 2-like [Lactuca sativa]	N-Term(iTRAQ8plex); S3(Phospho); S4(Phospho); S5(Phospho); S9(Phospho); S12(Phospho)	0	S(3): 100.0; S(4): 100.0; S(5): 100.0; S(9): 99.1; Y(11): 9.7; S(12): 91.2; S(20): 0.0; S(23): 0.0	131.912	35.45	3	0.00635777	3593.25	2.08838	0.818378	0.956442	1.02477	0.933196	1.10927	1.1385	0.991484	1.07975	0.86427	0.124302
mEQEFLENATNsTGsNSNk	4	XP_023737228.1	AT-hook motif nuclear-localized protein 20-like [Lactuca sativa]		AT-hook motif nuclear-localized protein 20-like [Lactuca sativa]	N-Term(iTRAQ8plex); S12(Phospho); S15(Phospho); K19(iTRAQ8plex)	0	T(10): 0.0; S(12): 96.8; T(13): 3.2; S(15): 99.9; S(17): 0.1	258.015	56.87	3	0.000236119	2869.25	-2.28517	1.05838	1.04957	1.04038	1.04944	1.04426	0.870018	0.937194	0.950492	1.1041	0.124376
vAtVPGVLSELDDEGFSSDAPSSVSQDR	1	XP_023736195.1	alpha,alpha-trehalose-phosphate synthase [UDP-forming] 5 [Lactuca sativa]		alpha,alpha-trehalose-phosphate synthase [UDP-forming] 5 [Lactuca sativa]	N-Term(iTRAQ8plex); T3(Phospho)	0	T(3): 80.4; S(9): 6.5; S(17): 6.5; S(18): 6.5; S(22): 0.1; S(23): 0.1; S(25): 0.0	55.8189	5.1	3	66.3332	3248.52	1.59595	0.885855	1.05367	0.917338	0.952288	1.05896	1.03681	1.06485	1.05354	0.903893	0.124435
vSsTISEsPIVNk	14	PLY99792.1	hypothetical protein LSAT_0X8120 [Lactuca sativa]		hypothetical protein LSAT_0X8120 [Lactuca sativa]	N-Term(iTRAQ8plex); S3(Phospho); S8(Phospho); K13(iTRAQ8plex)	0	S(2): 2.8; S(3): 94.4; T(4): 5.4; S(6): 2.9; S(8): 94.5	202.481	20.1	3	1.29679	2129.07	-1.45396	1.00234	0.905744	0.958412	0.955498	0.972759	1.07657	1.07125	1.04019	0.918578	0.125317
gSVsGYNtPNQYSQIGPLSR	4	PLY95924.1	hypothetical protein LSAT_9X38100 [Lactuca sativa]		hypothetical protein LSAT_9X38100 [Lactuca sativa]	N-Term(iTRAQ8plex); S4(Phospho); T8(Phospho)	0	S(2): 99.9; S(4): 0.1; Y(6): 0.0; T(8): 2.8; Y(12): 94.5; S(13): 2.8; S(19): 0.0	213.741	32.69	2	0.0682526	2589.17	2.18403	0.926401	0.964028	0.957768	0.949399	1.14425	1.07162	0.956442	1.05744	0.897831	0.125435
gNEtPVEEsEsEDDEIDDDNDEENDHEQEAEAEk	4	XP_023736032.1	nucleolar protein 58 [Lactuca sativa]		nucleolar protein 58 [Lactuca sativa]	N-Term(iTRAQ8plex); T4(Phospho); S9(Phospho); S11(Phospho); K34(iTRAQ8plex)	0	T(4): 100.0; S(9): 100.0; S(11): 100.0	118.524	6.84	4	16.6853	4739.77	-2.05435	1.07519	1.0178	0.992288	1.02843	0.994652	0.965873	0.974428	0.978318	1.05122	0.125743
aGSSTTLLsPPsSPR	8	XP_023762033.1	probable serine incorporator [Lactuca sativa]		probable serine incorporator [Lactuca sativa]	N-Term(iTRAQ8plex); S9(Phospho); S12(Phospho)	0	S(3): 0.0; S(4): 0.0; T(5): 0.0; T(6): 0.0; S(9): 100.0; S(12): 50.0; S(13): 50.0	224.837	29.57	2	0.086615	1921.9	-1.09265	0.992681	1.01724	1.04374	1.01789	0.987581	0.998003	0.95701	0.980865	1.03775	0.126087
aENVSsPsPSQSDSLPDESQVk	2	XP_023745783.1	E3 ubiquitin-protein ligase RBBP6-like [Lactuca sativa]		E3 ubiquitin-protein ligase RBBP6-like [Lactuca sativa]	N-Term(iTRAQ8plex); S6(Phospho); S8(Phospho); K22(iTRAQ8plex)	0	S(5): 4.6; S(6): 95.4; S(8): 99.7; S(10): 0.2; S(12): 0.0; S(14): 0.0; S(19): 0.0	160.014	14.33	3	6.35933	3056.39	-2.34467	1.00017	0.984544	0.954198	0.979637	1.04728	0.991525	1.02165	1.02015	0.960286	0.126164
nDFQSIVQQLTGsPSR	2	XP_023769524.1	protein HAIKU1 [Lactuca sativa]		protein HAIKU1 [Lactuca sativa]	N-Term(iTRAQ8plex); S13(Phospho)	0	S(5): 2.2; T(11): 47.8; S(13): 47.8; S(15): 2.2	107.405	7.47	3	20.8247	2161.06	-1.45153	1.06093	1.06504	1.00091	1.04229	0.929013	1.03443	0.918095	0.960513	1.08514	0.126594
fESFENPLTGQGSSsFDSHEEER	7	PLY98452.1	hypothetical protein LSAT_1X6680 [Lactuca sativa]		hypothetical protein LSAT_1X6680 [Lactuca sativa]	N-Term(iTRAQ8plex); S15(Phospho)	0	S(3): 0.0; T(9): 25.0; S(13): 25.0; S(14): 25.0; S(15): 25.0; S(18): 0.1	135.091	24.36	3	0.388424	3000.29	0.880208	0.985755	0.935518	0.975726	0.965666	1.05354	1.03114	0.974403	1.01969	0.947017	0.126995
tEsGLsVSGk	2	XP_023755544.1	mitogen-activated protein kinase kinase kinase YODA-like [Lactuca sativa]		mitogen-activated protein kinase kinase kinase YODA-like [Lactuca sativa]	N-Term(iTRAQ8plex); S3(Phospho); S6(Phospho); K10(iTRAQ8plex)	0	T(1): 0.0; S(3): 100.0; S(6): 100.0; S(8): 0.0	150.03	19.83	2	0.813738	1732.83	-4.32897	0.922235	0.873229	0.99983	0.931765	1.05127	1.20466	0.978011	1.07798	0.864362	0.127714
gFPPFFSSPSEtstPPsESPPMSPMDSSLSR	4	XP_023769821.1	zinc finger CCCH domain-containing protein 20 [Lactuca sativa]		zinc finger CCCH domain-containing protein 20 [Lactuca sativa]	N-Term(iTRAQ8plex); T12(Phospho); S13(Phospho); T14(Phospho); S17(Phospho)	0	Too many isoforms		4.41	3	27.947	3894.52	-2.08671	1.00998	0.903586	0.868811	0.927459	1.12201	1.17945	0.947721	1.08306	0.856332	0.129182
aAEAASLILQESQsLPStPLR	12	XP_023739997.1	WEB family protein At5g55860 [Lactuca sativa]		WEB family protein At5g55860 [Lactuca sativa]	N-Term(iTRAQ8plex); S14(Phospho); T18(Phospho)	0	S(6): 0.0; S(12): 3.8; S(14): 92.5; S(17): 7.5; T(18): 96.2	280.248	54.31	3	0.000706888	2646.31	0.311221	1.00398	1.08295	0.993185	1.0267	0.892885	0.979896	0.977488	0.950089	1.08064	0.129642
dVEAVsQEssGsGAtLGESLR	3	XP_023746600.1	E3 ubiquitin-protein ligase UPL2-like [Lactuca sativa]		E3 ubiquitin-protein ligase UPL2-like [Lactuca sativa]	N-Term(iTRAQ8plex); S6(Phospho); S9(Phospho); S10(Phospho); S12(Phospho); T15(Phospho)	0	S(6): 100.0; S(9): 100.0; S(10): 100.0; S(12): 100.0; T(15): 99.9; S(19): 0.1	121.72	36.75	2	0.00667863	2783.05	9.31072	1.02494	1.00162	1.0041	1.01022	0.965201	0.923943	1.00361	0.964252	1.04767	0.129896
sSNVQEDVVEsTGPAtPR	3	XP_023738047.1	BTB/POZ domain-containing protein At3g44820 [Lactuca sativa]		BTB/POZ domain-containing protein At3g44820 [Lactuca sativa]	N-Term(iTRAQ8plex); S11(Phospho); T16(Phospho)	0	S(1): 0.0; S(2): 0.0; S(11): 99.8; T(12): 0.2; T(16): 100.0	184.023	26.89	3	0.187147	2337.04	1.71682	1.08113	0.976543	1.0764	1.04469	0.992687	0.871462	0.97799	0.94738	1.10272	0.130166
sTQENEELEssEDDGMPPLEANTNR	7	XP_023735826.1	probable RNA-binding protein EIF1AD [Lactuca sativa]		probable RNA-binding protein EIF1AD [Lactuca sativa]	N-Term(iTRAQ8plex); S10(Phospho); S11(Phospho)	0	S(1): 0.0; T(2): 0.0; S(10): 100.0; S(11): 100.0; T(23): 0.0	203.636	41.05	3	0.00612876	3256.32	-0.257788	0.974472	1.08707	1.06508	1.04221	0.945204	1.01129	0.918556	0.958349	1.0875	0.13017
lFLFsLSDLDDSNSVHSNSGGDSEFQFVVAVNGMDmGGsR	4	XP_023737018.1	probable LIM domain-containing serine/threonine-protein kinase DDB_G0287001 [Lactuca sativa]		probable LIM domain-containing serine/threonine-protein kinase DDB_G0287001 [Lactuca sativa]	N-Term(iTRAQ8plex); S5(Phospho); M36(Oxidation); S39(Phospho)	0	S(5): 37.7; S(7): 37.7; S(12): 16.7; S(14): 16.7; S(17): 16.7; S(19): 16.7; S(23): 16.7; S(39): 41.2	15.9388	9.24	3	18.8633	4717.97	-14.5175	1.17351	0.736148	0.57379	0.827816	1.14	1.26974	1.12692	1.17889	0.702201	0.130277
eAsLEsNEDR	1	PLY80938.1	hypothetical protein LSAT_8X149701 [Lactuca sativa]		hypothetical protein LSAT_8X149701 [Lactuca sativa]	N-Term(iTRAQ8plex); S3(Phospho); S6(Phospho)	0	S(3): 100.0; S(6): 100.0	164.431	17.45	2	0.287819	1613.64	-0.28594	1.10531	0.989483	1.05032	1.04837	1.00842	0.891754	0.9715	0.957225	1.09522	0.130422
aANSPEDYDsDDEYIAGPR	8	XP_023752816.1	tobamovirus multiplication protein 2A-like [Lactuca sativa]		tobamovirus multiplication protein 2A-like [Lactuca sativa]	N-Term(iTRAQ8plex); S10(Phospho)	0	S(4): 0.0; Y(8): 0.0; S(10): 100.0; Y(14): 0.0	449.454	95.86	2	1.70697e-08	2469.05	2.22406	1.00288	1.01683	1.0586	1.0261	0.982547	0.983562	1.00686	0.990988	1.03543	0.13092
lLAtPtPLGtPLYSIPEENR	5	XP_023763576.1	splicing factor 3B subunit 1 [Lactuca sativa]		splicing factor 3B subunit 1 [Lactuca sativa]	N-Term(iTRAQ8plex); T4(Phospho); T6(Phospho); T10(Phospho)	0	T(4): 100.0; T(6): 100.0; T(10): 100.0; Y(13): 0.0; S(14): 0.0	341.809	61.24	3	0.000126912	2726.28	0.255818	0.962426	0.972623	0.951153	0.962067	1.05219	0.973573	0.997144	1.00764	0.954777	0.131678
eSWEDGNPGsWGSSPQYQPGsPR	9	PLY78401.1	hypothetical protein LSAT_3X132801 [Lactuca sativa]		hypothetical protein LSAT_3X132801 [Lactuca sativa]	N-Term(iTRAQ8plex); S10(Phospho); S21(Phospho)	0	S(2): 0.0; S(10): 89.3; S(13): 5.4; S(14): 5.4; Y(17): 0.0; S(21): 100.0	152.689	31.65	3	0.0460956	2969.2	-1.25634	0.930444	0.960634	1.03113	0.97407	1.15446	1.06087	1.00562	1.07365	0.907252	0.131802
sGGGVGLELVcLsDDD	2	XP_023737998.1	helicase protein MOM1-like [Lactuca sativa]		helicase protein MOM1-like [Lactuca sativa]	N-Term(iTRAQ8plex); C11(Carbamidomethyl); S13(Phospho)	0	S(1): 0.0; S(13): 100.0	163.221	18.19	2	0.969395	1976.88	-0.437474	0.965105	0.990355	0.949087	0.968183	0.971546	1.07783	1.04631	1.0319	0.938254	0.131898
dMATQMsPEGsPySSPR	4	XP_023762977.1	uncharacterized protein LOC111911431 [Lactuca sativa]		uncharacterized protein LOC111911431 [Lactuca sativa]	N-Term(iTRAQ8plex); S7(Phospho); S11(Phospho); Y13(Phospho)	0	T(4): 5.2; S(7): 94.7; S(11): 73.0; Y(13): 27.0; S(14): 50.0; S(15): 50.0	101.231	19.77	2	0.230384	2384.89	1.02832	0.972292	0.86674	1.01575	0.951594	1.11612	1.03474	1.0119	1.05425	0.902625	0.132117
rEsPGYsGAEsPPDR	19	XP_023755561.1	serine/arginine-rich splicing factor RS40-like isoform X3 [Lactuca sativa]		serine/arginine-rich splicing factor RS40-like isoform X3 [Lactuca sativa]	N-Term(iTRAQ8plex); S3(Phospho); S7(Phospho); S11(Phospho)	1	S(3): 100.0; Y(6): 0.1; S(7): 99.9; S(11): 100.0	334.819	31.62	2	0.0228288	2148.83	-0.381885	1.00971	1.03025	1.02203	1.02066	1.01959	0.980843	0.969507	0.989979	1.03099	0.13282
fDsFRsTAQDSEYDQGFNEQQTTLSR	2	XP_023770376.1	epidermal growth factor receptor substrate 15-like 1 isoform X2 [Lactuca sativa]		epidermal growth factor receptor substrate 15-like 1 isoform X2 [Lactuca sativa]	N-Term(iTRAQ8plex); S3(Phospho); S6(Phospho)	1	S(3): 99.8; S(6): 50.0; T(7): 50.0; S(11): 0.2; Y(13): 0.0; T(22): 0.0; T(23): 0.0; S(25): 0.0	173.188	21.94	3	0.764163	3521.49	0.466692	1.07857	1.00145	1.06039	1.0468	0.939011	1.0362	0.892966	0.956059	1.09491	0.132936
lSsALIENQR	5	XP_023747831.1	uncharacterized protein LOC111896041 [Lactuca sativa]		uncharacterized protein LOC111896041 [Lactuca sativa]	N-Term(iTRAQ8plex); S3(Phospho)	0	S(2): 0.0; S(3): 100.0	273.808	14.48	2	3.70175	1514.79	1.43815	0.933992	0.997694	0.956626	0.962771	1.00576	1.00162	1.11463	1.04067	0.925145	0.133247
aAADEDEDsDVDLFGEETEEEkk	15	XP_023728636.1	elongation factor 1-delta 1-like [Lactuca sativa]		elongation factor 1-delta 1-like [Lactuca sativa]	N-Term(iTRAQ8plex); S9(Phospho); K22(iTRAQ8plex); K23(iTRAQ8plex)	1	S(9): 100.0; T(18): 0.0	462.445	53.61	4	0.00101452	3563.66	0.286554	0.935848	0.987319	0.912384	0.945184	1.00525	0.999267	1.1708	1.05844	0.892997	0.134075
gLVsYGDIsP	1	XP_023773042.1	peptidyl-prolyl cis-trans isomerase CYP63 isoform X3 [Lactuca sativa]		peptidyl-prolyl cis-trans isomerase CYP63 isoform X3 [Lactuca sativa]	N-Term(iTRAQ8plex); S4(Phospho); S9(Phospho)	0	S(4): 50.0; Y(5): 50.0; S(9): 100.0	119.678	13.24	2	1.22592	1471.64	1.10575	0.804531	1.01815	0.988154	0.936943	1.07921	1.12057	1.02024	1.07334	0.872922	0.13443
sGLDLGGSDGIDAPPLSGGETsR	7	XP_023740983.1	SUN domain-containing protein 1-like [Lactuca sativa]		SUN domain-containing protein 1-like [Lactuca sativa]	N-Term(iTRAQ8plex); S22(Phospho)	0	S(1): 0.0; S(8): 0.0; S(17): 3.0; T(21): 3.0; S(22): 93.9	166.845	11.48	3	10.2379	2542.19	-4.1761	0.924441	1.01103	0.990994	0.975489	1.00531	1.03617	1.10198	1.04782	0.930971	0.134979
dIEsEDEDFLDELNQPQPDIVR	1	PLY77605.1	hypothetical protein LSAT_2X87061 [Lactuca sativa]		hypothetical protein LSAT_2X87061 [Lactuca sativa]	N-Term(iTRAQ8plex); S4(Phospho)	0	S(4): 100.0	125.083	8.76	3	21.2673	3000.36	-3.67235	1.12309	0.988307	1.09837	1.06992	1.02812	0.954568	0.83355	0.938745	1.13974	0.135205
aSFDEDDssPDDDLEEDFk	1	PLY97342.1	hypothetical protein LSAT_4X146300 [Lactuca sativa]		hypothetical protein LSAT_4X146300 [Lactuca sativa]	N-Term(iTRAQ8plex); S8(Phospho); S9(Phospho); K19(iTRAQ8plex)	0	S(2): 0.9; S(8): 99.5; S(9): 99.5	93.6605	12.81	3	3.32748	2944.19	2.36509	1.11482	0.984732	1.11025	1.06993	0.86266	0.886429	1.05155	0.933547	1.14609	0.135534
nRsPsPPAR	5	XP_023748523.1	serine/arginine-rich splicing factor SR45 [Lactuca sativa]		serine/arginine-rich splicing factor SR45 [Lactuca sativa]	N-Term(iTRAQ8plex); S3(Phospho); S5(Phospho)	1	S(3): 100.0; S(5): 100.0	156.885	27.66	3	0.0803846	1445.66	-1.34909	0.96998	0.8809	1.01556	0.955481	0.988342	1.16268	1.07343	1.07482	0.888973	0.135709
gGsDsEVEk	10	XP_023734697.1	H/ACA ribonucleoprotein complex subunit 2-like protein [Lactuca sativa]		H/ACA ribonucleoprotein complex subunit 2-like protein [Lactuca sativa]	N-Term(iTRAQ8plex); S3(Phospho); S5(Phospho); K9(iTRAQ8plex)	0	S(3): 100.0; S(5): 100.0	258.25	25.99	2	0.116317	1675.74	-2.00464	0.989195	0.959228	0.967677	0.972033	1.10878	0.986779	1.0273	1.04095	0.933793	0.135713
lFLFPVTTQTPSItPAHsFGSTEGR	1	XP_023744825.1	uncharacterized protein LOC111892981 [Lactuca sativa]		uncharacterized protein LOC111892981 [Lactuca sativa]	N-Term(iTRAQ8plex); T14(Phospho); S18(Phospho)	0	T(7): 4.6; T(8): 4.6; T(10): 4.6; S(12): 43.3; T(14): 43.3; S(18): 82.1; S(21): 8.8; T(22): 8.8	62.2412	11.2	3	18.0579	3155.52	1.2826	1.01785	0.895587	0.897466	0.936967	1.15184	1.11723	0.952364	1.07381	0.872562	0.136672
sGsEGssGHsGGAPAk	2	XP_023731312.1	integrin-linked protein kinase 1-like [Lactuca sativa]		integrin-linked protein kinase 1-like [Lactuca sativa]	N-Term(Acetyl); S1(Phospho); S3(Phospho); S6(Phospho); S7(Phospho); S10(Phospho); K16(iTRAQ8plex)	0	S(1): 100.0; S(3): 100.0; S(6): 100.0; S(7): 100.0; S(10): 100.0	187.999	9.34	2	0.419085	2118.65	-0.745069	0.997091	0.994068	1.37213	1.1211	0.838573	0.873054	0.935759	0.882462	1.27042	0.137328
lADSDAtPAGGAtPGAtPAGmAWDAtPk	1	XP_023763576.1	splicing factor 3B subunit 1 [Lactuca sativa]		splicing factor 3B subunit 1 [Lactuca sativa]	N-Term(iTRAQ8plex); T7(Phospho); T13(Phospho); T17(Phospho); M21(Oxidation); T26(Phospho); K28(iTRAQ8plex)	0	S(4): 0.9; T(7): 99.2; T(13): 99.9; T(17): 100.0; T(26): 100.0	108.627	19.47	3	1.40942	3542.49	1.72924	1.08792	0.987135	1.11474	1.06326	0.840291	1.0145	0.972532	0.942442	1.1282	0.137957
mYVDEDGYsQSDGyDNSYGk	18	XP_023731581.1	histone-lysine N-methyltransferase, H3 lysine-9 specific SUVH1-like [Lactuca sativa]		histone-lysine N-methyltransferase, H3 lysine-9 specific SUVH1-like [Lactuca sativa]	N-Term(iTRAQ8plex); S9(Phospho); Y14(Phospho); K20(iTRAQ8plex)	0	Y(2): 0.0; Y(8): 5.2; S(9): 64.8; S(11): 64.8; Y(14): 64.9; S(17): 0.2; Y(18): 0.1	117.715	27.65	3	0.113554	3061.23	1.25766	1.02739	0.914192	0.994509	0.978697	1.0851	1.01854	1.04723	1.05029	0.931835	0.138408
aAEAASLILQESQsLPStPLRk	22	XP_023739997.1	WEB family protein At5g55860 [Lactuca sativa]		WEB family protein At5g55860 [Lactuca sativa]	N-Term(iTRAQ8plex); S14(Phospho); T18(Phospho); K22(iTRAQ8plex)	1	S(6): 0.0; S(12): 2.3; S(14): 97.7; S(17): 2.3; T(18): 97.7	281.591	26.13	4	0.522057	3078.6	-4.46738	1.00914	1.0529	0.99214	1.01806	0.945155	0.955667	1.00743	0.969417	1.05018	0.139408
vsSTVSESPIVYk	3	XP_023767664.1	mitochondrial import receptor subunit TOM9-2-like [Lactuca sativa]		mitochondrial import receptor subunit TOM9-2-like [Lactuca sativa]	N-Term(iTRAQ8plex); S2(Phospho); K13(iTRAQ8plex)	0	S(2): 33.3; S(3): 33.3; T(4): 33.3; S(6): 0.0; S(8): 0.0; Y(12): 0.0	154.911	11.4	3	9.75453	2084.11	-3.48536	1.04473	0.901586	0.914365	0.953559	1.10726	1.00334	1.05173	1.05411	0.904611	0.139925
sDsHsssssDEEcDESGEk	3	PLY62111.1	hypothetical protein LSAT_8X28441 [Lactuca sativa]		hypothetical protein LSAT_8X28441 [Lactuca sativa]	N-Term(iTRAQ8plex); S3(Phospho); S5(Phospho); S6(Phospho); S7(Phospho); S8(Phospho); S9(Phospho); C13(Carbamidomethyl); K19(iTRAQ8plex)	0	S(1): 52.0; S(3): 52.0; S(5): 96.0; S(6): 100.0; S(7): 100.0; S(8): 100.0; S(9): 100.0; S(16): 0.0	183.668	35.39	3	0.00497197	3146.93	-2.60044	1.2212	0.962413	0.993622	1.05908	0.971425	0.85327	0.856032	0.893575	1.18522	0.14102
tEmGAEGGGsPSPSPLSTSk	3	XP_023747909.1	heat shock factor-binding protein 1-like isoform X2 [Lactuca sativa]		heat shock factor-binding protein 1-like isoform X2 [Lactuca sativa]	N-Term(iTRAQ8plex); M3(Oxidation); S10(Phospho); K20(iTRAQ8plex)	0	T(1): 0.0; S(10): 96.5; S(12): 3.5; S(14): 0.0; S(17): 0.0; T(18): 0.0; S(19): 0.0	177.825	27.33	3	0.312434	2581.23	-0.571336	1.00683	1.08081	1.05236	1.04667	1.0342	0.891368	0.958777	0.961449	1.08863	0.141062
fQSLNsPSQVLGLPSWLGsSNDLk	4	XP_023752699.1	protein SPIRRIG-like [Lactuca sativa]		protein SPIRRIG-like [Lactuca sativa]	N-Term(iTRAQ8plex); S6(Phospho); S19(Phospho); K24(iTRAQ8plex)	0	S(3): 0.4; S(6): 94.0; S(8): 5.7; S(15): 0.2; S(19): 49.9; S(20): 49.9	120.894	7.27	3	49.4624	3342.66	-1.57932	0.998001	0.920149	0.909841	0.942664	0.944127	1.12165	1.1194	1.06173	0.887859	0.1412
dSAFsDsDLsQEELR	7	PLY93892.1	hypothetical protein LSAT_4X138820 [Lactuca sativa]		hypothetical protein LSAT_4X138820 [Lactuca sativa]	N-Term(iTRAQ8plex); S5(Phospho); S7(Phospho); S10(Phospho)	0	S(2): 0.0; S(5): 100.0; S(7): 100.0; S(10): 100.0	310.073	49.31	2	0.000219201	2242.85	0.0699175	0.952834	0.940399	1.01438	0.969204	0.992811	1.02205	1.03736	1.01741	0.952621	0.141238
fEDHsEtSSSHGGTGVTSAGAVAVPQLPk	67	XP_023759370.1	protein argonaute 4-like isoform X2 [Lactuca sativa]		protein argonaute 4-like isoform X2 [Lactuca sativa]	N-Term(iTRAQ8plex); S5(Phospho); T7(Phospho); K29(iTRAQ8plex)	0	S(5): 94.3; T(7): 20.4; S(8): 20.4; S(9): 20.4; S(10): 20.4; T(14): 21.3; T(17): 1.3; S(18): 1.3	200.851	13.75	4	10.7933	3621.7	-2.985	0.97678	0.999245	0.921096	0.965707	1.06361	0.974278	1.07532	1.03774	0.930589	0.142051
aFFDsADWALGk	1	XP_023754677.1	uncharacterized protein LOC111903120 [Lactuca sativa]		uncharacterized protein LOC111903120 [Lactuca sativa]	N-Term(iTRAQ8plex); S5(Phospho); K12(iTRAQ8plex)	0	S(5): 100.0	130.018	16.73	2	2.86001	2016.01	-1.76372	0.973784	0.9889	0.92587	0.962851	0.989445	1.01773	1.11786	1.04168	0.924326	0.143088
dSGNsLQSSSDIsDDEGLGk	5	XP_023772378.1	phototropin-1 isoform X2 [Lactuca sativa]		phototropin-1 isoform X2 [Lactuca sativa]	N-Term(iTRAQ8plex); S5(Phospho); S13(Phospho); K20(iTRAQ8plex)	0	S(2): 0.6; S(5): 7.2; S(8): 88.7; S(9): 49.7; S(10): 49.7; S(13): 4.2	63.5955	3.3	3	52.5267	2779.22	-0.267579	1.16368	1.05741	0.969181	1.06342	0.858291	0.989973	0.964944	0.937736	1.13403	0.143583
vDNLDTEEEEAsDQEGGHsGDEEk	1	XP_023760794.1	sister chromatid cohesion protein PDS5 homolog B-like isoform X2 [Lactuca sativa]		sister chromatid cohesion protein PDS5 homolog B-like isoform X2 [Lactuca sativa]	N-Term(iTRAQ8plex); S12(Phospho); S19(Phospho); K24(iTRAQ8plex)	0	T(6): 50.0; S(12): 50.0; S(19): 100.0	95.3109	8.53	3	13.0041	3387.4	2.20637	0.99947	0.916988	0.915591	0.944017	1.02218	1.18547	0.988099	1.06525	0.886193	0.144299
aVPPPDSsDQELDDDVAPETLLDIVk	10	XP_023733964.1	uncharacterized protein LOC111881803 [Lactuca sativa]		uncharacterized protein LOC111881803 [Lactuca sativa]	N-Term(iTRAQ8plex); S8(Phospho); K26(iTRAQ8plex)	0	S(7): 49.3; S(8): 49.3; T(20): 1.4	98.2939	19.61	3	2.80928	3466.73	-1.36184	1.0023	0.96623	0.968215	0.978915	1.0372	1.0276	0.982877	1.01589	0.963601	0.144492
nAsssDQEsQYSAAEDEEDSRPSLMR	2	XP_023739443.1	protein ENHANCED DISEASE RESISTANCE 2-like [Lactuca sativa]		protein ENHANCED DISEASE RESISTANCE 2-like [Lactuca sativa]	N-Term(iTRAQ8plex); S3(Phospho); S4(Phospho); S5(Phospho); S9(Phospho)	0	S(3): 54.8; S(4): 54.8; S(5): 54.8; S(9): 90.2; Y(11): 72.5; S(12): 72.5; S(20): 0.3; S(23): 0.0	87.7871	5.25	3	8.44863	3513.27	-1.26275	1.14171	1.06774	0.975244	1.06156	0.93666	1.02306	0.86717	0.942296	1.12657	0.144892
pVDtTAVIAWGsGEDGQLGLGDNEEk	2	XP_023759847.1	ultraviolet-B receptor UVR8-like [Lactuca sativa]		ultraviolet-B receptor UVR8-like [Lactuca sativa]	N-Term(Acetyl); T4(Phospho); S12(Phospho); K26(iTRAQ8plex)	0	T(4): 90.6; T(5): 18.8; S(12): 90.6	34.2077	6.04	3	39.4484	3164.41	1.93772	1.00419	1.08427	1.08136	1.05661	0.837833	1.02796	0.969467	0.945087	1.118	0.146628
fLtSVsLTk	4	XP_023739439.1	R-linalool synthase QH1, chloroplastic-like [Lactuca sativa]		R-linalool synthase QH1, chloroplastic-like [Lactuca sativa]	N-Term(iTRAQ8plex); T3(Phospho); S6(Phospho); K9(iTRAQ8plex)	0	T(3): 50.0; S(4): 50.0; S(6): 100.0; T(8): 0.0	109.96	21.37	3	0.930058	1763.92	-1.71076	1.06786	1.0751	1.00726	1.05007	0.858238	1.03062	0.966355	0.951738	1.10332	0.146631
hAFAGsDEDEDDDDsWsE	2	XP_023749923.1	protein SCAR4-like [Lactuca sativa]		protein SCAR4-like [Lactuca sativa]	N-Term(iTRAQ8plex); S6(Phospho); S15(Phospho); S17(Phospho)	0	S(6): 100.0; S(15): 100.0; S(17): 100.0	174.076	31.76	2	0.00296729	2570.81	1.50464	1.07428	0.994518	1.063	1.04393	1.02399	0.970467	0.894197	0.962884	1.08417	0.147127
smYGTAGDGsssDEEGVSk	4	PLY66520.1	hypothetical protein LSAT_4X167420 [Lactuca sativa]		hypothetical protein LSAT_4X167420 [Lactuca sativa]	N-Term(iTRAQ8plex); M2(Oxidation); S10(Phospho); S11(Phospho); S12(Phospho); K19(iTRAQ8plex)	0	S(1): 0.0; Y(3): 0.0; T(5): 0.0; S(10): 100.0; S(11): 100.0; S(12): 100.0; S(18): 0.0	146.865	43.27	3	0.00197339	2728.05	-1.74688	1.01216	1.0823	1.05721	1.05056	0.978382	1.024	0.852959	0.95178	1.10378	0.147471
sIVEETNPSkTtPVVsPVNsFDSR	3	XP_023734910.1	probable calcium-binding protein CML25 [Lactuca sativa]		probable calcium-binding protein CML25 [Lactuca sativa]	N-Term(iTRAQ8plex); K10(iTRAQ8plex); T12(Phospho); S16(Phospho); S20(Phospho)	1	S(1): 0.0; T(6): 94.4; S(9): 5.6; T(11): 49.9; T(12): 49.9; S(16): 0.2; S(20): 100.0; S(23): 0.0	171.415	17.38	3	4.07575	3438.6	-1.80357	1.09389	1.03744	1.0098	1.04704	1.02529	0.988457	0.942984	0.985576	1.06237	0.147911
vEDVGEssGIsENG	1	XP_023751029.1	uncharacterized protein LOC111899412 [Lactuca sativa]		uncharacterized protein LOC111899412 [Lactuca sativa]	N-Term(iTRAQ8plex); S7(Phospho); S8(Phospho); S11(Phospho)	0	S(7): 100.0; S(8): 100.0; S(11): 100.0	84.6528	26.8	2	0.0244448	1922.7	0.855129	1.06821	1.0625	0.976883	1.03586	0.982851	1.00055	0.922919	0.968773	1.06925	0.150069
vVDVSENIQsDSPHSAVNPSQFR	2	XP_023765550.1	trifunctional UDP-glucose 4,6-dehydratase/UDP-4-keto-6-deoxy-D-glucose 3,5-epimerase/UDP-4-keto-L-rhamnose-reductase RHM1 [Lactuca sativa]		trifunctional UDP-glucose 4,6-dehydratase/UDP-4-keto-6-deoxy-D-glucose 3,5-epimerase/UDP-4-keto-L-rhamnose-reductase RHM1 [Lactuca sativa]	N-Term(iTRAQ8plex); S10(Phospho)	0	S(5): 0.1; S(10): 49.9; S(12): 49.9; S(15): 0.1; S(20): 0.0	96.7782	8.2	3	27.8268	2896.37	-1.15086	0.933868	0.914189	0.893512	0.913856	0.922808	1.27196	1.08787	1.09421	0.835172	0.150259
sSDQIQNVDDNSGAtsPTEAQk	6	XP_023733586.1	lysine-specific demethylase REF6 [Lactuca sativa]		lysine-specific demethylase REF6 [Lactuca sativa]	N-Term(iTRAQ8plex); T15(Phospho); S16(Phospho); K22(iTRAQ8plex)	0	S(1): 0.0; S(2): 0.0; S(12): 12.5; T(15): 93.2; S(16): 93.2; T(18): 1.0	96.1092	7.59	3	29.393	3060.38	5.60497	0.958245	0.883681	1.02238	0.954768	1.07996	1.11643	0.976398	1.0576	0.902772	0.150984
mQALEFTNLsPTPR	1	PLY62102.1	hypothetical protein LSAT_6X65481 [Lactuca sativa]		hypothetical protein LSAT_6X65481 [Lactuca sativa]	N-Term(iTRAQ8plex); S10(Phospho)	0	T(7): 2.4; S(10): 95.1; T(12): 2.4	88.5995	6.49	2	26.9939	1988.99	2.26418	0.866761	1.02066	0.973657	0.953694	0.989806	1.06959	1.09928	1.05289	0.905783	0.151483
aIEEDPDYSEysDsVTTGSR	13	PLY77529.1	hypothetical protein LSAT_2X86661 [Lactuca sativa]		hypothetical protein LSAT_2X86661 [Lactuca sativa]	N-Term(iTRAQ8plex); Y11(Phospho); S12(Phospho); S14(Phospho)	0	Y(8): 0.0; S(9): 50.6; Y(11): 50.6; S(12): 98.7; S(14): 99.9; T(16): 0.1; T(17): 0.0; S(19): 0.0	307.578	57.4	2	6.01411e-05	2765.05	1.24038	1.05495	1.06872	0.966247	1.02997	1.00618	0.947002	0.917042	0.956741	1.07654	0.151904
tDNPIPVSNDAQVLANELEEDDssGDEDk	7	XP_023765356.1	uncharacterized protein LOC111913871 [Lactuca sativa]		uncharacterized protein LOC111913871 [Lactuca sativa]	N-Term(iTRAQ8plex); S23(Phospho); S24(Phospho); K29(iTRAQ8plex)	0	T(1): 0.0; S(8): 4.8; S(23): 97.6; S(24): 97.6	101.608	10	3	20.21	3884.7	-2.58788	0.921796	0.884441	1.0345	0.946914	1.1469	1.04331	0.990993	1.0604	0.892975	0.152268
msSLDAMEAWANTQk	16	XP_023730080.1	probable sucrose-phosphate synthase 1 [Lactuca sativa]		probable sucrose-phosphate synthase 1 [Lactuca sativa]	N-Term(iTRAQ8plex); S2(Phospho); K15(iTRAQ8plex)	0	S(2): 50.0; S(3): 50.0; T(13): 0.0	258.431	26.18	3	0.321361	2371.12	-4.46216	0.922517	1.00698	0.914159	0.947885	1.00698	1.0049	1.18624	1.06604	0.889165	0.152664
sLSmPPTPTtPGtPtTPSPTAAR	3	XP_023736750.1	dormancy-associated protein 1-like [Lactuca sativa]		dormancy-associated protein 1-like [Lactuca sativa]	N-Term(iTRAQ8plex); M4(Oxidation); T10(Phospho); T13(Phospho); T15(Phospho)	0	S(1): 0.4; S(3): 82.4; T(7): 5.7; T(9): 5.7; T(10): 5.7; T(13): 0.0; T(15): 0.5; T(16): 99.5; S(18): 99.5; T(20): 0.5	117.576	11.48	3	8.74793	2826.26	9.09773	0.998725	1.01866	1.02914	1.01551	0.941368	0.887101	1.01566	0.948042	1.07116	0.153054
lPPAEAAAQGSGFSsPALsSGk	1	PLY96210.1	hypothetical protein LSAT_3X69001 [Lactuca sativa]		hypothetical protein LSAT_3X69001 [Lactuca sativa]	N-Term(iTRAQ8plex); S15(Phospho); S19(Phospho); K22(iTRAQ8plex)	0	S(11): 48.7; S(14): 48.7; S(15): 2.6; S(19): 95.0; S(20): 5.0	148.78	16.34	3	4.31332	2798.36	-2.16052	0.818432	1.06395	0.910465	0.930948	1.15175	1.00952	1.06776	1.07634	0.864918	0.153398
sSNVQEDVVEStGPAtPRGsVDQPR	1	XP_023738047.1	BTB/POZ domain-containing protein At3g44820 [Lactuca sativa]		BTB/POZ domain-containing protein At3g44820 [Lactuca sativa]	N-Term(iTRAQ8plex); T12(Phospho); T16(Phospho); S20(Phospho)	1	S(1): 0.0; S(2): 0.0; S(11): 66.7; T(12): 66.7; T(16): 66.7; S(20): 100.0	107.995	1.98	3	74.0043	3156.35	-2.18171	1.18379	1.13067	0.934436	1.08297	1.02029	0.827816	0.903522	0.917211	1.18072	0.15348
ySLDDsDDEsDILLGk	3	XP_023761490.1	CHD3-type chromatin-remodeling factor PICKLE isoform X2 [Lactuca sativa]		CHD3-type chromatin-remodeling factor PICKLE isoform X2 [Lactuca sativa]	N-Term(iTRAQ8plex); S6(Phospho); S10(Phospho); K16(iTRAQ8plex)	0	Y(1): 0.0; S(2): 0.0; S(6): 100.0; S(10): 100.0	90.0011	15.11	2	3.55492	2553.15	-1.53817	1.05493	0.970779	0.894889	0.973533	1.06802	1.02226	1.10412	1.0648	0.914288	0.153695
tAPEEVEsPSsVNkETEPEGASEVR	5	XP_023760843.1	nuclear pore complex protein NUP50A-like [Lactuca sativa]		nuclear pore complex protein NUP50A-like [Lactuca sativa]	N-Term(iTRAQ8plex); S8(Phospho); S11(Phospho); K14(iTRAQ8plex)	1	T(1): 0.0; S(8): 3.4; S(10): 96.6; S(11): 99.9; T(16): 0.1; S(22): 0.0	258.297	21.68	3	1.40256	3426.58	-0.336212	0.916944	1.00417	0.975776	0.965631	1.09797	1.05772	0.974679	1.04346	0.925417	0.154991
tVsLEQGsAVR	1	XP_023765403.1	protein STRUBBELIG-RECEPTOR FAMILY 7-like [Lactuca sativa]		protein STRUBBELIG-RECEPTOR FAMILY 7-like [Lactuca sativa]	N-Term(iTRAQ8plex); S3(Phospho); S8(Phospho)	0	T(1): 0.0; S(3): 100.0; S(8): 100.0	101.679	1.05	2	47.0356	1610.75	-1.03991	1.14297	0.991289	1.00458	1.04628	0.979326	0.932699	0.962676	0.958234	1.09188	0.155438
nIYYDNDkGEssEDEEEAEVVR	4	XP_023745719.1	something about silencing protein 10 isoform X2 [Lactuca sativa]		something about silencing protein 10 isoform X2 [Lactuca sativa]	N-Term(iTRAQ8plex); K8(iTRAQ8plex); S11(Phospho); S12(Phospho)	1	Y(3): 0.0; Y(4): 0.0; S(11): 100.0; S(12): 100.0	165.831	13.78	3	6.43058	3358.46	3.81017	1.02524	0.956272	0.923766	0.968425	1.08587	0.990095	1.04298	1.03965	0.931493	0.155563
tSNADTDMEsDssDsDEDELDNEGPk	4	XP_023763789.1	glutamate-rich WD repeat-containing protein 1-like [Lactuca sativa]		glutamate-rich WD repeat-containing protein 1-like [Lactuca sativa]	N-Term(iTRAQ8plex); S10(Phospho); S12(Phospho); S13(Phospho); S15(Phospho); K26(iTRAQ8plex)	0	T(1): 0.0; S(2): 0.0; T(6): 0.0; S(10): 100.0; S(12): 100.0; S(13): 100.0; S(15): 100.0	137.389	57.93	3	4.05077e-05	3731.33	0.153694	1.05703	0.946261	0.794354	0.932547	1.095	1.00298	1.17486	1.09095	0.854806	0.156365
iESQLStLtISSSSTNASPGR	5	XP_023731900.1	homeotic protein knotted-1 isoform X1 [Lactuca sativa]		homeotic protein knotted-1 isoform X1 [Lactuca sativa]	N-Term(iTRAQ8plex); T7(Phospho); T9(Phospho)	0	S(3): 0.0; S(6): 1.0; T(7): 16.4; T(9): 1.0; S(11): 16.4; S(12): 16.4; S(13): 16.4; S(14): 16.4; T(15): 16.4; S(18): 99.9	74.2717	15.42	3	4.50138	2600.22	1.52315	0.932169	0.959081	0.9906	0.960617	0.958551	1.0612	1.10209	1.04061	0.923125	0.156409
lVNSGGNsPTFNNNIVQScDEAk	1	XP_023769205.1	microtubule-associated protein 70-1-like [Lactuca sativa]		microtubule-associated protein 70-1-like [Lactuca sativa]	N-Term(iTRAQ8plex); S8(Phospho); C19(Carbamidomethyl); K23(iTRAQ8plex)	0	S(4): 1.8; S(8): 49.1; T(10): 49.1; S(18): 0.1	118.697	29.66	3	0.255543	3153.51	-0.89587	1.04193	1.0531	1.13107	1.07537	0.899539	1.08036	0.819099	0.932999	1.15259	0.158247
wSPEDFEVYEEGLEGsDIESt	7	XP_023739710.1	mRNA turnover protein 4 homolog [Lactuca sativa]		mRNA turnover protein 4 homolog [Lactuca sativa]	N-Term(iTRAQ8plex); S16(Phospho); T21(Phospho)	0	S(2): 0.0; Y(9): 0.0; S(16): 100.0; S(20): 50.0; T(21): 50.0	231.959	75.83	2	1.60517e-06	2882.16	2.60097	0.968141	1.08609	1.04626	1.0335	0.934314	1.0145	0.903567	0.950793	1.08699	0.159245
assLSssDEVSEQVYNEk	6	XP_023768517.1	myb-like protein X [Lactuca sativa]		myb-like protein X [Lactuca sativa]	N-Term(iTRAQ8plex); S2(Phospho); S3(Phospho); S6(Phospho); S7(Phospho); K18(iTRAQ8plex)	0	S(2): 100.0; S(3): 99.9; S(5): 66.7; S(6): 66.7; S(7): 66.7; S(11): 0.0; Y(15): 0.0	212.173	13.56	3	2.65214	2887.16	1.33849	0.901412	0.847378	1.03948	0.929423	1.19395	1.07354	0.969134	1.07887	0.861476	0.159272
vNFsPMPSPTyVYTk	1	XP_023767836.1	uncharacterized protein LOC111916396 isoform X2 [Lactuca sativa]		uncharacterized protein LOC111916396 isoform X2 [Lactuca sativa]	N-Term(iTRAQ8plex); S4(Phospho); Y11(Phospho); K15(iTRAQ8plex)	0	S(4): 100.0; S(8): 1.6; T(10): 49.2; Y(11): 49.2; Y(13): 0.1; T(14): 0.0	145.781	18.39	3	2.23618	2499.19	1.55894	0.915269	1.01787	0.96728	0.966805	1.00106	1.1014	1.01929	1.04058	0.929099	0.159652
asAEVLGk	10	XP_023756227.1;XP_023749664.1;XP_023735740.1;XP_023772279.1	probable inactive receptor kinase RLK902 [Lactuca sativa]		probable inactive receptor kinase RLK902 [Lactuca sativa]	N-Term(iTRAQ8plex); S2(Phospho); K8(iTRAQ8plex)	0	S(2): 100.0	249.913	21.5	2	0.844579	1462.81	-4.43829	1.05088	1.05836	1.05692	1.05539	0.914847	0.838445	1.06667	0.939988	1.12277	0.160639
sLsWSVPNSWSATk	3	XP_023754980.1	uncharacterized protein LOC111903439 [Lactuca sativa]		uncharacterized protein LOC111903439 [Lactuca sativa]	N-Term(iTRAQ8plex); S1(Phospho); S3(Phospho); K14(iTRAQ8plex)	0	S(1): 100.0; S(3): 100.0; S(5): 0.0; S(9): 0.0; S(11): 0.0; T(13): 0.0	133.918	15.75	3	3.65051	2318.1	-1.69761	1.03028	0.962444	1.16586	1.05286	0.936738	0.963718	0.948091	0.949516	1.10884	0.161736
dGEAsDVEEEYEAk	13	XP_023772734.1	eukaryotic translation initiation factor 3 subunit B-like [Lactuca sativa]		eukaryotic translation initiation factor 3 subunit B-like [Lactuca sativa]	N-Term(iTRAQ8plex); S5(Phospho); K14(iTRAQ8plex)	0	S(5): 100.0; Y(11): 0.0	447.819	56.14	2	0.000209534	2259.01	-1.441	0.931245	0.987096	0.924019	0.947453	1.0493	0.948433	1.1207	1.03948	0.91147	0.162342
rPGYNAsDsDsEELLDDS	4	XP_023749924.1	uncharacterized protein LOC111898226 [Lactuca sativa]		uncharacterized protein LOC111898226 [Lactuca sativa]	N-Term(iTRAQ8plex); S7(Phospho); S9(Phospho); S11(Phospho)	0	Y(4): 0.3; S(7): 99.7; S(9): 100.0; S(11): 100.0; S(18): 0.0	208.311	32.52	2	0.0122027	2513.93	-1.05272	1.04367	1.00538	1.04548	1.03151	0.986368	1.02508	0.93915	0.983534	1.04878	0.162679
sDLDLQIPTAFDPFAEANAEDSGAGSk	3	XP_023729574.1	protein translation factor SUI1 homolog [Lactuca sativa]		protein translation factor SUI1 homolog [Lactuca sativa]	N-Term(Acetyl); S1(Phospho); K27(iTRAQ8plex)	0	S(1): 100.0; T(9): 0.0; S(22): 0.0; S(26): 0.0	193.701	59.14	3	0.00023624	3192.47	5.32708	0.972829	1.08706	1.04579	1.03523	1.01919	0.922799	0.931883	0.957957	1.08066	0.163842
aQADsQDEsLSDIDsEEER	5	PLY99591.1	hypothetical protein LSAT_5X119261 [Lactuca sativa]		hypothetical protein LSAT_5X119261 [Lactuca sativa]	N-Term(iTRAQ8plex); S5(Phospho); S9(Phospho); S15(Phospho)	0	S(5): 100.0; S(9): 50.0; S(11): 50.0; S(15): 100.0	186.604	44.86	2	0.000803406	2667.99	1.42175	1.0805	0.858303	0.93495	0.957916	1.09634	1.09559	1.03167	1.07453	0.891472	0.164343
tLsLPPVQIEELQPsPPVsPk	10	XP_023770721.1	uncharacterized protein LOC111919361 [Lactuca sativa]		uncharacterized protein LOC111919361 [Lactuca sativa]	N-Term(iTRAQ8plex); S3(Phospho); S15(Phospho); S19(Phospho); K21(iTRAQ8plex)	0	T(1): 4.7; S(3): 95.3; S(15): 100.0; S(19): 100.0	243.801	24.24	3	0.901829	3104.56	-0.0230543	1.00428	0.984028	0.994329	0.994213	0.993972	1.02561	1.04683	1.02214	0.972681	0.16449
gGDsGDNEVEELATEVEEEPPPPLPk	4	XP_023761832.1	nitrate regulatory gene2 protein-like [Lactuca sativa]		nitrate regulatory gene2 protein-like [Lactuca sativa]	N-Term(iTRAQ8plex); S4(Phospho); K26(iTRAQ8plex)	0	S(4): 100.0; T(14): 0.0	196.25	13.64	3	11.001	3422.62	-3.45356	0.852354	1.02033	0.965145	0.945945	1.02136	1.01963	1.05514	1.03204	0.916574	0.165131
gLVsYGDGsPDsQk	3	XP_023763432.1	peptidyl-prolyl cis-trans isomerase CYP95 isoform X2 [Lactuca sativa]		peptidyl-prolyl cis-trans isomerase CYP95 isoform X2 [Lactuca sativa]	N-Term(iTRAQ8plex); S4(Phospho); S9(Phospho); S12(Phospho); K14(iTRAQ8plex)	0	S(4): 96.7; Y(5): 3.4; S(9): 99.9; S(12): 100.0	112.003	20.88	2	0.521388	2257.97	2.19553	1.10857	0.956331	1.04086	1.03526	0.978614	0.96313	0.927592	0.956445	1.0824	0.165744
mEGGsPDQESVVSGTk	1	XP_023731559.1	uncharacterized protein LOC111879352 [Lactuca sativa]		uncharacterized protein LOC111879352 [Lactuca sativa]	N-Term(Acetyl); S5(Phospho); K16(iTRAQ8plex)	0	S(5): 100.0; S(10): 0.0; S(13): 0.0; T(15): 0.0	150.165	41.7	2	0.00500301	2033.91	2.34709	1.05558	1.05242	0.995925	1.03464	0.930078	1.03535	0.944595	0.970006	1.06664	0.166028
lDDIFAAESsSPR	6	XP_023739534.1	zinc finger CCCH domain-containing protein 30 [Lactuca sativa]		zinc finger CCCH domain-containing protein 30 [Lactuca sativa]	N-Term(iTRAQ8plex); S10(Phospho)	0	S(9): 33.3; S(10): 33.3; S(11): 33.3	113.385	22.62	2	0.456758	1791.85	0.838185	0.926076	0.943019	1.02312	0.964073	0.985735	1.03428	1.11024	1.04342	0.923957	0.166596
lDGPISEFEPMDsGsELEEDDVk	5	XP_023747914.1	uncharacterized protein LOC111896128 [Lactuca sativa]		uncharacterized protein LOC111896128 [Lactuca sativa]	N-Term(iTRAQ8plex); S13(Phospho); S15(Phospho); K23(iTRAQ8plex)	0	S(6): 0.0; S(13): 100.0; S(15): 100.0	244.486	58	3	0.000257783	3306.45	0.674123	0.937648	1.02949	0.920912	0.962682	0.980478	1.1517	1.05913	1.06377	0.904974	0.166743
lFLFPVSGQsPALtPNHsFGSTDQGR	14	XP_023763038.1	uncharacterized protein LOC111911491 [Lactuca sativa]		uncharacterized protein LOC111911491 [Lactuca sativa]	N-Term(iTRAQ8plex); S10(Phospho); T14(Phospho); S18(Phospho)	0	S(7): 0.2; S(10): 99.8; T(14): 100.0; S(18): 99.8; S(21): 0.2; T(22): 0.0	429.716	65.31	3	4.86566e-05	3304.48	0.0782522	0.933585	1.04336	0.937639	0.971529	1.02393	1.04847	1.02768	1.03336	0.940163	0.167644
gGRsYsPsPPR	6	XP_023754846.1;PLY95693.1	serine/arginine-rich SC35-like splicing factor SCL30A [Lactuca sativa]		serine/arginine-rich SC35-like splicing factor SCL30A [Lactuca sativa]	N-Term(iTRAQ8plex); S4(Phospho); S6(Phospho); S8(Phospho)	1	S(4): 99.8; Y(5): 0.3; S(6): 99.8; S(8): 100.0	124.43	30.33	3	0.0195098	1704.68	-1.89855	0.985697	1.02839	1.04369	1.01926	1.02245	0.923945	0.923659	0.956686	1.06541	0.167687
sQANAQEPEsQtENsDAEk	1	PLY84162.1	hypothetical protein LSAT_6X117800 [Lactuca sativa]		hypothetical protein LSAT_6X117800 [Lactuca sativa]	N-Term(iTRAQ8plex); S10(Phospho); T12(Phospho); S15(Phospho); K19(iTRAQ8plex)	0	S(1): 0.0; S(10): 100.0; T(12): 100.0; S(15): 100.0	70.111	4.49	3	24.2363	2911.19	-1.2401	0.935156	0.954142	0.925231	0.938176	1.01281	1.22787	0.974283	1.07165	0.875447	0.16783
sLDIALLSDQtSFR	6	XP_023730582.1	mitogen-activated protein kinase kinase kinase 1-like [Lactuca sativa]		mitogen-activated protein kinase kinase kinase 1-like [Lactuca sativa]	N-Term(iTRAQ8plex); S1(Phospho); T11(Phospho)	0	S(1): 0.1; S(8): 98.1; T(11): 50.9; S(12): 50.9	80.3365	14.43	2	3.66708	2029.95	-1.28728	0.921145	0.989479	0.987214	0.965946	1.05634	1.06563	0.968024	1.03	0.937814	0.170076
qGDDsGsDsDEPQEYYTGGEk	4	PLY85691.1	hypothetical protein LSAT_7X92681 [Lactuca sativa]		hypothetical protein LSAT_7X92681 [Lactuca sativa]	N-Term(iTRAQ8plex); S5(Phospho); S7(Phospho); S9(Phospho); K21(iTRAQ8plex)	0	S(5): 100.0; S(7): 100.0; S(9): 100.0; Y(15): 0.0; Y(16): 0.0; T(17): 0.0	304.731	41.03	3	0.00329744	3112.18	-0.367473	1.0371	0.852957	0.993535	0.961196	1.03094	1.06872	1.06954	1.0564	0.909882	0.170211
fWtDyIAAR	4	XP_023752507.1	mitogen-activated protein kinase 14-like [Lactuca sativa]		mitogen-activated protein kinase 14-like [Lactuca sativa]	N-Term(iTRAQ8plex); T3(Phospho); Y5(Phospho)	0	T(3): 100.0; Y(5): 100.0	229.538	17.71	2	0.557437	1606.7	-0.840692	0.974867	0.951467	1.00223	0.976189	0.991984	1.00891	1.07723	1.02604	0.951412	0.170795
mEsPQSVVSPFk	7	XP_023762164.1	uncharacterized protein LOC111910554 [Lactuca sativa]		uncharacterized protein LOC111910554 [Lactuca sativa]	N-Term(Acetyl); S3(Phospho); K12(iTRAQ8plex)	0	S(3): 100.0; S(6): 0.0; S(9): 0.0	227.342	41.91	2	0.00505029	1761.84	-0.601872	1.03613	0.937757	0.964271	0.979387	1.0113	1.02676	1.08381	1.04062	0.941155	0.170907
tPASVPMMPTPPPSALNLssPk	1	XP_023755517.1	protein MOR1 isoform X2 [Lactuca sativa]		protein MOR1 isoform X2 [Lactuca sativa]	N-Term(iTRAQ8plex); S19(Phospho); S20(Phospho); K22(iTRAQ8plex)	0	T(1): 0.0; S(4): 0.0; T(10): 0.1; S(14): 0.1; S(19): 99.9; S(20): 99.9	92.5673	14.17	3	8.55996	2988.49	1.81952	0.995577	1.2538	0.990149	1.07984	0.99902	0.880347	0.8843	0.921222	1.17218	0.171361
vHsIR	4	XP_023755995.1	uncharacterized protein LOC111904464 [Lactuca sativa]		uncharacterized protein LOC111904464 [Lactuca sativa]	N-Term(iTRAQ8plex); S3(Phospho)	0	S(3): 100.0	108.079	11.04	3	2.22734	995.533	-0.756851	0.932081	1.14184	1.10036	1.05809	0.942784	0.887067	0.990951	0.940267	1.12531	0.171453
sIPsSPTScYSLPTSFEk	2	PLY62285.1	hypothetical protein LSAT_5X71201 [Lactuca sativa]		hypothetical protein LSAT_5X71201 [Lactuca sativa]	S1(Phospho); N-Term(iTRAQ8plex); S4(Phospho); C9(Carbamidomethyl); K18(iTRAQ8plex)	0	S(1): 100.0; S(4): 97.5; S(5): 2.3; T(7): 0.1; S(8): 0.1; Y(10): 0.1; S(11): 0.1; T(14): 0.0; S(15): 0.0	152.032	16.4	3	3.57719	2756.27	-3.03254	1.0956	0.997474	1.02556	1.03954	0.962215	0.893072	1.02456	0.959948	1.08292	0.171823
sSsFSsDDEEDHQDASIR	5	PLY81181.1	hypothetical protein LSAT_4X134040 [Lactuca sativa]		hypothetical protein LSAT_4X134040 [Lactuca sativa]	N-Term(iTRAQ8plex); S3(Phospho); S6(Phospho)	0	S(1): 0.2; S(2): 0.6; S(3): 0.5; S(5): 99.4; S(6): 99.4; S(16): 0.0	157.298	9.73	3	3.7245	2475.95	0.045103	1.0501	1.04189	1.05275	1.04825	0.880777	0.911343	1.06612	0.952745	1.10024	0.171842
aQtPsASAITVNPR	3	XP_023763668.1	uncharacterized protein LOC111912171 [Lactuca sativa]		uncharacterized protein LOC111912171 [Lactuca sativa]	N-Term(iTRAQ8plex); T3(Phospho); S5(Phospho)	0	T(3): 100.0; S(5): 100.0; S(7): 0.0; T(10): 0.0	114.826	8.1	3	14.2491	1876.88	-2.86229	0.932434	0.932939	0.980202	0.948525	1.02542	1.166	0.963291	1.05157	0.902007	0.171937
tGDDGEFMGHsPPPsPR	25	XP_023738173.1	SNF1-related protein kinase regulatory subunit beta-2 [Lactuca sativa]		SNF1-related protein kinase regulatory subunit beta-2 [Lactuca sativa]	N-Term(iTRAQ8plex); S11(Phospho); S15(Phospho)	0	T(1): 0.0; S(11): 100.0; S(15): 100.0	510.696	40.92	3	0.00322829	2247.91	-0.652025	1.03584	0.993376	1.03847	1.02256	0.974912	1.01694	0.975075	0.988977	1.03396	0.172137
ssPsPPPsPSTTSQYSVAAFR	10	XP_023730187.1	protein ALP1-like [Lactuca sativa]		protein ALP1-like [Lactuca sativa]	N-Term(iTRAQ8plex); S2(Phospho); S4(Phospho); S8(Phospho)	0	S(1): 96.7; S(2): 6.6; S(4): 96.7; S(8): 100.0; S(10): 0.0; T(11): 0.0; T(12): 0.0; S(13): 0.0; Y(15): 0.0; S(16): 0.0	392.361	72.2	3	5.68816e-06	2695.14	0.101466	0.984012	1.02884	1.03684	1.01656	1.00063	0.986306	0.969418	0.985453	1.03157	0.17244
qLsPGFLEDALEEDDEQDYYDSR	1	XP_023742931.1	protein LEO1 homolog isoform X2 [Lactuca sativa]		protein LEO1 homolog isoform X2 [Lactuca sativa]	N-Term(iTRAQ8plex); S3(Phospho)	0	S(3): 100.0; Y(19): 0.0; Y(20): 0.0; S(22): 0.0	104.082	8.54	3	16.6131	3118.34	2.54903	1.10913	1.23879	0.922118	1.09001	0.782058	0.978938	0.957257	0.906084	1.20299	0.173022
nAtEDDDEsEVEMLsIssGDEDSVTDQk	7	XP_023748778.1	exocyst complex component SEC5A-like isoform X2 [Lactuca sativa]		exocyst complex component SEC5A-like isoform X2 [Lactuca sativa]	N-Term(iTRAQ8plex); T3(Phospho); S9(Phospho); S15(Phospho); S17(Phospho); S18(Phospho); K28(iTRAQ8plex)	0	T(3): 100.0; S(9): 100.0; S(15): 100.0; S(17): 99.7; S(18): 99.7; S(23): 0.6; T(25): 0.0	222.679	37.82	3	0.00705388	4053.5	1.37631	0.956582	0.985918	0.907532	0.950011	1.18961	0.954342	1.06242	1.06879	0.888866	0.173087
ttEDsDDSLLVDELDQAMPMPWSR	1	PLY69185.1	hypothetical protein LSAT_3X121920 [Lactuca sativa]		hypothetical protein LSAT_3X121920 [Lactuca sativa]	N-Term(iTRAQ8plex); T2(Phospho); S5(Phospho)	0	T(1): 2.5; T(2): 48.7; S(5): 48.7; S(8): 100.0; S(23): 0.0	150.385	22.93	3	0.613744	3215.35	0.94469	1.24609	0.947346	1.10011	1.09785	0.808488	0.839743	1.06191	0.90338	1.21527	0.173211
aSQSESSIVEssDEEssDGEG	2	PLY69448.1	hypothetical protein LSAT_6X72881 [Lactuca sativa]		hypothetical protein LSAT_6X72881 [Lactuca sativa]	N-Term(iTRAQ8plex); S11(Phospho); S12(Phospho); S16(Phospho); S17(Phospho)	0	S(2): 0.0; S(4): 0.1; S(6): 0.1; S(7): 0.2; S(11): 99.9; S(12): 99.8; S(16): 99.9; S(17): 99.9	139.331	45.13	2	0.000342196	2739.91	1.01094	0.831072	0.810635	0.973386	0.871698	1.2103	0.848003	1.20007	1.08612	0.802578	0.173444
lsSDISAPPPSVLR	2	XP_023761973.1	uncharacterized protein LOC111910361 [Lactuca sativa]		uncharacterized protein LOC111910361 [Lactuca sativa]	N-Term(iTRAQ8plex); S2(Phospho)	0	S(2): 49.9; S(3): 49.9; S(6): 0.1; S(11): 0.1	61.7602	11.02	2	9.0256	1822.96	0.634091	0.86243	1.04142	0.97364	0.959163	1.02326	1.06565	1.05501	1.04798	0.915252	0.173524
lVQVSPTTDGSSDELVYSssPk	11	PLY94900.1	hypothetical protein LSAT_4X70101 [Lactuca sativa]		hypothetical protein LSAT_4X70101 [Lactuca sativa]	N-Term(iTRAQ8plex); S19(Phospho); S20(Phospho); K22(iTRAQ8plex)	0	S(5): 0.0; T(7): 0.0; T(8): 0.0; S(11): 96.0; S(12): 4.0; Y(17): 0.0; S(18): 0.2; S(19): 4.0; S(20): 95.9	172.65	46.27	3	0.00476581	3064.45	-3.02242	1.08976	0.969798	1.07492	1.04483	0.93203	1.02136	0.950072	0.96782	1.07957	0.173603
sFLGAAAITDDsEEEEGYYPEGLDVAVGNR	7	XP_023750179.1	UDP-glucosyl transferase 73B2-like [Lactuca sativa]		UDP-glucosyl transferase 73B2-like [Lactuca sativa]	N-Term(iTRAQ8plex); S12(Phospho)	0	S(1): 0.0; T(9): 32.8; S(12): 32.8; Y(18): 32.8; Y(19): 1.6	132.061	32.37	3	0.12168	3558.6	-2.25431	1.00812	1.05271	1.03024	1.03036	0.898198	0.985053	1.0188	0.967351	1.06513	0.174061
hAFAGsDEDEDDDDSWsE	2	XP_023749923.1	protein SCAR4-like [Lactuca sativa]		protein SCAR4-like [Lactuca sativa]	N-Term(iTRAQ8plex); S6(Phospho); S17(Phospho)	0	S(6): 100.0; S(15): 0.0; S(17): 100.0	313.594	100.54	2	7.37372e-10	2490.84	-0.86279	0.988701	0.955289	1.00349	0.982492	1.05345	0.987748	1.02393	1.02171	0.961616	0.174077
asPQQS	1	XP_023757573.1	far upstream element-binding protein 2 [Lactuca sativa]		far upstream element-binding protein 2 [Lactuca sativa]	N-Term(iTRAQ8plex); S2(Phospho)	0	S(2): 100.0; S(6): 0.0	94.2393	20.15	2	0.0734199	1001.46	-0.510947	0.743514	0.726412	0.718828	0.729585	1.98107	0.915279	0.987121	1.29449	0.563608	0.175893
gEPNVsYIcSR	3	XP_023731230.1	shaggy-related protein kinase kappa isoform X3 [Lactuca sativa]		shaggy-related protein kinase kappa isoform X3 [Lactuca sativa]	N-Term(iTRAQ8plex); S6(Phospho); C9(Carbamidomethyl)	0	S(6): 33.3; Y(7): 33.3; S(10): 33.3	123.549	4.99	2	20.6814	1665.76	-1.48632	1.0725	1.0539	1.00364	1.04335	0.943323	0.880852	1.04694	0.957038	1.09018	0.176299
sIGDLsMDsAIsMPAAFGR	5	XP_023737931.1	protein IQ-DOMAIN 14-like [Lactuca sativa]		protein IQ-DOMAIN 14-like [Lactuca sativa]	N-Term(iTRAQ8plex); S1(Phospho); S6(Phospho); S9(Phospho); S12(Phospho)	0	S(1): 100.0; S(6): 100.0; S(9): 100.0; S(12): 100.0	190.203	31.85	2	0.020247	2549.97	-4.34492	1.05206	1.0393	1.00251	1.03129	0.89044	0.974459	1.02394	0.962946	1.07097	0.176568
gNIGNDDsDDDLFG	3	XP_023761037.1	protein phosphatase 1 regulatory inhibitor subunit PPP1R8 homolog [Lactuca sativa]		protein phosphatase 1 regulatory inhibitor subunit PPP1R8 homolog [Lactuca sativa]	N-Term(iTRAQ8plex); S8(Phospho)	0	S(8): 100.0	200.18	49.39	2	0.000319923	1837.73	-4.67839	0.965626	1.05054	0.906232	0.974131	1.043	1.05087	1.03461	1.04282	0.934129	0.178382
fYMEPDtsDsGSMTSGR	16	XP_023772276.1	protein argonaute 1-like [Lactuca sativa]		protein argonaute 1-like [Lactuca sativa]	N-Term(iTRAQ8plex); T7(Phospho); S8(Phospho); S10(Phospho)	0	Y(2): 0.0; T(7): 100.0; S(8): 99.8; S(10): 99.8; S(12): 0.4; T(14): 0.0; S(15): 0.0	161.232	36	2	0.00321521	2411.85	0.55171	0.969489	0.95391	1.02458	0.98266	1.04876	1.04802	0.991299	1.02936	0.954633	0.178636
iADFGLASFFDPGQsQPLtSR	3	XP_023750107.1	probable serine/threonine-protein kinase At1g54610 [Lactuca sativa]		probable serine/threonine-protein kinase At1g54610 [Lactuca sativa]	N-Term(iTRAQ8plex); S15(Phospho); T19(Phospho)	0	S(8): 0.0; S(15): 100.0; T(19): 94.3; S(20): 5.7	151.187	14.07	3	5.72727	2718.25	0.308459	0.949064	1.07526	1.16056	1.06163	0.919893	0.859201	1.02447	0.93452	1.13602	0.179068
aPsFsGPLNLPNR	1	XP_023770281.1	serine/threonine-protein kinase BLUS1-like [Lactuca sativa]		serine/threonine-protein kinase BLUS1-like [Lactuca sativa]	N-Term(iTRAQ8plex); S3(Phospho); S5(Phospho)	0	S(3): 100.0; S(5): 100.0	207.573	17.2	2	1.56248	1833.86	-1.44487	0.985619	0.924676	0.877127	0.929141	1.08056	1.23513	0.928924	1.08154	0.859093	0.179571
kASsDsEEEEQDVQQk	4	XP_023752638.1	splicing factor 3B subunit 2 [Lactuca sativa]		splicing factor 3B subunit 2 [Lactuca sativa]	N-Term(iTRAQ8plex); K1(iTRAQ8plex); S4(Phospho); S6(Phospho); K16(iTRAQ8plex)	1	S(3): 2.7; S(4): 97.3; S(6): 100.0	250.044	21.61	3	1.20412	2909.35	-2.58208	0.933093	0.988201	0.881519	0.934271	1.00274	0.964202	1.15464	1.04053	0.897884	0.181584
aITsLPVsPSAsPLR	8	XP_023732191.1	mitogen-activated protein kinase kinase kinase 3-like [Lactuca sativa]		mitogen-activated protein kinase kinase kinase 3-like [Lactuca sativa]	N-Term(iTRAQ8plex); S4(Phospho); S8(Phospho); S12(Phospho)	0	T(3): 0.2; S(4): 99.8; S(8): 100.0; S(10): 0.0; S(12): 100.0	265.088	28.92	2	0.120796	2039.95	-0.287529	1.0991	1.01433	1.01108	1.0415	0.908875	1.04206	0.929345	0.960094	1.08479	0.181869
aGVPLNVPGSTNsPk	10	PLY82568.1	hypothetical protein LSAT_2X108341 [Lactuca sativa]		hypothetical protein LSAT_2X108341 [Lactuca sativa]	N-Term(iTRAQ8plex); S13(Phospho); K15(iTRAQ8plex)	0	S(10): 0.1; T(11): 0.1; S(13): 99.7	165.252	14.49	3	5.22245	2126.15	-0.449731	0.988294	0.961373	1.02852	0.99273	1.00626	1.06349	1.03228	1.03401	0.960077	0.181886
sDEGVYHSAPk	5	XP_023737908.1	dehydrin ERD14-like [Lactuca sativa]		dehydrin ERD14-like [Lactuca sativa]	N-Term(Acetyl); S1(Phospho); K11(iTRAQ8plex)	0	S(1): 100.0; Y(6): 0.0; S(8): 0.0	268.127	42.2	2	0.00315741	1615.73	-1.31462	1.0387	0.988085	1.07762	1.0348	0.980604	0.93099	1.01791	0.976501	1.05971	0.181931
vQDGNVFIDcAVNTsPGTSEVIINAALYLR	3	XP_023759245.1	uncharacterized protein LOC111907670 isoform X3 [Lactuca sativa]		uncharacterized protein LOC111907670 isoform X3 [Lactuca sativa]	N-Term(iTRAQ8plex); C10(Carbamidomethyl); S15(Phospho)	0	T(14): 25.0; S(15): 25.0; T(18): 25.0; S(19): 25.0; Y(28): 0.0	93.5847	1.54	4	185.851	3620.8	1.97465	0.941927	1.18825	1.10515	1.07844	0.854617	1.04924	0.874781	0.926213	1.16436	0.184853
sVsPPPPGLSLSsSPR	37	XP_023740717.1	uncharacterized protein At2g33490-like [Lactuca sativa]		uncharacterized protein At2g33490-like [Lactuca sativa]	N-Term(iTRAQ8plex); S3(Phospho); S13(Phospho)	0	S(1): 0.1; S(3): 99.9; S(10): 0.0; S(12): 33.3; S(13): 33.3; S(14): 33.3	270.949	33.72	3	0.0490011	2028.97	-1.11345	0.999611	0.99392	1.0865	1.02668	1.00131	0.971885	0.939665	0.970954	1.05739	0.185045
sPVPNsPIAk	5	XP_023737060.1	pollen-specific leucine-rich repeat extensin-like protein 1 isoform X1 [Lactuca sativa]		pollen-specific leucine-rich repeat extensin-like protein 1 isoform X1 [Lactuca sativa]	N-Term(iTRAQ8plex); S6(Phospho); K10(iTRAQ8plex)	0	S(1): 0.0; S(6): 100.0	136.7	37.2	3	0.0194548	1697.94	-0.488506	1.02207	1.08297	1.05942	1.05482	0.897283	0.858683	1.07656	0.944175	1.11719	0.186212
iMsQSDIsPLASGR	2	PLY78223.1	hypothetical protein LSAT_8X57160 [Lactuca sativa]		hypothetical protein LSAT_8X57160 [Lactuca sativa]	N-Term(iTRAQ8plex); S3(Phospho); S8(Phospho)	0	S(3): 99.8; S(5): 0.2; S(8): 100.0; S(12): 0.0	155.743	16.69	2	1.59431	1925.88	2.46061	0.938618	1.00396	0.968011	0.970196	1.05483	0.964948	1.08307	1.03428	0.938038	0.187115
mQALEFTNLsPtPR	18	PLY62102.1	hypothetical protein LSAT_6X65481 [Lactuca sativa]		hypothetical protein LSAT_6X65481 [Lactuca sativa]	N-Term(iTRAQ8plex); S10(Phospho); T12(Phospho)	0	T(7): 0.0; S(10): 100.0; T(12): 100.0	370.874	62.94	2	4.74621e-05	2068.95	0.867817	1.02283	0.96249	0.971763	0.985693	1.00292	1.03611	1.01845	1.01916	0.967166	0.187385
vDAPVDVAPEkPVDSPtVPETk	4	XP_023764401.1	remorin-like isoform X1 [Lactuca sativa]		remorin-like isoform X1 [Lactuca sativa]	N-Term(iTRAQ8plex); K11(iTRAQ8plex); T17(Phospho); K22(iTRAQ8plex)	0	S(15): 50.0; T(17): 50.0; T(21): 0.0	130.04	10.87	4	14.4909	3282.77	2.08004	1.16597	1.11909	0.945238	1.07677	1.01517	0.77709	0.968213	0.920156	1.1702	0.188969
aAGGNDEDDDsDksksEVNNEEDEEGsDEDEDDD	2	XP_023772577.1	high mobility group B protein 3-like [Lactuca sativa]		high mobility group B protein 3-like [Lactuca sativa]	N-Term(iTRAQ8plex); S11(Phospho); K13(iTRAQ8plex); S14(Phospho); K15(iTRAQ8plex); S16(Phospho); S27(Phospho)	2	S(11): 100.0; S(14): 100.0; S(16): 100.0; S(27): 100.0	102.648	33.08	3	0.032696	4907.79	0.315825	0.959688	0.971544	0.833865	0.921699	1.02655	0.953281	1.22988	1.0699	0.86148	0.189006
sTIFLATSEtEsQEAPk	8	PLY96052.1	hypothetical protein LSAT_8X16621 [Lactuca sativa]		hypothetical protein LSAT_8X16621 [Lactuca sativa]	N-Term(iTRAQ8plex); T10(Phospho); S12(Phospho); K17(iTRAQ8plex)	0	S(1): 0.0; T(2): 0.0; T(7): 50.0; S(8): 50.0; T(10): 50.0; S(12): 50.0	88.8751	17.73	3	2.74571	2607.25	3.254	0.983477	0.967109	1.00516	0.985247	1.01999	1.01125	0.990723	1.00732	0.978086	0.190575
aVEADEPEEVEEEEEDsEDEk	1	XP_023746151.1	RNA polymerase II transcriptional coactivator KELP [Lactuca sativa]		RNA polymerase II transcriptional coactivator KELP [Lactuca sativa]	N-Term(iTRAQ8plex); S17(Phospho); K21(iTRAQ8plex)	0	S(17): 100.0	148.096	28.17	3	0.16856	3124.34	0.581547	1.05399	0.952755	1.13211	1.04628	0.960834	0.937254	0.986643	0.961577	1.08809	0.190765
vSMMMPEVIEQtGsSDDFQEASSk	3	XP_023731842.1	ubinuclein-1-like isoform X2 [Lactuca sativa]		ubinuclein-1-like isoform X2 [Lactuca sativa]	N-Term(iTRAQ8plex); T12(Phospho); S14(Phospho); K24(iTRAQ8plex)	0	S(2): 0.1; T(12): 66.4; S(14): 66.4; S(15): 66.4; S(22): 0.7; S(23): 0.1	71.1737	12.4	3	9.33939	3401.49	1.29407	0.788164	0.97925	0.968514	0.911976	1.22146	0.899209	1.17049	1.09705	0.831296	0.190831
fSTNssDsDDAVQDk	1	XP_023733586.1	lysine-specific demethylase REF6 [Lactuca sativa]		lysine-specific demethylase REF6 [Lactuca sativa]	N-Term(iTRAQ8plex); S5(Phospho); S6(Phospho); S8(Phospho); K15(iTRAQ8plex)	0	S(2): 1.0; T(3): 12.3; S(5): 95.4; S(6): 95.6; S(8): 95.6	109.311	21.56	2	0.305477	2463.99	2.03961	0.99411	1.00327	0.922686	0.973356	1.03917	1.07981	0.981483	1.03349	0.941817	0.190979
lPTPTATFPAVVNsEEDDsDNEFLR	2	XP_023751399.1	uncharacterized protein LOC111899783 [Lactuca sativa]		uncharacterized protein LOC111899783 [Lactuca sativa]	N-Term(iTRAQ8plex); S14(Phospho); S19(Phospho)	0	T(3): 0.0; T(5): 0.1; T(7): 8.5; S(14): 92.2; S(19): 99.3	88.2769	7.84	3	25.5782	3228.42	-3.10261	0.960644	0.971348	0.939337	0.95711	1.06148	0.942103	1.13455	1.04604	0.91498	0.192921
eEGVTAEssEDGNESk	1	XP_023768171.1	protein EMBRYO DEFECTIVE 514 [Lactuca sativa]		protein EMBRYO DEFECTIVE 514 [Lactuca sativa]	N-Term(iTRAQ8plex); S8(Phospho); S9(Phospho); K16(iTRAQ8plex)	0	T(5): 7.2; S(8): 64.3; S(9): 64.3; S(15): 64.3	77.8836	10.14	3	5.42236	2436.01	-9.78768	0.875758	0.955457	1.0192	0.95014	1.13844	1.103	0.946489	1.06264	0.894129	0.193725
sFDELsDDELYEDsE	1	XP_023758214.1	eukaryotic peptide chain release factor subunit 1-3 [Lactuca sativa]		eukaryotic peptide chain release factor subunit 1-3 [Lactuca sativa]	N-Term(iTRAQ8plex); S6(Phospho); S14(Phospho)	0	S(1): 0.0; S(6): 100.0; Y(11): 0.1; S(14): 99.9	188.553	36.34	2	0.00353056	2256.82	-5.80072	0.964351	1.04037	1.11299	1.03923	0.978447	0.935961	0.988747	0.967719	1.0739	0.193833
dALLEPsDVDDsDVsEAGQNYSDR	3	PLY70231.1	hypothetical protein LSAT_9X4601 [Lactuca sativa]		hypothetical protein LSAT_9X4601 [Lactuca sativa]	N-Term(iTRAQ8plex); S7(Phospho); S12(Phospho); S15(Phospho)	0	S(7): 100.0; S(12): 100.0; S(15): 100.0; Y(21): 0.0; S(22): 0.0	212.52	49.84	3	0.00049127	3141.22	0.279546	1.01142	1.07213	0.99336	1.02564	1.01774	0.955384	0.956556	0.976562	1.05025	0.194163
nTNQsGsDEV	1	XP_023764383.1	E3 ubiquitin-protein ligase At1g63170-like [Lactuca sativa]		E3 ubiquitin-protein ligase At1g63170-like [Lactuca sativa]	N-Term(iTRAQ8plex); S5(Phospho); S7(Phospho)	0	T(2): 0.0; S(5): 100.0; S(7): 100.0	175.403	43.25	2	0.000451859	1514.57	-1.06399	0.897022	0.81773	0.84781	0.854187	0.969044	1.55163	0.961164	1.16061	0.73598	0.194602
sMGDEPLYPIAVLIDELk	4	XP_023756079.1	serine/threonine-protein phosphatase 2A 65 kDa regulatory subunit A beta isoform-like [Lactuca sativa]		serine/threonine-protein phosphatase 2A 65 kDa regulatory subunit A beta isoform-like [Lactuca sativa]	N-Term(Acetyl); S1(Phospho); K18(iTRAQ8plex)	0	S(1): 100.0; Y(8): 0.0	261.744	47.05	2	0.00364898	2429.23	0.917146	0.854884	1.08223	0.864826	0.933979	1.0836	0.985398	1.13469	1.0679	0.874598	0.195039
eTSSSTSSNsPMQQsRPPsPVTTPHVPPPQPSySPPPIPR	1	XP_023760581.1	formin-like protein 16 [Lactuca sativa]		formin-like protein 16 [Lactuca sativa]	N-Term(iTRAQ8plex); S10(Phospho); S15(Phospho); S19(Phospho); Y33(Phospho)	0	Too many isoforms		16.55	4	5.29815	4861.13	0.252315	0.764005	1.1106	0.889254	0.921285	1.03163	1.10435	1.11609	1.08402	0.849875	0.195114
lTEVsSPsPPQLGFDNALLPLATYEDEDDEDDERDDk	2	XP_023742773.1	U4/U6.U5 tri-snRNP-associated protein 2-like [Lactuca sativa]		U4/U6.U5 tri-snRNP-associated protein 2-like [Lactuca sativa]	N-Term(iTRAQ8plex); S5(Phospho); S8(Phospho); K37(iTRAQ8plex)	1	T(2): 0.1; S(5): 52.2; S(6): 52.2; S(8): 95.3; T(23): 0.1; Y(24): 0.1	71.1004	10.49	4	25.285	4904.21	0.901	1.13268	0.984094	1.17415	1.09697	0.748807	1.10867	0.872574	0.910017	1.20544	0.195118
tSESTVVPLVNVTHEDDEsDDDFGQLAHR	27	XP_023755684.1	TOM1-like protein 4 [Lactuca sativa]		TOM1-like protein 4 [Lactuca sativa]	N-Term(iTRAQ8plex); S19(Phospho)	0	T(1): 0.0; S(2): 0.0; S(4): 0.0; T(5): 0.0; T(13): 0.0; S(19): 100.0	409.882	64.14	4	7.65753e-05	3596.63	-2.0539	0.997973	0.973267	0.992079	0.987773	1.01692	0.987008	1.04588	1.0166	0.971642	0.195254
tEMGAEGGGsPSPSPLSTSk	6	XP_023747909.1	heat shock factor-binding protein 1-like isoform X2 [Lactuca sativa]		heat shock factor-binding protein 1-like isoform X2 [Lactuca sativa]	N-Term(iTRAQ8plex); S10(Phospho); K20(iTRAQ8plex)	0	T(1): 0.0; S(10): 100.0; S(12): 0.0; S(14): 0.0; S(17): 0.0; T(18): 0.0; S(19): 0.0	329.534	69.73	3	1.7835e-05	2565.23	-2.60476	1.0675	0.998394	1.09066	1.05218	0.980651	0.943322	1.04418	0.989383	1.06347	0.19533
rDEEmPTSQtPPYsPk	1	XP_023763234.1	UDP-glucuronic acid decarboxylase 1 [Lactuca sativa]		UDP-glucuronic acid decarboxylase 1 [Lactuca sativa]	N-Term(iTRAQ8plex); M5(Oxidation); T10(Phospho); S14(Phospho); K16(iTRAQ8plex)	1	T(7): 0.1; S(8): 0.1; T(10): 99.8; Y(13): 0.1; S(14): 99.9	274.574	10.57	3	11.0283	2647.19	-1.99781	1.03262	0.881184	0.986801	0.966867	1.00645	1.05792	1.06023	1.04153	0.928312	0.19592
sDSDDDELLQMALk	4	XP_023748778.1	exocyst complex component SEC5A-like isoform X2 [Lactuca sativa]		exocyst complex component SEC5A-like isoform X2 [Lactuca sativa]	N-Term(Acetyl); S1(Phospho); K14(iTRAQ8plex)	0	S(1): 99.9; S(3): 0.1	166.607	33.61	2	0.0325545	2005.9	-0.457175	1.00038	0.86973	0.999583	0.956565	1.10451	1.00056	1.01619	1.04042	0.919401	0.196402
aLsASPEEETcEITVsPLPsPk	1	PLY71078.1	hypothetical protein LSAT_2X85241 [Lactuca sativa]		hypothetical protein LSAT_2X85241 [Lactuca sativa]	N-Term(iTRAQ8plex); S3(Phospho); C11(Carbamidomethyl); S16(Phospho); S20(Phospho); K22(iTRAQ8plex)	0	S(3): 0.1; S(5): 99.9; T(10): 0.0; T(14): 0.0; S(16): 100.0; S(20): 100.0	399.819	53.49	3	0.00082424	3190.44	-2.61187	0.967758	1.02349	0.928221	0.973155	1.08794	1.01152	1.00082	1.03342	0.941681	0.196573
lNLDRssGDDsMEEDVQESk	6	XP_023757999.1	formin-like protein 5 [Lactuca sativa]		formin-like protein 5 [Lactuca sativa]	N-Term(iTRAQ8plex); S6(Phospho); S7(Phospho); S11(Phospho); K20(iTRAQ8plex)	1	S(6): 100.0; S(7): 100.0; S(11): 100.0; S(19): 0.0	224.122	33.98	3	0.036175	3102.29	-0.339823	0.978841	0.974191	0.986213	0.979748	1.04464	0.967864	1.06205	1.02485	0.955992	0.196639
lVSSSFPIAVFPSSSSssPSFR	7	XP_023747325.1	uncharacterized protein LOC111895474 [Lactuca sativa]		uncharacterized protein LOC111895474 [Lactuca sativa]	N-Term(iTRAQ8plex); S17(Phospho); S18(Phospho)	0	S(3): 0.0; S(4): 0.0; S(5): 0.0; S(13): 0.3; S(14): 0.3; S(15): 0.3; S(16): 0.3; S(17): 98.8; S(18): 95.5; S(20): 4.6	232.761	31.22	3	0.125874	2737.29	3.89434	1.06759	0.916288	0.934002	0.972626	1.03304	1.06416	1.04591	1.0477	0.928343	0.197303
fYMEPDtSDsGSMISGAAGGR	37	XP_023739101.1	protein argonaute 1-like [Lactuca sativa]		protein argonaute 1-like [Lactuca sativa]	N-Term(iTRAQ8plex); T7(Phospho); S10(Phospho)	0	Y(2): 0.0; T(7): 97.2; S(8): 2.8; S(10): 100.0; S(12): 0.0; S(15): 0.0	396.426	68.04	2	8.09522e-06	2600.04	1.73894	0.931695	0.933144	1.05504	0.973292	1.04115	1.05612	1.01861	1.03863	0.937095	0.197373
sISSYDPYDVVGtSSEDGyIGVSk	5	XP_023733417.1	CLIP-associated protein-like isoform X2 [Lactuca sativa]		CLIP-associated protein-like isoform X2 [Lactuca sativa]	N-Term(iTRAQ8plex); T13(Phospho); Y19(Phospho); K24(iTRAQ8plex)	0	S(1): 0.0; S(3): 0.0; S(4): 0.1; Y(5): 0.1; Y(8): 2.1; T(13): 34.4; S(14): 34.4; S(15): 34.4; Y(19): 94.4; S(23): 0.0	91.484	14.63	3	6.58397	3293.5	-0.873782	1.02085	1.11455	0.983278	1.03956	0.900032	0.991801	0.995721	0.962518	1.08004	0.198283
gRsPsPR	1	XP_023754846.1;PLY95693.1	serine/arginine-rich SC35-like splicing factor SCL30A [Lactuca sativa]		serine/arginine-rich SC35-like splicing factor SCL30A [Lactuca sativa]	N-Term(iTRAQ8plex); S3(Phospho); S5(Phospho)	1	S(3): 100.0; S(5): 100.0	101.997	23.62	3	0.14643	1220.55	-2.4051	1.02925	0.821195	0.93099	0.927144	1.24677	1.04928	0.962382	1.08614	0.85361	0.198911
gNtSAQDVHSVPDLER	9	XP_023759138.1	mediator of RNA polymerase II transcription subunit 15 [Lactuca sativa]		mediator of RNA polymerase II transcription subunit 15 [Lactuca sativa]	N-Term(iTRAQ8plex); T3(Phospho)	0	T(3): 50.0; S(4): 50.0; S(10): 0.0	165.213	18.93	3	1.39517	2108.99	0.158453	1.01737	1.04216	0.984401	1.01464	0.963267	0.917382	1.01381	0.964821	1.05164	0.199897
rDsGNsLQsssDIsDDEGLGk	2	XP_023772378.1	phototropin-1 isoform X2 [Lactuca sativa]		phototropin-1 isoform X2 [Lactuca sativa]	N-Term(iTRAQ8plex); S3(Phospho); S6(Phospho); S9(Phospho); S10(Phospho); S11(Phospho); S14(Phospho); K21(iTRAQ8plex)	1	S(3): 100.0; S(6): 100.0; S(9): 100.0; S(10): 100.0; S(11): 100.0; S(14): 100.0	228.155	12.84	3	1.15439	3255.18	-0.982557	1.13226	1.05853	0.943256	1.04468	0.91873	0.932752	1.00305	0.951511	1.09792	0.200606
fYMEPDTsDSGsMTSGR	50	XP_023772276.1	protein argonaute 1-like [Lactuca sativa]		protein argonaute 1-like [Lactuca sativa]	N-Term(iTRAQ8plex); S8(Phospho); S12(Phospho)	0	Y(2): 0.0; T(7): 0.1; S(8): 99.9; S(10): 2.3; S(12): 97.6; T(14): 0.1; S(15): 0.0	331.416	56.81	2	5.00278e-05	2331.89	0.684934	1.05797	1.01381	1.03932	1.03704	1.04714	0.964211	0.936037	0.982464	1.05555	0.201288
eEGIsSsGDPLLFR	3	XP_023741679.1	uncharacterized protein LOC111889758 [Lactuca sativa]		uncharacterized protein LOC111889758 [Lactuca sativa]	N-Term(iTRAQ8plex); S5(Phospho); S7(Phospho)	0	S(5): 51.0; S(6): 51.0; S(7): 98.1	153.2	12.4	2	4.28415	1970.89	2.45414	0.997147	1.076	1.05817	1.04377	0.912344	1.058	0.91663	0.962323	1.08464	0.202407
sAsWVc	3	XP_023740638.1	probable alkaline/neutral invertase D [Lactuca sativa]		probable alkaline/neutral invertase D [Lactuca sativa]	N-Term(iTRAQ8plex); S3(Phospho); C6(Carbamidomethyl)	0	S(1): 0.0; S(3): 100.0	147.882	31.53	2	0.00632765	1093.47	-1.1754	1.03588	1.00757	1.0851	1.04285	0.924578	1.03786	0.984386	0.982276	1.06167	0.202625
gWsEsEEDEPEk	5	XP_023744283.1	protein CTR9 homolog [Lactuca sativa]		protein CTR9 homolog [Lactuca sativa]	N-Term(iTRAQ8plex); S3(Phospho); S5(Phospho); K12(iTRAQ8plex)	0	S(3): 100.0; S(5): 100.0	263.024	28.31	2	0.0797619	2189.91	-1.95984	1.01383	1.05911	1.00628	1.02641	0.988276	0.969943	1.02018	0.992801	1.03385	0.2027
dYLGsPNSEEDySIFDQVTk	8	XP_023767913.1	B3 domain-containing protein Os01g0234100-like isoform X1 [Lactuca sativa]		B3 domain-containing protein Os01g0234100-like isoform X1 [Lactuca sativa]	N-Term(iTRAQ8plex); S5(Phospho); Y12(Phospho); K20(iTRAQ8plex)	0	Y(2): 1.3; S(5): 99.2; S(8): 98.0; Y(12): 0.8; S(13): 0.8; T(19): 0.0	63.5955	13.5	3	6.76279	3075.38	1.70773	0.986027	0.946534	0.925238	0.9526	1.17656	0.952356	1.03784	1.05558	0.902438	0.202911
sGsEGSsGHSGGAPAk	4	XP_023731312.1	integrin-linked protein kinase 1-like [Lactuca sativa]		integrin-linked protein kinase 1-like [Lactuca sativa]	N-Term(Acetyl); S1(Phospho); S3(Phospho); S7(Phospho); K16(iTRAQ8plex)	0	S(1): 99.2; S(3): 92.2; S(6): 8.9; S(7): 49.8; S(10): 49.8	67.6786	17.41	3	0.273235	1958.72	-2.00516	0.878779	1.03463	0.939459	0.950956	1.15195	1.04861	0.968012	1.05619	0.900363	0.206833
lEEEFsDsENDLQDLSQk	16	XP_023754585.1	DNA-binding protein RHL1 [Lactuca sativa]		DNA-binding protein RHL1 [Lactuca sativa]	N-Term(iTRAQ8plex); S6(Phospho); S8(Phospho); K18(iTRAQ8plex)	0	S(6): 100.0; S(8): 100.0; S(16): 0.0	326.303	69.76	3	1.40557e-05	2894.28	0.17616	1.02033	1.02318	0.993752	1.01242	1.01338	0.952042	0.981386	0.982271	1.03069	0.206883
aNsDsGsDYRPk	1	XP_023759965.1	uncharacterized protein LOC111908370 [Lactuca sativa]		uncharacterized protein LOC111908370 [Lactuca sativa]	N-Term(iTRAQ8plex); S3(Phospho); S5(Phospho); S7(Phospho); K12(iTRAQ8plex)	0	S(3): 100.0; S(5): 99.9; S(7): 99.9; Y(9): 0.2	155.516	38.08	2	0.0074064	2144.88	-4.25041	0.86535	1.03402	0.884005	0.927791	1.22775	1.09815	0.922589	1.08283	0.856823	0.207758
sDGIPsEANsPR	1	XP_023770744.1	PH, RCC1 and FYVE domains-containing protein 1-like [Lactuca sativa]		PH, RCC1 and FYVE domains-containing protein 1-like [Lactuca sativa]	N-Term(iTRAQ8plex); S6(Phospho); S10(Phospho)	0	S(1): 0.0; S(6): 100.0; S(10): 100.0	113.821	10.24	2	2.66366	1693.72	1.03229	1.04244	1.01539	1.13601	1.06462	1.04868	0.977174	0.811469	0.945774	1.12566	0.207819
tFGATPTtADsGEtssssSSDSDNDEIPR	5	XP_023768412.1	phospholipase A1-IIdelta [Lactuca sativa]		phospholipase A1-IIdelta [Lactuca sativa]	N-Term(iTRAQ8plex); T8(Phospho); S11(Phospho); T14(Phospho); S15(Phospho); S16(Phospho); S17(Phospho); S18(Phospho)	0	Too many isoforms		0.79	3	37.3072	3783.2	0.777785	1.05764	0.854652	0.876623	0.929639	1.00485	1.23321	1.00122	1.07976	0.860967	0.208146
aDIsPLVLsDEDsMGSk	1	XP_023751925.1	uncharacterized protein LOC111900276 [Lactuca sativa]		uncharacterized protein LOC111900276 [Lactuca sativa]	N-Term(iTRAQ8plex); S4(Phospho); S9(Phospho); S13(Phospho); K17(iTRAQ8plex)	0	S(4): 100.0; S(9): 51.0; S(13): 98.0; S(16): 51.0	172.1	23.55	3	0.394764	2612.13	-5.84332	1.13808	0.987852	1.01388	1.0466	1.02989	0.923767	0.924113	0.959255	1.09106	0.208258
ksPAPDSATPNPAAVADQEcVPVSsQ	1	XP_023757585.1	BRISC and BRCA1-A complex member 1 [Lactuca sativa]		BRISC and BRCA1-A complex member 1 [Lactuca sativa]	K1(iTRAQ8plex); N-Term(iTRAQ8plex); S2(Phospho); C20(Carbamidomethyl); S25(Phospho)	1	S(2): 99.1; S(7): 0.4; T(9): 0.4; S(24): 50.0; S(25): 50.0	118.559	22.28	3	1.32303	3391.57	-1.40357	0.959419	1.02547	1.29554	1.09348	0.796142	0.940087	1.00563	0.913955	1.19643	0.208965
yLsPNLsDPANR	1	XP_023771928.1	autophagy-related protein 13a [Lactuca sativa]		autophagy-related protein 13a [Lactuca sativa]	N-Term(iTRAQ8plex); S3(Phospho); S7(Phospho)	0	Y(1): 0.0; S(3): 100.0; S(7): 100.0	193.646	17.36	2	1.15886	1810.81	0.0318627	1.1384	0.961727	1.04439	1.04817	1.01392	0.902101	0.957625	0.957883	1.09426	0.209199
dLIDQIPLQsPFGsPPk	3	XP_023770744.1	PH, RCC1 and FYVE domains-containing protein 1-like [Lactuca sativa]		PH, RCC1 and FYVE domains-containing protein 1-like [Lactuca sativa]	N-Term(iTRAQ8plex); S10(Phospho); S14(Phospho); K17(iTRAQ8plex)	0	S(10): 100.0; S(14): 100.0	212.861	37.05	3	0.0390934	2620.32	-4.60321	1.03148	1.0992	0.98816	1.03962	0.992668	1.01349	0.908539	0.971565	1.07004	0.209357
iDEHDQsDEEVGEIR	5	XP_023756187.1	U1 small nuclear ribonucleoprotein 70 kDa-like [Lactuca sativa]		U1 small nuclear ribonucleoprotein 70 kDa-like [Lactuca sativa]	N-Term(iTRAQ8plex); S7(Phospho)	0	S(7): 100.0	216.117	24.78	3	0.226707	2154.94	-2.16013	0.887498	0.886384	1.07578	0.949886	1.05005	1.04106	1.04098	1.04403	0.909827	0.209504
eEETEsGDEPtSSGNEAAEEk	3	XP_023763875.1	inactive leucine-rich repeat receptor-like serine/threonine-protein kinase At1g60630 [Lactuca sativa]		inactive leucine-rich repeat receptor-like serine/threonine-protein kinase At1g60630 [Lactuca sativa]	N-Term(iTRAQ8plex); S6(Phospho); T11(Phospho); K21(iTRAQ8plex)	0	T(4): 0.4; S(6): 5.5; T(11): 64.7; S(12): 64.7; S(13): 64.7	85.5572	9.25	3	9.1277	2993.22	-1.49814	0.974485	0.987733	0.833777	0.931999	1.23376	1.04848	0.948282	1.07684	0.865495	0.20987
tLFPWHNtmQFsLTR	1	XP_023769332.1	F-actin-capping protein subunit alpha [Lactuca sativa]		F-actin-capping protein subunit alpha [Lactuca sativa]	N-Term(iTRAQ8plex); T8(Phospho); M9(Oxidation); S12(Phospho)	0	T(1): 0.0; T(8): 99.4; S(12): 93.0; T(14): 7.6	64.4809	9.54	3	11.5398	2359.06	-2.26948	1.05264	1.09126	1.07332	1.07241	1.03944	1.01358	0.755445	0.936157	1.14554	0.210084
lSsAPssVsSEGIDDQTcEEPk	1	XP_023749608.1	uncharacterized protein LOC111897890 [Lactuca sativa]		uncharacterized protein LOC111897890 [Lactuca sativa]	N-Term(iTRAQ8plex); S3(Phospho); S6(Phospho); S7(Phospho); S9(Phospho); C18(Carbamidomethyl); K22(iTRAQ8plex)	0	S(2): 9.3; S(3): 90.6; S(6): 49.8; S(7): 49.8; S(9): 2.8; S(10): 98.8; T(17): 98.8	74.6556	9.56	3	8.02302	3251.3	-0.397969	0.867118	0.990084	0.939768	0.932323	1.18629	1.15934	0.895641	1.08042	0.862925	0.210304
fQGPtPsPELVk	1	XP_023731214.1	uncharacterized protein LOC111878985 [Lactuca sativa]		uncharacterized protein LOC111878985 [Lactuca sativa]	N-Term(iTRAQ8plex); T5(Phospho); S7(Phospho); K12(iTRAQ8plex)	0	T(5): 100.0; S(7): 100.0	191.44	22.11	3	0.831719	2068.03	-1.57361	1.12824	0.99739	1.0168	1.04748	0.966512	0.870729	1.02981	0.955683	1.09605	0.210705
vGPDIPssADPTSQPsPA	2	XP_023746724.1	probable LRR receptor-like serine/threonine-protein kinase At4g36180 [Lactuca sativa]		probable LRR receptor-like serine/threonine-protein kinase At4g36180 [Lactuca sativa]	N-Term(iTRAQ8plex); S7(Phospho); S8(Phospho); S16(Phospho)	0	S(7): 91.5; S(8): 91.5; T(12): 9.1; S(13): 8.5; S(16): 99.3	76.9832	10.29	2	4.01289	2266.92	0.165361	0.888809	0.903033	0.939935	0.910593	0.975388	1.35221	0.971313	1.09964	0.828085	0.211443
vEDAsPDGR	1	XP_023741696.1	clathrin interactor EPSIN 2-like isoform X2 [Lactuca sativa]		clathrin interactor EPSIN 2-like isoform X2 [Lactuca sativa]	N-Term(iTRAQ8plex); S5(Phospho)	0	S(5): 100.0	131.025	11.02	2	1.91344	1329.6	-0.94649	0.951994	1.00079	0.871794	0.941526	1.13195	0.917375	1.13941	1.06291	0.8858	0.21262
fWSNQADsEtEsEVSDyEQDDVNEGQEDATNAPDR	14	XP_023732798.1	eukaryotic translation initiation factor 3 subunit C-like [Lactuca sativa]		eukaryotic translation initiation factor 3 subunit C-like [Lactuca sativa]	N-Term(iTRAQ8plex); S8(Phospho); T10(Phospho); S12(Phospho); Y17(Phospho)	0	S(3): 0.0; S(8): 99.6; T(10): 94.1; S(12): 94.1; S(15): 18.3; Y(17): 94.1; T(30): 0.0	220.234	78.26	3	9.12844e-07	4601.66	-2.75857	0.847785	0.979219	1.11865	0.981883	1.06507	1.15703	1.09137	1.10449	0.888992	0.212983
aAsTssSVEEVEMVk	3	XP_023743704.1	ubiquitin-like-specific protease ESD4 [Lactuca sativa]		ubiquitin-like-specific protease ESD4 [Lactuca sativa]	N-Term(iTRAQ8plex); S3(Phospho); S5(Phospho); S6(Phospho); K15(iTRAQ8plex)	0	S(3): 95.4; T(4): 9.1; S(5): 65.2; S(6): 65.2; S(7): 65.2	96.0229	19.58	2	0.906567	2402.05	1.04381	0.98097	0.946022	1.01845	0.981815	1.02756	0.988144	1.06189	1.02587	0.957059	0.214115
sVsQALESAk	2	XP_023744529.1	protein IQ-DOMAIN 32 [Lactuca sativa]		protein IQ-DOMAIN 32 [Lactuca sativa]	N-Term(iTRAQ8plex); S3(Phospho); K10(iTRAQ8plex)	0	S(1): 1.8; S(3): 98.2; S(8): 0.0	198.103	14.01	3	4.41677	1707.9	-5.25905	1.04204	0.98752	1.11901	1.04952	1.0151	0.858869	0.998146	0.957371	1.09625	0.21429
vEPQTDsPAPAGAQtDSPAPsPYQVLPk	6	XP_023772251.1	HMG-Y-related protein B-like [Lactuca sativa]		HMG-Y-related protein B-like [Lactuca sativa]	N-Term(iTRAQ8plex); S7(Phospho); T15(Phospho); S21(Phospho); K28(iTRAQ8plex)	0	T(5): 5.1; S(7): 94.8; T(15): 50.1; S(17): 50.1; S(21): 50.0; Y(23): 50.0	102.817	18.88	3	3.19213	3696.71	-0.223661	1.14426	1.09229	0.934461	1.057	0.978365	0.995245	0.864415	0.946008	1.11733	0.214389
tLSDLNRPTANDsDsDsDGPQEYYTGGEk	13	XP_023742781.1	plant UBX domain-containing protein 4-like [Lactuca sativa]		plant UBX domain-containing protein 4-like [Lactuca sativa]	N-Term(iTRAQ8plex); S13(Phospho); S15(Phospho); S17(Phospho); K29(iTRAQ8plex)	0	T(1): 0.0; S(3): 0.0; T(9): 0.0; S(13): 100.0; S(15): 100.0; S(17): 100.0; Y(23): 0.0; Y(24): 0.0; T(25): 0.0	310.653	30.89	3	0.101105	3980.64	-5.47373	0.988692	1.04075	0.92753	0.985658	1.05706	1.00063	1.07393	1.04387	0.944234	0.21474
gREEGVVssDEFsDEER	2	XP_023747445.1	uncharacterized protein LOC111895595 [Lactuca sativa]		uncharacterized protein LOC111895595 [Lactuca sativa]	N-Term(iTRAQ8plex); S8(Phospho); S9(Phospho); S13(Phospho)	1	S(8): 100.0; S(9): 100.0; S(13): 100.0	170.412	15.75	3	0.679815	2470.93	-1.27728	1.11726	0.977287	1.04665	1.04707	0.996224	1.00954	0.868133	0.957965	1.09301	0.215043
aEDMGGLPEEQsSDEELtEDEyDsGDDDMAAGPVDP	10	XP_023730819.1	ubiquitin-conjugating enzyme E2-23 kDa-like isoform X1 [Lactuca sativa]		ubiquitin-conjugating enzyme E2-23 kDa-like isoform X1 [Lactuca sativa]	N-Term(iTRAQ8plex); S12(Phospho); T18(Phospho); Y22(Phospho); S24(Phospho)	0	S(12): 56.3; S(13): 56.3; T(18): 95.8; Y(22): 95.8; S(24): 95.8	102.282	34.66	3	0.0219209	4439.53	-2.47342	1.00407	1.59875	0.814738	1.13919	0.818936	0.823112	0.722777	0.788275	1.44517	0.215098
sGSEGsSGHSAGDAPVPAPAVGk	8	XP_023757821.1	integrin-linked protein kinase 1-like [Lactuca sativa]		integrin-linked protein kinase 1-like [Lactuca sativa]	N-Term(Acetyl); S1(Phospho); S6(Phospho); K23(iTRAQ8plex)	0	S(1): 99.8; S(3): 0.4; S(6): 95.6; S(7): 0.2; S(10): 4.0	169.596	20.59	3	0.739843	2528.1	-1.69078	1.00461	1.01775	1.11989	1.04742	0.99776	1.0168	0.868877	0.961146	1.08976	0.217777
fQDSSLGEGGQsPLMPTIDNk	1	XP_023736728.1	homeobox-DDT domain protein RLT1 [Lactuca sativa]		homeobox-DDT domain protein RLT1 [Lactuca sativa]	N-Term(iTRAQ8plex); S12(Phospho); K21(iTRAQ8plex)	0	S(4): 0.1; S(5): 0.1; S(12): 99.8; T(17): 0.0	123.283	12.16	3	13.1661	2909.43	3.22947	1.00818	0.910568	0.971184	0.96331	1.09315	1.10207	0.947233	1.04748	0.919644	0.218345
sRPSAGsSSYEGYGSPISEEPPPySSPVHQR	2	PLY98452.1	hypothetical protein LSAT_1X6680 [Lactuca sativa]		hypothetical protein LSAT_1X6680 [Lactuca sativa]	N-Term(iTRAQ8plex); S7(Phospho); Y24(Phospho)	0	S(1): 0.1; S(4): 3.1; S(7): 87.2; S(8): 3.1; S(9): 3.1; Y(10): 0.1; Y(13): 0.1; S(15): 3.1; S(18): 0.0; Y(24): 3.3; S(25): 3.3; S(26): 93.3	178.191	17.04	3	3.9915	3756.65	-0.993069	0.900304	0.847352	1.04623	0.931294	1.08133	0.936659	1.17615	1.06471	0.87469	0.218832
dVEAVsQEssGsGATLGESLR	5	XP_023746600.1	E3 ubiquitin-protein ligase UPL2-like [Lactuca sativa]		E3 ubiquitin-protein ligase UPL2-like [Lactuca sativa]	N-Term(iTRAQ8plex); S6(Phospho); S9(Phospho); S10(Phospho); S12(Phospho)	0	S(6): 100.0; S(9): 100.0; S(10): 100.0; S(12): 100.0; T(15): 0.0; S(19): 0.0	218.692	50.88	3	0.000326633	2703.05	-1.92627	1.02792	0.9707	1.09689	1.03184	0.978176	1.00161	0.93526	0.971684	1.06191	0.219254
eVssAETTEIGENk	1	XP_023735176.1	titin isoform X2 [Lactuca sativa]		titin isoform X2 [Lactuca sativa]	N-Term(iTRAQ8plex); S3(Phospho); S4(Phospho); K14(iTRAQ8plex)	0	S(3): 100.0; S(4): 100.0; T(7): 0.0; T(8): 0.0	133.566	5.09	3	27.7993	2262.03	-3.86341	1.02019	0.950207	1.22823	1.06621	0.922176	0.964055	0.94516	0.943797	1.1297	0.220403
mVNsmGPNITPTSYFQPMTPTTPySSAPPk	2	PLY80347.1	hypothetical protein LSAT_7X91460 [Lactuca sativa]		hypothetical protein LSAT_7X91460 [Lactuca sativa]	N-Term(Acetyl); M1(Oxidation); S4(Phospho); M5(Oxidation); Y24(Phospho); K30(iTRAQ8plex)	0	S(4): 18.2; T(10): 18.2; T(12): 18.2; S(13): 18.2; Y(14): 18.2; T(19): 18.2; T(21): 18.2; T(22): 18.2; Y(24): 18.2; S(25): 18.2; S(26): 18.2	18.3963	5.81	3	49.1123	3780.66	0.176405	0.867966	0.864306	0.915533	0.882602	1.43754	0.850432	1.1034	1.13046	0.780747	0.220409
lPSPSIsPsPsLPPsPSLPIVAAEk	23	XP_023744762.1	myosin-9 [Lactuca sativa]		myosin-9 [Lactuca sativa]	N-Term(iTRAQ8plex); S7(Phospho); S9(Phospho); S11(Phospho); S15(Phospho); K25(iTRAQ8plex)	0	S(3): 94.1; S(5): 6.5; S(7): 11.1; S(9): 94.1; S(11): 94.1; S(15): 99.6; S(17): 0.4	186.485	20.96	3	2.06192	3396.64	0.756757	0.913139	1.0026	0.945491	0.953742	1.0603	0.943362	1.06437	1.02268	0.932594	0.220485
vPsPVPtPIGGGR	1	XP_023758838.1	pumilio homolog 1-like [Lactuca sativa]		pumilio homolog 1-like [Lactuca sativa]	N-Term(iTRAQ8plex); S3(Phospho); T7(Phospho)	0	S(3): 100.0; T(7): 100.0	210.502	20.08	2	0.627828	1697.83	-1.89166	0.859315	0.977883	1.04978	0.962325	1.05804	1.01068	1.07263	1.04712	0.919022	0.221406
ssDHQPLDEMPsPMPVALSk	1	XP_023752295.1	asparagine--tRNA ligase, cytoplasmic 2 [Lactuca sativa]		asparagine--tRNA ligase, cytoplasmic 2 [Lactuca sativa]	N-Term(Acetyl); S1(Phospho); S2(Phospho); S12(Phospho); K20(iTRAQ8plex)	0	S(1): 100.0; S(2): 100.0; S(12): 100.0; S(19): 0.0	117.349	24.91	3	0.218408	2752.13	-0.467929	1.05495	0.957942	1.12265	1.04518	0.94395	0.915155	1.02541	0.961504	1.08703	0.223178
lLsYDEFEPMcTWQR	8	XP_023767990.1	inactive protein RESTRICTED TEV MOVEMENT 2 [Lactuca sativa]		inactive protein RESTRICTED TEV MOVEMENT 2 [Lactuca sativa]	N-Term(iTRAQ8plex); S3(Phospho); C11(Carbamidomethyl)	0	S(3): 98.6; Y(4): 1.4; T(12): 0.0	282.54	35.37	2	0.0282997	2359.05	1.97513	0.973125	1.05825	1.04457	1.02532	0.929126	0.986928	1.00743	0.974494	1.05215	0.223371
vAFNDTPTAIFWtDyVATR	10	XP_023763686.1	mitogen-activated protein kinase 15-like isoform X2 [Lactuca sativa]		mitogen-activated protein kinase 15-like isoform X2 [Lactuca sativa]	N-Term(iTRAQ8plex); T13(Phospho); Y15(Phospho)	0	T(6): 0.0; T(8): 0.0; T(13): 100.0; Y(15): 100.0; T(18): 0.0	208.4	38.25	3	0.0197428	2652.2	-1.57799	1.01686	1.00599	0.989121	1.00399	1.00395	1.0262	1.03412	1.02142	0.982934	0.223389
tLsPLPLssAsSPTSGGYSDVk	4	XP_023772978.1	AT-hook motif nuclear-localized protein 1-like [Lactuca sativa]		AT-hook motif nuclear-localized protein 1-like [Lactuca sativa]	N-Term(iTRAQ8plex); S3(Phospho); S8(Phospho); S9(Phospho); S11(Phospho); K22(iTRAQ8plex)	0	Too many isoforms		11.63	3	9.31321	3079.35	-1.84175	1.04524	0.897488	0.934707	0.959144	1.08715	1.15708	0.953286	1.06584	0.899894	0.225114
qPIsFEDsPDWEEPDVEVR	1	PLY70426.1	hypothetical protein LSAT_1X63041 [Lactuca sativa]		hypothetical protein LSAT_1X63041 [Lactuca sativa]	N-Term(iTRAQ8plex); S4(Phospho); S8(Phospho)	0	S(4): 100.0; S(8): 100.0	63.6365	10.1	3	8.64855	2738.16	2.3543	1.00671	0.998335	0.944278	0.983108	0.987205	1.05385	1.02648	1.02251	0.961462	0.225312
sEtPGScTSNPsEYYNILAk	1	XP_023752034.1	uncharacterized protein LOC111900379 [Lactuca sativa]		uncharacterized protein LOC111900379 [Lactuca sativa]	N-Term(iTRAQ8plex); T3(Phospho); C7(Carbamidomethyl); S12(Phospho); K20(iTRAQ8plex)	0	S(1): 0.5; T(3): 93.4; S(6): 35.3; T(8): 35.3; S(9): 35.3; S(12): 0.2; Y(14): 0.0; Y(15): 0.0	77.2518	13.31	3	6.2649	2986.33	-2.08206	1.05952	1.05346	0.999175	1.03738	1.05685	0.918591	0.928679	0.968039	1.07163	0.225683
aAVDEDDDsDVDLFGEEtEEEk	1	XP_023729654.1	elongation factor 1-delta-like [Lactuca sativa]		elongation factor 1-delta-like [Lactuca sativa]	N-Term(iTRAQ8plex); S9(Phospho); T18(Phospho); K22(iTRAQ8plex)	0	S(9): 100.0; T(18): 100.0	112.071	23.29	3	0.436465	3225.33	-3.03193	0.959586	1.13245	1.11082	1.06762	0.830977	1.07707	0.905072	0.937707	1.13854	0.226325
aAAtFSANSPSYTPLk	1	PLY97959.1	hypothetical protein LSAT_3X13701 [Lactuca sativa]		hypothetical protein LSAT_3X13701 [Lactuca sativa]	N-Term(Acetyl); T4(Phospho); K16(iTRAQ8plex)	0	T(4): 96.4; S(6): 3.6; S(9): 0.0; S(11): 0.0; Y(12): 0.0; T(13): 0.0	146.618	17.11	2	2.36264	2051.99	-2.59904	0.98238	1.01983	0.962626	0.988278	1.04058	1.01751	0.996468	1.01818	0.970627	0.228646
sFDAENYGR	2	PLY62499.1	hypothetical protein LSAT_1X71440 [Lactuca sativa]		hypothetical protein LSAT_1X71440 [Lactuca sativa]	N-Term(iTRAQ8plex); S1(Phospho)	0	S(1): 100.0; Y(7): 0.0	188.741	13.62	2	1.05586	1442.62	-2.76215	1.02396	1.02841	1.0611	1.03782	0.937145	0.897471	1.06218	0.965598	1.0748	0.229602
aSSAAsAsPPATLR	4	PLY89942.1	hypothetical protein LSAT_4X2860 [Lactuca sativa]		hypothetical protein LSAT_4X2860 [Lactuca sativa]	N-Term(iTRAQ8plex); S6(Phospho); S8(Phospho)	0	S(2): 0.0; S(3): 0.0; S(6): 99.9; S(8): 99.9; T(12): 0.3	168.78	21.32	2	0.508047	1750.81	-0.675692	0.993659	1.00713	1.07676	1.02585	0.995565	0.950692	1.00319	0.983148	1.04343	0.234303
vSPDsGyAsSNEGAPAAk	6	XP_023762691.1	protein BTR1-like isoform X2 [Lactuca sativa]		protein BTR1-like isoform X2 [Lactuca sativa]	N-Term(iTRAQ8plex); S5(Phospho); Y7(Phospho); S9(Phospho); K18(iTRAQ8plex)	0	S(2): 0.7; S(5): 97.4; Y(7): 67.3; S(9): 67.3; S(10): 67.3	78.3504	4.07	3	31.5744	2556.09	-0.474935	1.16495	0.906874	1.11186	1.06123	0.915741	0.919998	0.999388	0.945043	1.12294	0.235327
nDQGFIEPWVcsSD	3	XP_023737096.1	uncharacterized protein LOC111885035 [Lactuca sativa]		uncharacterized protein LOC111885035 [Lactuca sativa]	N-Term(iTRAQ8plex); C11(Carbamidomethyl); S12(Phospho)	0	S(12): 2.4; S(13): 97.6	119.871	22.05	2	0.326525	2037.85	-4.00813	1.13973	1.01082	1.00295	1.05117	0.927696	0.857769	1.05921	0.948225	1.10856	0.235755
kETTDAEEEVDDVIAPDstDEEVTAVEA	6	XP_023771243.1	DNA repair protein recA homolog 3, mitochondrial isoform X2 [Lactuca sativa]		DNA repair protein recA homolog 3, mitochondrial isoform X2 [Lactuca sativa]	K1(iTRAQ8plex); N-Term(iTRAQ8plex); S18(Phospho); T19(Phospho)	1	T(3): 0.0; T(4): 0.0; S(18): 66.7; T(19): 66.7; T(24): 66.7	89.8609	24.59	3	0.67144	3775.67	-1.42831	1.0261	1.06835	1.14956	1.08134	1.11419	0.733344	0.912615	0.920049	1.1753	0.23615
tSSLNAssDDENEGFAsGEEEAFETNLDENSk	10	XP_023771882.1	translocase of chloroplast 159, chloroplastic [Lactuca sativa]		translocase of chloroplast 159, chloroplastic [Lactuca sativa]	N-Term(iTRAQ8plex); S7(Phospho); S8(Phospho); S17(Phospho); K32(iTRAQ8plex)	0	T(1): 0.2; S(2): 0.2; S(3): 0.2; S(7): 99.8; S(8): 99.7; S(17): 99.3; T(25): 0.6; S(31): 0.0	149.122	57.26	3	0.000209826	4271.72	1.13172	1.03968	1.02355	1.04875	1.03733	0.925889	1.02796	1.019	0.990951	1.0468	0.237937
iAAAAsT	3	XP_023761837.1	60S ribosomal protein L37-1-like [Lactuca sativa]		60S ribosomal protein L37-1-like [Lactuca sativa]	N-Term(iTRAQ8plex); S6(Phospho)	0	S(6): 98.8; T(7): 1.2	151.09	42.12	2	0.00221261	988.499	-2.87642	0.937027	0.968204	1.01753	0.974252	1.0933	1.02988	0.973434	1.03221	0.943853	0.237945
nLsSEIPEPENsDGsFGGHQR	1	PLY66812.1	hypothetical protein LSAT_5X23200 [Lactuca sativa]		hypothetical protein LSAT_5X23200 [Lactuca sativa]	N-Term(iTRAQ8plex); S3(Phospho); S12(Phospho); S15(Phospho)	0	S(3): 94.4; S(4): 5.6; S(12): 100.0; S(15): 100.0	193.981	19.18	3	0.68785	2801.12	-0.168003	1.04436	0.995091	1.10491	1.04812	0.874554	0.92486	1.06927	0.956229	1.0961	0.238827
tsIGGGGGAIGGsFSR	5	XP_023736080.1	protein IWS1 homolog [Lactuca sativa]		protein IWS1 homolog [Lactuca sativa]	N-Term(iTRAQ8plex); S2(Phospho); S13(Phospho)	0	T(1): 3.6; S(2): 96.4; S(13): 100.0; S(15): 0.0	225.06	41.21	2	0.0043026	1844.82	-0.975554	0.986607	0.981329	0.973518	0.980485	1.09001	1.01137	0.978316	1.02657	0.955112	0.239125
nDTALLTLEDGGsPVRNPSSAAEDAR	4	XP_023763087.1	kinesin-like protein KIN-14B [Lactuca sativa]		kinesin-like protein KIN-14B [Lactuca sativa]	N-Term(iTRAQ8plex); S13(Phospho)	1	T(3): 0.0; T(7): 0.3; S(13): 99.0; S(19): 0.3; S(20): 0.3	117.761	6.12	3	53.2301	3040.44	-3.67046	0.904399	0.92983	1.0395	0.957911	1.06124	0.999754	1.00293	1.02131	0.937926	0.240366
eSEsGEEDsDQEELDk	2	XP_023736347.1	uncharacterized CRM domain-containing protein At3g25440, chloroplastic [Lactuca sativa]		uncharacterized CRM domain-containing protein At3g25440, chloroplastic [Lactuca sativa]	N-Term(iTRAQ8plex); S4(Phospho); S9(Phospho); K16(iTRAQ8plex)	0	S(2): 50.0; S(4): 50.0; S(9): 100.0	159.052	10.92	3	4.48239	2594.05	-1.515	1.03379	0.980592	0.864076	0.959486	0.985991	1.03777	1.10775	1.04383	0.919193	0.240755
nLsYQYsTGADGR	3	XP_023772952.1	ABC transporter B family member 19 [Lactuca sativa]		ABC transporter B family member 19 [Lactuca sativa]	N-Term(iTRAQ8plex); S3(Phospho); S7(Phospho)	0	S(3): 100.0; Y(4): 0.0; Y(6): 0.1; S(7): 97.4; T(8): 2.6	232.293	40.64	2	0.0030118	1895.79	-1.38591	1.01168	1.02474	1.03957	1.02533	0.995264	0.916117	1.02583	0.979071	1.04725	0.241417
tAEVPEGsQQsEmk	1	PLY62833.1	hypothetical protein LSAT_4X19300 [Lactuca sativa]		hypothetical protein LSAT_4X19300 [Lactuca sativa]	N-Term(iTRAQ8plex); S8(Phospho); S11(Phospho); M13(Oxidation); K14(iTRAQ8plex)	0	T(1): 0.0; S(8): 100.0; S(11): 100.0	133.362	11.57	3	6.61447	2305.03	-1.10257	1.07512	1.19679	0.905855	1.05926	0.968913	0.949041	0.904525	0.940826	1.12588	0.242718
gAFtPGsGGNER	2	XP_023736442.1	nucleolin 1-like isoform X3 [Lactuca sativa]		nucleolin 1-like isoform X3 [Lactuca sativa]	N-Term(iTRAQ8plex); T4(Phospho); S7(Phospho)	0	T(4): 100.0; S(7): 100.0	148.041	12.89	2	1.12576	1613.66	-4.2263	0.992739	0.978438	0.966169	0.979115	1.08753	1.03235	0.96563	1.02851	0.951978	0.242751
iLQSGQQLDDRPEGARsPsPDPIYDNMGTR	1	XP_023744713.1	splicing factor-like protein 1 [Lactuca sativa]		splicing factor-like protein 1 [Lactuca sativa]	N-Term(iTRAQ8plex); S17(Phospho); S19(Phospho)	1	S(4): 0.6; S(17): 92.3; S(19): 7.2; Y(24): 92.8; T(29): 7.2	89.1645	0.58	3	209.996	3777.73	0.369563	0.940848	0.931292	0.960107	0.944083	1.13551	1.18248	0.888912	1.06897	0.883172	0.243756
vssPISNSTAPPQNSSSLSTVAPk	1	PLY67039.1	hypothetical protein LSAT_5X148881 [Lactuca sativa]		hypothetical protein LSAT_5X148881 [Lactuca sativa]	N-Term(iTRAQ8plex); S2(Phospho); S3(Phospho); K24(iTRAQ8plex)	0	S(2): 90.7; S(3): 10.2; S(6): 28.6; S(8): 28.6; T(9): 28.6; S(15): 2.7; S(16): 2.7; S(17): 2.7; S(19): 2.7; T(20): 2.7	49.5259	6.11	3	56.806	3124.55	1.02933	0.915415	0.897498	1.06005	0.957655	1.13917	1.06335	0.965261	1.05593	0.906933	0.243952
tSsESFLIEEQPSWLDDLLNEPEsPVR	3	XP_023765142.1	uncharacterized protein At4g06598-like [Lactuca sativa]		uncharacterized protein At4g06598-like [Lactuca sativa]	N-Term(iTRAQ8plex); S3(Phospho); S24(Phospho)	0	T(1): 0.0; S(2): 1.3; S(3): 49.3; S(5): 49.3; S(13): 0.0; S(24): 100.0	283.261	25.13	3	0.638817	3581.62	-2.79991	0.890561	0.943516	1.01692	0.950332	1.02133	0.958035	1.17503	1.05147	0.903816	0.244125
dDGAVssEEEFsGGETENTQQVSR	3	XP_023762234.1	homeobox protein knotted-1-like 6 [Lactuca sativa]		homeobox protein knotted-1-like 6 [Lactuca sativa]	N-Term(iTRAQ8plex); S6(Phospho); S7(Phospho); S12(Phospho)	0	S(6): 100.0; S(7): 100.0; S(12): 99.8; T(16): 0.2; T(19): 0.0; S(23): 0.0	249.741	84.47	3	1.50412e-07	3102.19	2.45995	1.06544	1.05703	0.975389	1.03262	0.949953	1.04119	0.905035	0.965393	1.06964	0.244283
gAASssGsDDE	1	XP_023769455.1	dnaJ protein ERDJ2A [Lactuca sativa]		dnaJ protein ERDJ2A [Lactuca sativa]	N-Term(iTRAQ8plex); S5(Phospho); S6(Phospho); S8(Phospho)	0	S(4): 14.4; S(5): 95.2; S(6): 95.2; S(8): 95.2	90.7034	25.57	2	0.00554664	1526.46	-0.691845	1.08831	1.02967	1.14432	1.08744	1.02726	1.0507	0.694158	0.92404	1.17683	0.244316
qSIAFDLPsPGsVSSDGSITR	2	XP_023746332.1	ataxin-2 homolog [Lactuca sativa]		ataxin-2 homolog [Lactuca sativa]	N-Term(iTRAQ8plex); S9(Phospho); S12(Phospho)	0	S(2): 0.0; S(9): 100.0; S(12): 46.1; S(14): 46.1; S(15): 2.6; S(18): 2.6; T(20): 2.6	124.749	24.99	3	0.437876	2585.18	-2.87233	0.987042	1.0781	1.03721	1.03412	0.901654	0.935243	1.05124	0.962712	1.07417	0.244717
aGGITSLVsPcPVtPsVLPtPIFSPSR	2	XP_023742034.1	uncharacterized protein LOC111890116 [Lactuca sativa]		uncharacterized protein LOC111890116 [Lactuca sativa]	N-Term(iTRAQ8plex); S9(Phospho); C11(Carbamidomethyl); T14(Phospho); S16(Phospho); T20(Phospho)	0	T(5): 0.0; S(6): 0.0; S(9): 100.0; T(14): 50.0; S(16): 50.0; T(20): 100.0; S(24): 95.5; S(26): 4.5	100.894	16.13	3	4.81102	3361.54	2.03214	1.12322	0.931491	1.07885	1.04452	0.963959	0.997975	0.916845	0.959593	1.0885	0.246026
fAFDGPDQYGDGSsPPGGFR	31	XP_023769518.1	AT-hook motif nuclear-localized protein 8-like [Lactuca sativa]		AT-hook motif nuclear-localized protein 8-like [Lactuca sativa]	N-Term(iTRAQ8plex); S14(Phospho)	0	Y(9): 0.0; S(13): 2.0; S(14): 98.0	291.489	51.91	2	0.000596179	2458.08	4.06202	1.00265	0.903076	1.03483	0.980185	1.05808	0.999978	1.06423	1.04076	0.941797	0.246203
qFsGIsDSk	4	XP_023768517.1	myb-like protein X [Lactuca sativa]		myb-like protein X [Lactuca sativa]	N-Term(iTRAQ8plex); S3(Phospho); S6(Phospho); K9(iTRAQ8plex)	0	S(3): 100.0; S(6): 100.0; S(8): 0.0	188.325	24.77	3	0.242901	1736.81	-2.1273	1.02686	0.980318	0.964579	0.990587	1.06678	1.09817	0.975065	1.04667	0.946416	0.246941
aGsAsPVR	1	XP_023760259.1	RNA-binding protein EWS [Lactuca sativa]		RNA-binding protein EWS [Lactuca sativa]	N-Term(iTRAQ8plex); S3(Phospho); S5(Phospho)	0	S(3): 100.0; S(5): 100.0	152.62	13.71	2	0.732029	1208.54	-1.35769	1.1155	0.984558	1.14345	1.08117	1.1299	0.85051	0.806759	0.929057	1.16373	0.247518
vVYIPANPPsPVPEEsEEGSSPRGEDGSQNSSWPDVTTR	4	XP_023733538.1	vesicle-associated protein 1-3 [Lactuca sativa]		vesicle-associated protein 1-3 [Lactuca sativa]	N-Term(iTRAQ8plex); S10(Phospho); S16(Phospho)	1	Y(3): 0.0; S(10): 99.7; S(16): 82.6; S(20): 8.8; S(21): 8.8; S(28): 0.0; S(31): 0.0; S(32): 0.0; T(37): 0.0; T(38): 0.0	142.965	16.73	4	5.26458	4618.06	-1.08373	1.06048	0.811673	0.89051	0.920888	1.028	0.952561	1.23932	1.07329	0.858001	0.248503
vVVVtP	4	XP_023753882.1	40S ribosomal protein S19-3 [Lactuca sativa]		40S ribosomal protein S19-3 [Lactuca sativa]	N-Term(iTRAQ8plex); T5(Phospho)	0	T(5): 100.0	147.09	51.16	2	0.000184509	997.561	-2.76941	0.976795	0.996476	0.960614	0.977961	0.977524	1.01148	1.10879	1.0326	0.94709	0.2504
lADIsDGESDEGGR	1	XP_023738759.1	protein EMSY-LIKE 3-like [Lactuca sativa]		protein EMSY-LIKE 3-like [Lactuca sativa]	N-Term(iTRAQ8plex); S5(Phospho)	0	S(5): 97.7; S(9): 2.3	148.915	12.11	2	3.28197	1804.79	-1.95007	1.05759	1.01433	1.00644	1.02612	0.964955	0.929197	1.03927	0.977807	1.04941	0.251901
vEESEEAGETSEsAPEsESESTETEVVEPSEVR	15	XP_023748274.1	heat shock protein 90-5, chloroplastic [Lactuca sativa]		heat shock protein 90-5, chloroplastic [Lactuca sativa]	N-Term(iTRAQ8plex); S13(Phospho); S17(Phospho)	0	S(4): 4.4; T(10): 27.3; S(11): 27.3; S(13): 27.3; S(17): 27.3; S(19): 27.3; S(21): 27.3; T(22): 27.3; T(24): 4.4; S(30): 0.0	50.2536	17.81	3	2.06392	4018.66	1.11493	1.20858	0.878287	1.10333	1.0634	0.902853	0.973314	0.914328	0.930165	1.14324	0.25291
mEIEtDcsTPALYSNEk	2	PLY74519.1	hypothetical protein LSAT_7X31640 [Lactuca sativa]		hypothetical protein LSAT_7X31640 [Lactuca sativa]	N-Term(iTRAQ8plex); T5(Phospho); C7(Carbamidomethyl); S8(Phospho); K17(iTRAQ8plex)	0	T(5): 100.0; S(8): 50.0; T(9): 50.0; Y(13): 0.0; S(14): 0.0	159.948	31.69	3	0.0813847	2756.21	0.947271	1.00357	0.946851	0.973331	0.974585	0.952509	1.07103	1.07181	1.03178	0.944564	0.253221
ySSGsVDsDGGR	3	XP_023733417.1	CLIP-associated protein-like isoform X2 [Lactuca sativa]		CLIP-associated protein-like isoform X2 [Lactuca sativa]	N-Term(iTRAQ8plex); S5(Phospho); S8(Phospho)	0	Y(1): 0.0; S(2): 0.0; S(3): 0.1; S(5): 99.9; S(8): 100.0	137.503	17.74	2	0.267545	1650.63	-0.427888	1.18598	0.963186	1.00089	1.05002	1.01087	0.918796	0.919197	0.949621	1.10572	0.25357
sYDPYDAVGtssEEGYVQVTSTk	25	XP_023759265.1	CLIP-associated protein-like [Lactuca sativa]		CLIP-associated protein-like [Lactuca sativa]	N-Term(iTRAQ8plex); T10(Phospho); S11(Phospho); S12(Phospho); K23(iTRAQ8plex)	0	S(1): 0.0; Y(2): 0.0; Y(5): 0.0; T(10): 74.9; S(11): 74.9; S(12): 74.9; Y(16): 74.9; T(20): 0.2; S(21): 0.1; T(22): 0.0	157.549	32.06	3	0.0710045	3331.4	-5.16885	0.985179	1.03568	1.01039	1.01042	0.998693	0.978179	0.991466	0.989446	1.02119	0.254316
tEsNTPILNMDDIDEGVEGYDEDR	6	XP_023763427.1	cellulose synthase A catalytic subunit 1 [UDP-forming]-like [Lactuca sativa]		cellulose synthase A catalytic subunit 1 [UDP-forming]-like [Lactuca sativa]	N-Term(iTRAQ8plex); S3(Phospho)	0	T(1): 3.3; S(3): 93.4; T(5): 3.3; Y(20): 0.0	180.959	31.1	3	0.0848826	3111.32	-2.00594	0.945121	0.882291	1.05478	0.96073	0.997009	1.0165	1.12422	1.04591	0.918559	0.254453
nYsDYEDsDEEVANGVAGNDDVEEk	4	PLY66043.1	hypothetical protein LSAT_6X37120 [Lactuca sativa]		hypothetical protein LSAT_6X37120 [Lactuca sativa]	N-Term(iTRAQ8plex); S3(Phospho); S8(Phospho); K25(iTRAQ8plex)	0	Y(2): 2.8; S(3): 97.2; Y(5): 0.0; S(8): 100.0	438.367	66.66	3	1.89018e-05	3531.44	-2.86262	0.929075	1.01388	0.969862	0.970939	1.06787	0.977118	1.01155	1.01885	0.95298	0.254563
tGsFTGVASHsGPIMSNAAR	18	XP_023758967.1	uncharacterized membrane protein At1g16860-like [Lactuca sativa]		uncharacterized membrane protein At1g16860-like [Lactuca sativa]	N-Term(iTRAQ8plex); S3(Phospho); S11(Phospho)	0	T(1): 3.7; S(3): 92.7; T(5): 3.7; S(9): 0.0; S(11): 100.0; S(16): 0.0	294.072	48.09	3	0.00156791	2412.07	0.247005	0.956393	0.997564	0.9893	0.981086	1.00309	1.0291	0.983591	1.00526	0.975951	0.255177
vAtVPGVLSELDDEGFSsDAPssVsQDR	3	XP_023736195.1	alpha,alpha-trehalose-phosphate synthase [UDP-forming] 5 [Lactuca sativa]		alpha,alpha-trehalose-phosphate synthase [UDP-forming] 5 [Lactuca sativa]	N-Term(iTRAQ8plex); T3(Phospho); S18(Phospho); S22(Phospho); S23(Phospho); S25(Phospho)	0	T(3): 100.0; S(9): 0.0; S(17): 100.0; S(18): 100.0; S(22): 100.0; S(23): 99.5; S(25): 0.5	139.402	35.34	3	0.0177788	3568.39	2.52246	0.865878	0.996597	1.01772	0.960066	1.0305	1.01724	1.02192	1.02322	0.938279	0.255645
aAstSTASPQQSPPPPPPPVPESTDESAAk	10	XP_023755238.1	uncharacterized protein LOC111903716 [Lactuca sativa]		uncharacterized protein LOC111903716 [Lactuca sativa]	N-Term(Acetyl); S3(Phospho); T4(Phospho); K30(iTRAQ8plex)	0	S(3): 97.3; T(4): 50.0; S(5): 49.9; T(6): 2.7; S(8): 0.1; S(12): 0.0; S(23): 0.0; T(24): 0.0; S(27): 0.0	204.789	21.28	3	1.4567	3435.58	6.04801	1.00566	0.9398	0.90567	0.950377	1.09991	1.15702	0.910953	1.05596	0.900012	0.257047
kYTFTASTANAAIEDDsGSEk	2	XP_023762435.1	BAG family molecular chaperone regulator 7 [Lactuca sativa]		BAG family molecular chaperone regulator 7 [Lactuca sativa]	N-Term(iTRAQ8plex); K1(iTRAQ8plex); S17(Phospho); K21(iTRAQ8plex)	1	Y(2): 0.0; T(3): 0.0; T(5): 0.0; S(7): 0.0; T(8): 0.0; S(17): 3.3; S(19): 96.7	117.497	4.71	4	84.4993	3198.59	-1.46451	0.882877	1.00757	1.0185	0.969651	1.06473	1.0775	0.97854	1.04026	0.932126	0.257102
gQGVsStNDDDEVLNTENENR	13	XP_023741679.1	uncharacterized protein LOC111889758 [Lactuca sativa]		uncharacterized protein LOC111889758 [Lactuca sativa]	N-Term(iTRAQ8plex); S5(Phospho); T7(Phospho)	0	S(5): 66.7; S(6): 66.7; T(7): 66.7; T(16): 0.0	163.555	32.81	3	0.0335366	2757.12	1.58354	0.995461	0.948521	0.946863	0.963615	1.17432	1.05466	0.938507	1.05583	0.912663	0.257625
iESVPELPLVVsDSAEGVEk	2	XP_023728932.1	60S ribosomal protein L4 [Lactuca sativa]		60S ribosomal protein L4 [Lactuca sativa]	N-Term(iTRAQ8plex); S12(Phospho); K20(iTRAQ8plex)	0	S(3): 0.0; S(12): 50.0; S(14): 50.0	136.013	28.59	3	0.268965	2785.46	-4.03955	1.03379	0.854355	0.990506	0.95955	0.996987	1.02056	1.127	1.04818	0.915442	0.257896
tSNADtDMEsDssDsDEDELDNEGPk	1	XP_023763789.1	glutamate-rich WD repeat-containing protein 1-like [Lactuca sativa]		glutamate-rich WD repeat-containing protein 1-like [Lactuca sativa]	N-Term(iTRAQ8plex); T6(Phospho); S10(Phospho); S12(Phospho); S13(Phospho); S15(Phospho); K26(iTRAQ8plex)	0	T(1): 0.0; S(2): 0.1; T(6): 99.9; S(10): 100.0; S(12): 100.0; S(13): 100.0; S(15): 100.0	99.9806	37.17	3	0.00486383	3811.29	-1.13655	0.962044	0.901892	0.864184	0.909373	1.29151	0.825374	1.1766	1.09783	0.828338	0.258164
vNsEDDIGsPQQDDTQPEDk	1	PLY90936.1	hypothetical protein LSAT_9X106140 [Lactuca sativa]		hypothetical protein LSAT_9X106140 [Lactuca sativa]	N-Term(iTRAQ8plex); S3(Phospho); S9(Phospho); K20(iTRAQ8plex)	0	S(3): 100.0; S(9): 99.8; T(15): 0.2	169.376	29.09	3	0.147171	2985.29	2.24617	1.10726	0.885035	0.773589	0.92196	1.12706	1.19671	0.936386	1.08672	0.84839	0.258512
tSNADtDMDsDssDsDEDEIENEGPk	2	XP_023746526.1	glutamate-rich WD repeat-containing protein 1-like [Lactuca sativa]		glutamate-rich WD repeat-containing protein 1-like [Lactuca sativa]	N-Term(iTRAQ8plex); T6(Phospho); S10(Phospho); S12(Phospho); S13(Phospho); S15(Phospho); K26(iTRAQ8plex)	0	T(1): 0.0; S(2): 0.0; T(6): 100.0; S(10): 100.0; S(12): 100.0; S(13): 100.0; S(15): 100.0	119.986	38.62	3	0.00349007	3811.29	-0.560039	1.00398	0.931663	0.965685	0.967108	0.991197	0.984846	1.13186	1.03597	0.933533	0.258567
cDtPVstPGRNEELVSFEDALk	1	PLY99881.1	hypothetical protein LSAT_4X32040 [Lactuca sativa]		hypothetical protein LSAT_4X32040 [Lactuca sativa]	N-Term(iTRAQ8plex); C1(Carbamidomethyl); T3(Phospho); S6(Phospho); T7(Phospho); K22(iTRAQ8plex)	1	T(3): 100.0; S(6): 100.0; T(7): 100.0; S(16): 0.0	150.155	10.82	3	14.8284	3312.48	-0.059525	1.05753	0.958567	1.08277	1.03296	0.966023	1.01708	0.942979	0.975362	1.05905	0.25859
vSGTEPAPTtP	3	XP_023745760.1	65-kDa microtubule-associated protein 1-like [Lactuca sativa]		65-kDa microtubule-associated protein 1-like [Lactuca sativa]	N-Term(iTRAQ8plex); T10(Phospho)	0	S(2): 0.0; T(4): 0.0; T(9): 0.0; T(10): 100.0	229.642	54.62	2	0.000167395	1440.69	-1.67366	1.03518	0.967165	1.07817	1.02684	0.99922	0.990946	0.948939	0.979702	1.04811	0.259082
nGNAsPGsPDNDk	1	XP_023759370.1	protein argonaute 4-like isoform X2 [Lactuca sativa]		protein argonaute 4-like isoform X2 [Lactuca sativa]	N-Term(iTRAQ8plex); S5(Phospho); S8(Phospho); K13(iTRAQ8plex)	0	S(5): 100.0; S(8): 100.0	92.3445	5.04	3	20.6797	2040.89	-1.59501	1.0849	0.851296	0.942343	0.959514	1.04269	1.0562	1.0477	1.04886	0.914814	0.259712
cVGGGAPtENADsDSDLEVVSDSIPVNLR	3	XP_023733270.1	E3 SUMO-protein ligase SIZ1-like [Lactuca sativa]		E3 SUMO-protein ligase SIZ1-like [Lactuca sativa]	N-Term(iTRAQ8plex); C1(Carbamidomethyl); T8(Phospho); S13(Phospho)	0	T(8): 66.6; S(13): 66.6; S(15): 66.6; S(21): 0.0; S(23): 0.0	63.6999	4.05	3	70.7013	3437.52	2.81905	1.01566	0.931167	0.942156	0.962994	1.12388	0.936151	1.07236	1.04413	0.922294	0.260543
lDGPISEFEPmDsGsELEEDDVk	3	XP_023747914.1	uncharacterized protein LOC111896128 [Lactuca sativa]		uncharacterized protein LOC111896128 [Lactuca sativa]	N-Term(iTRAQ8plex); M11(Oxidation); S13(Phospho); S15(Phospho); K23(iTRAQ8plex)	0	S(6): 0.0; S(13): 100.0; S(15): 100.0	195.373	55.51	3	0.000401821	3322.45	1.57678	1.0814	1.00749	1.02162	1.03684	1.04288	0.98114	0.940006	0.988009	1.04942	0.262899
sTFTFDSVPGTPAYsYAGsPPADNLFQNR	11	XP_023770376.1	epidermal growth factor receptor substrate 15-like 1 isoform X2 [Lactuca sativa]		epidermal growth factor receptor substrate 15-like 1 isoform X2 [Lactuca sativa]	N-Term(iTRAQ8plex); S15(Phospho); S19(Phospho)	0	S(1): 0.0; T(2): 0.0; T(4): 0.0; S(7): 0.1; T(11): 25.1; Y(14): 25.1; S(15): 25.1; Y(16): 25.1; S(19): 99.4	192.082	29.55	3	0.218507	3571.6	5.30146	0.989853	1.02197	0.951054	0.987627	1.07361	1.00279	1.00661	1.02767	0.961036	0.263558
kEEEAEAsDDDMGFGLFD	100	XP_023734135.1	60S acidic ribosomal protein P0-like [Lactuca sativa]		60S acidic ribosomal protein P0-like [Lactuca sativa]	N-Term(iTRAQ8plex); K1(iTRAQ8plex); S8(Phospho)	1	S(8): 100.0	473.145	42.17	2	0.00630399	2693.18	-0.243647	0.973243	1.00649	0.928005	0.969245	1.01693	0.966258	1.1181	1.03376	0.93759	0.267224
tySsEsEDENDDDEVSEDDVTIPLSk	20	XP_023753888.1	histone deacetylase 5 [Lactuca sativa]		histone deacetylase 5 [Lactuca sativa]	N-Term(iTRAQ8plex); Y2(Phospho); S4(Phospho); S6(Phospho); K26(iTRAQ8plex)	0	T(1): 3.3; Y(2): 49.9; S(3): 50.1; S(4): 96.7; S(6): 100.0; S(16): 0.0; T(21): 0.0; S(25): 0.0	193.174	35.31	3	0.0316967	3766.54	6.92558	1.03124	0.93867	0.970543	0.98015	1.00256	1.00545	1.0592	1.0224	0.958673	0.267232
eVGEATPNsLEsEENISSSEVDSSVSSk	2	XP_023763264.1	calmodulin-binding transcription activator 3 [Lactuca sativa]		calmodulin-binding transcription activator 3 [Lactuca sativa]	N-Term(iTRAQ8plex); S9(Phospho); S12(Phospho); K28(iTRAQ8plex)	0	T(6): 0.5; S(9): 6.0; S(12): 1.9; S(17): 46.6; S(18): 46.6; S(19): 46.6; S(23): 23.5; S(24): 26.3; S(26): 1.9; S(27): 0.2	87.3808	19.71	3	2.24929	3665.65	0.844958	1.23769	1.14026	0.90157	1.09318	1.08117	0.712184	0.92204	0.90513	1.20776	0.26788
aSGSAPITGLLEtssEsEDSEIEEVQk	4	XP_023758909.1	uncharacterized protein LOC111907368 [Lactuca sativa]		uncharacterized protein LOC111907368 [Lactuca sativa]	N-Term(iTRAQ8plex); T13(Phospho); S14(Phospho); S15(Phospho); S17(Phospho); K27(iTRAQ8plex)	0	S(2): 0.0; S(4): 0.0; T(8): 0.0; T(13): 80.0; S(14): 80.0; S(15): 80.0; S(17): 80.0; S(20): 80.0	130.585	27.06	3	0.306105	3721.6	1.20311	0.871841	0.990657	0.959436	0.940645	0.966287	1.24021	0.983566	1.06336	0.884601	0.267932
nsFGsQsSEIDNQEAR	4	XP_023768814.1	protein IQ-DOMAIN 32-like [Lactuca sativa]		protein IQ-DOMAIN 32-like [Lactuca sativa]	N-Term(iTRAQ8plex); S2(Phospho); S5(Phospho); S7(Phospho)	0	S(2): 100.0; S(5): 97.1; S(7): 51.4; S(8): 51.4	89.4939	16.2	2	0.593711	2312.88	0.232233	1.07228	0.909804	0.866225	0.949438	0.961982	1.13767	1.05986	1.05317	0.901505	0.268086
vIPLSSsPSNNE	2	XP_023758784.1	uncharacterized protein LOC111907235 [Lactuca sativa]		uncharacterized protein LOC111907235 [Lactuca sativa]	N-Term(iTRAQ8plex); S7(Phospho)	0	S(5): 48.2; S(6): 1.8; S(7): 48.2; S(9): 1.8	106.613	22.76	2	0.400161	1627.79	1.52643	1.00261	1.02795	1.10183	1.04413	0.899832	1.07355	0.917347	0.963577	1.0836	0.268428
eVDFGssDNsGDEMk	3	XP_023758019.1	uncharacterized protein LOC111906495 isoform X5 [Lactuca sativa]		uncharacterized protein LOC111906495 isoform X5 [Lactuca sativa]	N-Term(iTRAQ8plex); S6(Phospho); S7(Phospho); S10(Phospho); K15(iTRAQ8plex)	0	S(6): 100.0; S(7): 100.0; S(10): 100.0	160.412	31.48	2	0.0216565	2464.95	-0.0295321	0.98415	0.985472	1.04268	1.0041	0.996575	0.932498	0.978908	0.969327	1.03587	0.269551
mVDAsDsEDsGSESGSAP	19	XP_023736464.1	uncharacterized protein LOC111884381 [Lactuca sativa]		uncharacterized protein LOC111884381 [Lactuca sativa]	N-Term(iTRAQ8plex); S5(Phospho); S7(Phospho); S10(Phospho)	0	S(5): 100.0; S(7): 100.0; S(10): 100.0; S(12): 0.0; S(14): 0.0; S(16): 0.0	266.674	47.3	2	0.000133139	2271.76	-0.631318	1.06679	1.00482	1.01823	1.02995	0.975658	1.04068	0.935174	0.983836	1.04687	0.269863
vAtVPGVLsELDDEGFSSDAPSsVsQDR	6	XP_023736195.1	alpha,alpha-trehalose-phosphate synthase [UDP-forming] 5 [Lactuca sativa]		alpha,alpha-trehalose-phosphate synthase [UDP-forming] 5 [Lactuca sativa]	N-Term(iTRAQ8plex); T3(Phospho); S9(Phospho); S23(Phospho); S25(Phospho)	0	T(3): 100.0; S(9): 5.3; S(17): 89.5; S(18): 5.3; S(22): 100.0; S(23): 99.6; S(25): 0.4	219.334	34.49	3	0.0304598	3488.41	0.207183	1.01258	0.938347	0.940776	0.963901	1.03049	1.13716	0.951051	1.03957	0.927212	0.270046
sFLGAAAItDDsEEEEGYYPEGLDVAVGNR	47	XP_023750179.1	UDP-glucosyl transferase 73B2-like [Lactuca sativa]		UDP-glucosyl transferase 73B2-like [Lactuca sativa]	N-Term(iTRAQ8plex); T9(Phospho); S12(Phospho)	0	S(1): 0.0; T(9): 100.0; S(12): 100.0; Y(18): 0.0; Y(19): 0.0	351.149	98.74	3	2.31031e-08	3638.58	1.07687	1.02871	1.00173	1.03927	1.02324	1.02226	1.00357	0.982129	1.00265	1.02053	0.270332
ssGPQsGGVTPVNR	6	XP_023758967.1	uncharacterized membrane protein At1g16860-like [Lactuca sativa]		uncharacterized membrane protein At1g16860-like [Lactuca sativa]	N-Term(iTRAQ8plex); S2(Phospho); S6(Phospho)	0	S(1): 66.7; S(2): 66.7; S(6): 66.7; T(10): 0.0	156.606	36.12	3	0.01339	1806.81	-0.573248	0.964498	0.963935	1.00387	0.977434	1.06973	0.967529	1.01864	1.01863	0.959555	0.271543
wLPNVQDcEEHsAQsAk	1	XP_023766005.1	uncharacterized protein LOC111914498 [Lactuca sativa]		uncharacterized protein LOC111914498 [Lactuca sativa]	N-Term(iTRAQ8plex); C8(Carbamidomethyl); S12(Phospho); S15(Phospho); K17(iTRAQ8plex)	0	S(12): 100.0; S(15): 100.0	218.065	21.27	3	0.980834	2767.24	0.000570571	1.06136	1.06571	0.975012	1.03403	1.01228	1.00925	0.892803	0.971443	1.06442	0.272157
tItGTSSSk	6	XP_023730759.1	synaptotagmin-5 [Lactuca sativa]		synaptotagmin-5 [Lactuca sativa]	N-Term(iTRAQ8plex); T3(Phospho); K9(iTRAQ8plex)	0	T(1): 2.7; T(3): 97.3; T(5): 0.0; S(6): 0.0; S(7): 0.0; S(8): 0.0	106.862	21.68	3	0.679204	1569.83	-0.910479	0.924851	1.0187	0.931021	0.958189	1.17372	0.979639	0.987877	1.04708	0.915108	0.274379
mLIysSSEAEDsNDHNAPTTk	3	XP_023746272.1	reticulon-like protein B9 [Lactuca sativa]		reticulon-like protein B9 [Lactuca sativa]	M1(Oxidation); N-Term(Acetyl); Y4(Phospho); S5(Phospho); S12(Phospho); K21(iTRAQ8plex)	0	Y(4): 16.2; S(5): 78.7; S(6): 78.7; S(7): 21.8; S(12): 76.2; T(19): 14.2; T(20): 14.2	58.7397	13.77	3	1.59089	2912.12	-2.33465	1.06412	0.875795	0.957964	0.965959	0.995703	1.08309	1.04719	1.04199	0.927029	0.274643
mNAVDDtsDDDDDDDDDDDDGk	2	XP_023755908.1	nucleolar protein 14 [Lactuca sativa]		nucleolar protein 14 [Lactuca sativa]	N-Term(iTRAQ8plex); T7(Phospho); S8(Phospho); K22(iTRAQ8plex)	0	T(7): 100.0; S(8): 100.0	153.152	31.95	3	0.0110739	3186.12	0.0342466	1.04016	0.964198	0.886371	0.963575	1.0943	1.06007	0.962089	1.03882	0.927568	0.274689
sLsGDDEMEEsSPk	8	XP_023745783.1	E3 ubiquitin-protein ligase RBBP6-like [Lactuca sativa]		E3 ubiquitin-protein ligase RBBP6-like [Lactuca sativa]	N-Term(iTRAQ8plex); S3(Phospho); S11(Phospho); K14(iTRAQ8plex)	0	S(1): 3.0; S(3): 95.5; S(11): 50.8; S(12): 50.8	114.783	34.97	2	0.0190256	2278.96	-0.50578	1.00255	1.00397	1.06753	1.02469	0.959772	1.02496	0.98012	0.988284	1.03683	0.27501
sDGDQLPGNEDSWIcPsD	1	PLY95189.1	hypothetical protein LSAT_6X103400 [Lactuca sativa]		hypothetical protein LSAT_6X103400 [Lactuca sativa]	N-Term(iTRAQ8plex); C15(Carbamidomethyl); S17(Phospho)	0	S(1): 0.0; S(12): 0.0; S(17): 100.0	121.908	11.31	2	3.46135	2375.97	0.835766	0.911988	0.926294	1.02924	0.95584	0.935596	1.1721	1.05399	1.05389	0.906962	0.275119
sVEVEPTIDPPsPk	4	XP_023739333.1	uncharacterized protein At1g15400-like [Lactuca sativa]		uncharacterized protein At1g15400-like [Lactuca sativa]	N-Term(iTRAQ8plex); S12(Phospho); K14(iTRAQ8plex)	0	S(1): 0.0; T(7): 0.0; S(12): 100.0	238.677	27.84	3	0.243038	2183.14	-1.48964	1.04806	0.991599	1.04533	1.02833	1.04587	0.927687	0.96119	0.978249	1.05119	0.275494
aSFDEDDssPDDDLDDDLEEDFk	5	PLY74894.1	hypothetical protein LSAT_2X38240 [Lactuca sativa]		hypothetical protein LSAT_2X38240 [Lactuca sativa]	N-Term(iTRAQ8plex); S8(Phospho); S9(Phospho); K23(iTRAQ8plex)	0	S(2): 0.0; S(8): 100.0; S(9): 100.0	146.55	52.83	3	0.000336692	3402.36	3.15794	0.937998	0.899706	1.07919	0.972299	1.00762	1.1345	1.02896	1.05703	0.919844	0.275967
sNDGTQSIsAPVsPVsSPPESR	1	XP_023761935.1	magnesium transporter MRS2-1-like [Lactuca sativa]		magnesium transporter MRS2-1-like [Lactuca sativa]	N-Term(iTRAQ8plex); S9(Phospho); S13(Phospho); S16(Phospho)	0	S(1): 0.2; T(5): 3.3; S(7): 48.2; S(9): 48.2; S(13): 100.0; S(16): 49.9; S(17): 49.9; S(21): 0.2	166.035	22.85	3	0.472627	2743.16	1.59805	0.934465	0.997895	0.976646	0.969669	0.946574	1.12023	1.04477	1.03719	0.934896	0.276377
sNEAEAPEEDEEDEGGssEsDVEEHVEVER	4	XP_023739756.1	metabotropic glutamate receptor-like protein P [Lactuca sativa]		metabotropic glutamate receptor-like protein P [Lactuca sativa]	N-Term(iTRAQ8plex); S17(Phospho); S18(Phospho); S20(Phospho)	0	S(1): 0.0; S(17): 100.0; S(18): 100.0; S(20): 100.0	299.249	87.25	3	7.25205e-08	3862.43	2.0784	1.02294	0.972129	0.904608	0.966559	1.15165	0.931567	1.09734	1.06019	0.911687	0.277444
aVLLEGGGLQLAsPR	2	PLY87770.1	hypothetical protein LSAT_1X40720 [Lactuca sativa]		hypothetical protein LSAT_1X40720 [Lactuca sativa]	N-Term(iTRAQ8plex); S13(Phospho)	0	S(13): 100.0	221.055	26.56	3	0.249946	1865.03	3.34362	0.959934	1.03975	0.84936	0.949682	1.08351	0.936177	1.13565	1.05178	0.902928	0.277686
lPSPSISPsPsLPPsPSLPIVAAEk	31	XP_023744762.1	myosin-9 [Lactuca sativa]		myosin-9 [Lactuca sativa]	N-Term(iTRAQ8plex); S9(Phospho); S11(Phospho); S15(Phospho); K25(iTRAQ8plex)	0	S(3): 99.7; S(5): 94.6; S(7): 5.1; S(9): 0.3; S(11): 0.3; S(15): 95.1; S(17): 4.9	135.954	18.31	3	3.75862	3316.67	-1.50016	1.01331	1.01213	0.963053	0.996165	0.998509	0.956504	0.948299	0.967771	1.02934	0.279463
sYsTNLAFTPPEYLR	2	PLY79011.1	hypothetical protein LSAT_3X7321 [Lactuca sativa]		hypothetical protein LSAT_3X7321 [Lactuca sativa]	N-Term(iTRAQ8plex); S3(Phospho)	0	S(1): 1.8; Y(2): 1.8; S(3): 94.5; T(4): 1.8; T(9): 0.0; Y(13): 0.0	171.846	21.05	2	1.01413	2143.04	0.155548	1.04456	1.11111	0.939132	1.0316	0.963526	0.960246	0.981679	0.968484	1.06517	0.27957
ekDEEsEDEEAkDEEsEDDEEEDSAk	4	XP_023747195.1	protein DEK-like isoform X2 [Lactuca sativa]		protein DEK-like isoform X2 [Lactuca sativa]	N-Term(iTRAQ8plex); K2(iTRAQ8plex); S6(Phospho); K12(iTRAQ8plex); S16(Phospho); K26(iTRAQ8plex)	2	S(6): 100.0; S(16): 100.0; S(24): 0.0	183.935	19.4	4	2.13212	4421.89	-2.32753	0.928952	1.06288	0.886023	0.959284	1.11469	0.955871	1.07523	1.0486	0.914826	0.27986
tAPEEVEsPSsVNk	5	XP_023760843.1	nuclear pore complex protein NUP50A-like [Lactuca sativa]		nuclear pore complex protein NUP50A-like [Lactuca sativa]	N-Term(iTRAQ8plex); S8(Phospho); S11(Phospho); K14(iTRAQ8plex)	0	T(1): 0.0; S(8): 95.5; S(10): 9.0; S(11): 95.5	113.528	17.79	3	1.89047	2242.05	0.93082	1.094	1.0217	0.965047	1.02692	0.958279	0.988213	0.989429	0.97864	1.04933	0.280102
aDDsPttASPPPEMASEQPILSHPPPSPPPPGSVTEk	6	XP_023738043.1	patellin-3-like [Lactuca sativa]		patellin-3-like [Lactuca sativa]	N-Term(Acetyl); S4(Phospho); T6(Phospho); T7(Phospho); K37(iTRAQ8plex)	0	S(4): 99.4; T(6): 7.5; T(7): 92.5; S(9): 0.6; S(16): 0.0; S(22): 0.0; S(27): 100.0; S(33): 0.0; T(35): 0.0	123.279	17.79	4	3.86494	4331.91	0.597501	0.976669	0.964868	0.978449	0.973329	1.03975	1.06565	0.948359	1.01792	0.956195	0.281247
dGFMGENQALNTPTDYGEDFFNNLPsPk	9	PLY99881.1	hypothetical protein LSAT_4X32040 [Lactuca sativa]		hypothetical protein LSAT_4X32040 [Lactuca sativa]	N-Term(iTRAQ8plex); S26(Phospho); K28(iTRAQ8plex)	0	T(12): 0.0; T(14): 0.0; Y(16): 0.0; S(26): 100.0	293.864	13.78	4	10.1725	3806.76	1.7234	1.01814	0.99745	0.890197	0.968596	0.984713	1.03514	1.05204	1.02397	0.945926	0.281435
iIVGADSEmsVtNtRIVtsTALGILASk	3	XP_023755008.1	TATA-binding protein-associated factor BTAF1 [Lactuca sativa]		TATA-binding protein-associated factor BTAF1 [Lactuca sativa]	N-Term(iTRAQ8plex); M9(Oxidation); S10(Phospho); T12(Phospho); T14(Phospho); T18(Phospho); S19(Phospho); K28(iTRAQ8plex)	1	S(7): 71.4; S(10): 71.4; T(12): 71.4; T(14): 71.4; T(18): 71.4; S(19): 71.4; T(20): 71.4; S(27): 0.2	35.8909	6.75	3	54.1265	3871.79	-0.362533	0.922327	0.985893	0.966188	0.958136	0.916696	1.07314	1.15069	1.04684	0.915265	0.281583
tSSLNASsDDENEGFAsGEEEAFETNLDENSk	2	XP_023771882.1	translocase of chloroplast 159, chloroplastic [Lactuca sativa]		translocase of chloroplast 159, chloroplastic [Lactuca sativa]	N-Term(iTRAQ8plex); S8(Phospho); S17(Phospho); K32(iTRAQ8plex)	0	T(1): 0.0; S(2): 0.0; S(3): 0.0; S(7): 50.6; S(8): 50.6; S(17): 96.1; T(25): 2.6; S(31): 0.0	157.11	28.72	3	0.187517	4191.73	-4.8404	1.02391	0.919781	0.971697	0.971797	1.12438	0.999405	0.988839	1.03754	0.936633	0.281803
dLAIGQPsGSEVGDR	3	XP_023741679.1	uncharacterized protein LOC111889758 [Lactuca sativa]		uncharacterized protein LOC111889758 [Lactuca sativa]	N-Term(iTRAQ8plex); S8(Phospho)	0	S(8): 50.0; S(10): 50.0	192.002	16.75	2	1.77322	1884.89	-3.15741	1.00839	0.906188	0.998558	0.971046	0.976436	1.12084	1.01612	1.0378	0.93568	0.283959
sGLGYGNQEAMtTSASTPQQVGGPSR	13	XP_023763874.1	uncharacterized protein LOC111912373 [Lactuca sativa]		uncharacterized protein LOC111912373 [Lactuca sativa]	N-Term(iTRAQ8plex); S1(Phospho); T12(Phospho)	0	S(1): 100.0; Y(5): 0.0; T(12): 0.0; T(13): 0.0; S(14): 0.2; S(16): 96.0; T(17): 3.9; S(25): 0.0	294.028	73.4	3	5.92386e-06	3045.34	1.20436	0.960777	0.983698	0.993775	0.979416	1.03672	1.03541	0.963204	1.01178	0.968014	0.284015
sAPTtPLDGVQGAFANLTEEER	6	XP_023751879.1	phosphoenolpyruvate carboxykinase (ATP) [Lactuca sativa]		phosphoenolpyruvate carboxykinase (ATP) [Lactuca sativa]	N-Term(iTRAQ8plex); S1(Phospho); T5(Phospho)	0	S(1): 100.0; T(4): 3.9; T(5): 96.1; T(18): 0.0	236.907	30.41	3	0.121519	2767.25	-2.77416	0.941784	0.905815	1.05508	0.96756	1.00924	1.0588	1.01172	1.02659	0.9425	0.284253
gQGVSStNDDDEVLNTENENR	1	XP_023741679.1	uncharacterized protein LOC111889758 [Lactuca sativa]		uncharacterized protein LOC111889758 [Lactuca sativa]	N-Term(iTRAQ8plex); T7(Phospho)	0	S(5): 3.1; S(6): 48.4; T(7): 48.4; T(16): 0.0	100.76	5.08	3	27.2425	2677.15	-1.59818	1.19535	1.25796	0.802488	1.08527	0.907295	0.892904	0.926246	0.908815	1.19416	0.284388
ePEIEEEDssEMsENEMDPR	7	PLY74960.1	hypothetical protein LSAT_3X98801 [Lactuca sativa]		hypothetical protein LSAT_3X98801 [Lactuca sativa]	N-Term(iTRAQ8plex); S9(Phospho); S10(Phospho); S13(Phospho)	0	S(9): 100.0; S(10): 100.0; S(13): 100.0	253.922	66.91	3	3.56482e-06	2926.03	-0.153622	1.00061	0.983663	0.964766	0.983013	1.03185	0.982122	1.00103	1.005	0.978121	0.284562
dVSALDtsEVsDDEEDDIVGEk	1	XP_023732365.1	alpha-1,4 glucan phosphorylase L-1 isozyme, chloroplastic/amyloplastic [Lactuca sativa]		alpha-1,4 glucan phosphorylase L-1 isozyme, chloroplastic/amyloplastic [Lactuca sativa]	N-Term(iTRAQ8plex); T7(Phospho); S8(Phospho); S11(Phospho); K22(iTRAQ8plex)	0	S(3): 0.2; T(7): 99.9; S(8): 99.9; S(11): 100.0	61.6266	15.38	3	2.90024	3215.33	-0.635096	1.01003	1.02682	1.1575	1.06478	0.931688	1.09869	0.806749	0.94571	1.12591	0.285053
fAVTPtTPNNsSR	2	XP_023762293.1	protein CROWDED NUCLEI 4 [Lactuca sativa]		protein CROWDED NUCLEI 4 [Lactuca sativa]	N-Term(iTRAQ8plex); T6(Phospho); S11(Phospho)	0	T(4): 0.0; T(6): 96.3; T(7): 3.7; S(11): 96.3; S(12): 3.7	154.382	13.92	2	2.78179	1855.83	-1.67136	0.875912	0.966478	1.04284	0.961743	0.961999	1.04598	1.12996	1.04598	0.919464	0.285567
tTSETDFmtEyVVTR	1	XP_023734732.1	mitogen-activated protein kinase homolog NTF6-like isoform X2 [Lactuca sativa]		mitogen-activated protein kinase homolog NTF6-like isoform X2 [Lactuca sativa]	N-Term(iTRAQ8plex); M8(Oxidation); T9(Phospho); Y11(Phospho)	0	T(1): 0.0; T(2): 0.0; S(3): 0.0; T(5): 4.8; T(9): 95.2; Y(11): 100.0; T(14): 0.0	129.917	6.85	2	9.92415	2259.94	-2.11953	1.01898	0.824381	1.00153	0.948296	0.987537	1.20491	0.998473	1.06364	0.891558	0.287721
aSGNVsPssDENEEDADQk	2	XP_023759047.1	serine/arginine repetitive matrix protein 1 isoform X2 [Lactuca sativa]		serine/arginine repetitive matrix protein 1 isoform X2 [Lactuca sativa]	N-Term(iTRAQ8plex); S6(Phospho); S8(Phospho); S9(Phospho); K19(iTRAQ8plex)	0	S(2): 0.0; S(6): 100.0; S(8): 100.0; S(9): 100.0	163.779	57.18	3	9.90627e-05	2827.12	-0.861685	0.915374	1.05335	0.851948	0.940224	1.15129	0.908757	1.11308	1.05771	0.888924	0.287885
lFLFPVtTQTPSITPAHsFGstEGR	2	XP_023744825.1	uncharacterized protein LOC111892981 [Lactuca sativa]		uncharacterized protein LOC111892981 [Lactuca sativa]	N-Term(iTRAQ8plex); T7(Phospho); S18(Phospho); S21(Phospho); T22(Phospho)	0	T(7): 7.3; T(8): 7.3; T(10): 85.4; S(12): 7.9; T(14): 92.1; S(18): 99.3; S(21): 92.2; T(22): 8.5	57.307	18.15	3	2.57376	3315.46	3.23223	0.961675	1.09326	0.754599	0.936513	0.993707	1.09851	1.10084	1.06435	0.87989	0.289173
sLsMPPtPttPGtPTTPSPTAAR	6	XP_023736750.1	dormancy-associated protein 1-like [Lactuca sativa]		dormancy-associated protein 1-like [Lactuca sativa]	N-Term(iTRAQ8plex); S3(Phospho); T7(Phospho); T9(Phospho); T10(Phospho); T13(Phospho)	0	Too many isoforms		13.72	3	2.15707	2970.17	-0.591243	0.947693	0.909572	1.03898	0.965416	1.04041	0.988466	1.01829	1.01572	0.950473	0.289515
yEsDINEPyAsSENEEELGDENESTR	2	XP_023750386.1	methyltransferase-like protein 17, mitochondrial [Lactuca sativa]		methyltransferase-like protein 17, mitochondrial [Lactuca sativa]	N-Term(iTRAQ8plex); S3(Phospho); Y9(Phospho); S11(Phospho)	0	Y(1): 0.4; S(3): 99.6; Y(9): 94.7; S(11): 94.7; S(12): 10.6; S(24): 0.0; T(25): 0.0	202.001	45.24	3	0.00126423	3550.33	0.368119	0.934877	0.89972	1.05833	0.96431	0.987646	1.14367	1.01007	1.04713	0.92091	0.292915
yLAssDDEEDDAPPQPSPk	1	XP_023752034.1	uncharacterized protein LOC111900379 [Lactuca sativa]		uncharacterized protein LOC111900379 [Lactuca sativa]	N-Term(iTRAQ8plex); S4(Phospho); S5(Phospho); K19(iTRAQ8plex)	0	Y(1): 66.7; S(4): 66.7; S(5): 66.7; S(17): 0.0	141.129	28.15	3	0.181281	2829.24	2.32001	1.1912	0.980245	1.01631	1.06258	0.817606	1.08	0.926628	0.941413	1.12871	0.29306
dGNVtDEEEsEEETDPNLPk	1	XP_023756092.1	protein decapping 5 [Lactuca sativa]		protein decapping 5 [Lactuca sativa]	N-Term(iTRAQ8plex); T5(Phospho); S10(Phospho); K20(iTRAQ8plex)	0	T(5): 100.0; S(10): 99.8; T(14): 0.2	202.993	40.37	3	0.00847621	3015.28	-0.350677	1.09569	0.974312	1.04353	1.03785	0.902928	0.93461	1.06045	0.965997	1.07438	0.294313
vVQEAVssPDDSGTEGQPDSSDNSGGNSASk	1	XP_023754172.1	la-related protein 1C-like [Lactuca sativa]		la-related protein 1C-like [Lactuca sativa]	N-Term(iTRAQ8plex); S7(Phospho); S8(Phospho); K31(iTRAQ8plex)	0	S(7): 48.6; S(8): 48.6; S(12): 27.5; T(14): 67.2; S(20): 4.0; S(21): 4.0; S(24): 0.2; S(28): 0.0; S(30): 0.0	124.89	33.22	3	0.085162	3776.64	3.9097	1.03329	0.930023	0.915708	0.959673	1.17788	0.993074	0.97694	1.0493	0.914585	0.294424
sLsVGSDFFDGLGLsSPAEPEk	4	PLY98759.1	hypothetical protein LSAT_1X8440 [Lactuca sativa]		hypothetical protein LSAT_1X8440 [Lactuca sativa]	N-Term(iTRAQ8plex); S3(Phospho); S15(Phospho); K22(iTRAQ8plex)	0	S(1): 0.1; S(3): 99.9; S(6): 0.0; S(15): 50.0; S(16): 50.0	311.003	43.78	3	0.00846801	3007.41	-4.39278	0.972738	1.05927	0.883403	0.971804	1.02985	1.00935	1.06981	1.03634	0.93773	0.296416
sVIDVsDEDsEENLGDEGFR	6	XP_023762950.1	histone-lysine N-methyltransferase, H3 lysine-9 specific SUVH7-like [Lactuca sativa]		histone-lysine N-methyltransferase, H3 lysine-9 specific SUVH7-like [Lactuca sativa]	N-Term(iTRAQ8plex); S6(Phospho); S10(Phospho)	0	S(1): 0.0; S(6): 100.0; S(10): 100.0	188.499	48.9	2	0.000784544	2676.09	0.577452	0.900574	0.91711	1.07299	0.963557	1.09865	1.08283	0.960834	1.04744	0.919919	0.297474
sRsPAPTITQTQLR	1	XP_023760572.1	protein argonaute 2-like [Lactuca sativa]		protein argonaute 2-like [Lactuca sativa]	N-Term(iTRAQ8plex); S1(Phospho); S3(Phospho)	1	S(1): 100.0; S(3): 100.0; T(7): 0.0; T(9): 0.0; T(11): 0.0	139.563	19.07	3	1.39922	2019.99	0.440302	0.921003	0.949705	1.06341	0.978041	1.05845	1.02737	1.01131	1.03238	0.947367	0.299573
aNTDNYFDNtDsEEDDDDDDDTMDk	2	XP_023763506.1	U3 small nucleolar RNA-associated protein 14 isoform X2 [Lactuca sativa]		U3 small nucleolar RNA-associated protein 14 isoform X2 [Lactuca sativa]	N-Term(iTRAQ8plex); T10(Phospho); S12(Phospho); K25(iTRAQ8plex)	0	T(3): 0.0; Y(6): 0.0; T(10): 100.0; S(12): 100.0; T(22): 0.0	174.235	49.75	3	0.000358028	3683.35	0.691629	0.923214	1.02386	0.969071	0.972046	1.03511	1.11315	0.958156	1.03547	0.938746	0.300398
gLENLDVAYsPGGRsGFDtPAssTR	7	XP_023768204.1	probable alkaline/neutral invertase D [Lactuca sativa]		probable alkaline/neutral invertase D [Lactuca sativa]	N-Term(iTRAQ8plex); S10(Phospho); S15(Phospho); T19(Phospho); S22(Phospho); S23(Phospho)	1	Y(9): 90.0; S(10): 10.0; S(15): 100.0; T(19): 100.0; S(22): 98.8; S(23): 90.1; T(24): 11.1	145.003	23.17	3	0.239769	3258.25	-0.738515	1.06433	1.17354	0.903446	1.0471	0.973082	0.977847	0.895	0.948643	1.10379	0.300718
lGMWEYGDIEsDDDENPLPGAk	27	XP_023744072.1	ribonuclease TUDOR 2-like [Lactuca sativa]		ribonuclease TUDOR 2-like [Lactuca sativa]	N-Term(iTRAQ8plex); S11(Phospho); K22(iTRAQ8plex)	0	Y(6): 0.0; S(11): 100.0	309.914	51.79	3	0.00127146	3139.44	-1.04923	0.978534	0.99967	0.969112	0.982439	1.03238	0.961147	1.1061	1.03321	0.950861	0.301271
lFDNGGsDsDDLSk	3	XP_023746343.1	protein KRI1 homolog [Lactuca sativa]		protein KRI1 homolog [Lactuca sativa]	N-Term(iTRAQ8plex); S7(Phospho); S9(Phospho); K14(iTRAQ8plex)	0	S(7): 100.0; S(9): 100.0; S(13): 0.0	132.804	20.28	3	0.668013	2237.98	-2.26193	1.00941	0.95922	0.928692	0.965775	1.0914	0.92592	1.09541	1.03758	0.930798	0.301636
tEAAAATsS	3	XP_023771886.1	uncharacterized protein Os08g0359500 [Lactuca sativa]		uncharacterized protein Os08g0359500 [Lactuca sativa]	N-Term(iTRAQ8plex); S8(Phospho)	0	T(1): 0.0; T(7): 1.3; S(8): 49.3; S(9): 49.3	86.3062	20.03	2	0.174292	1192.54	-0.363862	1.0674	1.14995	0.958502	1.05862	0.970813	0.781983	1.06669	0.93983	1.12639	0.302026
sTFTFDSVPGTPAYsYAGsPPADNLFQNR	7	XP_023770376.1	epidermal growth factor receptor substrate 15-like 1 isoform X2 [Lactuca sativa]		epidermal growth factor receptor substrate 15-like 1 isoform X2 [Lactuca sativa]	N-Term(iTRAQ8plex); S1(Phospho); S15(Phospho); S19(Phospho)	0	S(1): 0.0; T(2): 0.5; T(4): 0.5; S(7): 99.0; T(11): 83.3; Y(14): 6.0; S(15): 6.0; Y(16): 6.0; S(19): 98.7	137.222	34.62	3	0.0512193	3651.56	3.74176	0.891557	1.11198	1.06599	1.02317	0.952816	0.96759	0.899873	0.940093	1.08838	0.30221
tTSESDFmtEyVVTR	1	XP_023738592.1	mitogen-activated protein kinase homolog NTF6-like [Lactuca sativa]		mitogen-activated protein kinase homolog NTF6-like [Lactuca sativa]	N-Term(iTRAQ8plex); M8(Oxidation); T9(Phospho); Y11(Phospho)	0	T(1): 0.0; T(2): 0.0; S(3): 0.1; S(5): 50.0; T(9): 50.0; Y(11): 99.8; T(14): 0.1	109.475	3.67	3	24.3547	2245.94	7.00346	0.915257	1.00259	0.982777	0.966873	1.1514	0.956506	1.01736	1.04176	0.928118	0.302638
tGQTsNPNsEDEQDPGGk	7	XP_023749844.1	serrate RNA effector molecule [Lactuca sativa]		serrate RNA effector molecule [Lactuca sativa]	N-Term(iTRAQ8plex); S5(Phospho); S9(Phospho); K18(iTRAQ8plex)	0	T(1): 0.0; T(4): 1.9; S(5): 98.1; S(9): 100.0	234.712	33.07	3	0.0387635	2629.12	-3.05054	1.08587	0.876771	0.938556	0.967067	1.07086	0.992452	1.0765	1.0466	0.924005	0.305191
lVQVSPTTDGssDELVYsSSPk	6	PLY94900.1	hypothetical protein LSAT_4X70101 [Lactuca sativa]		hypothetical protein LSAT_4X70101 [Lactuca sativa]	N-Term(iTRAQ8plex); S11(Phospho); S12(Phospho); S18(Phospho); K22(iTRAQ8plex)	0	S(5): 2.8; T(7): 34.6; T(8): 34.6; S(11): 34.6; S(12): 86.0; Y(17): 6.7; S(18): 0.9; S(19): 49.8; S(20): 49.8	92.8996	15.11	3	5.34625	3144.43	-1.06985	1.0651	0.971192	1.03823	1.02484	0.952373	1.03939	0.929571	0.973778	1.05244	0.306356
dNLTLWTsDIsEEGEDLHk	3	XP_023736470.1	14-3-3 protein 9-like isoform X1 [Lactuca sativa]		14-3-3 protein 9-like isoform X1 [Lactuca sativa]	N-Term(iTRAQ8plex); S8(Phospho); S11(Phospho); K19(iTRAQ8plex)	0	T(4): 0.0; T(7): 5.3; S(8): 95.0; S(11): 99.7	110.638	12.15	3	10.1671	2970.37	2.86291	1.04204	1.0798	1.01754	1.04646	0.911381	0.847734	1.10319	0.954103	1.0968	0.306666
sDLsDsQIGsPDDVSFSQSDISEPR	1	XP_023745735.1	probable WRKY transcription factor 3 [Lactuca sativa]		probable WRKY transcription factor 3 [Lactuca sativa]	N-Term(iTRAQ8plex); S4(Phospho); S6(Phospho); S10(Phospho)	0	S(1): 9.8; S(4): 98.9; S(6): 91.1; S(10): 90.1; S(15): 9.0; S(17): 1.0; S(19): 0.1; S(22): 0.0	88.3786	11.15	3	5.05308	3212.26	-7.93918	0.920809	1.16696	1.14676	1.07818	0.71228	1.011	1.04703	0.923436	1.16757	0.306807
aQADsQDEsLsDIDsEEER	3	PLY99591.1	hypothetical protein LSAT_5X119261 [Lactuca sativa]		hypothetical protein LSAT_5X119261 [Lactuca sativa]	N-Term(iTRAQ8plex); S5(Phospho); S9(Phospho); S11(Phospho); S15(Phospho)	0	S(5): 100.0; S(9): 100.0; S(11): 100.0; S(15): 100.0	189.359	51.54	3	8.73312e-05	2747.95	-2.74173	0.99877	0.982938	0.916172	0.96596	1.02555	0.968315	1.0115	1.00179	0.964237	0.306846
yNFDANItQQDLADTYLPPFk	4	XP_023772615.1	probable beta-D-xylosidase 7 [Lactuca sativa]		probable beta-D-xylosidase 7 [Lactuca sativa]	N-Term(iTRAQ8plex); T8(Phospho); K21(iTRAQ8plex)	0	Y(1): 47.3; T(8): 47.3; T(15): 2.7; Y(16): 2.7	65.672	18.94	2	3.10366	3162.56	-0.791441	1.03419	0.912315	1.34118	1.0959	0.754724	1.05478	0.936003	0.915169	1.19748	0.307227
gSsVtSPLLSR	2	PLY70413.1	hypothetical protein LSAT_9X83160 [Lactuca sativa]		hypothetical protein LSAT_9X83160 [Lactuca sativa]	N-Term(iTRAQ8plex); S3(Phospho); T5(Phospho)	0	S(2): 0.1; S(3): 98.4; T(5): 50.8; S(6): 50.8; S(10): 0.0	125.137	6.95	2	12.9882	1567.74	-0.626372	1.04018	1.04184	1.02044	1.03416	0.868098	1.05381	0.98835	0.970087	1.06604	0.307386
sLsGGLNsPk	3	PLY62102.1	hypothetical protein LSAT_6X65481 [Lactuca sativa]		hypothetical protein LSAT_6X65481 [Lactuca sativa]	N-Term(iTRAQ8plex); S3(Phospho); S8(Phospho); K10(iTRAQ8plex)	0	S(1): 0.0; S(3): 100.0; S(8): 100.0	271.706	32.43	3	0.0448896	1727.86	-0.682942	0.992538	0.999253	0.942851	0.978214	1.04162	0.955105	1.08785	1.02819	0.951392	0.307557
vNYVAPPQPPsPVREGsEEGssPR	3	XP_023733552.1	vesicle-associated protein 1-1-like [Lactuca sativa]		vesicle-associated protein 1-1-like [Lactuca sativa]	N-Term(iTRAQ8plex); S11(Phospho); S17(Phospho); S21(Phospho); S22(Phospho)	1	Y(3): 0.0; S(11): 100.0; S(17): 100.0; S(21): 100.0; S(22): 100.0	323.202	24.77	3	0.30942	3160.31	-0.774299	0.920331	0.947763	1.05675	0.974948	1.04319	1.00649	1.02577	1.02515	0.951029	0.30773
gQVGEDIRsDsDDDD	2	XP_023754709.1	LAG1 longevity assurance homolog 2 isoform X2 [Lactuca sativa]		LAG1 longevity assurance homolog 2 isoform X2 [Lactuca sativa]	N-Term(iTRAQ8plex); S9(Phospho); S11(Phospho)	1	S(9): 100.0; S(11): 100.0	202.63	30.54	2	0.0128488	2086.78	0.346752	0.948639	1.09621	1.04298	1.02928	0.95057	1.01728	0.950273	0.972708	1.05816	0.308807
mISsEPTtPk	2	XP_023738749.1	sodium/hydrogen exchanger 2-like [Lactuca sativa]		sodium/hydrogen exchanger 2-like [Lactuca sativa]	N-Term(iTRAQ8plex); S4(Phospho); T8(Phospho); K10(iTRAQ8plex)	0	S(3): 65.7; S(4): 65.7; T(7): 2.9; T(8): 65.7	95.2647	20.82	3	0.778266	1858.89	-0.385126	1.09986	0.927511	1.08869	1.03869	1.00655	0.932328	0.969021	0.9693	1.07159	0.309473
aYLGSLLsPQk	4	XP_023732508.1	pumilio homolog 2-like isoform X2 [Lactuca sativa]		pumilio homolog 2-like isoform X2 [Lactuca sativa]	N-Term(iTRAQ8plex); S8(Phospho); K11(iTRAQ8plex)	0	Y(2): 0.0; S(5): 0.0; S(8): 100.0	212.786	20.55	3	0.950652	1865.03	-2.6457	1.00511	0.987315	0.923499	0.971974	1.09796	0.937061	1.07703	1.03735	0.936979	0.309808
nsVSsPIITR	3	PLY82517.1	hypothetical protein LSAT_2X107041 [Lactuca sativa]		hypothetical protein LSAT_2X107041 [Lactuca sativa]	N-Term(iTRAQ8plex); S2(Phospho); S5(Phospho)	0	S(2): 99.9; S(4): 50.0; S(5): 50.0; T(9): 0.0	113.345	9.68	2	7.65367	1537.73	-0.194888	1.02602	0.930083	0.952978	0.969695	0.966399	1.13055	1.01032	1.03575	0.93622	0.310622
vEESEEAGEtsEsAPEsESESTETEVVEPSEVR	1	XP_023748274.1	heat shock protein 90-5, chloroplastic [Lactuca sativa]		heat shock protein 90-5, chloroplastic [Lactuca sativa]	N-Term(iTRAQ8plex); T10(Phospho); S11(Phospho); S13(Phospho); S17(Phospho)	0	Too many isoforms		45.88	3	0.00140088	4178.58	-1.45081	0.92545	1.10927	1.3215	1.11874	1.2054	0.763853	0.715875	0.895044	1.24993	0.311581
eIAssGPPssEIVVEk	2	PLY69646.1	hypothetical protein LSAT_5X49780 [Lactuca sativa]		hypothetical protein LSAT_5X49780 [Lactuca sativa]	N-Term(iTRAQ8plex); S4(Phospho); S5(Phospho); S9(Phospho); S10(Phospho); K16(iTRAQ8plex)	0	S(4): 100.0; S(5): 100.0; S(9): 100.0; S(10): 100.0	154.581	26.15	3	0.210023	2557.11	-1.17762	1.00102	1.05471	1.0573	1.03767	1.05161	0.840035	0.993368	0.96167	1.07903	0.311791
aGGDGsVNGEEAAsSESSNEATTk	1	XP_023744774.1	uncharacterized protein LOC111892930 [Lactuca sativa]		uncharacterized protein LOC111892930 [Lactuca sativa]	N-Term(iTRAQ8plex); S6(Phospho); S14(Phospho); K24(iTRAQ8plex)	0	S(6): 100.0; S(14): 24.8; S(15): 24.8; S(17): 24.8; S(18): 24.8; T(22): 0.9; T(23): 0.0	139.48	4.18	4	40.3333	3023.29	-2.48453	1.09342	1.10663	0.939415	1.04649	1.06097	0.864601	0.941939	0.955837	1.09484	0.311791
lSTAskPsIVA	1	XP_023763629.1	40S ribosomal protein S6-like [Lactuca sativa]		40S ribosomal protein S6-like [Lactuca sativa]	N-Term(iTRAQ8plex); S5(Phospho); K6(iTRAQ8plex); S8(Phospho)	0	S(2): 96.2; T(3): 3.8; S(5): 0.0; S(8): 100.0	83.128	7.78	3	21.2491	1841.96	-1.49013	0.9667	0.995772	1.02124	0.994571	1.01674	1.01355	1.00865	1.01298	0.981827	0.312197
tETVTGsPNsEVDQALk	5	XP_023770715.1	calmodulin-binding transcription activator 4-like [Lactuca sativa]		calmodulin-binding transcription activator 4-like [Lactuca sativa]	N-Term(iTRAQ8plex); S7(Phospho); S10(Phospho); K17(iTRAQ8plex)	0	T(1): 0.0; T(3): 0.1; T(5): 2.3; S(7): 97.7; S(10): 100.0	210.078	27.87	3	0.238997	2544.2	-2.14362	1.0006	0.948424	1.03278	0.993933	0.984662	1.05751	1.06013	1.0341	0.961156	0.313469
sLVSDGVPscsSSPAR	6	PLY93561.1	hypothetical protein LSAT_2X98781 [Lactuca sativa]		hypothetical protein LSAT_2X98781 [Lactuca sativa]	N-Term(iTRAQ8plex); S9(Phospho); C10(Carbamidomethyl); S11(Phospho)	0	S(1): 0.0; S(4): 4.1; S(9): 88.3; S(11): 84.7; S(12): 11.5; S(13): 11.5	87.3557	6.45	2	13.2368	2069.88	-3.73282	0.959112	0.971229	0.916174	0.948838	1.21333	1.09495	0.88006	1.06278	0.892789	0.313718
sQANAQEPESQTENsDAEk	1	PLY84162.1	hypothetical protein LSAT_6X117800 [Lactuca sativa]		hypothetical protein LSAT_6X117800 [Lactuca sativa]	N-Term(iTRAQ8plex); S15(Phospho); K19(iTRAQ8plex)	0	S(1): 0.0; S(10): 1.8; T(12): 1.8; S(15): 96.3	149.04	6.44	3	30.7794	2751.25	-1.34027	0.959743	1.05924	0.868111	0.962366	0.995058	1.00778	1.11693	1.03992	0.925421	0.313932
aSQVVEkEssVDEsssDVDsDDDVDWR	1	XP_023769993.1	zinc finger protein 830 [Lactuca sativa]		zinc finger protein 830 [Lactuca sativa]	N-Term(iTRAQ8plex); K7(iTRAQ8plex); S9(Phospho); S10(Phospho); S14(Phospho); S15(Phospho); S16(Phospho); S20(Phospho)	1	S(2): 0.0; S(9): 100.0; S(10): 100.0; S(14): 100.0; S(15): 100.0; S(16): 100.0; S(20): 100.0	108.31	29.66	3	0.0455824	4073.49	2.04379	1.02751	0.99829	0.901479	0.97576	0.978331	1.04318	1.06337	1.0283	0.94891	0.316409
kGSAtPtsSSQDEEGGYSR	2	XP_023740367.1	serine/threonine-protein kinase PAK 1 isoform X1 [Lactuca sativa]		serine/threonine-protein kinase PAK 1 isoform X1 [Lactuca sativa]	K1(iTRAQ8plex); N-Term(iTRAQ8plex); T5(Phospho); T7(Phospho); S8(Phospho)	1	S(3): 0.5; T(5): 99.1; T(7): 96.5; S(8): 51.7; S(9): 51.7; S(10): 0.5; Y(17): 0.0; S(18): 0.0	114.943	5.12	3	21.3789	2792.17	-0.564649	1.07951	1.01522	0.984536	1.02642	1.04486	0.932556	0.94753	0.974984	1.05276	0.316528
aGDDGDEDGsDVDNLAGR	11	PLY73229.1	hypothetical protein LSAT_8X115241 [Lactuca sativa]		hypothetical protein LSAT_8X115241 [Lactuca sativa]	N-Term(iTRAQ8plex); S10(Phospho)	0	S(10): 100.0	483.267	77.91	2	5.71991e-07	2161.88	-1.42476	0.987742	0.96555	0.99177	0.981687	1.0728	0.995989	0.979043	1.01594	0.96628	0.316867
yPFIIQNATtPLPsPR	5	XP_023762529.1	AT-hook motif nuclear-localized protein 14-like [Lactuca sativa]		AT-hook motif nuclear-localized protein 14-like [Lactuca sativa]	N-Term(iTRAQ8plex); T10(Phospho); S14(Phospho)	0	Y(1): 0.0; T(9): 6.6; T(10): 93.4; S(14): 100.0	88.7277	9.07	3	18.136	2279.12	0.20626	0.997723	1.10098	0.982125	1.02694	1.03026	0.952185	0.936519	0.972988	1.05545	0.317078
tIALGk	2	PLY62341.1	hypothetical protein LSAT_4X58161 [Lactuca sativa]		hypothetical protein LSAT_4X58161 [Lactuca sativa]	N-Term(Acetyl); T1(Phospho); K6(iTRAQ8plex)	0	T(1): 100.0	159.579	26.36	2	0.0793038	1028.57	-1.75268	0.9367	1.05989	1.09478	1.03046	0.994032	0.993472	0.920271	0.969258	1.06314	0.319169
gGGsGDDVVAEGIESSk	3	XP_023762619.1	ubiquitin domain-containing protein DSK2b-like isoform X2 [Lactuca sativa]		ubiquitin domain-containing protein DSK2b-like isoform X2 [Lactuca sativa]	N-Term(iTRAQ8plex); S4(Phospho); K17(iTRAQ8plex)	0	S(4): 100.0; S(15): 0.0; S(16): 0.0	141.924	15.88	3	3.33886	2252.08	-2.57691	1.02103	0.977479	1.02929	1.00927	1.0001	1.00008	0.942789	0.980991	1.02882	0.320642
ncQNsPk	2	XP_023740171.1;XP_023739479.1	serine/arginine-rich splicing factor RS2Z33-like isoform X2 [Lactuca sativa]		serine/arginine-rich splicing factor RS2Z33-like isoform X2 [Lactuca sativa]	N-Term(iTRAQ8plex); C2(Carbamidomethyl); S5(Phospho); K7(iTRAQ8plex)	0	S(5): 100.0	155.499	23.63	3	0.327301	1535.75	-0.892136	0.978057	0.959204	1.02133	0.986198	0.97392	1.04285	1.04066	1.01914	0.967674	0.321625
lEsSsSQNMENYTNIR	2	PLY88253.1	hypothetical protein LSAT_4X93840 [Lactuca sativa]		hypothetical protein LSAT_4X93840 [Lactuca sativa]	N-Term(iTRAQ8plex); S3(Phospho); S5(Phospho)	0	S(3): 95.0; S(4): 7.2; S(5): 48.8; S(6): 48.8; Y(12): 0.2; T(13): 0.0	85.6971	8.57	2	7.96443	2336.98	1.26612	1.00998	0.982558	0.958039	0.983525	0.965755	1.07314	1.02854	1.02248	0.961904	0.322866
qQEEsGEEsEDsEWEEVTEk	2	PLY99455.1	hypothetical protein LSAT_6X15381 [Lactuca sativa]		hypothetical protein LSAT_6X15381 [Lactuca sativa]	N-Term(iTRAQ8plex); S5(Phospho); S9(Phospho); S12(Phospho); K20(iTRAQ8plex)	0	S(5): 100.0; S(9): 100.0; S(12): 100.0; T(18): 0.0	125.982	16.82	3	1.09704	3232.25	-2.82618	0.984932	0.96768	0.936296	0.962969	1.05708	1.15572	0.916015	1.04294	0.923322	0.323013
sLsQPSFFPLDSLPPLsPSPYR	8	PLY91893.1	hypothetical protein LSAT_8X126961 [Lactuca sativa]		hypothetical protein LSAT_8X126961 [Lactuca sativa]	N-Term(iTRAQ8plex); S3(Phospho); S17(Phospho)	0	S(1): 0.1; S(3): 99.9; S(6): 0.0; S(12): 0.0; S(17): 50.0; S(19): 50.0; Y(21): 0.1	341.942	31.11	3	0.155009	2896.39	0.4343	0.933924	0.99306	0.912119	0.946368	1.25685	0.999651	0.928732	1.06174	0.891333	0.323576
nLITTGGGGsPAQtSGDETSSk	2	XP_023750231.1	BEL1-like homeodomain protein 1 [Lactuca sativa]		BEL1-like homeodomain protein 1 [Lactuca sativa]	N-Term(iTRAQ8plex); S10(Phospho); T14(Phospho); K22(iTRAQ8plex)	0	T(4): 0.0; T(5): 0.0; S(10): 95.3; T(14): 8.8; S(15): 86.8; T(19): 4.4; S(20): 4.4; S(21): 0.2	152.281	25.56	3	0.456151	2833.31	-0.487258	1.04918	0.943975	0.932048	0.975068	1.06196	0.971909	1.04753	1.02713	0.949309	0.32578
sSLssPSLSTR	1	XP_023734743.1	1-phosphatidylinositol-3-phosphate 5-kinase FAB1B-like [Lactuca sativa]		1-phosphatidylinositol-3-phosphate 5-kinase FAB1B-like [Lactuca sativa]	N-Term(iTRAQ8plex); S4(Phospho); S5(Phospho)	0	S(1): 0.0; S(2): 0.2; S(4): 100.0; S(5): 99.5; S(7): 0.2; S(9): 0.0; T(10): 0.0	91.2417	1.36	2	32.3163	1585.71	-2.80559	1.08445	1.01257	0.974374	1.0238	1.02009	0.950918	0.972364	0.981126	1.04349	0.32654
sLPYPtSPLQPPsPk	2	XP_023736832.1	enhancer of mRNA-decapping protein 4-like isoform X2 [Lactuca sativa]		enhancer of mRNA-decapping protein 4-like isoform X2 [Lactuca sativa]	N-Term(iTRAQ8plex); T6(Phospho); S13(Phospho); K15(iTRAQ8plex)	0	S(1): 0.9; Y(4): 33.0; T(6): 33.0; S(7): 33.0; S(13): 100.0	142.14	13.55	3	7.55527	2377.2	-4.46125	0.918638	0.996377	0.954095	0.95637	1.03133	1.21052	0.919894	1.05391	0.907446	0.327811
vEDsDsFGsGDFsD	2	XP_023736728.1	homeobox-DDT domain protein RLT1 [Lactuca sativa]		homeobox-DDT domain protein RLT1 [Lactuca sativa]	N-Term(iTRAQ8plex); S4(Phospho); S6(Phospho); S9(Phospho); S13(Phospho)	0	S(4): 100.0; S(6): 100.0; S(9): 100.0; S(13): 100.0	145.121	23.69	2	0.00983395	2087.62	0.485356	0.968916	0.907977	1.0036	0.960165	1.08762	1.15525	0.904042	1.04897	0.91534	0.329648
sSPSSsSTMESLILQLHEISAVk	7	XP_023741307.1	uridine 5'-monophosphate synthase [Lactuca sativa]		uridine 5'-monophosphate synthase [Lactuca sativa]	N-Term(Acetyl); S6(Phospho); K23(iTRAQ8plex)	0	S(1): 16.4; S(2): 0.8; S(4): 0.8; S(5): 16.4; S(6): 16.4; S(7): 16.4; T(8): 16.4; S(11): 16.4; S(20): 0.0	107.15	30.34	3	0.17916	2857.43	3.79273	1.01114	0.957462	0.894658	0.95442	0.900228	1.13465	1.09242	1.04243	0.91557	0.330923
eGDDEDVNsVENLsG	3	XP_023735924.1	trihelix transcription factor ASIL2 [Lactuca sativa]		trihelix transcription factor ASIL2 [Lactuca sativa]	N-Term(iTRAQ8plex); S9(Phospho); S14(Phospho)	0	S(9): 100.0; S(14): 100.0	204.55	65.32	2	5.86061e-06	2042.78	0.0414197	0.968304	1.05035	1.03284	1.01717	0.888435	1.01911	0.989153	0.965565	1.05344	0.331531
[truncated: 682 more rows]
